# Supplementary material
Source: publisher site journal article supplement (https://www.spandidos-publications.com/4170/downloadSupplementary)
Supplement: Supplementary file 1 [file downloadSupplementary]

## Sheet: DEmRNAs in TCGA dataset 
Table SI. Differentially expressed mRNAs in TCGA dataset.
gene_name	logFC	AveExpr	t	P.Value	adj.P.Val	B	UP_DOWN	TCGA.D7.5577.01A	TCGA.D7.6818.01A	TCGA.BR.7958.01A	TCGA.D7.8572.01A	TCGA.VQ.A91Z.01A	TCGA.HU.A4HD.01A	TCGA.VQ.A8PQ.01A	TCGA.IN.A6RN.01A	TCGA.BR.8679.01A	TCGA.CG.5726.01A	TCGA.BR.6453.01A	TCGA.HU.A4GQ.01A	TCGA.VQ.A8PP.01A	TCGA.HF.7132.01A	TCGA.BR.A4IV.01A	TCGA.BR.4371.01A	TCGA.BR.8296.01A	TCGA.R5.A7ZR.01A	TCGA.BR.8680.01A	TCGA.VQ.A8P2.01A	TCGA.IN.A6RL.01A	TCGA.CD.A48A.01A	TCGA.VQ.A92D.01A	TCGA.CD.8533.01A	TCGA.HU.A4GT.01A	TCGA.KB.A6F7.01A	TCGA.D7.A74A.01A	TCGA.IN.A7NR.01A	TCGA.HU.8602.01A	TCGA.BR.6456.01A	TCGA.CD.8524.01A	TCGA.VQ.A8PO.01A	TCGA.BR.7717.01A	TCGA.CG.4475.01A	TCGA.HU.A4GP.01A	TCGA.BR.A4J9.01A	TCGA.VQ.A91E.01A	TCGA.HU.A4GD.01A	TCGA.CD.5804.01A	TCGA.D7.A747.01A	TCGA.KB.A93G.01A	TCGA.RD.A8MV.01A
A1CF	1.61552	8.19083	3.04532	0.00247561	0.00778094	-2.39659	UP	9.31288	12.3424	8.22882	11.9737	6.65821	12.3737	8.41785	4.75489	12.2012	9.18735	10.1624	9.26913	5.42626	10.2021	6.04439	12.0835	5.12928	11.5859	7.49985	7.18982	7.11894	6.08746	12.2	13.3428	11.3509	7.45121	9.66	7.83289	2	8.66534	7.45121	10.0458	8.43879	5.42626	8.89785	9.49985	7.14975	10.9144	7.22882	8.65821	7.21917	9.82337
A2M-AS1	-1.29046	5.6163	-5.97146	5.13232e-09	6.33859e-08	10.0206	DOWN	2.80735	5.75489	3	6.62936	7.33985	5.64386	7.48382	2.80735	5.2854	3	5.45943	6.06609	5.49185	5.85798	7.82018	3.16993	5.49185	5.90689	4.85798	5.61471	3.32193	6.42626	4.58496	7.10852	5	5.9542	2.58496	4.16993	3.45943	6.10852	6.30378	4.32193	4.70044	6.12928	4.52356	8.66534	5.32193	4.90689	5.93074	7.54689	5.78136	5.58496
A4GNT	-1.25779	5.58242	-1.99876	0.0462995	0.0966527	-4.97631	DOWN	8.44708	3.16993	8.45943	3.32193	1	3	9.33316	7.92481	4.39232	4.70044	2	0	5.55459	11.5868	8.94544	3.58496	9.68299	10.774	0	1	7.49185	3.80735	2.58496	2	1	8.96578	9.93664	7.08746	1.58496	7.41785	4.32193	0	4.08746	3	6.93074	5.20945	8.53138	6.14975	7.92481	3.45943	5.85798	9.90839
AACSP1	1.39687	3.19205	3.16642	0.00165958	0.00547907	-2.03167	UP	2.80735	1	0	8.89785	7.65821	9.41785	4.08746	5.04439	2.58496	8.41785	1	2.32193	2.80735	2.32193	1.58496	3.90689	6.37504	6.08746	4.45943	5.88264	2.32193	5.78136	2.58496	4.58496	0	5.72792	0	2.58496	3	0	2.32193	1.58496	0	0	4.39232	1	3	7.30378	0	3.16993	0	5.67243
AADAC	-1.81065	7.62812	-3.47127	0.000573505	0.00213277	-1.05335	DOWN	11.7022	3.16993	6.96578	6.91886	1.58496	10.102	11.6834	5.9542	8.59991	5.80735	7.56224	5.70044	4.70044	9.08481	10	7.37504	10.5118	11.5147	4.52356	9.61839	10.6987	8.40939	10.3923	6.39232	7.15987	9.14466	7.12928	6.02237	0	5.67243	9.18982	9.62205	4.08746	6.64386	10.2396	4.08746	9.44087	8.59246	9.75989	5	7.19967	7.18982
AADACL2	-1.98767	1.74946	-6.9976	1.07953e-11	2.30283e-10	16.0028	DOWN	0	0	0	3	0	4.24793	5.16993	0	4.75489	0	2	0	0	1.58496	4.32193	2.32193	5	0	0	1	2	5	3.80735	3.16993	1	1.58496	0	1	0	2.80735	2.58496	1	0	0	3	2	0	5.55459	1	3.70044	1.58496	0
AARD	-2.32045	4.43352	-6.99757	1.07975e-11	2.30283e-10	16.0026	DOWN	1.58496	5.42626	3.70044	6.14975	0	4.85798	5.12928	1.58496	4.16993	3.45943	5.88264	6.52356	3	4.16993	7.10852	3.16993	5.35755	1	3.16993	3.70044	4.64386	6.72792	3.32193	4.24793	3.16993	7.94837	4	2.58496	0	6.02237	5	3.32193	5.39232	5.67243	3.90689	8.79766	4.24793	5.16993	6.26679	5.16993	6.16993	4.52356
ABALON	1.16649	6.39731	5.4637	8.14332e-08	7.85201e-07	7.35343	UP	7.83289	6.35755	6.39232	6.82018	7.47573	7.83289	6.80735	3.90689	8.29921	6.58496	4.70044	6.94251	7.5157	6.16993	5.12928	4.80735	6.67243	5.52356	5.32193	6.06609	5.80735	6.42626	6.78136	8.62571	6.02237	7.86419	5.80735	5.45943	9.24317	7.2384	7.32193	5.58496	5.67243	6.96578	5.90689	5.64386	7.06609	6.02237	5.97728	4.32193	5.93074	6.44294
ABAT	-1.11348	9.95354	-5.04892	6.71895e-07	5.28167e-06	5.32677	DOWN	10.4105	10.9388	8.19476	12.2802	11.445	11.7164	11.4868	8.29462	10.374	8.47573	8.67596	8.02791	9.97585	10.6175	9.76155	8.90989	9.43463	9.92778	9.74819	10.2877	9.56796	9.97585	9.91439	14.2956	9.00282	9.94983	8.02791	8.80735	8.25739	9.16993	10.2167	8.54303	8.22882	9.50581	10.7432	9.5411	10.0647	9.76984	10.2877	7.8009	8.74147	10.5953
ABCA13	2.10816	6.59877	5.4434	9.05767e-08	8.63846e-07	7.25101	UP	2.80735	3.90689	7.02237	7.37504	8.37504	10.1674	11.4083	6.32193	6.30378	4.39232	3.90689	4	5.78136	6.24793	6.61471	9.82496	8.40514	6.04439	6.78136	4.90689	7.74819	7.04439	5.39232	5.32193	5	9.99718	3	6.90689	4.24793	8.58496	6.52356	5.9542	3.90689	9.90539	8.79116	4.70044	5.83289	9.41363	6.65821	7.17991	9.49785	7.78136
ABCA17P	1.00114	4.42842	3.25056	0.00124768	0.00425546	-1.77017	UP	5.55459	4.75489	1	5.97728	4	5.08746	6.67243	2	4.32193	3.45943	2.80735	9.57365	8.30834	3	5.08746	5.32193	7.93664	2	5.42626	4.75489	2.58496	7.07682	3.45943	7.67948	1.58496	5.67243	2.32193	3.45943	8.84549	4.80735	4.32193	3	3.16993	4.9542	5.24793	3.32193	4.16993	8.45533	4.16993	4.9542	3.90689	3.80735
ABCA6	-1.11977	7.7485	-4.43005	1.21286e-05	6.6273e-05	2.56739	DOWN	6.58496	8.07146	6.59991	9.26444	4.64386	8.12928	10.4929	6.02237	8.24317	3.80735	8.25267	7.73471	7.53916	8.16491	9.66711	6.45943	8.89482	5.49185	6.98868	3.80735	7.37504	8.24317	7.35755	7.90689	6.88264	5.97728	5.61471	5.61471	5.45943	8.55842	9.07414	7.35755	5.64386	8.60363	7.03342	9.03342	7.37504	8.72792	6.47573	8.12928	10.5048	7.61471
ABCA8	-2.83433	8.29111	-7.55492	2.79856e-13	8.18322e-12	19.5625	DOWN	6.26679	8.44708	5.45943	7.72792	3	9.7364	11.9218	6.82018	8.59991	5.16993	9.94251	8.67948	7.42626	10.1267	11.9237	5.90689	9.00282	3.70044	5.97728	2.80735	8.47573	7.78136	6.56986	8.01123	4.64386	8.12412	4.64386	8.21432	4.24793	9.29232	10.1836	5.08746	5.90689	8.60733	7.81378	10.5793	9.11374	8.3966	7.24793	9.49386	7.45121	9.69697
ABCA9	-1.56461	7.11289	-5.25367	2.41106e-07	2.09138e-06	6.3098	DOWN	4.9542	8.10852	5.64386	7.97154	5.45943	7.9542	9.68825	5.52356	8.09276	2.58496	7.57743	7.75489	7.11894	7.72792	9.10329	6.47573	7.84549	4.90689	5.42626	3.45943	6.10852	7.56224	7.2384	7.49185	6.22882	5.24793	4.52356	5.93074	1.58496	8.62571	8.62936	6.39232	5.42626	8.32643	5.32193	9.2384	5.72792	8.30378	6.2854	8.65821	9.00282	7.04439
ABCA9-AS1	1.2301	2.68049	3.60216	0.000354651	0.00139137	-0.607322	UP	0	5.58496	0	4.85798	4.45943	6.90689	3.90689	0	5.83289	1	2	3	1	2.58496	3.32193	3.70044	4.32193	4.64386	1.58496	0	4.24793	5.42626	1.58496	5.35755	3.70044	3.32193	3	2.80735	0	2	5.12928	3.70044	4.70044	3.16993	3.32193	3.58496	2	6.24793	4.45943	3	5.32193	5.49185
ABCB5	-1.08792	3.48481	-3.10676	0.00202418	0.00651942	-2.21314	DOWN	2	3.45943	0	6.39232	2	7.43463	5.39232	1	4.90689	1	4.80735	5.58496	3.16993	2.58496	3.45943	3.58496	7.27612	1	5.16993	1	2	7.26679	0	4.39232	1	1	1.58496	2	1	5	6	2.32193	2.32193	5.04439	4.80735	3.32193	2.58496	8.77479	2.80735	5.58496	3.80735	1.58496
ABCC13	-1.01188	3.69009	-2.48399	0.0133939	0.0338259	-3.90933	DOWN	1	1.58496	0	4.64386	1.58496	7.40088	3.70044	0	1	2	5.04439	5.2854	3.58496	4.08746	3.58496	5.16993	6.39232	4.70044	5.20945	3.45943	3.16993	3.70044	3.45943	3.32193	7.19967	3	5.32193	1	1.58496	8.87036	2.80735	6.32193	5.97728	1	5.61471	2	6.64386	7.36632	2.80735	6.10852	1.58496	7.27612
ABCC3	1.35187	12.9722	5.28273	2.07918e-07	1.82908e-06	6.45204	UP	13.4175	10.9106	12.6179	12.3861	14.8987	13.4506	14.2863	12.4522	13.5725	12.9823	11.9465	12.7518	15.1193	13.4733	11.8599	12.6339	13.6323	13.4535	12.817	13.0743	14.0357	13.1254	15.1697	10.6339	12.7341	10.7756	14.3502	12.4499	12.1926	13.8361	15.3189	13.6304	12.2079	14.1741	14.7001	11.8009	14.4728	12.8178	13.1605	10.5236	13.1704	13.5588
ABCC8	-2.1325	4.56422	-5.81841	1.20531e-08	1.38067e-07	9.19553	DOWN	2.32193	12.0039	3.58496	5.80735	8.39232	2.32193	4.9542	7.04439	3	3.32193	2	3	3.16993	5.16993	5.72792	4.70044	7.08746	2.80735	2.32193	1.58496	4.39232	5.55459	3.16993	10.3805	0	2	2.58496	7.04439	3.16993	4.58496	2.32193	1	0	4.39232	3.58496	9.15987	5.32193	7.3837	2.58496	4	3.90689	3.16993
ABCD2	-1.03171	5.92614	-3.75387	0.000199496	0.000832835	-0.071021	DOWN	5.97728	4.70044	6.93074	6.78136	2.58496	5.32193	10.014	2	5.32193	3.45943	6.16993	5.85798	6.22882	8.14466	8.65105	6.04439	7.33985	4.70044	4.80735	3	2.80735	6.33985	3.58496	4.32193	4.64386	6.52356	5.04439	3.32193	7.12928	6.08746	6.35755	6.89482	3.90689	4.85798	5.08746	8.34873	7.30378	6.75489	5.32193	7.43463	4.39232	6.72792
ABCG2	-1.31349	8.12751	-4.86698	1.62425e-06	1.16441e-05	4.48221	DOWN	5.24793	9.27845	5.16993	8.07146	6.20945	12.1376	10.2288	6	9.76984	5.52356	9.12412	5.12928	5.90689	9.47168	8.85175	9.17493	8.18982	7.16993	5.24793	6.20945	6.52356	8.24317	8.29002	8.31288	7.60733	7.83289	8.93369	6.10852	5.32193	8.02791	8.37069	6.04439	6.59991	7.90689	9.50383	8.72792	7.47573	10.388	8.29921	8.77808	7.67243	7.83289
ABHD11	1.23062	11.3971	7.35439	1.06647e-12	2.74865e-11	18.2577	UP	10.4094	10.9144	10.352	11.2306	12.1808	13.2137	11.0231	8.98299	11.9099	12.2989	11.4838	12.0604	12.3592	12.8555	10.207	11.8451	11.6537	11.8607	11.5387	11.8975	10.7013	12.0891	12.64	11.9099	13.1517	12.0217	11.8634	9.35535	11.5167	12.8307	11.4009	13.0987	11.0519	11.9281	12.0553	10.0417	12.1969	11.6957	12.8844	9.35755	10.6891	11.6055
ABHD17C	1.06216	12.2891	5.78883	1.41864e-08	1.60032e-07	9.03817	UP	12.5788	11.0928	11.9333	11.8895	13.0951	12.9771	12.4813	11.9582	13.6499	13.4444	11.9009	12.9926	13.8145	12.8293	11.1105	12.6396	11.9586	12.7649	12.8068	13.2116	12.8512	11.8041	14.1825	12.2435	13.4847	11.4783	13.226	10.6484	13.4936	12.5157	12.7136	13.6532	12.4442	12.7524	14.045	10.9278	13.5523	11.4651	11.0934	9.74315	12.5113	12.4778
ABHD6	-1.08566	9.56606	-8.44219	5.55264e-16	2.84502e-14	25.6436	DOWN	9.86109	9.17243	8.33092	9.86109	10.7707	10.3554	9.96723	8.40088	10.1662	9.82337	9.59246	9.35094	8.93369	10.3231	9.84862	9.12153	8.8857	9.87036	9.13186	10.1561	9.03617	8.73809	9.20212	9.14211	9.69349	9.02514	10.0755	7.7879	10.242	10.1874	9.77808	8.88264	9.27146	9.17493	10.7507	9.41785	11.1724	8.47978	9.02514	8.44708	9.14975	9.48583
ABI3BP	-2.3563	10.4565	-6.8637	2.51685e-11	5.01665e-10	15.1792	DOWN	9.20945	10.4969	11.1478	10.6944	6.33985	12.1914	13.2834	8.61839	10.9069	7.45943	11.6519	11.9535	10.3902	12.3567	13.6834	9.38802	11.5831	8.40514	7.25739	6.78136	9.94105	10.1849	7.56224	10.2854	7.33092	8.33985	8.90689	9.50978	7.27612	11.9207	10.8242	10.0417	10.2467	10.8603	9.58496	14.5796	9.89936	8.31741	9.83131	11.5182	10.9866	11.1357
ACACB	-1.51521	10.644	-7.54976	2.89742e-13	8.4578e-12	19.5287	DOWN	7.65105	10.933	9.44915	10.8626	10.6891	11.0961	12.1699	9.09803	11.8661	9.66356	10.5401	10.0112	9.61287	12.0126	13.2615	9.69174	10.6952	10.3966	8.99152	10.3106	9.41151	10.6193	8.2384	11.4393	7.37504	10.9922	10.5868	8.56605	9.0634	11.0286	11.1396	11.2312	8.40939	9.60733	11.0362	12.9926	10.6211	10.3826	10.5915	11.1389	11.6452	11.1267
ACADL	-2.54323	3.85743	-7.91053	2.44949e-14	8.67979e-13	21.9408	DOWN	0	2	2.32193	4.70044	2	3.45943	6.12928	5.93074	3.16993	2	3.32193	3	7.21917	6.04439	6.26679	2.32193	6.45943	2.80735	3.32193	1	5.04439	5.70044	2	3.80735	2	0	3.16993	4.70044	1	4.39232	5.85798	1	2.80735	6.64386	3.58496	3.90689	5.67243	5.45943	3.16993	4.52356	5.16993	4.16993
ACAN	3.66832	8.78647	13.6678	2.9323e-35	1.00062e-31	69.2551	UP	9.82337	9.46148	9.91588	11.2691	9.73978	9.79604	8.72451	6.76818	11.2842	6.12928	8.73471	9.26913	8.65821	9.31741	9.04712	8.08746	9.35535	7.53916	7.70736	9.90689	6.40939	7.94837	11.5392	8.57743	9.47168	8.98868	6.50779	4.85798	10.1874	12.3298	9.72451	10.0224	10.5314	10.9758	8.39232	9.49785	9.40514	8.08215	9.95565	5.24793	13.343	8.17991
ACBD7	2.0244	5.61708	7.1923	3.08499e-12	7.26014e-11	17.2225	UP	4.45943	6.85798	5.49185	6.47573	7.14975	5.32193	5.58496	3.70044	4.45943	5.35755	3.58496	7.35755	7.73471	7.08746	5.12928	4.9542	7.02237	5	6.26679	3	3	6.71425	5.42626	10.0098	5.78136	6.32193	5.78136	3.80735	10.5147	6.88264	5.70044	4.70044	6.08746	5.20945	5.16993	3.90689	6.70044	6.44294	3.80735	3.80735	5.75489	5.93074
ACE2	-1.5632	8.27765	-3.22368	0.00136762	0.00461565	-1.85441	DOWN	9.12412	4.75489	9.45738	9.19722	3.70044	12.1283	9.29002	7.20945	7.7879	8.05528	8.224	8.83289	4.90689	8.08215	7.08746	11.93	7.22882	13.7646	9.5411	7.22882	5.20945	5.58496	9.48583	8.59246	8.87036	10.196	9.05257	9.26679	4	12.4105	3	8.93958	5.39232	8.24317	7.90087	8.74483	9.7879	11.3805	7.48382	7.53916	5.42626	11.0105
ACER1	-1.5755	2.29702	-4.74667	2.86954e-06	1.95333e-05	3.93885	DOWN	2	0	1.58496	4	1.58496	1.58496	6.52356	0	1	0	3.32193	3.16993	1.58496	2.32193	4.08746	2.58496	5.72792	2.32193	4.45943	2.80735	0	5.04439	2	1.58496	0	1.58496	3.80735	3.45943	1	1.58496	1	0	0	0	2	3.70044	2.58496	7.2854	1.58496	3.16993	2	2
ACER2	-1.322	8.92216	-4.40385	1.36153e-05	7.36305e-05	2.4577	DOWN	8.92184	8.49985	7.40088	9.43671	4.58496	10.1189	9.56605	8.96867	9.30606	11.0063	7.88874	9.10852	8.60733	11.9296	8.03892	9.79928	9.86419	7.90689	6.35755	10.1072	9.9542	7.26679	8.86419	7.2854	10.1124	9.06878	9.9263	7.91886	10.3365	8.76155	11.0928	8.2384	6.78136	7.91886	12.2318	7.90689	11.9348	8.18982	7.8392	6.53916	8.77479	10.6609
ACKR1	-2.77987	9.16679	-6.99022	1.13145e-11	2.40557e-10	15.9571	DOWN	6.82018	9.99435	8.36632	9.40301	4.52356	10.4346	12.0536	7.78136	9.72451	8.50383	12.7247	9.74819	8.13955	10.2021	11.9819	5.67243	10.363	6.06609	2.58496	5.04439	9.93221	7.66534	7.22882	9.22882	6.98868	7.66534	7.03342	10.6366	7.82655	10.1561	10.1898	7.09803	9.50383	10.1923	9.06609	12.3376	7.62936	5.72792	10.4788	9.18239	10.6917	10.6156
ACKR3	-1.01836	10.1025	-5.79013	1.40853e-08	1.59049e-07	9.04508	DOWN	9.18735	10.3015	8.94837	11.1344	10.1849	10.983	9.69	9.93958	10.421	9.63844	10.1033	9.36194	9.60363	10.0056	11.6046	8.82972	9.45943	8.80735	8.44294	9.83447	9.25267	9.24079	10.7566	9.67243	9.76487	9.66178	8.11374	7.83289	10.7532	11.4205	10.5555	10.1085	9.80735	11.8106	10.242	10.0251	9.45943	9.26913	10.2372	8.25267	13	8.49985
ACKR4	-1.12859	7.62843	-3.40461	0.000728455	0.00263324	-1.27453	DOWN	9.53722	4.85798	10.2143	7.24793	4.08746	7.73471	7.30378	6.10852	8.27612	6.40939	7.98299	10.3859	6.16993	9.4818	8.72792	7.8009	8.38802	9.66888	4.08746	4.39232	8.47168	5.24793	8.03892	5.49185	7.70736	4.85798	8.97154	6.32193	8.58871	6.10852	7.61471	8.87036	7.89482	6.6865	9.60918	6.26679	10.7887	6.22882	8.79116	4.58496	7.52356	9.13186
ACOD1	1.60202	2.10183	5.34062	1.54481e-07	1.39679e-06	6.73752	UP	3.90689	2.58496	3.58496	4.64386	1	3	3	0	2	0	0	0	1.58496	3	0	2	5.08746	1	3.70044	0	0	5.83289	1.58496	1.58496	1.58496	3.70044	0	2.32193	5.93074	1.58496	0	3.32193	0	0	2.58496	0	1.58496	5.83289	1.58496	3.32193	2.32193	5.52356
ACOX2	-1.90236	8.14726	-7.53692	3.15909e-13	9.1434e-12	19.4443	DOWN	6.93074	8.11374	6.04439	8.9571	5.83289	9.35755	8.8009	5.64386	9.32643	5.49185	9.02791	8.08215	5.75489	9.94544	10.3208	8.69697	6.75489	8.68299	9.55075	5.93074	7.24793	8.09803	7.19967	9.29232	10.6384	7.06609	5.12928	5.78136	4.85798	8.67596	8.31741	8.15987	7.19967	7.70044	7.04439	10.3421	6.94251	8.00562	9.17742	8.91289	8.07682	6.61471
ACRV1	1.31156	4.41682	6.11083	2.32308e-09	3.04427e-08	10.7875	UP	3.70044	4.58496	3.70044	6	5.55459	7.02237	5.2854	2.32193	5.20945	3.32193	3	5.24793	4.80735	4.70044	3.16993	4.32193	5.97728	6.75489	6.20945	4.75489	2.80735	5.64386	4.90689	5.80735	5.20945	5.24793	4.90689	2	5.12928	4.32193	4.64386	5.67243	5.39232	4.9542	4.80735	2.80735	6.22882	7.56986	4.08746	4.08746	4.45943	3.70044
ACSL6	-1.40551	6.04626	-4.70759	3.44343e-06	2.31261e-05	3.76499	DOWN	3.70044	7.99435	4.64386	6.04439	5.45943	4.52356	9.74147	4.39232	5.93074	1.58496	6.65821	3.80735	5.45943	9.03617	6.64386	6.20945	7.40939	3.45943	8.30834	3.32193	4.39232	5.67243	4	7.14975	10.8857	4.85798	4.85798	4	4.64386	9.79766	5.72792	8.87652	4.16993	5.42626	5.55459	6.58496	6.44294	7.49185	3.90689	7.53138	6.44294	5.90689
ACSM5	-1.36779	4.48636	-4.92633	1.22142e-06	9.02942e-06	4.75469	DOWN	5.83289	3.70044	5.12928	4.64386	0	4.64386	5.9542	0	4.08746	1	6.61471	3.70044	1.58496	5.39232	6.64386	3.58496	5.72792	3.58496	3	2	3	6.32193	2.32193	5.52356	1	3.32193	3.16993	1	4.58496	6.50779	6.02237	4.24793	4.58496	1.58496	3.90689	5.88264	4	6.49185	4	5	3.32193	5.49185
ACSM6	-1.19352	2.6762	-4.71927	3.2613e-06	2.19548e-05	3.8168	DOWN	0	1	0	4.08746	2.32193	1.58496	4.32193	0	1.58496	1.58496	3.32193	0	1	2	4	2.58496	6.33985	1.58496	3.70044	1.58496	1.58496	5	0	4.64386	2	3.70044	1	1.58496	2	2.32193	3	2.32193	1.58496	1.58496	4.70044	5.16993	3.58496	6.96578	1.58496	4.45943	3.90689	2.80735
ACTA2	-1.32394	13.8598	-4.71123	3.38564e-06	2.27648e-05	3.78113	DOWN	12.9924	14.3391	13.157	14.291	11.236	13.1082	13.8114	11.258	14.1915	11.6096	13.8802	15.2471	13.3376	14.0212	18.2276	11.6658	13.2881	11.5348	12.4189	11.994	12.5263	14.5358	13.791	12.685	11.9575	11.3432	12.2195	12.3312	12.744	15.5846	15.4404	13.0876	14.9058	15.1433	13.1466	18.169	12.2149	10.5137	15.5735	16.5987	14.9453	12.425
ACTBL2	2.22391	3.66601	5.89871	7.71811e-09	9.2024e-08	9.62618	UP	5.39232	3.16993	0	4.80735	4.85798	6.71425	4	4.9542	4.45943	2.80735	0	4.32193	5.04439	1.58496	4.08746	3.32193	3.32193	0	1	2.58496	3.58496	2	8.50779	1	1.58496	5.97728	2.80735	1	2.80735	4.64386	6.61471	1	2	4.24793	2	2.80735	2.80735	2	5.64386	4.08746	3.45943	5.67243
ACTC1	-1.43871	7.55642	-4.05816	5.93261e-05	0.000279233	1.0666	DOWN	7.19967	8.10329	7.66534	6.53916	4.9542	6.6865	4.39232	6.22882	7.53138	5.70044	6.18982	10.0661	5.88264	8.30834	8.54303	4.58496	6.56986	5.45943	7.93074	4.64386	7.29462	10.1636	7.48382	3.70044	6.08746	5.83289	7.22882	6.74147	4.52356	10.0728	7.46761	6.14975	10.23	10.0821	8.46761	13.2663	6.14975	6.16993	9.74819	8.15987	8.93664	7.97728
ACTG2	-2.91667	12.9886	-6.04769	3.33263e-09	4.23075e-08	10.4383	DOWN	10.6537	13.2061	11.6439	15.1494	9.40301	12.0296	8.67596	11.0795	15.0431	11.4939	12.5481	16.8821	10.8595	13.6777	20.2076	9.39232	12.5791	10.2336	10.1724	9.70736	12.5362	13.9231	11.3214	9.48985	9.79604	9.58871	10.4062	12.3567	10.5245	15.2243	12.0478	10.6742	14.0222	14.0514	12.939	20.5386	10.5765	9.92184	16.1018	18.9605	13.4329	11.9069
ACTL11P	1.24062	3.49255	3.76428	0.00019163	0.000803438	-0.0334356	UP	2	2.58496	2	3.58496	5.49185	3	3.70044	4.70044	3.80735	3.45943	2	3	4.58496	2.32193	3.45943	5.04439	4.64386	4.45943	4.70044	3.80735	3.58496	4.45943	5.24793	5.97728	5	3.80735	2.58496	1.58496	2.32193	1.58496	5.90689	4.9542	2.58496	2.32193	6.71425	2.32193	7.74819	6.74147	1.58496	3.90689	3.32193	6.14975
ACTL6B	-1.11726	2.66764	-3.53989	0.000446583	0.00171016	-0.821459	DOWN	0	2.80735	0	4.64386	2.32193	2	4.85798	2	1.58496	0	2	3.16993	0	3.90689	4.32193	1.58496	7.19967	1	2.58496	3	3	6.32193	3.80735	3.16993	0	2.58496	0	2.80735	1.58496	10.2889	2.32193	2.32193	1	2.80735	3.32193	2.32193	3.16993	7.64386	2.32193	4.08746	2.58496	3
ACTL8	2.72405	3.7854	4.84562	1.79847e-06	1.27883e-05	4.38485	UP	0	1	1	7.06609	7.99435	5.32193	0	4.24793	2	4.9542	3.45943	7.42626	6.33985	2.80735	1	2	3.70044	2.32193	9.42417	5.85798	9.68825	3.58496	1.58496	1	6.47573	8.633	0	4.64386	1	3.58496	5.55459	5.16993	2.80735	0	4.52356	2.80735	5.52356	7.5157	1.58496	2	7	3.32193
ACTN2	-2.29871	4.98012	-5.42764	9.83534e-08	9.29698e-07	7.17175	DOWN	3.32193	6.08746	5.24793	6.18982	7.10852	4.58496	5.39232	2	6.04439	1.58496	3.16993	8.26209	4.16993	3.58496	5.08746	5	7.11894	4.80735	5.32193	1	3.70044	8.52748	3	4.45943	2	4.58496	3.32193	2	3.16993	8.57743	5.88264	2	5.93074	5.83289	2.58496	11.7952	3.16993	8.09803	7.98299	7.02237	4.90689	4.16993
ADAD2	-1.04146	2.45774	-3.42024	0.000688962	0.00250855	-1.22303	DOWN	1	3.90689	0	3.45943	2	2.32193	4.85798	2.58496	4.24793	2	4.08746	2	1	4	2.32193	1	3.16993	2.58496	1	2	1	2.80735	2	4.24793	0	0	1	4.39232	1	2	4.32193	1.58496	2	0	3	1.58496	2	3.80735	2.58496	2.32193	6.18982	3.45943
ADAM12	3.33394	9.41938	11.4093	2.39388e-26	9.28282e-24	49.0671	UP	7.15987	12.3619	9.88111	12.4579	9.55651	10.3902	9.76653	5.67243	10.3729	6.32193	8.84235	10.6839	11.8853	9.40514	12.7977	8.50383	9.82814	6.14975	9.9263	8.93958	6.44294	8.2384	9.92481	7.47573	8.93369	7.96578	5.90689	5.90689	11.4767	11.0341	10.1497	11.6069	9.98868	12.3851	8.24793	8.31741	8.01123	8.59619	10.2586	7.82655	14.0909	8.27612
ADAM33	-2.18873	8.11125	-6.16423	1.70808e-09	2.30381e-08	11.0853	DOWN	5.16993	9.16993	5.75489	9.24079	7.69349	9.05799	10.2981	5.90689	9.66	5.2854	9.47573	9.03892	8.28077	9.36194	12.9674	4.80735	7.88874	4.39232	6.83289	4.45943	7.89482	9.10591	7.49185	8.25267	5.39232	5.83289	4.90689	6.58496	1.58496	9.61471	9.74987	8.03892	7.06609	8.99152	7.2854	11.4671	6.67243	7.45121	8.51175	10.5897	10.5108	7.83289
ADAM8	1.50315	10.6331	7.13323	4.52316e-12	1.03105e-10	16.8498	UP	12.5587	11.0954	10.0607	11.014	10.332	11.0154	12.826	9.12153	10.1331	8.66178	10.5736	9.48382	10.9564	11.9012	9.38802	10.749	12.1121	10.9204	9.21917	9.2384	10.7977	10.102	9.37721	12.3435	11.0855	10.0154	11.6421	9.39446	12.0738	10.933	13.0133	10.3542	11.3281	10.7339	9.48382	8.98584	11.4645	9.33762	11.9944	7.74147	11.6667	11.03
ADAMDEC1	2.16523	8.85806	6.60847	1.22096e-10	2.1e-09	13.6442	UP	11.8134	10.1137	10.0967	11.0314	5.16993	8.97441	10.7944	6.04439	9.86573	7.13955	10.1408	8.74147	9.20701	11.1306	6.90689	9.09011	10.0126	8.00562	6.87036	5.9542	8.90689	9.16491	7.56986	7.94251	9.48583	9.7879	6.79442	6.49185	12.1003	10.6777	10.0967	9.79279	7.90087	9.03342	8.82972	8.40939	9.23601	6.22882	8.62571	7.30378	9.01402	10.7952
ADAMTS1	-1.70069	11.3184	-7.37671	9.20163e-13	2.40242e-11	18.4016	DOWN	9.51175	10.9936	10.6564	11.5083	9.07146	11.7364	13.3245	9.40514	11.2946	9.32193	12.5006	11.3745	11.0512	11.9233	14.0556	8.83605	12.6214	9.17742	7.88264	9.24555	10.8773	9.98584	11.3219	10.1072	9.633	10.3891	8.45943	9.62571	11.403	13.2868	12.2868	11.7104	11.5319	12.7217	12.7632	12.2877	10.6564	8.37504	11.5845	9.5157	13.6683	11.0647
ADAMTS12	3.10042	10.1469	12.0431	8.925e-29	6.09114e-26	54.5661	UP	10.2819	12.6362	10.544	12.7795	10.1548	10.9744	9.73809	6.80735	12.0993	7.72792	7.74147	11.1699	12.431	11.9005	11.5831	9.41151	10.8533	8.11894	10.0182	9.29232	7.12928	9.11894	12.4996	11.3891	10.2143	7.72792	7.73471	8.53138	11.2854	13.1937	11.4594	11.6729	10.7082	12.989	8.86728	9.81858	8.73132	8	10.2726	8.67596	13.5593	8.15482
ADAMTS14	2.42483	9.0136	11.4845	1.24254e-26	5.30007e-24	49.7118	UP	8.31741	10.3432	7.71425	9.94251	12.8025	9.41151	9.23601	7.66534	10.1861	7.97154	9.53722	9.43045	10.7125	10.0334	10.3421	8.36632	9.17742	7.52356	8.76155	9.23122	7.20945	8.65821	10.0417	8.99152	9.21675	8.25739	7.04439	6.55459	9.31061	10.5699	10.9823	10.1687	8.46761	10.5294	8.224	8.03892	8.70736	8.02237	8.94837	7.55459	12.3343	8.86728
ADAMTS15	-1.67109	7.87689	-5.63247	3.32081e-08	3.4846e-07	8.21756	DOWN	6.32193	8.48784	5.2854	9.07414	9.01123	8.62205	8.31741	7.62936	9.33316	7.30378	8.94544	8.3966	10.3106	10.1072	11.647	6.91886	7.70736	5.42626	7.33092	9.31515	6.40939	6.10852	10.0901	7.82655	9.08481	6.12928	3	6.6865	4.45943	8.29462	10.196	10.1007	8.47168	7.56986	9.85175	8.36632	9.67419	6.83289	6.04439	5.42626	7.19967	7.14975
ADAMTS18	2.53644	5.2244	9.09417	4.27158e-18	3.20359e-16	30.4107	UP	3.80735	5.42626	3.32193	7.70736	3.45943	6.70044	6.56986	1	6.72792	1.58496	4.85798	5.35755	4.90689	5.49185	8.17991	5.39232	7.27612	2.32193	5.52356	2.58496	4.70044	7.17991	3.70044	6.32193	3	2.58496	3.90689	2.32193	3.16993	5.35755	7.18982	3.90689	3.70044	6.89482	5.52356	6.12928	5.04439	6.97728	6	6.74147	5.45943	4.9542
ADAMTS2	2.37043	11.4763	9.56852	1.07102e-19	1.03829e-17	34.025	UP	11.8313	13.6018	12.6006	14.7064	10.4686	12.3778	12.0238	7.8392	13.284	8.32193	10.2228	12.3894	14.2113	13.006	13.3841	10.0821	11.6604	7.91289	11.3242	10.6221	8.52748	10.2167	13.4182	12.0403	11.1267	9.02514	9.32867	8.58496	12.9746	14.52	13.1069	13.6588	11.1948	13.2899	10.3826	10.6573	10.0098	8.5157	11.4435	10.0498	15.132	10.5613
ADAMTS20	1.62341	2.25037	3.93655	9.72295e-05	0.000435987	0.60211	UP	0	4.16993	0	5.80735	5.64386	8.37938	3.90689	1.58496	0	0	0	2.80735	3.32193	0	0	3.80735	6.42626	5.58496	4.52356	0	4.39232	6.83289	0	6.71425	0	4.85798	2.32193	1.58496	0	1	5.20945	1	1	5.83289	4.39232	1.58496	3.16993	8.51964	1	4.80735	5.49185	0
ADAMTS6	1.20781	7.61239	6.26929	9.27072e-10	1.33426e-08	11.6773	UP	6	7.01123	6.6865	8.94544	7.71425	10.2644	9.69697	4.75489	10.4858	4.9542	6.62936	8.03342	8.47168	7.86419	9.3015	5.90689	8.02791	6.74147	6.96578	5.32193	6.08746	9.53916	8.47978	11.6452	6.02237	7.09803	8.8009	4.90689	7.90689	8.55459	9.08215	8.27146	7.77479	9.15228	7.48382	9.75822	6.14975	9.61655	6.93074	7.2854	10.2562	7.41785
ADAMTS7	1.11743	9.55193	6.4535	3.11445e-10	4.95929e-09	12.7351	UP	8.97441	10.9744	9.32643	11.5675	9.00562	10.3576	9.80896	8.69697	10.4898	8.55459	8.53916	9.04712	10.7764	9.86728	11.2479	7.59991	9.49586	8.10852	8.43045	8.75489	8.69697	8.81378	10.5934	9.10852	8.56605	11.4189	6.72792	6.64386	10.4284	11.5774	9.94837	10.0553	9.24793	10.4273	10.0901	9.37721	9.03342	7.64386	10.0755	8.22882	12.7271	9.25974
ADAMTS8	-1.82896	7.40874	-4.80785	2.15164e-06	1.50518e-05	4.21362	DOWN	6.42626	9.05528	7.05528	9.40301	3.45943	8.25267	6.79442	5.04439	7.71425	7.62205	7.77479	11.4051	6.32193	8.45533	11.0607	7.05528	7.52356	6.45943	4.9542	6.12928	6.04439	7.33092	5.2854	6.75489	3.32193	7.29462	4.52356	5.93074	3	10.1447	7.96578	5.42626	9.90839	8.85487	7.12928	12.3853	7.25739	6.82018	8.02237	8.43879	5.55459	6.75489
ADAMTS9-AS1	-1.92658	4.90214	-7.12189	4.86685e-12	1.10277e-10	16.7784	DOWN	2.32193	3.90689	2.80735	5.90689	3.45943	5.2854	6.98868	4.39232	5.24793	3.32193	5.49185	6.2854	3.90689	3.90689	8.31288	3.70044	6.33985	4.16993	4.85798	3	5	5.12928	5.2854	3.32193	2.58496	3.16993	2	1.58496	3.80735	5.2854	6.55459	5.49185	4.52356	6.04439	5.72792	7.45943	3.58496	5.61471	5.20945	4.75489	7.83289	4.64386
ADAMTS9-AS2	-2.14877	5.57222	-7.77361	6.3167e-14	2.05287e-12	21.0155	DOWN	3.32193	4.70044	3.90689	6.70044	3.16993	5.97728	8.14466	4.16993	6.30378	2.32193	5.49185	7.14975	4.08746	5.88264	9.84862	5.04439	7.34873	2.80735	5.64386	2.32193	5.32193	6.97728	4.90689	4.80735	2.58496	3.45943	4.08746	4.90689	3.32193	6.55459	7.49985	3.32193	5.61471	6.6865	5.80735	9.69349	4.39232	7.46761	5.24793	7.15987	5.88264	5
ADAMTSL1	-2.17014	8.43998	-9.90139	7.53e-21	9.20981e-19	36.6302	DOWN	7.33092	9.39232	7.36632	9.224	6.18982	9.3443	10.403	5.85798	9.03067	6.02237	9.27845	7.91289	8.30378	9.84078	10.1812	7.40939	8.9571	5.83289	6.45943	7.70044	7.91886	7.40088	7.08746	8.04439	5.97728	8.04985	5.83289	6.71425	8.31741	9.50978	8.17493	8.29002	7.35755	9.85175	7.65821	9.48985	7.67948	8.9571	8.07682	8.93369	10.3696	8.07682
ADAMTSL3	-1.82141	8.18841	-6.14773	1.8788e-09	2.5142e-08	10.993	DOWN	6.87036	7.74819	7.33985	8.55459	5.20945	8.01123	11.3576	7.89482	8.07682	5.20945	9.72792	8.87036	7.18982	9.55075	11.3815	5.90689	8.91289	4.80735	5.42626	3.16993	7.07682	8.81057	6.96578	8.04985	4.85798	6.88264	6.53916	6.96578	5.12928	10.2432	8.64024	5.45943	7.69349	9.5411	7.53138	10.9061	7.29462	7.02237	8.65821	9.62571	7.93074	7.81378
ADAMTSL4	-1.24481	10.0358	-5.60385	3.87234e-08	4.01885e-07	8.06943	DOWN	8.7039	10.2384	9.1472	11.1196	8.49985	10.043	10.9751	7.73471	9.78136	7.33092	10.2119	9.35755	12.3912	10.2609	11.8696	7.73471	8.99718	7.62205	7.40939	6.35755	8.70736	8.84235	11.6618	9.39232	7.29462	10.0539	9.73978	9.64566	10.6165	11.676	10.8447	9.44501	8.84549	9.70563	9.70044	11.5058	10.1886	8.60733	9.16491	8.26679	12.5491	9.73471
ADAP1	1.25816	11.0923	6.78368	4.14964e-11	7.95073e-10	14.6929	UP	11.1867	10.545	10.9715	10.3945	11.0566	13.1734	11.5058	8.82972	12.3669	11.9259	10.9315	11.9028	10.0566	11.7773	10.2216	10.4294	11.463	10.8416	12.0399	11.4367	11.6711	12.6398	11.5755	11.7908	11.672	9.8933	11.7172	8.90989	12.0053	12.5479	11.7985	12.4615	11.3404	10.5353	12.4265	10.1497	12.4979	11.4236	11.8757	9.15482	10.6027	11.2597
ADARB2	-1.53932	5.04317	-5.10225	5.16136e-07	4.15588e-06	5.5795	DOWN	0	5.08746	6.56986	5.49185	1.58496	5.12928	3.90689	3.45943	4.75489	2.32193	5.90689	5.04439	7.53138	5.85798	5.72792	4.80735	7.32193	3.45943	3.58496	1.58496	3.80735	5.04439	4.90689	7.01123	3.80735	5.08746	3.58496	4.90689	0	6.76818	6.10852	2	4.08746	4.58496	4.80735	4.58496	3.32193	7.20945	4.58496	5.75489	6.40939	5.64386
ADAT2	1.13296	9.10053	7.00781	1.01155e-11	2.17095e-10	16.0661	UP	8.35755	6.97728	8.30834	9.61655	10.6537	10.8033	9.95274	8.61839	10.1007	8.89482	7.74147	9.7039	9.44501	9.66178	9.23122	10.1215	9.31061	8.3443	10.0042	9.83605	8.56986	9.77808	9.72451	12.4617	10.014	9.14211	9.15735	7.64386	9.97298	8.84549	9.09803	10.6847	9.59991	8.3443	9.21189	9.34207	10.7356	11.6092	6.87036	7.90689	8.58496	9.224
ADCY2	-1.62564	7.02065	-5.02404	7.5929e-07	5.88864e-06	5.20965	DOWN	5.45943	10.9166	5.83289	8.89178	3.58496	6.16993	6.79442	4.45943	8.17991	4.80735	5.04439	7.69349	11.5013	8.01681	12.0818	5.67243	8.34873	3	7.2384	4	5.12928	6.83289	6.47573	10.3498	4.90689	2.32193	4.58496	5.39232	5.2854	8.77479	6.59991	6.6865	6.82018	8.17991	6.49185	9.87958	5.80735	8.47168	7.66534	10.1241	8.19967	5.08746
ADCY5	-2.21061	9.45237	-6.03308	3.62139e-09	4.57352e-08	10.3579	DOWN	7.42626	9.77314	9.40514	9.62205	9.52943	10.1497	10.5784	7.12928	10.1523	7.02237	9.92184	11.4284	8.47573	10.4778	13.7057	5.93074	9.55267	5.20945	5.88264	5.24793	7.88264	11.1824	7.62936	11.8297	5.61471	9.68124	8.54303	8.15987	4.75489	13.2805	9.82814	7.56986	10.2384	11.825	8.82655	14.1165	7.8392	8.08746	10.4645	11.5637	9.69697	8.61102
ADCYAP1	-1.8181	4.95878	-4.5758	6.31045e-06	3.65165e-05	3.18813	DOWN	3.32193	6.6865	4.32193	6.32193	1	6.2854	7.27612	2.58496	2.58496	3.58496	7.37504	7.05528	5.80735	6.02237	9.03067	3.70044	6.9542	0	3.45943	0	7.76818	5.49185	4.08746	3.32193	2.58496	3.80735	1	1.58496	0	7.94837	5.32193	2.80735	3.90689	5.9542	3.70044	7.79442	4.39232	6.47573	6.37504	3.58496	6.62936	6.20945
ADCYAP1R1	-3.36618	4.55015	-8.88017	2.16673e-17	1.44692e-15	28.8196	DOWN	2	6.08746	4.16993	5.49185	2.80735	2.58496	7.22882	2.32193	4	2	6.58496	6	3.90689	6.26679	8.3443	2	6.12928	0	3	1	3.70044	5.2854	3.32193	3.45943	1	7.22882	0	3.45943	1	7.08746	4.90689	3	4.64386	5.64386	2.32193	6.52356	1.58496	7.26679	5.35755	5.52356	5	4.75489
ADGRB3	-2.34896	4.6468	-6.81664	3.37919e-11	6.60054e-10	14.8926	DOWN	2	6.42626	3	6.89482	2.32193	4.90689	7.20945	2	4.64386	3.70044	5.49185	6.76818	4.90689	6.58496	9.32418	2.32193	6.18982	1	3.32193	2.32193	4.64386	5.49185	2.80735	3.80735	3.32193	2	0	3.32193	2.32193	6.49185	6.30378	3.58496	5.04439	6.35755	3.70044	7.79442	1.58496	6.47573	4.80735	6.97728	5	2.80735
ADGRD1	-1.307	8.49481	-4.12189	4.55657e-05	0.000219803	1.31525	DOWN	7.04439	10.3891	6.72792	11.5367	9.33762	10.0553	9.783	5.83289	9.17991	6.35755	9.53916	8.38802	8.31741	9.56415	12.3086	6.75489	8.28077	3	5.64386	5.04439	6.83289	7.35755	6.49185	11.4205	6.70044	8.53528	5.78136	6.10852	10.2228	10.2842	9.47371	6.24793	6.75489	8.36632	7.70044	10.5971	7.82018	8.56605	8.21917	9.9263	11.1997	7.22882
ADGRD2	1.07009	2.79358	3.76815	0.000188786	0.000793173	-0.019464	UP	0	1	1	1.58496	4.32193	4.45943	3.58496	2.32193	2.80735	1	1	6.6865	7.08746	3.80735	2.80735	3	5.72792	3.16993	5.32193	2.80735	1	4.24793	2	4	1.58496	2.80735	2.58496	2	0	4.52356	4.32193	2.32193	3.16993	1	3.45943	2.32193	2.32193	6.53916	1	3.90689	2.58496	2.58496
ADGRE2	1.18153	8.81678	5.54005	5.44188e-08	5.44571e-07	7.74156	UP	8.94544	9.87191	9.04439	10.7912	6.6865	9.25739	9.16742	5.88264	9.13443	6.80735	8.08746	8.45121	10.6636	9.224	8.77149	8.24317	8.99435	7.2384	7.60733	7.94251	7.40088	8.15482	9.92184	7.08746	8.81698	9.44501	8.42206	6	11.3526	9.37504	8.64746	9.29232	7.59991	10.5098	8.81057	7.65105	8.96578	9.08746	8.2854	6.85798	11.6852	10.3696
ADGRF2	1.10388	3.21495	2.72456	0.00671661	0.0186431	-3.29725	UP	3.32193	2	4.58496	6.42626	1	3.45943	2	2	5.88264	0	1	1	3.45943	1.58496	2	2.32193	5.39232	5.83289	2	0	5.58496	4.24793	5.45943	4.32193	2.32193	3.58496	3.45943	3.90689	6.18982	4.08746	6.35755	1	6.08746	5.08746	4.32193	1	1.58496	6.10852	3.58496	4.64386	1.58496	2
ADGRF4	2.38539	6.2024	5.07277	5.97319e-07	4.73843e-06	5.43949	UP	9.41996	5.04439	5.58496	9.09276	5.9542	9.41363	4.80735	5.61471	10.5285	2.80735	5.08746	7.33092	6.71425	5.24793	6.55459	8.81378	4.70044	6.82018	8.38802	4.24793	5.67243	6.56986	10.8321	7.90689	8.64386	5.08746	6.26679	8.55459	6.50779	9.72622	9.7364	8.93369	7.47573	7.90087	3.90689	4.52356	3.32193	8.40939	6.87036	7.35755	5.61471	6.59991
ADGRG1	1.18925	13.2729	6.48421	2.59054e-10	4.18756e-09	12.9139	UP	13.8493	13.4282	11.9936	13.8295	15.425	15.8891	13.4982	12.0461	14.1645	13.1504	12.5691	12.2369	15.3067	13.9028	11.9575	13.5027	13.1036	13.4151	14.7693	12.4615	13.4883	13.6114	14.3184	15.3436	12.8865	11.5498	14.2537	12.6332	14.2599	13.226	14.681	13.0908	13.6164	13.1861	12.3966	11.9719	14.2434	12.2506	13.6482	10.5324	13.6221	13.098
ADGRG2	-1.37597	6.76471	-5.24019	2.582e-07	2.22383e-06	6.24402	DOWN	3.58496	5.52356	4.64386	7.48382	10.2923	5.61471	10.6909	5.2854	6.96578	4.75489	7.65821	4.80735	9.47776	10.1762	8.09803	5.85798	8.59619	4.80735	5.58496	5.20945	7.08746	5.78136	4.85798	6.75489	4.58496	4.9542	3.58496	5.35755	5.16993	6.61471	6.85798	6.76818	4.90689	8.81698	6.20945	7.93074	9.65821	6.88264	5.9542	6.64386	8.26209	6.50779
ADGRG4	-3.15846	2.19014	-9.12402	3.3991e-18	2.60654e-16	30.6346	DOWN	1	4.64386	0	0	0	0	3.70044	0	1	0	5.32193	1	2.58496	1.58496	4.9542	2.58496	5.58496	0	2	0	0	4.16993	5.55459	3.58496	0	1	0	0	0	2.32193	2.32193	0	1.58496	4	3.80735	7.88874	0	5.80735	0	4	2	0
ADGRG5	1.00963	9.10404	4.61909	5.18011e-06	3.05612e-05	3.37597	UP	8.35755	9.97585	9.49985	10.7474	10.3151	10.5784	11.3404	7.8009	9.54689	8.33539	9.79604	9.71768	8.38802	10.2033	7.85798	8.73809	9.76321	8.30834	7.71425	10.3977	8.68299	8.32643	10.3685	12.5481	8.91886	9.37287	9.03892	7.45121	8.21917	8.23362	8.24317	10.7624	8.48382	8.72451	9.23122	8	10.1241	9.57932	8.08215	8.20945	8.25267	9.62571
ADGRG7	1.36955	7.73185	2.49225	0.013091	0.0331663	-3.88921	UP	11.7678	7.25739	4.85798	7.42626	5.08746	12.4086	9.30834	4	10.6202	9.23362	9.6987	9.30834	5.16993	9.87805	5.12928	11.1351	6.08746	12.3103	6.67243	6.55459	6.16993	5.75489	9.04439	8.49185	11.5727	8.82018	7.08746	4.85798	8.05528	8.93074	4.75489	11.8846	11.2574	6.26679	11.0492	6.02237	7.83289	10.8688	10.2889	9.78627	5.85798	10.5304
ADGRL3	-1.62404	8.07143	-5.77141	1.56108e-08	1.74371e-07	8.9458	DOWN	7.42626	8.30378	6.16993	8.29462	6.74147	9.63118	9.46557	6.91886	8.29462	7.5157	7.45943	6.59991	6.45943	9.59991	9.65642	7.41785	8.78136	8.33539	4.58496	7.21917	8.17991	8.27612	7.60733	9.27146	6.35755	8	6.33985	7.53138	2	8.86728	9.41151	4.9542	8.18982	7.52356	10.2761	9.66	8.93664	7.99435	5.67243	7.45121	7.89482	9.02237
ADH1A	-1.21624	3.29731	-2.85539	0.00451868	0.0132164	-2.9415	DOWN	6	4.24793	8.64024	3	1	3	6.97728	2.58496	1.58496	6.98868	5.04439	0	1.58496	3.16993	4.08746	1.58496	4.58496	2	0	4	0	1.58496	1.58496	4.16993	0	5.52356	0	3.16993	0	2.32193	2.58496	1.58496	0	4.90689	2.58496	3.32193	6.42626	4.08746	1	3.16993	1.58496	3.45943
ADH1B	-4.18471	8.70491	-8.07422	7.7737e-15	3.08224e-13	23.0624	DOWN	6.87036	8.27612	6.06609	8.74483	1	10.0417	13.4172	7.25739	9.7364	9.53333	12.6893	10.1611	8.53138	10.7764	13.7192	3.90689	9.31288	3.80735	2.80735	8.86728	9.64566	5.55459	4.52356	8.45121	3.16993	9.22159	6.67243	10.5245	0	10.3376	10.3343	4.24793	7.7879	6.35755	8.49185	11.6804	9.04166	5.39232	6.71425	11.6484	4.75489	10.021
ADH1C	-1.97933	10.0008	-3.5581	0.000417621	0.00161082	-0.759211	DOWN	11.0614	8.91886	10.8494	6.40939	4.75489	11.9046	13.0515	12.5098	9.23362	14.2494	10.9723	4.24793	6.50779	13.5671	7.06609	6.02237	12.2306	12.1411	9.65105	12.6662	10.1241	9.39232	3.70044	9.39874	8.76487	11.0715	10.5108	10.102	4.24793	10.0126	12.2842	9.27612	10.66	7.88264	13.4486	7.64386	11.719	9.79279	12.5218	5.97728	10.9958	13.5725
ADH4	-2.10372	5.59261	-3.73273	0.000216401	0.000894762	-0.146988	DOWN	7.65821	6.79442	3	5	4.32193	5.75489	9.44708	4.45943	3.32193	2.80735	12.3151	1.58496	3.90689	6.37504	8.51964	3.70044	4	9.90539	3.16993	5.58496	2	4.85798	1.58496	5.52356	3.58496	3.80735	2.32193	1	0	3.58496	3.58496	5.49185	1.58496	6.42626	3.80735	5.04439	7.35755	7.76818	1	4.80735	3	5.64386
ADH7	-5.91162	2.87323	-10.6887	1.14649e-23	2.47613e-21	43.0012	DOWN	4.08746	0	0	0	1.58496	0	0	5.64386	0	2.32193	0	1	0	7.26679	0	0	4.24793	1	0	1.58496	2.32193	3.58496	0	0	1.58496	2	0	10.5187	0	2.32193	0	0	3.70044	0	1	0	5.49185	4.45943	1	3.80735	7.27612	0
ADHFE1	-2.55573	6.29057	-10.7558	6.51427e-24	1.5122e-21	43.5566	DOWN	3.90689	4.39232	4.39232	5.97728	6.26679	5.80735	7.8392	6.55459	5.78136	4.32193	6	7.45943	5.20945	7.42626	9.09276	5.55459	7.07682	4	5.08746	5.72792	5.67243	7	4	5.32193	2.58496	7.74147	4.64386	7.15987	4.24793	6.6865	6.79442	5.55459	4.52356	6.87036	4.90689	9.76487	6.78136	8.31741	5.64386	8.19967	6.67243	6.64386
ADIPOQ	-4.26286	2.63768	-8.41957	6.54578e-16	3.30426e-14	25.4826	DOWN	1.58496	4.52356	1.58496	2.80735	1	5	6.18982	1	3.70044	1.58496	9.01123	1.58496	3.32193	1	12.9416	1.58496	5	0	2.32193	0	1	4.90689	1.58496	1.58496	1	0	1	2.32193	1	6.39232	7.46761	1	4.08746	0	2.58496	1	1.58496	5.88264	1	1	2	1
ADIRF-AS1	-1.25949	7.20665	-5.7653	1.61423e-08	1.79485e-07	8.91348	DOWN	5.52356	8.32643	4.32193	6.42626	7.2384	9.32418	8.67596	6.20945	7.37504	6.6865	6.90689	5.85798	5.35755	7.77479	7.80735	5.2854	8.33985	4.58496	8.96	6.67243	7.65821	6.91886	7.98868	6.26679	6.33985	7.39232	7.55459	6.45943	8.9629	7.98868	8.40939	5.67243	6.24793	8.10329	7.67948	7.57743	8.78136	7.92481	6.65821	7.12928	7.73471	9.10852
ADRA1A	-1.90445	3.91989	-7.47247	4.8662e-13	1.34566e-11	19.0229	DOWN	0	4.32193	2.58496	4.9542	1	2.32193	7.53916	1.58496	2	1	5	2	3.90689	5.80735	6.88264	3	5.83289	2.32193	4.24793	3.32193	3.58496	5.85798	2.32193	2.58496	1.58496	4	3.45943	2.80735	1.58496	4.9542	6.08746	2.32193	4.24793	2	5.45943	5.24793	4.70044	5.70044	1	4.08746	2.80735	4.75489
ADRA1D	-1.39584	5.82304	-3.73842	0.000211719	0.000877316	-0.126564	DOWN	2.32193	5.2854	5	5.24793	8.93074	5.58496	5.35755	5.12928	6.90689	2	6.14975	6.58496	3.45943	4.70044	8.37069	2	6.20945	8.24317	4.80735	2.32193	4	6.06609	8.53528	8.69697	0	3.58496	5.32193	2.32193	5.04439	7.97154	6.02237	4.24793	6	6.22882	5.55459	9.66534	5.45943	6.82018	7.24793	7.88874	5.16993	3.16993
ADRB2	-2.75558	6.495	-10.5057	5.30878e-23	1.00643e-20	41.4955	DOWN	6.18982	6.49185	4.9542	7.03342	5.16993	6.24793	8.53916	7.59246	5.64386	4.45943	8.22882	6.40939	5.16993	8.29921	8.94837	4.45943	6.65821	4	5.75489	4	6.44294	4.80735	3.58496	4.32193	3	4.24793	4.75489	7.33092	5.32193	7.59991	6.9542	5.16993	5.75489	5.9542	5.78136	8.44708	6.75489	4.85798	5.52356	7.18982	6.06609	6.85798
ADRB3	-2.78026	3.23514	-7.745	7.68766e-14	2.46323e-12	20.8237	DOWN	0	4.16993	2.32193	4.32193	1.58496	0	3.16993	1.58496	3.58496	2.80735	2.80735	6.47573	0	4.85798	7.59246	2.80735	5.93074	1	1	1.58496	2.32193	6.12928	2	0	0	2.32193	2	2.80735	3.90689	5.08746	2.32193	2	4.75489	4.39232	2.58496	8.02791	2	5.39232	5.35755	4.08746	3.45943	3.70044
ADTRP	-1.21899	8.69264	-2.84383	0.00468251	0.013636	-2.97358	DOWN	9.98868	8.83289	6.94251	10.1849	5.24793	11.5684	9.89633	7.99435	7.11894	4.85798	10.0042	8.77808	5.83289	10.8273	7.08746	11.6978	10.3696	11.3231	6.67243	7.18982	8.40088	10.3208	11.2889	7.20945	12.0741	9.89936	12.1036	8.33092	5.04439	6.67243	7.91289	11.5048	7.19967	6.71425	12.0314	6.26679	9.9263	10.6175	11.4919	8.14975	7.55459	10.1573
AFF3	-2.50799	7.64926	-7.9056	2.53508e-14	8.94594e-13	21.9073	DOWN	5.39232	7.33092	6.26679	7.90087	3.32193	5.80735	12.3802	6.12928	6.91886	5.80735	10.3554	7.9542	7.90087	9.77149	9.36413	6.32193	10.062	5.75489	5.70044	5.08746	6.91886	8.65464	5.83289	7.62205	4.9542	8.08215	5.12928	7	10.4929	8.29921	7.16993	8.48784	7	7.41785	8.07146	11.2837	8.50779	9.31967	6.58496	9.08481	8.12412	8.32193
AGAP11	-1.46323	2.31736	-5.33436	1.59538e-07	1.43716e-06	6.70656	DOWN	0	0	0	2	0	3.58496	4.52356	3.45943	3.16993	1.58496	1	1	2	2.80735	2.58496	1	4	0	2.58496	2.58496	4.24793	2.58496	1.58496	1	1.58496	1	1	1.58496	5.70044	3	4.70044	1.58496	0	3.32193	3.16993	4.45943	5	4.75489	2	2.32193	2.80735	3.16993
AGBL2	1.4121	6.46589	7.0168	9.55203e-12	2.05909e-10	16.1219	UP	5.61471	3.32193	6.18982	8.01681	7.78136	6.79442	8.73132	5.49185	7.06609	4.90689	4.45943	6.87036	5.85798	5.88264	6.06609	7.60733	8.71768	5.97728	7.08746	3.16993	6.18982	8.02791	7.97154	8.39232	5.61471	6.59991	6.26679	5.20945	7	4.90689	6.9542	7.24793	4.08746	6.20945	6.80735	5.52356	8.62571	9.39017	6	5.64386	5.90689	6.16993
AGMAT	1.79616	10.1207	7.07687	6.50288e-12	1.43814e-10	16.4962	UP	10.2276	9.28771	9.43879	10.8494	10.1712	12.0604	9.89633	7.37504	11.7948	11.4954	10.9114	11.0286	8.80413	11.3415	8.82972	10.1434	9.76984	11.279	11.7474	11.5939	9.76487	9.88264	10.8345	12.0004	11.6036	10.9549	10.021	7.70736	8.58496	10.3309	9.2384	11.7723	10.7557	8.82655	10.2597	7.90689	11.0231	11.6904	9.91588	7.90087	8.43045	9.49185
AGR2	1.77977	15.3339	4.15902	3.90123e-05	0.000191108	1.46173	UP	16.3445	14.4628	13.7894	9.29462	9.91139	16.3184	15.3368	16.8879	18.1619	18.193	15.4438	16.535	15.3506	16.8576	14.7151	16.2137	16.5328	17.5589	14.5674	16.8454	16.9149	15.7435	17.2812	15.9275	17.4971	14.0567	18.404	15.0456	13.2402	13.1611	13.7661	15.5716	16.8088	18.1921	18.3519	14.0606	18.9621	14.4892	15.9042	12.3412	16.0057	16.3575
AGR3	1.47472	10.4152	2.95385	0.00332069	0.0100832	-2.66322	UP	9.47371	8.81378	9.27612	4.52356	5.64386	13.1575	11.7503	10.0715	13.6382	11.0471	11.8226	12.446	6.6865	11.2639	10.5651	12.7881	12.6439	13.1482	8.17493	12.0112	12.3603	11.9366	14.4634	10.7515	13.2102	8.14466	14.4241	10.5382	8.85175	5.04439	6.08746	12.0563	12.1944	10.6874	14.2356	10.4398	12.2787	11.5994	9.71425	9.67596	10.236	9.94398
AGRN	1.59572	14.2622	9.51197	1.67215e-19	1.55902e-17	33.588	UP	14.7554	14.0742	14.0731	14.5384	14.6231	16.015	15.4497	13.7293	14.893	13.5402	12.476	14.3202	16.972	14.2996	13.8166	12.8736	14.7441	14.0515	15.1266	14.7437	13.9419	14.3782	15.0626	14.0001	12.8523	14.5057	13.7258	14.0038	14.7228	15.2188	16.3211	14.041	13.9684	15.3238	14.9002	13.1475	15.5339	12.2744	14.3594	11.628	14.8289	14.3682
AGT	1.44392	10.6564	4.33448	1.84398e-05	9.702e-05	2.17022	UP	10.944	16.4906	7.90087	12.8992	7.15987	12.2811	11.9894	8.10852	12.3786	11.4398	12.1743	11.2877	8.91289	12.681	12.164	10.1459	10.9196	11.9133	10.1202	10.585	9.90087	10.2396	10.2527	16.094	11.4615	11.8313	8.70736	8.26679	4.90689	11.9758	12.6555	9.79279	10.3354	10.933	12.8299	11.3231	11.2324	11.9035	10.4252	11.3129	9.91588	10.8297
AGTR1	-2.87474	5.21524	-6.18983	1.47285e-09	2.01603e-08	11.2288	DOWN	2	5.93074	4.16993	7.76818	1	5.49185	5.67243	2.58496	6.90689	1	6.10852	7.49985	5	4.58496	11.3581	2.32193	5.58496	0	4.24793	1.58496	4	7.5157	1	7.62936	2	5.64386	0	3.58496	4.75489	6.71425	6.08746	4.16993	6.71425	7.31288	1	10.3608	2.58496	5.20945	6.97728	9.22641	6.72792	2.58496
AGTR2	-1.56731	1.30171	-4.66435	4.20717e-06	2.53336e-05	3.57408	DOWN	0	0	2.32193	0	0	0	2	0	2	0	4	1	0	0	5.83289	0	3	0	0	0	1.58496	0	0	8.90689	0	1	0	2	1	3.58496	1.58496	0	2.80735	0	0	7.03342	0	2	1	2	0	0
AIDAP2	1.13377	4.52634	4.63038	4.91885e-06	2.92067e-05	3.42524	UP	2.58496	3.70044	2.32193	4.08746	4.90689	7.2854	6.14975	2.58496	6.24793	1	4.70044	4.32193	4.45943	4.24793	5.61471	5.70044	3.80735	3.58496	3.80735	5	4.08746	4.58496	6.67243	5.16993	6.56986	5.45943	1	3.45943	4.24793	3.70044	7.20945	4.75489	5.08746	3.80735	4.70044	5.24793	3.45943	7.2854	4.64386	5.67243	5.04439	4.58496
AIF1L	-1.44529	8.9491	-5.37371	1.30201e-07	1.19564e-06	6.90192	DOWN	5	8.8392	5.67243	9.58496	10.3641	10.0182	8.61471	6.2854	8.17991	8.40939	10.2992	9.57554	8.85175	9.3443	10.2216	6.02237	8.33092	6.49185	10.0417	10.2854	7.98868	9.43879	10.0056	8.69349	8.7039	10.014	8.53916	7.8009	4.64386	9.82177	10.6357	6.82018	9.01681	9.62388	7.72792	10.4242	9.66178	7.80735	9.46148	6.56986	8.16993	8.56605
AJUBA	1.67234	10.3861	8.5796	2.03076e-16	1.119e-14	26.6281	UP	11.8277	8.62205	11.2258	11.9961	12.1196	12.1328	10.703	7.60733	12.2411	9.98726	7.90087	10.8122	10.8392	9.85331	10.0728	10.1599	9.81538	10.0701	11.6917	11.3509	10.1762	9.88417	11.5048	9.49586	10.4094	10.1984	9.61655	9.61287	11.9509	10.7432	11.9454	10.8903	10.3061	10.8564	8.72451	9.62022	10.8273	10.268	10.1072	8.17991	10.0954	11.0808
AK4	-1.0839	10.6696	-3.85028	0.000137004	0.000595028	0.280514	DOWN	10.0498	9.01123	7.83289	12.6562	9.76321	10.7228	8.97728	10.0821	10.2348	11.0728	10.3253	11.1254	12.3137	13.1021	13.0863	12.6944	9.35755	11.2883	12.7736	13.5818	11.5788	10.3038	11.6027	11.1737	12.0417	9.41785	11.7151	10.2738	9.12153	11.2521	10.4959	11.5632	10.29	13.6577	12.0042	13.1949	10.7515	10.9469	10.4009	11.0921	9.82177	9.78136
AK5	-1.35631	5.29545	-5.48797	7.16742e-08	7.00003e-07	7.47631	DOWN	4.45943	5.70044	3.80735	6.6865	7.52356	3.58496	8.87036	2	4.85798	2	5.49185	5.90689	6.49185	6.35755	7.33092	4.32193	7.09803	3.16993	6.40939	4.24793	2.58496	7.16993	5.35755	4.24793	4.70044	4.39232	5.90689	3.45943	4.32193	6.04439	5.78136	4.52356	4.70044	5.42626	4.45943	6.10852	4.52356	7.03342	4.58496	5.42626	5.49185	4.08746
AKAP12	-1.17572	11.247	-3.98629	7.956e-05	0.000363441	0.790516	DOWN	8.84235	11.8321	9.84392	12.6795	9.01123	11.7524	12.5486	9.18239	11.2615	7.48382	10.8471	12.5469	10.4083	11.411	14.7444	11.224	11.0688	6.72792	8.37504	7.87652	9.93221	12.9961	10.8642	10.8057	8.49586	9.37504	9.24793	11.3326	9.29462	13.058	12.2279	9.95128	10.6339	12.3482	10.6046	14.5237	9.53333	9.82496	10.6847	11.7524	12.5967	9.69
AKAP4	1.10299	1.46882	3.56086	0.000413382	0.00159595	-0.749735	UP	1	1	1	1.58496	0	5.58496	0	0	3	2	3.45943	2	1.58496	1	1.58496	4.16993	4.9542	3.58496	1.58496	1.58496	0	5.24793	6.30378	6.67243	0	0	3.70044	0	9.31288	0	0	1.58496	1	0	1.58496	2.80735	1	6.22882	0	2.32193	0	2
AKAP6	-1.8245	8.25981	-5.88719	8.23008e-09	9.76847e-08	9.56411	DOWN	6.98868	8.41363	7.26679	8.94544	7.50779	8.42206	9.20701	5.24793	9.41785	4.85798	7.40088	10.3432	7.30378	9.05257	13.1322	9.07948	8.05528	6.2854	6.78136	5.16993	6.70044	9.39874	8.01123	10.7202	8.09276	6.42626	5.9542	7.2384	4.75489	9.81858	8.38802	7.67948	7.91886	9.60548	6.88264	13.5157	5.75489	8.09803	8.77808	11.7056	8.9629	6.79442
AKAP8P1	2.04185	2.61772	5.38139	1.25117e-07	1.15329e-06	6.94023	UP	0	2.32193	3.32193	3.70044	5.64386	6.02237	6.75489	3	5.24793	4.16993	0	4.45943	6.62936	0	3.32193	1.58496	5	4.58496	2.58496	0	4	5.04439	1.58496	4.45943	5.24793	1.58496	4.64386	0	0	1.58496	5.58496	4.16993	0	0	4.9542	2	4.24793	7.59991	2.58496	4.08746	5.61471	1.58496
AKR1B10	-3.00291	10.6445	-4.874	1.57064e-06	1.13097e-05	4.51428	DOWN	13.9539	7.52356	8.65821	6.30378	6.58496	9.70563	12.4546	11.0928	11.1972	14.4527	12.2	7.29462	6.22882	14.037	8.42206	9.17243	12.6924	12.4491	4	14.3983	13.7226	9.01402	13.7986	3.90689	13.3643	6.98868	13.1517	11.6357	5.39232	8.43045	15.3506	12.6083	13.4256	14.7981	16.5971	6.94251	14.028	10.3608	13.5996	3.45943	10.2842	13.0074
AKR1B15	-3.31203	4.2268	-7.1415	4.28783e-12	9.82659e-11	16.9018	DOWN	7.9542	0	0	4	2.58496	2.80735	7.32193	2.58496	4.64386	9.97585	6.67243	0	1.58496	7.14975	1	1.58496	4.64386	6.71425	1.58496	7.87652	7.75489	5.16993	7.43463	1.58496	6.97728	3	6.91886	5.78136	0	1.58496	5.08746	7.03342	2	4.75489	11.3365	0	7.53916	5.75489	7.96578	3.70044	6	3.58496
AKR1C1	-2.88643	9.82226	-8.46156	4.82183e-16	2.50441e-14	25.7817	DOWN	11.4788	9.11634	7.44294	7.88264	8.27146	9.94983	9.30378	8.31741	9.24793	10.3185	11.1972	10.8773	10.6083	12.0634	10.5793	9.24793	8.66534	10.2444	6.72792	13.6094	9.37287	9.69349	9.04166	7.66534	9.29692	7.53916	11.4934	9.37504	3	9.43879	14.6999	12.5563	12.3729	11.7793	11.265	11.8895	10.6457	7.16993	9.77808	7.35755	11.3157	9.71425
AKR1C2	-3.54425	8.53538	-8.81293	3.59008e-17	2.24785e-15	28.3249	DOWN	5.58496	8.50779	3.58496	6.79442	8.94251	9.44915	9.12412	8.37938	6.89482	7.66534	8.56605	6.53916	10.7814	11.2784	9.15987	7.58496	5.24793	9.75489	5.55459	10.4939	8.29921	8.25267	6.83289	8.40514	8.80413	7.55459	9.71425	9.11374	0	8.16993	16.7348	8	15.4668	13.5594	10.6193	8.03342	10.5915	5.78136	6.53916	6.9542	8.74819	6.22882
AKR1C4	1.38296	5.40463	3.2968	0.00106385	0.00368857	-1.62367	UP	3.16993	8.11374	0	3.16993	5.16993	9.21675	5.49185	3.32193	5.32193	5.39232	6.42626	2.58496	0	7.14975	3	7.11894	5.9542	7.63662	5.49185	4.90689	4.08746	7.31288	6.39232	10.0701	6.65821	0	3.45943	4.70044	1	3.90689	7.14975	3.32193	5.58496	8.21917	4.45943	4.52356	4.70044	7.50779	8.13955	6.42626	5.52356	5.52356
AKR1C7P	1.02763	2.54419	4.28227	2.31078e-05	0.000118862	1.95661	UP	2.58496	3.45943	0	3.32193	1.58496	4.16993	3.90689	0	3	0	2.58496	1.58496	2.32193	3.70044	3	1	4.58496	1.58496	3.80735	3.58496	1.58496	4.45943	3.90689	2.32193	3	2.58496	0	1.58496	2	4.32193	4.85798	3.70044	2.80735	5.90689	2	1	1.58496	5.2854	2	1.58496	4.58496	2.80735
ALAS2	-1.43434	2.95767	-4.35668	1.67411e-05	8.87937e-05	2.26178	DOWN	2	8.07682	2.32193	5.67243	3	2	3.32193	0	2	0	0	4.24793	4.39232	3.90689	3	3.90689	3	0	1	4.24793	2	3	0	4.24793	2.58496	2.80735	2	1	2	2.80735	5.39232	2.80735	3.16993	2.32193	4.85798	2.32193	7.25739	3.32193	0	2.80735	3	3.45943
ALDH1A2	-2.001	5.83471	-6.88967	2.13791e-11	4.32962e-10	15.3379	DOWN	4	4.9542	3	7.84549	2.58496	6.20945	8.97154	4.52356	5.04439	1.58496	5.78136	5.16993	4.16993	6.2854	10.4263	5.49185	7.09803	2	5.45943	2.58496	5.70044	7.13955	4.9542	7.53138	2.80735	9.13955	4.58496	4.24793	6.14975	12.0624	7.5157	3.16993	4.45943	8.18982	5.20945	6.80735	4.45943	7.32193	7.47573	5.12928	6.06609	4.75489
ALDH1L1	-1.93829	6.37084	-4.42367	1.24757e-05	6.80933e-05	2.54061	DOWN	2.32193	4.75489	3.80735	7.05528	8.9571	7.49185	6.70044	8.15482	4.24793	4.24793	6.24793	5.55459	5.08746	5.52356	9.26679	4.39232	6.55459	10.5897	7.70044	3.45943	6.64386	6.56986	7.85798	9.59805	2	6.82018	4.08746	7.88874	1	6	9.81218	10.3509	6.12928	10.2574	4	8.26679	3.45943	7.97728	5.88264	5	9.05257	8.34873
ALDH1L1-AS2	-1.72901	1.54382	-6.34315	6.00408e-10	9.0019e-09	12.0984	DOWN	0	0	0	2.80735	2	0	2.32193	2	1	0	2	3.45943	0	0	3.80735	1	4.75489	3.58496	2.58496	1	0	3.45943	1	2.80735	0	2	0	2.32193	0	2	2.80735	1	0	2.32193	0	3.58496	1.58496	5.97728	0	2	0	1.58496
ALDH3A1	-2.50761	10.0827	-5.39607	1.15938e-07	1.07771e-06	7.01351	DOWN	12.3236	7.2854	9.42626	6.44294	10.6751	7.17991	12.4385	12.0553	10.9701	11.2837	10.0168	7.66534	6.90689	12.9817	9.57365	7.26679	10.7039	10.6935	6.53916	12.5814	11.1984	8.05528	9.10066	8.36194	9.23362	8.41363	12.4043	10.8226	2.80735	8.42626	12.9721	7.08746	11.1293	12.4762	12.7347	8.29462	14.157	8.77479	11.5304	7.2384	9.80413	11.0369
ALDH3B2	1.39419	6.82771	2.61215	0.00933087	0.0247652	-3.59006	UP	9.39017	2.80735	9.3015	7.76155	13.1768	10.1911	5.04439	7.58496	4.90689	2.80735	4.08746	6.50779	2.58496	7.49985	6.9542	8.14975	7.74819	10.0901	6.84549	6.40939	6.97728	7.50779	4.08746	9.0634	8.94251	6.79442	8.7879	10.4168	6.75489	3.45943	6.02237	3.58496	5.90689	10.4737	4.24793	5.93074	7.52356	7.41785	9.82655	4.90689	4.52356	5.80735
ALDH6A1	-1.18309	10.9788	-9.55742	1.16906e-19	1.12693e-17	33.9391	DOWN	9.45327	10.9248	9.09803	11.239	12.0434	11.183	10.9773	8.69	11.7164	11.0293	9.77808	10.9694	11.178	12.2143	11.6983	10.3185	10.5708	10.944	11.5845	11.1536	9.95128	10.9622	11.5722	11.9762	11.8711	11.3821	11.4019	9.58308	11.2396	10.3332	11.0175	11.697	9.73471	11.2222	11.1855	11.5929	12.2258	9.76653	10.5304	9.51175	11.1072	10.4686
ALDOB	-2.02051	9.35523	-3.2814	0.00112208	0.00386835	-1.67268	DOWN	9.22641	10.3902	6.72792	7.39232	6.16993	8.73132	10.2784	7.19967	10.0993	8.70044	14.5332	5.12928	6.97728	12.7738	7.33092	12.3907	9.02791	12.4944	7.65105	15.2579	8.56224	8.10329	9.56033	7.57743	14.4194	9.633	9.27845	5.90689	2.58496	6.71425	6.12928	11.6631	10.5479	11.3554	11.9491	7.24793	10.5401	10.6724	11.3134	10.4909	8	10.8265
ALDOC	-1.58608	9.83362	-8.11709	5.73994e-15	2.34294e-13	23.3589	DOWN	8.98299	10.9809	7.84549	11.2228	12.3129	11.5033	10.341	7.25739	10.363	8.633	9.93074	9.97298	8.87652	10.8361	9.64566	10.6375	9.46964	8.58496	11.4691	9.57932	8.26209	9.3966	11.713	9.96723	10.3287	8.07682	10.3072	8.81698	9.46148	9.23601	10.7822	10.6402	10.1674	11.3247	9.12153	8.84235	11.2992	9.4818	10.1059	7.82655	9.26913	8.21917
ALK	-1.41772	3.57324	-4.88796	1.46909e-06	1.06549e-05	4.57816	DOWN	3.80735	3.70044	3.32193	3.58496	4.39232	3.90689	5.85798	0	4.16993	0	4.90689	3.58496	2	4.08746	5.67243	3.16993	6.14975	2	3.90689	1	1	6.18982	3.16993	4.39232	2.80735	1.58496	0	0	2.32193	4.64386	3.70044	3	2.32193	3.58496	3.16993	5.20945	1	7.18982	4	5.49185	2.80735	3.45943
ALKAL1	2.07847	5.64099	6.07184	2.90397e-09	3.74085e-08	10.5715	UP	6.79442	4.90689	5.08746	7.24793	3.32193	8.40514	2	3.90689	8.05528	3.90689	6.04439	5.16993	5.88264	7.22882	9.89936	5.04439	6.93074	6.18982	7.50779	2.58496	4.85798	6.10852	5.83289	5.39232	6.71425	5.49185	7.06609	4	2	9.07414	5.9542	5.75489	7.82655	6.82018	7.5157	5.9542	3.70044	6.47573	6.80735	8.25739	7.25739	5.20945
ALKAL2	-1.89805	4.43202	-7.82272	4.50302e-14	1.52441e-12	21.3461	DOWN	3.58496	3.32193	3.16993	3.90689	3.70044	6.30378	4.64386	4.24793	3.45943	5.67243	6.02237	3.80735	4.64386	5.70044	4.32193	5.04439	5.67243	2.80735	1	4.75489	4.90689	5.35755	2	3.58496	4.75489	3.70044	2.32193	3	5.08746	3.58496	4.39232	4	4.75489	6.44294	5.72792	4.24793	4.45943	5.93074	2.32193	3.58496	5.80735	4.75489
ALPG	3.82639	5.88774	6.18707	1.49666e-09	2.04533e-08	11.2133	UP	9.52943	2.58496	3	5.45943	7	12.5563	5.08746	7.59991	4.16993	0	4.16993	1	1.58496	13.3464	2	3	7.04439	6.53916	7.55459	8.9542	11.9307	3.58496	5.85798	6.12928	7.76818	6.35755	7.09803	5	17.0451	3.32193	4	5.24793	9.57743	9.49386	9.633	1	5.9542	7.83289	5.52356	4.08746	3.32193	8.61471
ALPP	3.77587	4.86356	6.93576	1.59843e-11	3.29774e-10	15.6208	UP	7.18982	1.58496	3	3.16993	6.93074	10.2033	4.08746	6.16993	8.83289	1.58496	0	0	2.32193	9.16491	2.32193	2.80735	5.20945	4.24793	5.61471	6.12928	9.92926	3.16993	4.39232	4.64386	5.42626	3.90689	5.2854	7.32193	15.3877	1.58496	7.97728	2.58496	7.62936	5.97728	6.90689	2	5.16993	5.32193	3.58496	2.58496	3	6.74147
AMELX	1.10293	1.98028	3.70673	0.000239045	0.000978548	-0.239869	UP	3.58496	1.58496	0	2.32193	1.58496	2.32193	1.58496	0	4.58496	2.58496	1	1	4.16993	0	5.16993	4.39232	3.32193	1	5	1	1	5.67243	2	4.32193	3	0	3	0	0	1	1	1	0	1	3	2.58496	1.58496	2.32193	1.58496	4.24793	2.58496	1.58496
AMER3	-1.56095	3.12469	-3.78262	0.000178492	0.00075466	0.032952	DOWN	0	11.2258	2.58496	6.56986	6.37504	2.58496	3.45943	1	2.32193	0	2.32193	3.45943	5.97728	4.75489	4.32193	3.45943	5.2854	3.45943	2.32193	0	1	5.70044	2.58496	12.5389	0	2.32193	3.16993	4.52356	0	10.7515	2	1	0	2.32193	2.32193	3.80735	3.16993	5.88264	1.58496	3.80735	1	2.32193
AMH	2.10788	6.62432	5.20286	3.11898e-07	2.63903e-06	6.06264	UP	8.6865	6.85798	8.03342	8.41785	6.18982	7.10852	6.39232	5.45943	5.90689	5.9542	6.40939	8.97441	9.24079	5.78136	7.80735	8.85175	6.06609	8.37069	11.1984	9.92778	3.32193	7.62936	10.9794	10.5372	8.29921	3.45943	9.7879	3.90689	8.68299	6.90689	6.89482	9.83605	5.42626	4.24793	7.5157	4.64386	9.79766	6.84549	6.32193	7.74819	5.45943	5.78136
AMPD1	-2.30237	4.52419	-5.91801	6.92879e-09	8.33115e-08	9.73045	DOWN	3.90689	4.9542	4.45943	6.16993	0	4.16993	6.91886	3.16993	4.08746	2.80735	5.80735	2	3.45943	8.46352	4.45943	3.90689	6.53916	5.85798	3.32193	3.58496	3.90689	4.90689	2.58496	5.20945	5.04439	3.90689	3.45943	5.08746	3.70044	3.58496	5.24793	4.75489	3.32193	2.58496	4.58496	5.80735	7.47573	4.58496	3.32193	4.75489	3.45943	7.96578
AMT	-1.17142	8.64254	-6.2544	1.01148e-09	1.44357e-08	11.5929	DOWN	5.75489	7.20945	6.20945	10.5372	11.0593	10.403	9.77149	7.14975	9.71939	8.92184	7.12928	8.40088	8.42626	9.63118	9.79116	8.89178	9.41363	5.42626	8.21917	7	8.69697	9.07414	10.7624	10.2656	8.85487	9.57743	8.30834	7.19967	9.70044	7.22882	8.29921	8.20457	6.58496	8.07146	7.53138	9.37287	9.41151	9.75989	7.04439	8.13955	8.25267	9.78136
AMTN	-2.71955	1.81615	-6.93685	1.58739e-11	3.27696e-10	15.6276	DOWN	0	2	0	3	0	1	2	5.55459	1	2.32193	0	2	1	1	1	2.32193	4.64386	1.58496	0	1	5.85798	3.16993	0	2	0	0	1	5.20945	0	1.58496	4.16993	0	2.32193	2	1.58496	1.58496	0	5.04439	3.70044	1	0	1.58496
ANAPC1P4	1.73606	5.42138	9.11553	3.62751e-18	2.76306e-16	30.5709	UP	6.32193	6.10852	5.61471	6.42626	5.9542	6.30378	6.08746	3.80735	6.56986	4.90689	3.70044	5.75489	5.93074	6.24793	5.90689	5.45943	6.22882	2.80735	5.16993	3.90689	3.80735	6.70044	5.93074	5.75489	4.80735	5	4.24793	4	8.79116	6.6865	7.2854	5.70044	5.85798	6.62936	5.80735	5.97728	6.20945	6.58496	4.90689	3.32193	7.36632	5.83289
ANGPT1	-1.1075	8.07571	-5.51954	6.06664e-08	6.02321e-07	7.63688	DOWN	6.39232	7.39232	7.13955	9.45738	5.97728	11.1415	9.56986	6.90689	8.3966	5.80735	7.10852	9.37287	7.77479	8.47573	9.99859	6.52356	7.54689	7.49985	6.22882	6.30378	8.43879	7.07682	7.05528	7.59246	5.52356	8.77808	6.56986	6.08746	6.49185	8.47573	9.2738	7.82655	6.93074	8.73132	8.12412	10.813	7.08746	8.37938	7.31288	7.98868	9.0954	7.45943
ANGPT2	1.6641	9.55953	9.05626	5.70578e-18	4.21437e-16	30.127	UP	8.87344	10.3805	8.68299	10.8218	9.00282	10.2831	10.9462	8.33985	10.2095	7.31288	8.75822	8.57365	9.13186	8.58871	10.3343	10.2324	9.93074	8.30378	9.04985	9.22882	8.79766	9.32193	10.9679	8.7879	9.16993	9.21432	9.25503	7.98299	10.6211	10.599	11.2082	9.48985	10.0168	11.8653	9.57554	9.39446	9.76818	8.98584	10.0098	5.93074	11.9542	8.93074
ANGPTL1	-3.29253	7.422	-8.07993	7.46635e-15	2.9799e-13	23.1019	DOWN	5.04439	7.52356	6.12928	8.2384	3.16993	7.36632	9.01959	4.64386	9.71596	3.80735	8.2854	10.2033	5.88264	8.03892	12.6823	4.32193	7.27612	3.58496	4.58496	3.32193	6.94251	7.31288	5.61471	6.32193	3.90689	3.45943	4.39232	6.44294	4.24793	9.71939	9.74987	5.39232	8.39232	8.90989	6.55459	13.1416	5.55459	6.61471	8.77149	10.8178	7.29462	5.39232
ANGPTL4	-1.23921	8.84827	-4.73803	2.98787e-06	2.0266e-05	3.90031	DOWN	7.35755	12.3677	6.26679	8.56605	6.45943	8.17991	8.15987	8.54303	7.90689	8.94544	9.03617	8.69697	8.36632	8.50779	11.5546	9.25267	8.47168	5.42626	9.03342	8.06609	8.90989	8.11374	11.1459	8.01123	8.07146	8.91886	10.3794	8.14466	11.1586	9.29462	8.98868	8.02791	8.58871	10.6528	8.44708	8.68299	11.4553	8.27146	8.8857	6.85798	13.4151	8.24317
ANGPTL5	-1.7751	2.07171	-6.60489	1.24788e-10	2.14199e-09	13.623	DOWN	0	2.58496	1	3.16993	1.58496	3.70044	5.16993	0	3.80735	2	1.58496	1	1.58496	1.58496	4.24793	3.16993	4.80735	1.58496	3.58496	0	1	3	1.58496	4.32193	0	0	2	0	0	2.58496	3.90689	0	0	3.32193	2.58496	5.12928	2	5.75489	1	4	2.32193	2.58496
ANGPTL7	-2.53826	4.50581	-7.5311	3.28496e-13	9.45958e-12	19.4062	DOWN	2	4.52356	3.90689	5.2854	2.58496	5.61471	6.12928	3.16993	6.10852	2.58496	5.64386	6.37504	3.58496	4.75489	8.31741	3.58496	5.49185	0	3.70044	2.58496	3.32193	6.50779	2.32193	5.39232	1.58496	3.16993	3.58496	2.58496	2.58496	6.67243	8.35315	2.80735	5.85798	6.70044	3.58496	9.36851	3	6.59991	5.58496	7.16993	5.70044	0
ANK2	-1.87534	9.21599	-6.055	3.19678e-09	4.0704e-08	10.4786	DOWN	7.04439	9.56415	8.69349	10.3242	7.40088	10.7305	11.5684	6.47573	10.1421	7.15987	9.9901	10.4898	9.72792	10.7797	13.5148	7.26679	9.97585	8.66178	6.50779	5.45943	8.03342	9.07146	7.16993	10.8819	6.44294	7.3837	6.6865	7.59246	6.6865	10.4533	9.43463	8.23362	8.42206	9.6865	8.3966	12.9715	7.98868	8.16993	9.28309	11.5245	9.30378	8.93958
ANKRD1	1.74359	3.51376	4.65301	4.43291e-06	2.65756e-05	3.5243	UP	6.08746	1	1	8.11894	4.32193	7.33985	2.32193	4.39232	3.70044	1	2.32193	2	1	3.32193	4.39232	3.80735	4.75489	1	4.32193	0	5.12928	4.24793	5.45943	4.16993	2	6.39232	2.32193	2	4.32193	2.58496	6.84549	2.58496	5	2.32193	4	2	3	3.70044	5.39232	1.58496	4.70044	3.90689
ANKRD13B	1.22764	9.47729	6.68256	7.75619e-11	1.40484e-09	14.085	UP	9.17991	9.79604	7.84549	10.5507	11.7125	11.8564	9.29921	7.74147	10.4898	10.2644	8.77149	10.3106	10.4939	10.5774	10.2912	8.26679	10.0485	8.55842	10.9715	10.4346	8.3837	8.76487	9.27146	11.2384	10.7499	9.17742	9.11894	7.49985	11.9252	11.1668	9.24079	11.0788	9.05799	8.98868	9.10329	9.5411	11.5689	10.3729	8.65105	7.9542	9.19229	8.27612
ANKRD20A11P	-1.85326	3.84475	-5.38959	1.19909e-07	1.11044e-06	6.98112	DOWN	1	2.32193	3.16993	5.35755	1.58496	8.01681	6.89482	3.70044	2.58496	3.32193	5.20945	2	2.32193	3.32193	6.42626	2.80735	6.56986	3	3.90689	1	1.58496	4.52356	5.04439	2.58496	3.16993	2	2	8.01681	2.58496	2.58496	5.80735	3	1.58496	5.35755	4.70044	4.90689	7.24793	6.90689	1.58496	4.90689	3.32193	4.80735
ANKRD29	-1.26617	8.41519	-4.60208	5.59881e-06	3.27539e-05	3.30198	DOWN	9.49785	5.80735	7.62205	8.44708	6.72792	6.53916	12.1608	8.40088	8.07146	4.64386	8.59619	8.98014	5.97728	9.13699	10.2143	9.50383	10.0954	8.0607	7.78136	3.32193	7.86419	7.13955	11.7863	5.64386	7.77479	7.32193	10.0403	8.00562	6.44294	9.0954	9.82972	7	8.05528	7.26679	9.43463	10.7134	9.05257	10.1774	7	8.60733	7.62936	8.69
ANKRD31	-1.36133	4.34316	-5.69228	2.40387e-08	2.58687e-07	8.52919	DOWN	6	1.58496	3.70044	5.9542	4.64386	7.15987	7.08746	3.16993	4.16993	1.58496	3.16993	1.58496	5.93074	5.16993	5	5.42626	6.26679	4.16993	3.45943	1	3.90689	5.64386	5.58496	4.75489	3.16993	5.49185	1.58496	4.70044	5	3.32193	5.04439	3	2	4	4.45943	3.58496	5.42626	6.39232	3.32193	5.20945	3.70044	5.45943
ANKRD33	1.31351	2.14945	3.66229	0.000283001	0.00113888	-0.397243	UP	0	6.24793	0	3.90689	3	5.42626	2.80735	0	1	0	0	0	1	0	1	3	5.55459	3.45943	3.16993	0	1	4.32193	0	5.49185	3.90689	4.45943	2	1	1.58496	5.20945	3.16993	1	1	1	2.58496	1.58496	2	6.70044	1.58496	3	2.80735	1
ANKRD33B	-1.23146	7.87746	-5.20324	3.11294e-07	2.63523e-06	6.0645	DOWN	6.52356	7.53916	7.34873	8.84862	5.45943	8.41785	11.1039	6.2854	7.15987	5.32193	9.38154	6.14975	8.76487	9.51175	8.68299	6.10852	8.92481	5.04439	5.61471	4.08746	6.42626	6.20945	6.74147	6.93074	5.72792	10.137	7.45121	6.79442	8.03342	7.96578	7.52356	8.64746	6.45943	7.56986	7.40939	9.48784	7.44294	6.96578	6.93074	8.12928	9.35975	8.59619
ANKRD35	-2.18509	6.95932	-9.3269	7.10491e-19	6.06135e-17	32.1692	DOWN	7.20945	6.93074	5.67243	7.21917	6.2854	7.2384	7.70044	5.97728	7.16993	4.90689	7.06609	7.81378	5.80735	7.06609	9.29232	5.55459	7.55459	5.52356	5.9542	4.80735	6.62936	7.67243	5.16993	6.53916	5.49185	5	5.75489	7.70044	4.52356	7.87036	7.76818	5.88264	7.32193	7.49985	6.35755	9.43463	5.55459	8.45533	8.43879	7.46761	8.43463	6.14975
ANKRD37	-1.12707	7.4702	-5.65783	2.89655e-08	3.06962e-07	8.34936	DOWN	6.74147	6.74147	7.04439	7.76818	9.31741	7.54689	7.69349	7.59246	7.11894	7	7.30378	7.77479	7.90087	7.49185	8.33539	7.8009	7.59991	7.53138	8.79766	6.96578	6.53916	7.20945	10.0728	6.62936	7.56986	7.09803	8.15482	7.34873	9.28077	7.01123	7.32193	8.82655	6.06609	7.94837	7.21917	7.76155	9.52356	6.22882	6.89482	5.90689	8.57365	6.47573
ANKRD45	1.06577	4.37134	3.40028	0.000739776	0.00266964	-1.28878	UP	2.58496	5.75489	3	4.75489	2.58496	4.08746	5.61471	8.89178	3.70044	3.16993	1.58496	2.80735	4.08746	10.7756	5	4.39232	6.04439	7.8392	6.39232	5.08746	6.04439	5.42626	3	4.45943	7.69349	5.88264	1.58496	3.70044	4.39232	4.52356	4.90689	5.55459	2.80735	4.75489	5.16993	4.39232	2.32193	7.20945	4	2.32193	6.67243	3.45943
ANKRD53	-1.64136	5.52163	-8.9783	1.03217e-17	7.27725e-16	29.5461	DOWN	4.75489	6.37504	4.39232	6.20945	4.80735	6.45943	6.42626	3.32193	5.45943	4.64386	5.67243	6.10852	4.80735	6.10852	7.76818	3.32193	5.78136	3.58496	4.16993	4.80735	4.90689	5.80735	5	7.72792	3.90689	6.06609	3.45943	4.32193	4.16993	6.35755	6.18982	4.16993	5.20945	5.45943	5.16993	7.69349	5.04439	5.70044	5.70044	5.78136	6.44294	4.39232
ANKRD61	1.4493	5.14431	8.61337	1.5833e-16	8.91562e-15	26.8718	UP	3.90689	4.08746	3.45943	5	4.32193	7.11894	6.87036	3.45943	6.62936	3.90689	3	5.2854	5.16993	4.9542	5.88264	5.45943	5.88264	5.20945	5.78136	4.58496	4.58496	6.18982	6.76818	7.09803	3.70044	5.39232	4.45943	3.80735	5.45943	4.75489	6.53916	4.80735	4.08746	6.20945	5.04439	5.35755	6.76818	6.61471	4.16993	4.64386	7.18982	4.75489
ANKRD63	-1.84003	1.48515	-6.43001	3.58416e-10	5.62585e-09	12.5988	DOWN	1	1.58496	0	2.80735	0	1.58496	2	0	1	0	1	3.16993	1.58496	1.58496	3.16993	1.58496	1.58496	1	2.32193	2.80735	1.58496	1	0	1.58496	3.45943	3.80735	1	2	2.32193	3.80735	1.58496	3	1.58496	2	1	5.52356	1	4	1	1.58496	0	1
ANKRD65	-1.93988	7.66443	-7.54109	3.07169e-13	8.91311e-12	19.4717	DOWN	6.52356	9.06609	6.40939	7.64386	8.633	6.10852	9.07146	8.34873	7.07682	5.39232	8.75822	7.17991	5.88264	5.80735	10.2288	5.20945	8.00562	4.75489	5.42626	5.2854	6.18982	7.49185	5.24793	12.6101	5.83289	5.9542	5.52356	7.43463	5.55459	8.55075	8.33539	6.24793	8.16993	7.8009	6.6865	10.0224	7.72792	5.39232	7.89482	7.76155	7.90689	7.31288
ANKRD7	-1.28102	1.84941	-5.03611	7.15608e-07	5.57903e-06	5.2664	DOWN	0	2.80735	1	4.08746	0	4.75489	3	0	2.32193	0	2.32193	2.58496	2.58496	1.58496	4.16993	2.80735	4.70044	2.80735	3.70044	2	0	4.90689	0	2.58496	1	5.67243	0	1	0	1.58496	0	1	2.32193	3.32193	2.80735	3.70044	0	6.39232	2	3.58496	3	1
ANKS1B	-1.93141	5.52057	-6.59658	1.31267e-10	2.24519e-09	13.5739	DOWN	2.58496	7.30378	4.39232	6.78136	3.80735	5.32193	6.84549	4	5.97728	3.16993	4.90689	6.39232	6.9542	5.88264	9.633	5.04439	7.90689	2.32193	5.75489	2.80735	4.58496	7.57743	4.08746	7.03342	3	6.40939	2	5.35755	2.58496	7.2854	5.55459	4.45943	3.90689	4.80735	5.39232	9.66711	4.64386	8.06609	5.64386	8.24317	5.75489	4.75489
ANKS4B	1.92851	9.57298	5.07674	5.85691e-07	4.6566e-06	5.45833	UP	9.77972	11.4409	9.71081	11.5236	5.20945	11.8514	11.357	7.31288	11.1599	10.4336	10.3869	10.3977	4.52356	11.1427	8.55459	11.1805	10.0168	10.4686	11.1536	10.0607	8.72451	10.599	11.3365	11.7237	11.5812	8.40939	10.7254	8.64746	3.32193	11.286	5	10.9381	8.89482	11.1273	11.6142	10.3565	11.4823	9.99152	10.207	8.60363	9.74315	10.2479
ANLN	2.26124	11.6404	12.6857	2.67322e-31	3.37856e-28	60.2826	UP	11.5275	11.6662	11.8186	12.0502	12.859	13.2789	11.0654	9.34207	12.7647	12.5777	9.35315	12.5594	12.4961	11.9535	11.3231	12.5275	11.6239	11.6689	12.1085	12.8043	10.8734	11.1762	12.5675	13.0622	12.0224	12.3614	12.4307	10.2491	13.5958	13.2254	11.9654	12.2738	11.7727	12.9031	12.474	10.7863	13.0865	11.4605	10.8549	10.032	12.2624	11.527
ANO5	-1.95995	7.84341	-5.3375	1.56979e-07	1.41638e-06	6.7221	DOWN	3.90689	7.24793	5.83289	8.89178	5.04439	10.6284	9.30606	5.83289	10.1408	3.90689	4.16993	10.1344	10.5285	9.43463	11.1929	4.90689	8.3966	8.8009	5.45943	2	8.53916	9.43879	3.45943	5.32193	4.16993	8.78136	4.24793	7.09803	3.58496	8.70044	7.70044	5.08746	7.35755	10.2204	9.03617	11.204	10.5108	8.93369	7.74819	9.36413	8.49185	7.92481
ANO9	1.41514	10.9989	6.38716	4.62615e-10	7.11414e-09	12.3513	UP	10.2155	11.0098	9.22159	12.0046	11.4898	13.179	12.912	8.94251	11.7402	11.1855	11.5579	10.7912	11.5221	12.1267	9.16742	12.6243	10.8986	10.8681	12.6702	11.9996	9.81858	10.4073	12.4427	12.8889	12.3432	10.8321	10.9527	8.56605	10.9766	11.4231	11.2264	13.1704	9.62205	10.0168	11.0403	9.61839	12.1864	12.8108	10.3859	11.0133	10.6457	10.7649
ANOS1	1.57787	8.89828	5.95123	5.75103e-09	7.0214e-08	9.91055	UP	9.48985	9.53333	9.17493	10.9432	8.30378	9.49386	10.933	5	11.2825	3.80735	8.57743	10.2288	10.6339	10.4686	10.1972	7.29462	9.29462	5.20945	9.30834	6.20945	7.37504	8.40088	9.84549	8.86728	9.05799	7.85175	6.40939	6.72792	9.83763	12.5008	9.93074	10.1046	8.73809	10.5038	7.67243	9.54689	7.71425	6.76818	8.66888	8.19967	9.80413	7.27612
ANXA13	1.77326	8.78307	3.52905	0.000464714	0.00177065	-0.858387	UP	6.6865	12.9432	8.9542	10.7879	5.80735	13.3544	9.89178	5.45943	10.0928	10.1836	12.5423	10.668	5.16993	9.19476	8.26209	11.7061	7.53916	11.6142	6.82018	8.07682	7.60733	7.59246	13.6672	12.8973	12.4207	6.84549	10.4605	8.04985	0	6	7.42626	8.19967	10.6448	9.4818	8.03342	10.6484	6.40939	8.96867	7.88264	8.20457	9.98726	7.45121
ANXA4	1.04447	13.9536	6.18828	1.48613e-09	2.03176e-08	11.2201	UP	14.5897	12.9467	13.3375	14.2995	13.1317	15.4355	14.7452	12.4861	14.6897	13.0264	12.475	12.6262	12.1418	14.67	12.5997	14.2426	13.9268	14.893	13.7678	13.5695	13.2377	14.1018	15.9171	12.9067	14.7683	12.9285	14.9501	12.2955	14.1489	14.9238	14.4278	14.0194	14.4837	15.3	14.6118	12.4455	14.3757	13.6895	14.6294	12.3942	13.8903	14.3453
ANXA8L1	-1.16399	5.12977	-2.89864	0.00395087	0.0117449	-2.82037	DOWN	8.85487	4.75489	3.45943	5.12928	6.72792	6.12928	6.47573	7.65821	4.80735	1.58496	3	4.39232	6.44294	4.08746	7.31288	3.80735	5.2854	3.70044	1.58496	4.52356	5.88264	4	8.17493	5.75489	3.16993	4.58496	6.67243	8.89178	2.80735	2.58496	10.5118	3.80735	6.47573	2	3.80735	3.70044	4.16993	5.93074	5.08746	4.64386	4.80735	5.42626
AOC1	1.47571	12.3427	3.86788	0.000127808	0.000558715	0.345613	UP	13.1407	13.9331	9.84862	12.8648	15.1025	14.5234	13.0452	10.3049	14.3233	12.1706	13.2333	10.0755	8.19476	15.1712	11.605	14.2805	12.9246	14.4322	10.7108	12.9915	9.57365	11.5338	13.9555	15.8806	13.7617	9.93074	14.4691	10.1599	13.9162	13.1992	11.6591	13.1839	12.5608	7.65105	15.077	12.2255	12.2414	13.2439	14.1052	12.3035	13.0011	12.98
AOC3	-1.84547	10.9866	-6.25558	1.00448e-09	1.43478e-08	11.5996	DOWN	9.76653	12.1299	10.3117	11.2515	8.61839	10.5831	11.5689	7.7879	11.9495	8.27612	11.9887	12.2544	10.0098	11.7867	14.5327	7.53916	10.9403	7.11894	9.09276	8.94837	9.13186	11.2697	10.0808	10.2784	8.79442	8.01681	8.31288	9.17243	10.4919	13.1236	12.7777	9.60548	11.796	11.9414	10.4998	15.3884	9.26444	8.64386	12.1108	13.1077	12.372	9.65464
AOC4P	-1.20542	3.99255	-4.37258	1.56178e-05	8.34546e-05	2.3276	DOWN	2	3.58496	2.58496	5.20945	4.24793	4	5.20945	1	4.52356	0	3.45943	4.70044	3.90689	4.64386	7.53138	1.58496	6.20945	0	4.16993	2.58496	3.16993	5.85798	3.16993	4.16993	1	3.58496	1.58496	2.32193	3.32193	3.90689	5.61471	4	4	5.20945	3.32193	8.33539	3.16993	7.24793	3.90689	6.32193	6.58496	2.32193
AOX1	-1.74608	7.59245	-5.08528	5.61465e-07	4.48383e-06	5.49881	DOWN	2.80735	9.61471	6.35755	8.2854	9.6865	10.0607	10.1874	5.20945	8.30834	4.9542	8.90087	8.10329	7.49185	8.00562	11.6262	5.08746	7.58496	5.49185	5.42626	4.85798	7.5157	8.11894	5.24793	11.4993	5.35755	6.67243	5.80735	6.44294	6.10852	9.11894	7.39232	6.04439	6.88264	9.78627	4.85798	9.49785	5.08746	7.01123	7.07682	7.45943	11.5831	7.2384
AP1S3	1.24171	9.80218	6.49466	2.43276e-10	3.95689e-09	12.9749	UP	8.71081	8.2384	9.47573	9.57175	9.21917	10.5793	10.5294	9.16993	11.5967	9.77808	7.78136	10.3912	11.117	10.3815	9.04439	9.79279	11.3021	9.81378	9.64205	10.4294	9.64205	10.1072	11.2288	9.88722	10.2216	9.6865	10.585	8.86109	12.0492	9.09803	11.1978	9.85175	9.49185	10.1611	10.6689	8.38802	11.245	8.72451	9.21189	6.40939	8.82018	9.86728
AP3B2	-1.36713	5.42899	-3.74788	0.00020415	0.00085029	-0.0925656	DOWN	1.58496	10.9965	4.39232	8.6865	11.5579	5.67243	7.50779	3.32193	5.16993	2	5.58496	5.35755	3.45943	7.45121	7.86419	3.45943	7.12928	2	4.70044	1.58496	3.16993	6.83289	5.61471	12.2811	2.58496	6.32193	5.12928	4.75489	3	11.6211	3.90689	3	3.45943	6.97728	4.64386	6.80735	5.04439	9.08215	4.32193	6.22882	6.22882	5.08746
APBB1	-1.33375	9.50799	-6.38107	4.79654e-10	7.33979e-09	12.3162	DOWN	7.98868	12.1033	8.35315	10.7245	9.57554	11.2906	11.7507	6.82018	9.05528	6.89482	9.86109	9.21917	9.1472	9.98442	12.5684	7.08746	9.30378	8.21432	7.35755	6.24793	8.51175	9.3837	8.45943	11.0775	7.04439	10.3061	6.78136	8.66888	8.2384	12.3129	10.1085	8.54303	9.15735	9.87498	8.65821	12.062	8.41363	7.93074	10.0293	10.6804	10.5038	8.97154
APCDD1	-1.27918	10.3757	-4.37332	1.55672e-05	8.32235e-05	2.33068	DOWN	9.59432	10.9425	8.41363	11.526	7.96578	11.0147	9.01402	8.56605	10.341	8.47978	10.3531	9.99435	9.77314	10.4378	11.0098	9.11894	9.21432	7.67948	13.92	9.84706	8.5157	9.41363	9.98442	11.06	8.72451	9.11374	7.73471	9.76818	9.44087	10.8978	9.62388	9.95565	9.67419	11.656	9.80574	11.5957	8.74483	9.50184	10.1085	9.72622	11.9723	9.22882
APELA	2.0597	3.4936	6.20525	1.34684e-09	1.86524e-08	11.3154	UP	0	5.49185	1	6.84549	1.58496	5.85798	4.52356	1.58496	6.22882	3.16993	1.58496	5	3.16993	5.88264	7.22882	5.45943	5.52356	2.32193	4.08746	4.24793	1	5.45943	3.45943	3.70044	4.52356	2.32193	2.80735	0	0	2.32193	4.16993	3.90689	0	8.07682	4.32193	2.58496	3	6.90689	4.58496	3.45943	7.08746	1
APLN	2.38656	8.26068	7.74062	7.92219e-14	2.53362e-12	20.7944	UP	8.18982	9.36632	6.59991	9.66534	8.73809	9.82018	6.14975	5.67243	8.55459	6.67243	6.18982	6.53916	8.04985	8.65464	10.8234	9.43045	7.08746	7.62205	7.43463	9.47573	7.09803	7.01123	9.0634	11.4788	10.2866	8.37938	7.87036	5	11.1972	8.56986	5.24793	9.37721	10.224	10.3476	9.42836	6.88264	9.11894	8.75822	8.26679	4.90689	11.4357	6.44294
APLP1	-1.4711	8.25519	-4.55274	7.00606e-06	4.0093e-05	3.08868	DOWN	4.85798	13.5823	5.52356	7.76155	8.42206	6.79442	8.2854	12.4821	6.47573	6.6865	7.66534	6.76818	9.15987	9.74147	9.81378	5.16993	9.20212	6.98868	6.24793	9.80896	10.1176	7.29462	6.52356	11.0196	6.53916	12.0868	5.20945	7.07682	6.58496	9.48784	7.67243	6.44294	6.96578	7.04439	6.84549	8.93958	10.5527	7.83289	8.40939	6.64386	9.93958	6.65821
APOA1	-2.6328	6.79797	-4.00391	7.40661e-05	0.000340166	0.857788	DOWN	7.7211	10.7474	1.58496	10.0768	4.16993	10.6935	4.32193	7.53916	8.12412	4.80735	9.10591	3.45943	3.16993	6.16993	6.22882	3.45943	5.2854	11.6808	4.24793	5.24793	12.1558	10.3805	5.20945	9.04985	7.26679	12.8613	5.64386	8.82655	2	4.24793	8.9571	2.58496	6.44294	9.54303	9.50184	2	4.80735	9.77479	13.0358	4.75489	3.45943	6.18982
APOA2	1.57735	3.35989	2.93736	0.00349855	0.0105585	-2.71045	UP	2.58496	6.06609	1.58496	6.67243	0	6.47573	3.16993	0	4.32193	2.58496	5.78136	1	2.80735	1	1	1.58496	4.75489	5.04439	1.58496	5.39232	1	3.45943	1	8.03892	4.90689	5.83289	2.32193	2.32193	2.80735	0	5.64386	3.32193	5.83289	1	1.58496	2	4.85798	10.5727	5.24793	2.32193	5.42626	2.58496
APOA4	-3.90186	4.35256	-5.06583	6.18141e-07	4.8918e-06	5.40666	DOWN	0	3.45943	0	9.84392	0	8.07682	2.58496	5.93074	3.58496	0	8.13955	0	0	2.32193	2	2	4.52356	4.39232	0	2.32193	7.69349	2.80735	6.12928	8	7.87652	11.6316	0	2	0	0	5.24793	0	6.37504	9.79279	12.4956	0	7.09803	5.83289	7.91289	3.45943	0	1
APOB	-3.35065	7.03193	-4.91114	1.31425e-06	9.63009e-06	4.68465	DOWN	2.32193	9.81858	2.58496	13.6995	8.84235	9.85798	10.8541	1.58496	8.24793	1.58496	7.56986	6.75489	5.35755	4.08746	8.42206	4	5.2854	5.67243	3.70044	7.36632	5.20945	5.64386	12.7934	12.8653	8.2854	11.7228	1	3.45943	1	4.52356	8.633	0	5.24793	11.431	3.45943	8.94837	5.04439	8.73809	6.35755	8.43463	7	9.11374
APOBEC1	-1.22337	5.94148	-2.33711	0.0199182	0.047584	-4.25606	DOWN	5.2854	1	1	6.80735	5.55459	9.97871	7.44294	2	8.25267	3.16993	7.27612	6.40939	1	7.67948	4.80735	8.62205	4.90689	6.42626	7.78136	6.85798	4.32193	6.70044	6.24793	6.90689	10.0265	3.80735	11.2952	6.42626	0	8.59619	0	7.7879	4.64386	5.24793	9.11374	5.42626	7.64386	7.78136	8.78463	6.18982	6.37504	7.02237
APOBEC2	-2.46129	5.42234	-8.23039	2.56152e-15	1.13371e-13	24.1479	DOWN	2.80735	3.90689	3.45943	4.08746	3.45943	4.39232	6.53916	7.42626	5	2.80735	4.64386	5.90689	3.70044	4.70044	7.10852	4.32193	6.84549	7.82018	4.24793	3.80735	4.70044	5.93074	5.90689	7.30378	3	10.3465	5.12928	5.35755	3.32193	3.32193	6.42626	4.24793	4.52356	3.90689	5.24793	7.17991	5.24793	6.39232	6.35755	5.45943	5.2854	6.70044
APOBEC3B	1.67172	8.45183	5.54854	5.20168e-08	5.23451e-07	7.78504	UP	9.62388	10.1163	8.8009	9.52552	9.90238	11.1793	7.67948	6.14975	9.46148	10.0112	6.18982	9.02791	8.63662	9.60733	6.80735	9.14211	9.224	5.20945	5.42626	8.97154	8.16993	9.67419	8.36632	9.19229	7.88264	5.35755	9.27146	8.2384	10.3298	9.77808	9.11634	8.28077	8.21917	9.92184	7.59246	6.26679	8.70736	8.58871	9.9901	6.39232	8.24317	8.53528
APOBEC4	1.09215	2.8052	3.59379	0.000365878	0.00143212	-0.636301	UP	2.58496	5.55459	1	1.58496	3	1.58496	3.58496	2.58496	4.58496	1.58496	3.45943	2	1.58496	3	4.16993	4.32193	5.24793	3.45943	3.16993	0	2	3.80735	5.45943	3.90689	4.64386	0	4.32193	2	1.58496	1	1.58496	3.90689	3	0	5.67243	4.75489	4.08746	4.80735	3.32193	4.52356	3.45943	2.58496
APOC1	3.04288	10.3986	10.2635	3.94572e-22	6.20478e-20	39.5253	UP	13.4428	10.8788	11.9665	10.8502	7.76818	11.4594	10.2946	6.61471	11.2715	7.86419	12.2949	11.0941	10.6393	11.7254	9.32643	8.79766	10.6653	11.144	9.91139	8.18982	9.3443	13.5148	11.0279	8.94544	10.6917	12.0957	9.85798	8.77479	11.1618	12.5184	12.1596	11.9862	11.5656	8.70736	8.55842	9.6987	9.75489	9.04439	12.0386	8.81378	7.97728	12.6034
APOC1P1	1.36443	3.14678	5.44499	8.98261e-08	8.57886e-07	7.25902	UP	5.61471	3.32193	4	3.80735	2	2	3.16993	1.58496	3.58496	2	4.39232	2.32193	2.58496	4.75489	4.08746	2.32193	5.08746	3.70044	3.70044	1	3	5.90689	3.32193	2	4	6.49185	2.58496	1	2.58496	3.58496	4.32193	3.80735	3.90689	2	1.58496	2	2.80735	5.9542	4.32193	4.08746	1	5.20945
APOC2	1.09542	3.97182	3.80168	0.000165738	0.000705719	0.102287	UP	5.85798	5.42626	6	6.12928	2.58496	2.80735	3	1	4	2.32193	5.32193	2.80735	2.58496	4.52356	1	5.35755	4.75489	5.20945	3	2.80735	3.70044	5.61471	3.70044	3.80735	4.45943	6.50779	1.58496	2.58496	4.90689	5.80735	5.12928	4.24793	3	4.64386	3.16993	2.32193	3.70044	6.2854	5.90689	2.80735	3.45943	4.64386
APOC3	-3.2923	3.51362	-5.18646	3.38776e-07	2.83482e-06	5.98331	DOWN	0	10.2889	0	5.90689	2.58496	8.32193	2.80735	3.32193	4.85798	0	4.39232	0	0	3.16993	2.32193	1.58496	4.39232	6.12928	0	3.58496	5.67243	5.88264	0	5.75489	5.70044	8.82972	0	1	0	1	2.80735	0	3.16993	6.9542	4.90689	3.45943	3.16993	6.14975	9	3.16993	0	2
APOD	-1.54378	11.1433	-3.53159	0.000460406	0.00175678	-0.849746	DOWN	7.69349	12.8076	8.40088	12.3748	7	11.7985	12.9714	9.1472	10.4419	9.05528	14.164	11.8246	9.06878	13.4185	13.7767	7.66534	9.81378	9.88417	10.2935	6.49185	13.1349	12.1777	8.87958	12.8323	8.57743	12.7545	8.01123	10.8194	4.75489	12.5779	14.0964	6.98868	11.346	13.0026	8.20457	14.3168	8.17991	10.8704	14.5492	13.5445	8.81057	11.1731
APOE	1.8591	13.2135	6.36928	5.14401e-10	7.81889e-09	12.2484	UP	15.7508	13.6376	14.1706	13.914	10.8895	13.561	14.6063	8.9542	13.7587	10.643	15.2004	13.5283	13.8687	15.0723	12.8214	10.6008	13.2363	12.1225	11.4194	10.983	11.4035	15.504	12.1724	12.2837	13.2366	14.7454	10.774	11.1867	14.5473	15.2871	15.8542	14.6695	13.6498	11.5751	11.6275	12.9454	12.1867	9.25267	15.1484	11.9429	12.1144	14.5329
AQP10	-3.62015	3.09811	-8.7157	7.41852e-17	4.44122e-15	27.6141	DOWN	0	8.06609	0	8.56605	1	4.80735	2.58496	2.80735	0	0	3.58496	1	0	3.45943	1	3.70044	4.58496	3.70044	0	2.32193	3	2.80735	7.75489	7.85798	3.70044	4	3.16993	1	1	2	4.90689	1	2.32193	5.64386	1	1	3.80735	5.52356	3.90689	2	0	1
AQP2	1.89718	3.9058	3.54119	0.000444462	0.00170318	-0.81704	UP	1	4.24793	2	7.10852	2	2.58496	3.70044	10.9352	6.61471	7.13955	1.58496	0	5.39232	4.24793	3.16993	2.32193	4.45943	1.58496	5.20945	4.58496	9.25267	4.08746	1.58496	4.24793	3.32193	4	5.35755	1	3.90689	2.32193	1	1.58496	6.61471	5.39232	10.2009	3.16993	5.35755	4.70044	2.58496	3.32193	2	6.61471
AQP3	-1.31215	10.3627	-3.89423	0.000115133	0.000508386	0.443523	DOWN	8.0607	11.9801	10.683	9.23601	13.3344	9.35315	10.6742	10.9629	10.9039	9.84706	9.61102	7.69349	8.90388	11.1861	9.52356	10.6303	11.0941	7.62936	8.40514	10.9708	11.2633	10.7457	9.55842	9.9629	10.0471	9.30606	10.9708	12.6724	9.40939	8.67243	9.53138	9.56224	9.51373	12.3295	9.26679	8.85175	11.4305	8.12928	11.3821	7.09803	14.1688	11.3292
AQP4	-5.06153	2.72345	-12.2438	1.47471e-29	1.19817e-26	56.3371	DOWN	1	0	0	3	0	3.58496	4.08746	6.20945	0	0	1	1	0	3.80735	4.70044	0	5.93074	3.80735	1	1	5.08746	3.58496	0	5.32193	0	4.39232	1	3.32193	0	4.32193	2.80735	0	3.45943	4.9542	1.58496	3	0	4	1	4	5.08746	3.32193
AQP4-AS1	-1.15471	2.34389	-4.14785	4.0884e-05	0.000199389	1.41751	DOWN	0	0	1	4.45943	1	6.56986	3.32193	1.58496	3.16993	0	0	0	0	1.58496	2.58496	4.16993	5.97728	4.24793	4.70044	2	3.80735	4.80735	0	4.9542	0	5.04439	1	2.32193	0	0	2.80735	2.58496	2	3.70044	3.70044	4.58496	2.32193	7.7879	1	4.16993	1	3
AQP9	1.30648	7.60883	3.64411	0.000303083	0.00121105	-0.4611	UP	8.53916	10.9694	7.04439	10.8963	5.42626	8.82018	6.12928	4.08746	8.74483	5.55459	6.26679	8.40514	7.99435	7.12928	7.90689	6.74147	7.25739	3	5.9542	5.16993	6.47573	7.26679	6.14975	5.20945	7.46761	8.02237	4.75489	3.80735	12.2101	8.50383	6.37504	7.86419	6	11.2946	7.56224	5.08746	8.52748	6.78136	9.21189	4.52356	11.5265	10.8494
AR	-1.75176	7.31706	-5.83454	1.10247e-08	1.27269e-07	9.28167	DOWN	4.9542	7.56986	7.10852	8.06609	4.70044	6.97728	9.58496	6.06609	7.29462	4.08746	6.96578	7.81378	7.70044	8.29921	10.0821	5.24793	7.33985	1	6.49185	5	6.20945	7.03342	6.70044	9.34651	5.64386	3.70044	5.83289	7.33092	5.42626	9.41151	9.10329	5.97728	7.29462	10.9758	6.04439	10.6786	4.85798	6.37504	7.56986	7.92481	9.19476	4.16993
ARC	-2.9808	5.43447	-7.24859	2.1375e-12	5.17672e-11	17.58	DOWN	0	5.88264	2.80735	4.16993	5.2854	3.58496	5.72792	10.7773	5.04439	4.16993	5.39232	7.11894	8.47573	5.80735	7.08746	4.52356	3.70044	3.58496	5.80735	7.45121	6	9.2384	2.80735	7.01123	5.24793	5.42626	4.80735	4.85798	3	7.70044	4.39232	2.32193	7.19967	5.04439	6.89482	6.55459	5.12928	5.12928	4.90689	5.08746	5.93074	4.75489
ARFGEF3	1.27646	12.0672	6.41965	3.81283e-10	5.94648e-09	12.5388	UP	11.4051	13.6195	10.7482	12.2863	12.9529	13.0369	12.2793	11.3315	13.6995	12.3969	10.5177	12.5758	12.9493	13.902	10.9944	13.2779	12.6382	11.9005	12.7488	12.5241	11.8482	11.8967	12.7315	14.4155	12.2966	11.7969	12.2219	10.4838	12.0951	12.5423	12.4263	11.1954	13.0353	13.416	13.0716	11.8807	13.7971	11.6909	10.3794	9.11374	13.4464	11.941
ARHGAP10	-1.33576	9.90996	-7.21049	2.7406e-12	6.53073e-11	17.3378	DOWN	9.34651	10.3848	8.75822	9.94837	7.08746	10.4788	10.6064	7.78136	9.69349	8.93369	9.01123	10.6883	10.363	10.4656	12.4762	7.69349	8.96578	9.0954	10.3498	9.77149	8.45533	9.54303	10.5392	9.32418	9.45533	9.224	10.4041	8.57365	8.40939	10.668	10.3652	9.0607	9.22641	10.5048	9.10591	12.3788	10.9578	8.67948	10.3151	10.9672	10.7125	10.0701
ARHGAP11A	2.18475	10.8419	12.4703	1.90146e-30	1.9084e-27	58.3523	UP	10.3565	11.462	10.5255	11.5661	11.4351	12.021	10.6165	8.31288	12.2146	11.4486	9.59991	11.5167	12.0627	11.2192	9.56986	11.2609	10.5147	11.3886	12.3295	11.9028	9.69349	10.5999	10.69	12.4286	12.1244	11.0021	10.9766	8.98299	13.4432	11.2101	11.0217	12.2912	10.3309	11.611	11.7026	9.26444	12.3979	10.5887	8.65464	8.21917	11.0519	11.021
ARHGAP20	-1.40926	6.9955	-5.94943	5.8095e-09	7.08772e-08	9.90077	DOWN	5.83289	7.53916	6.64386	8.07682	3.70044	7.63662	9.32193	5.52356	7.80735	4	7.46761	7.56986	7.91289	8.43463	10.0954	4.52356	7.70736	4.16993	5.67243	3.90689	5.49185	7.37504	6.14975	5.80735	4	6.52356	4.08746	6.44294	6.58496	8.2384	7.02237	5.90689	6.80735	8.87958	6.52356	10.5821	5.64386	6.87036	6.78136	6.61471	8.30378	7.40088
ARHGAP27P1-BPTFP1-KPNA2P3	1.084	7.67296	5.87129	8.99196e-09	1.05954e-07	9.47856	UP	6.83289	5.2854	6.9542	7.99435	9.35535	8.86419	8.69349	6.9542	8.76155	5.61471	6.22882	7.96	9.11374	7.94251	8.33539	7.7879	7.25739	7.76155	9.08746	7.91886	8.12928	9.13955	7.93664	7.21917	7.02237	7.6865	8.40088	6.47573	6.59991	7.85175	8.63662	8.73809	5.78136	8.02237	7.67243	8.08746	8.12412	10	6.72792	6.76818	8.58871	8.09803
ARHGAP39	1.50866	10.1554	8.84391	2.84579e-17	1.84619e-15	28.5525	UP	9.49985	10.2444	9.47371	10.9091	12.327	12.9291	9.56033	7.88264	11.3597	11.4979	9.76818	11.3734	11.6096	10.7764	9.52748	9.41574	10.6266	8.58871	11.6165	11.8811	9.11634	10.0403	10.3276	12.0668	11.3365	10.4676	10.5868	8.12928	12.3872	11.4848	10.6573	11.4998	10.3945	9.58684	10.9908	9.13186	11.5425	10.3565	10.021	8.81378	9.96578	10.2784
ARHGAP8	2.30469	7.6422	11.1896	1.60667e-25	4.93929e-23	47.1954	UP	6.37504	3.32193	7.64386	9.01123	9.1267	9.79766	7.97728	5.67243	9.46352	7.32193	5.93074	7.39232	8.40088	7.24793	6.79442	7.41785	9.33762	7.11894	8.91588	8.08215	7.49985	7.40939	9.18488	7.10852	7.19967	9.80252	8.07682	7.08746	9.0634	7.17991	8.73471	8.23362	6.52356	8.59991	7.57743	7.66534	9.41151	7.8009	7.22882	5.72792	8.27612	7.88264
ARHGDIG	-2.84665	5.20344	-6.14305	1.93015e-09	2.57383e-08	10.9669	DOWN	3	4.85798	1.58496	2.80735	4.32193	2.32193	3.70044	7.56986	4.08746	9.50383	5.24793	4.70044	6.08746	9.42417	6.89482	3	6.49185	0	3.16993	10.2796	5.52356	3.90689	3.32193	4.39232	7.35755	5.9542	4.52356	5.16993	2.58496	5.75489	4.45943	3.70044	9.38586	5.80735	9.39017	6.87036	6.91886	5.88264	4.52356	3.70044	5.08746	3.16993
ARHGEF25	-1.7597	8.78368	-6.72148	6.10175e-11	1.13222e-09	14.3181	DOWN	7.5157	9.36194	7.71425	10.1687	7.87652	9.04985	9.83447	5.97728	9.20212	6.16993	8.88264	9.66711	8.14975	8.97154	12.5755	7.08746	7.93074	5.85798	8.62936	6.65821	6.74147	9.40727	7.94251	8.29002	6.71425	8.40514	5.64386	6.79442	7.6865	10.2009	10.66	7.82655	9.23362	9.24793	7.26679	12.4873	6.56986	5.88264	9.89026	10.2252	9.70908	7.14975
ARHGEF26	-2.00395	8.74846	-6.7874	4.05456e-11	7.77727e-10	14.7155	DOWN	3.80735	9.04439	6.37504	9.99152	7.42626	9.3015	8.71425	8.84235	9.5812	7.52356	8.15987	10.1824	7.66534	8.18488	12.5462	9.23601	8.44708	7.30378	8.28077	8.94837	8.17493	9.35975	7.31288	9.73978	7.35755	7.31288	5.12928	8.30834	3.58496	9.72451	8.51964	6.91886	7.27612	9.91588	8.59246	12.6291	8.6865	8.7039	9.28309	10.9144	10.1724	8.75154
ARHGEF26-AS1	-1.91015	3.73624	-5.51806	6.11449e-08	6.06896e-07	7.62931	DOWN	0	3.16993	2	5.04439	3.58496	7.62936	4.52356	4.70044	3.58496	2.80735	3.32193	5.39232	2	3.32193	7.33092	5.04439	6.56986	2.32193	4.85798	4.08746	2.58496	6.52356	1	4.80735	0	4.32193	0	3.58496	1.58496	4.08746	5.16993	1	2.80735	4.45943	4.52356	6.83289	1.58496	6.98868	4	6.02237	3.70044	3.58496
ARHGEF37	-1.66314	9.77344	-8.79014	4.25803e-17	2.63226e-15	28.1578	DOWN	7.10852	9.11894	7.5157	9.11634	10.8502	10.4747	11.0755	7.49985	10.9643	9.5216	8.54303	9.31741	9.50184	11.9326	12.0417	9.15228	10.9293	8.58496	8.66888	10.0539	8.47978	9.17991	10.703	9.26679	9.50581	9.74147	10.1636	8.92481	7.98299	9.9571	8.67948	8.79442	8.27612	8.87958	10.0661	11.4944	10.2726	8.38802	10.1762	9.60363	9.63118	10.2808
ARHGEF38	2.37832	8.87206	9.57505	1.01719e-19	1.0003e-17	34.0756	UP	7.59991	7.35755	7.93664	7.22882	8.5157	11.0735	10.8796	8.77149	11.1196	9.69174	8.40088	8.55075	8.07146	10.1033	7.43463	10.9114	9.02514	9.45121	8.71081	8.69	8.01681	9.67948	10.7448	9.97011	9.29692	8.15987	9.71425	7.39232	10.6008	8.18982	6.50779	9.31741	7.63662	10.6944	8.98014	9.04985	10.2992	9.85643	8.19476	7.29462	10.1674	9.76653
ARHGEF38-IT1	1.79605	2.9884	6.32975	6.49833e-10	9.6707e-09	12.0217	UP	2	1	2.32193	1.58496	1	5.20945	4.90689	4.52356	4.32193	4.64386	3.45943	4.75489	1.58496	3.32193	3.45943	3.80735	4.90689	3	3.45943	4.70044	3.45943	4.39232	4.24793	3	3.58496	4.45943	2.80735	3.32193	4.58496	1	1.58496	4.32193	3.32193	3.58496	3.70044	2.58496	5.70044	5.35755	1.58496	2	4.45943	3.80735
ARHGEF4	-1.41806	8.50537	-3.97347	8.37961e-05	0.000380753	0.741763	DOWN	3.70044	8.38802	5.16993	9.79442	11.7275	8.46352	8.40514	7.90087	9.96145	6.89482	7.33985	8.30378	10.8719	9.39446	10.66	4	6.96578	3.70044	5.70044	10.3509	6.35755	10.7448	8.93664	10.3696	9.90689	8.04439	9.15482	10.1163	4	9.16491	9.17243	5.85798	7.29462	8.633	6.35755	11.2621	7.70044	7.35755	7.33985	9.00562	9.55075	5.52356
ARL14EPP1	1.07612	2.83048	5.20816	3.03654e-07	2.57631e-06	6.08835	UP	1	3.58496	2.80735	3.45943	2.58496	4.32193	4.45943	3	5.75489	1	2.32193	3.90689	2.32193	2.58496	4.08746	3.58496	3.90689	2.58496	3.58496	1	3.16993	3.45943	3.80735	3.90689	4	1	2.80735	1	3.32193	1.58496	4.24793	1.58496	0	1	2.58496	3.32193	3	4.24793	1	2	3.80735	3.32193
ARL4D	-2.12172	7.04057	-7.27885	1.7534e-12	4.33888e-11	17.773	DOWN	4.52356	7.54689	5.32193	7.72792	8.15482	8.19476	7.17991	8.18488	7.66534	6.47573	7.26679	7.06609	8.19967	6.49185	10.5859	3.90689	6.35755	5.16993	5.35755	4.39232	6.88264	6.91886	6.35755	5.24793	3.80735	6.98868	6.39232	8.23362	2.58496	7.9542	8.41785	5	6.93074	8.5157	4.70044	10.0715	4.08746	7.19967	7.56986	8.66534	6.79442	5.39232
ARMC3	1.68643	4.4467	4.67713	3.966e-06	2.4017e-05	3.63033	UP	2.32193	6.84549	0	6.80735	7.24793	8.43463	5.55459	2	6.70044	4.45943	0	1.58496	5.85798	2	5	3.90689	6.72792	4.39232	5.61471	1.58496	5.20945	7.27612	7.67243	4.70044	5.20945	5.16993	4.24793	5.88264	0	0	6.53916	1	5.80735	3.16993	4.32193	4.90689	6.98868	7.43463	5.78136	4.08746	3.90689	3.58496
ARMCX1	-1.42051	8.42766	-7.15816	3.84963e-12	8.88801e-11	17.0068	DOWN	7.25739	9.76155	7.37504	8.91289	6.24793	7.96578	9.43879	6.39232	8.73471	5.52356	8.41785	8.71768	7.54689	8.84235	11.3304	6.97728	7.89482	7.76818	8.15987	6.12928	8.17493	8.21432	7.64386	7.40088	6.78136	6.37504	5.93074	7.40939	7.33092	9.68475	9.20457	7.52356	8.10852	9.35975	7.35755	10.6786	6.24793	8.24317	8.55075	8.99152	8.88264	7.42626
ARPC1B	1.05004	13.4333	7.17993	3.34305e-12	7.81387e-11	17.1442	UP	13.2046	13.2677	12.5988	13.0458	13.1238	14.186	14.1836	11.5093	13.945	13.5564	13.6226	13.7645	13.4422	14.0019	13.964	11.3945	13.3021	13.3226	13.0646	12.7624	12.8267	13.6977	14.4663	13.4982	14.0588	13.2543	13.5704	11.7924	13.2834	14.6918	14.8532	14.0774	13.1759	13.2143	13.8834	12.4515	14.0909	12.2327	14.5271	11.6542	13.2949	13.9298
ARPP21	-1.41307	1.47289	-4.77149	2.55408e-06	1.75823e-05	4.04996	DOWN	1	1	1.58496	2.32193	0	1	2.58496	0	2.32193	0	1	3.16993	0	2.32193	6.65821	0	4.52356	0	2.80735	0	1	4.58496	0	1	0	1	0	0	0	1.58496	0	0	0	0	2	3.45943	0	5.85798	2	4.75489	0	1
ARRDC4	-1.02804	10.7665	-5.86863	9.12566e-09	1.07418e-07	9.4643	DOWN	9.15735	10.9069	9.57743	11.8361	11.9274	11.2515	12.0901	10.6847	10.9009	10.2456	10.2408	11.233	10.6156	12.0272	12.6289	11.5608	10.1548	9.53333	9.69	11.2095	10.2336	9.46761	11.8017	11.617	11.1306	9.31288	9.42206	8.87958	11.3089	11.3292	9.83289	11.0279	9.54303	11.716	9.24793	12.6064	11.4528	9.15735	10.9016	10.544	9.97154	12.9473
ARSF	-1.33682	1.90678	-4.30927	2.0568e-05	0.000107187	2.0668	DOWN	0	1	0	2.80735	0	1.58496	3.45943	2.58496	2.58496	1.58496	1.58496	1	1	2.32193	3.70044	3.45943	4.90689	0	1.58496	1	2	4.08746	0	1	3.80735	2.32193	0	4.90689	2	0	1.58496	1	2	1.58496	2	1	0	4.24793	2.58496	2.32193	1	1
ARSL	1.78246	9.58728	5.01769	7.83311e-07	6.04881e-06	5.17983	UP	9.18735	12.5767	9.76818	10.1098	7.96578	11.0795	11.0519	7.56986	12.5653	8.85798	10.4179	9.78627	3.16993	10.4062	9.28077	12.4996	10.7863	11.8368	11.5382	8.16491	7.08746	9.94544	11.3292	12.1039	11.1351	9.66534	10.1357	8.46761	8.30378	10.1824	8.87652	8.8009	11.0593	10.1306	9.11634	9.25503	10.3117	9.77808	11.0654	9.09011	6.97728	8.2854
ART3	-1.54133	4.35533	-4.8019	2.21299e-06	1.54303e-05	4.18678	DOWN	3.32193	1.58496	5.16993	6.37504	2.32193	5.64386	3.80735	4.45943	2.80735	4.64386	2.80735	7.16993	3	5.64386	5.93074	5.52356	5.93074	4.9542	7	3	3	4.70044	2	2.80735	3.80735	2.58496	0	4.32193	2.80735	8.97154	3.16993	3.58496	3.90689	3.58496	3.16993	5.24793	4.16993	6	5.12928	5.72792	2.58496	2.80735
AS3MT	-1.66471	3.4143	-5.29949	1.90829e-07	1.69359e-06	6.53444	DOWN	1	5.80735	2.32193	6.30378	5.64386	5.61471	5.12928	1	5.12928	1.58496	1	3.58496	1.58496	2.32193	5.39232	2.32193	4.08746	3.80735	0	2.32193	3.32193	4.32193	3.80735	6.67243	2.58496	4.90689	2.32193	3	1	5.52356	6.18982	1.58496	4.08746	3	4.08746	5.64386	3.16993	4	2	4.58496	4.24793	3.16993
ASAH2	-2.09645	6.59717	-7.4989	4.0775e-13	1.14143e-11	19.1953	DOWN	6.20945	5.2854	5.24793	7.55459	7.30378	8.25267	9.28077	6.24793	4.70044	6.22882	7.55459	7.74147	6.79442	6.56986	3	7.19967	6.39232	7.50779	7.43463	7.31288	5.61471	6.9542	6.56986	6.97728	7.65105	6.44294	5.35755	5.52356	6.30378	6.70044	7.48382	7.53916	3.32193	8.09276	7.35755	4.45943	7.32193	6.61471	3.58496	5.08746	6.2854	6.10852
ASAP3	-1.06872	9.68261	-5.78308	1.4642e-08	1.64735e-07	9.00765	DOWN	7.87036	9.64386	7.94251	10.2668	9.72622	10.8796	10.8114	8.71081	9.41574	9.54496	9.60363	8.50779	10.3652	11.4742	11.3498	8.96578	10.1886	8.31288	8.46352	9.58496	9.97441	8.64024	9.70217	11.0314	7.79442	9	9.44501	8.96	7.15987	10.3923	10.4717	8.56224	8.06609	9.9901	9.54303	9.82972	10.6591	9.11894	9.12153	8.42626	10.6883	7.82018
ASB11	-2.37394	2.2796	-7.75212	7.32122e-14	2.35023e-12	20.8714	DOWN	2.80735	1.58496	1.58496	3.16993	1.58496	3.32193	4.45943	1.58496	2.80735	0	0	2.32193	0	4.39232	1	3.90689	6.22882	0	3.32193	1	1	4.64386	1	3.90689	2	1	1	2.58496	0	4.45943	1.58496	1	2	2.80735	4	1	2.32193	5.39232	1	3.45943	5.42626	2
ASB15	1.09514	1.85553	3.54308	0.000441376	0.00169211	-0.810572	UP	0	1	0	5.20945	1	2	3.45943	0	2.58496	2	0	0	1.58496	0	2.80735	5.20945	6.42626	2.32193	5.45943	1	1.58496	7.14975	2.58496	3.90689	2.80735	2	0	0	2	0	1.58496	2.32193	0	2.80735	4.75489	1.58496	2.32193	6.93074	0	4.39232	1	1
ASB2	-2.48686	8.74152	-7.54295	3.03333e-13	8.81682e-12	19.4839	DOWN	8.57743	8.64746	8.88874	9.77149	4.45943	8.29921	10.2143	6.26679	9.26444	6.58496	9.49386	10.1599	7.59246	10.3869	13.7655	6.22882	8.74147	6.71425	6.32193	4.58496	7.25739	9.43045	5.93074	7.10852	6.2854	8.23362	7.05528	6.16993	7.31288	10.3465	8.79116	8.50779	9.06609	9.14466	7.53138	13.6966	8.59991	7.05528	10.4073	12.0165	6.98868	8.77479
ASB5	-3.71849	4.06169	-6.18987	1.47257e-09	2.01603e-08	11.229	DOWN	3.58496	7.26679	6.22882	8.09803	0	1	3.58496	0	7.04439	2.32193	0	10.2228	1	4.64386	9.74651	2.32193	5.32193	0	3.58496	0	3.58496	4.90689	0	0	1	3.45943	4.80735	2	0	9.52356	1.58496	0	5.85798	8.3443	1.58496	11.4625	2	5.9542	5.35755	8.91289	1	1
ASCL1	-1.48523	3.38708	-3.33151	0.000942779	0.00331698	-1.51245	DOWN	2.80735	13.9963	2.80735	5.93074	3.70044	6.59991	5	4.08746	5.67243	0	3.16993	0	1.58496	5.52356	3.70044	1.58496	4.32193	5.04439	1	1	6.22882	3.58496	0	15.4401	2	7.88264	3.90689	5.67243	1.58496	3	3.90689	2.32193	2.58496	1.58496	3.16993	4.64386	5.78136	3	0	2.32193	2.32193	4
ASCL2	2.26379	9.46089	5.12183	4.68233e-07	3.80204e-06	5.67288	UP	8.13443	11.2969	7.36632	11.1092	13.1978	12.2183	8.41363	4	13.0069	8.6865	11.6996	10.8502	7.36632	10.7944	10.7599	11.6479	8.3837	6.64386	13.1701	10.8903	6.72792	11.7048	8.65105	12.643	12.6062	7.04439	11.3454	6.83289	7.11894	8.42206	10.3151	11.2963	10.0607	8.34873	8.17493	10.021	10.9136	12.7655	8.59619	11.543	8.04439	8.98584
ASF1B	1.9622	10.5898	9.52059	1.5625e-19	1.46481e-17	33.6546	UP	11.5689	11.817	10.1699	10.5236	11.4294	11.3078	10.0238	8.12412	11.0014	11.5741	10.703	11.0175	10.7108	11.3961	8.47573	10.9151	10.6303	10.2691	11.9136	11.7657	9.95565	11.1098	12.314	12.2773	11.7908	10.9084	11.7436	8.48784	11.7288	12.0227	10.196	12.2294	10.8178	10.6546	11.5416	7.75489	11.9001	10.8258	11.3449	7.88874	9.86419	10.6339
ASIC5	-1.58637	1.00961	-6.35598	5.56544e-10	8.39961e-09	12.172	DOWN	0	3.80735	0	2.32193	0	2	2.32193	0	0	1.58496	0	0	0	0	0	1	4	0	1.58496	0	0	2.58496	0	2.80735	0	0	1	0	0	0	0	0	0	0	0	7.09803	0	4.45943	0	2.58496	0	0
ASNSP1	1.0833	1.43609	3.21589	0.00140437	0.00472284	-1.87872	UP	0	0	1	4.24793	4.75489	7.59991	0	0	1	2	0	1	1	1	1.58496	2.32193	4.80735	0	1.58496	2.32193	5.72792	3	0	2	1	6.22882	0	1.58496	0	3.80735	1	2	0	1	1.58496	1	1	6.47573	0	2.58496	1.58496	0
ASPA	-2.90982	6.30397	-10.5758	2.95647e-23	5.86549e-21	42.0705	DOWN	7.74147	5.16993	5.88264	5.42626	2.32193	6.02237	8.56224	4.85798	6.52356	3.32193	7.82655	6.32193	5.16993	7.55459	8.91588	4.39232	6.78136	6.58496	3.80735	3.16993	5.80735	5.2854	5.67243	7.27612	2.80735	5.04439	7.03342	7.10852	2.32193	6.50779	7.87036	4.80735	4.9542	5.80735	5.45943	7.94837	6.67243	5.88264	5.20945	6.45943	7.45943	6
ASPDH	-1.46906	4.0213	-6.01909	3.9207e-09	4.92237e-08	10.2811	DOWN	1	4.39232	2.32193	4.52356	2.32193	3	6.45943	1	4.70044	2.80735	3.16993	3	4.9542	3.16993	4.90689	4.39232	5.70044	1.58496	5.64386	5.58496	3.80735	3.70044	4.24793	6.06609	3.90689	3.16993	3.58496	2.32193	3	2.32193	5.75489	3.58496	1	4.08746	4.85798	6.02237	4.39232	6.22882	3.45943	3.70044	5.61471	3.80735
ASPG	-1.45291	5.44595	-4.08949	5.21294e-05	0.000248653	1.1884	DOWN	3	3.70044	2	7.54689	9.5157	6.82018	5.35755	8.31288	4.52356	3.16993	5.78136	5.61471	4.45943	9.21675	4.32193	4.16993	5.55459	4	8.03892	5.72792	7.07682	5.45943	3.80735	10.1762	5.78136	6.10852	3	6.49185	3.45943	4.39232	4.64386	4.16993	5.75489	4.75489	8.50383	4.52356	6.16993	6.87036	3.58496	4.58496	4.24793	3.58496
ASPHD1	1.67718	9.17019	5.29143	1.98866e-07	1.75669e-06	6.4948	UP	9.65642	10.8533	9.44501	9.53333	10.7632	9.64746	8.64746	9.66711	10.7649	9.59805	7.22882	10.2761	10.6573	8.31288	9.38586	6.91886	10.5803	9.9542	8.49586	9.00843	10.4584	7.31288	10.0993	12.0624	5.55459	9.24079	9.91588	7.55459	5.49185	10.5517	11.4147	9.75656	10.8572	7.33985	10.8903	8.57743	11.5196	8.45121	12.1154	5.08746	9.06609	9.35975
ASPM	2.90979	10.8786	13.3611	5.19906e-34	1.10883e-30	66.4254	UP	10.733	11.3859	10.5008	11.7258	11.7398	12.7885	11.0369	8.18982	12.6357	11.0954	8.93369	12.4455	12.5194	12.3351	9.15735	12.1491	10.8704	11.1434	12.6704	11.8254	9.30378	9.99435	12.1561	13.1964	12.2231	11.4522	11.0614	9.17493	12.242	11.6493	11.7211	12.2192	10.9564	11.8053	11.8723	8.72792	11.9578	11.0189	9.42626	8.53138	11.5058	11.446
ASPN	1.30839	11.0527	4.2465	2.6936e-05	0.000136638	1.81162	UP	9.70217	10.5421	10.2958	13.0636	9.89785	11.6221	11.4194	8.19967	13.5548	6.52356	10.1459	12.218	11.5675	12.1254	15.0674	9.32643	11.0389	7.40088	10.1935	8.30834	8.71768	10.1124	10.7305	12.5174	10.0348	7.09803	8.82972	7.90087	9.59619	12.9656	13.7487	12.3154	11.0539	12.581	9.24793	14.6866	8.42626	8.05528	12.2183	13.6796	11.9993	9.54496
ASS1P1	1.17342	4.21605	5.45465	8.53912e-08	8.1989e-07	7.30775	UP	3.90689	3.90689	5.04439	4.16993	4.70044	4.32193	7.44294	3.58496	3.16993	3.32193	4.24793	3.45943	5	4.16993	5.32193	6.39232	5.72792	1	4.08746	3.80735	3.32193	5.08746	3.80735	4.85798	5.49185	2.80735	6.18982	3.45943	2.58496	6.14975	5.39232	6.52356	1.58496	4.75489	3.45943	4.80735	5.24793	5.2854	4.9542	4.70044	4	4.80735
ASS1P2	1.02015	4.20769	5.84091	1.06427e-08	1.23276e-07	9.31573	UP	2	3.32193	3.32193	6	5.16993	5.55459	6.32193	3.16993	5.32193	3.32193	2.80735	3.16993	4.64386	2.80735	5.97728	4.70044	6.30378	3.16993	5.20945	3.45943	3.58496	6.39232	4.52356	5.16993	3	3.58496	2.58496	2.80735	4.08746	3.16993	4.58496	4.16993	2.32193	4.39232	4.70044	4.75489	5.16993	7.19967	2.80735	4	4.85798	4.32193
ASTN1	-2.20638	4.15336	-5.34403	1.51789e-07	1.3761e-06	6.75442	DOWN	0	7.59246	3.80735	8.69697	9.55842	11.2234	9.02237	3.70044	2.58496	3	6.32193	5.20945	3.16993	5	9.39446	2.80735	6.58496	1	3.16993	0	2.32193	4.80735	1.58496	5.55459	1.58496	1	0	2.58496	2	5.52356	8.82337	2.32193	3.70044	6.71425	5.04439	6.67243	3.90689	8.70044	4.16993	5.55459	2	5.42626
ASXL3	-1.66008	5.55227	-5.8552	9.83209e-09	1.14822e-07	9.39227	DOWN	3.16993	5.90689	4.75489	7.29462	1	5.72792	6.96578	5.35755	5.64386	4.90689	5	6.61471	6.40939	7.16993	8.89482	4.85798	6.78136	2.58496	4.32193	2.80735	4.80735	5.2854	4.45943	6.67243	3.45943	3.45943	2.80735	5.52356	3	6.70044	6.14975	7.85175	3.45943	6.70044	5.20945	8.37504	4.52356	7.49985	4	7.31288	7.8392	4.45943
ATAD2	1.88767	11.6504	12.0652	7.32182e-29	5.2052e-26	54.7609	UP	10.8857	12.3069	11.7867	11.9095	13.3856	13.8769	11.3669	9.03067	13.2915	12.265	10.6119	10.1824	12.7595	12.3473	10.7432	12.3177	11.421	11.2779	12.4378	12.3318	10.8114	11.6452	12.577	13.8908	12.8516	11.851	11.683	10.1536	14.3417	12.8425	11.526	12.5447	10.4666	14.4479	12.8719	10.2715	12.7217	12.2831	10.4707	9.54689	12.1954	11.3923
ATAD3B	1.00478	10.2388	6.55462	1.6938e-10	2.82361e-09	13.3263	UP	10.2621	9.19967	8.66534	9.99859	10.5661	10.9009	10.8734	10.0224	11.007	11.3072	9.59432	9.65284	10.5632	10.5821	10.3576	9.26679	9.99859	10.6184	11.4414	10.2228	10.102	10.8041	11.7347	10.3977	10.66	11.4294	9.78627	9.37721	12.0314	10.0701	10.933	11.6411	9.72962	8.40939	11.3055	9.30606	11.8447	10.2912	10.3083	8.03892	10.6165	10.098
ATAD5	1.631	9.53155	11.4048	2.49087e-26	9.55038e-24	49.028	UP	8.72451	8.633	8.97728	10.4367	10.6564	10.9352	10.2408	7.36632	10.858	8.61102	8.13443	9.92333	9.89936	10.1787	9.54496	9.90388	9.98157	9.1267	10.6294	9.50779	8.36632	9.53722	10.8494	10.9986	10.4019	10.4041	9.60177	8.7211	11.4294	8.96867	9.56033	10.5157	7.98868	9.82496	10.3641	9.14466	10.7194	10.703	9.03067	7.98868	10.0334	9.79442
ATCAY	-1.53466	3.5808	-5.08391	5.6528e-07	4.51008e-06	5.49232	DOWN	2	1.58496	2.32193	5.90689	3.16993	2.32193	5.32193	1.58496	2.32193	1.58496	2	4.39232	1.58496	4.58496	7.13955	3.90689	7.5157	2.80735	5.32193	3.45943	1	6.6865	2.58496	4.75489	0	2.58496	2.32193	2	0	3.45943	4.16993	2	1.58496	3.90689	2	5.90689	3.32193	8.45943	3.70044	4.70044	3.16993	2
ATOH1	1.20947	4.91164	2.0621	0.039833	0.0853981	-4.84984	UP	2.32193	7.54689	3.80735	4.90689	4.80735	6.44294	8.35755	5.85798	8.42626	5.55459	5.78136	1	2.58496	11.3197	6.20945	10.0661	2.32193	6.75489	9.17243	5.78136	5.12928	9.58684	5.64386	9.29692	7.49985	2.32193	5.97728	3	0	5.90689	1.58496	2	3.16993	5.20945	5.9542	5.58496	4.16993	7.07682	1	6.42626	11.4083	6.40939
ATOH8	-2.21572	7.5284	-8.60956	1.62848e-16	9.10986e-15	26.8442	DOWN	5.85798	9.59805	5.75489	6.76818	8.70044	7.29462	10	6.2854	7.61471	5.9542	8.78463	6.58496	5.64386	8.19967	10.2761	5.16993	7.20945	4.70044	5.97728	4.70044	8.86109	7.25739	5.49185	9.13955	4.90689	6.2854	4.75489	6.98868	4.39232	8.65105	8.45943	5.16993	6.59991	8.9571	6.93074	10.3597	7.16993	6.40939	8.70044	9.25267	9.10066	7.91886
ATP10B	1.1645	11.2611	2.73637	0.00648437	0.0181015	-3.26578	UP	11.4863	11.4184	8.20457	9.91289	10.0741	13.3626	12.5746	8.71425	12.3628	7.25739	11.6595	8.93958	11.584	14.2365	10.2456	14.7926	10.4747	11.9516	13.9427	12.4979	9.53138	11.0868	13.1641	11.5651	13.5435	9.48583	11.8293	9.49985	7.25739	13.8898	7.43463	13.7976	8.59991	10.7039	14.1162	9.92778	11.0286	12.1923	11.9484	11.3783	12.5957	11.7453
ATP11A	1.78257	13.0205	10.9157	1.67884e-24	4.37319e-22	44.889	UP	13.3526	13.0899	12.6371	14.0691	15.6003	14.8716	13.481	11.3202	14.2513	11.8412	10.9901	12.5066	13.6238	13.5087	12.1833	12.5587	12.9739	13.0119	12.7545	12.5442	12.7891	12.8564	14.5616	11.8053	12.6622	14.099	12.4986	11.6506	13.6398	12.9935	13.7144	12.849	12.3931	14.5687	12.7694	11.6952	13.9789	11.9944	11.7528	11.2101	13.1102	13.4049
ATP13A3	1.09404	13.1509	9.59101	8.96691e-20	9.02616e-18	34.1993	UP	12.0028	13.4974	12.9744	13.6388	14.7516	14.8233	13.253	12.77	14.5778	12.2624	11.3415	12.9968	13.8993	13.2962	13.3993	13.3181	13.3749	13.3301	13.5093	13.1256	12.8519	13.1649	14.1822	14.7411	12.0526	13.8427	13.346	10.9823	14.3006	13.7057	13.6204	13.5773	12.0604	13.9697	13.7378	12.7011	14.2332	12.9018	12.7288	11.1163	14.2229	13.3534
ATP13A4	-1.1576	6.83103	-2.60382	0.00955667	0.0253114	-3.61127	DOWN	8.3443	5.78136	8.50383	6.04439	4.58496	9.40727	8.40088	7.06609	7.62205	3.32193	6.97728	3.45943	3.45943	9.37721	6.32193	5.42626	11.3471	9.13699	4.85798	8.15482	9.57365	6.58496	5.58496	4.58496	6.79442	10.3219	5.55459	8.03342	2.58496	4.39232	5.32193	3	5.20945	9.82496	5.49185	5.52356	8.87958	8.45533	9.04985	5.39232	8.96	7.54689
ATP13A5	-1.8607	2.34311	-5.67985	2.57143e-08	2.74726e-07	8.46419	DOWN	2.32193	1	2.80735	3.58496	2.32193	2.58496	3.70044	2.32193	2.32193	0	0	0	2.32193	5.39232	2	1.58496	5.32193	3.32193	3.45943	2	5.83289	4.70044	1	2.32193	1	3.32193	1	2.32193	0	0	3.16993	0	0	3.58496	2	2.58496	4.90689	5.70044	1.58496	4	4.45943	3.16993
ATP1A2	-4.0326	7.12586	-8.68464	9.34377e-17	5.47847e-15	27.3881	DOWN	3.70044	7.64386	5.78136	7.67948	3.90689	6.45943	7.03342	5.67243	9.70217	4.16993	8.29921	9.13955	5.2854	7.45943	12.8453	4.45943	7.2854	1	4.9542	0	6.06609	8.82972	4.90689	6.39232	3.45943	2	5.67243	6.30378	1	9.46964	8.65464	4.75489	8.54689	7.08746	6.87036	13.5474	3.16993	8.29921	8.22882	11.2802	6.45943	5.67243
ATP1B2	-1.76462	7.44169	-7.2599	1.98507e-12	4.84885e-11	17.6521	DOWN	5.90689	7.59246	6.18982	8.71081	6.18982	7.43463	10.445	6	7.71425	4.32193	7.97154	8.61839	5.55459	6.62936	10.1254	5.70044	7.32193	5.12928	5.67243	5.67243	5.39232	9.85643	6.58496	7.14975	5.78136	7.19967	5.20945	6.04439	5.39232	8.54303	9.11894	5.24793	8.03342	7.59991	7.53916	10.0084	5.80735	6.80735	7.6865	7.67243	7.26679	7.13955
ATP2A1	1.43772	6.60168	7.05973	7.2585e-12	1.58979e-10	16.3892	UP	6.71425	6.75489	6.37504	7.17991	6.72792	6.87036	7.7879	6.30378	7.07682	6.37504	5.52356	6.64386	8.9629	6.30378	6.33985	6.37504	7.54689	5.90689	7.57743	7.59246	6.35755	8.50383	9.79279	9.3837	6.2854	6.67243	5.67243	3.32193	7.78136	4.90689	7.10852	7.46761	3.90689	6.06609	7.2384	6.39232	8.49185	9.26209	5.55459	5.35755	7.72792	6.2854
ATP2B2	-1.87489	3.60779	-6.41939	3.81868e-10	5.95289e-09	12.5373	DOWN	2.32193	3	2.58496	5.61471	6.82018	2.80735	4.70044	5.12928	3.80735	0	3.58496	3.45943	3.90689	4.85798	5.90689	2.32193	6.16993	1.58496	3.58496	1	3	5.45943	1	9.34207	3.70044	2.58496	0	1.58496	1.58496	3.70044	4.64386	2.58496	2.80735	3.16993	4.52356	5.49185	3.16993	6.74147	1	5.39232	4.16993	2.80735
ATP2B3	-1.49222	2.20275	-5.13102	4.47254e-07	3.64077e-06	5.71684	DOWN	2	4.9542	1	3.16993	1	2	3	0	2.58496	0	2.32193	4.39232	2.32193	2	6	1	3	0	0	0	3.32193	3	2.80735	10.4543	0	0	0	2.58496	1.58496	2.32193	2	1	0	1	1.58496	4.70044	2	5	2.58496	3.58496	4.58496	2.32193
ATP4A	-5.64681	4.47323	-8.51266	3.31938e-16	1.78098e-14	26.1471	DOWN	1	2.58496	3.80735	4.45943	4.45943	2.32193	4.80735	8.91289	1	0	3	1	6.83289	10.7381	1	2	10.0293	1.58496	3.45943	2.32193	0	4.32193	3.45943	4.39232	1	5.90689	1	11.4184	2	10.5546	3.32193	2.58496	7.04439	0	1	2	3.58496	6.6865	1.58496	3.90689	12.5287	1.58496
ATP4B	-5.58061	4.10488	-8.2169	2.82095e-15	1.2373e-13	24.0535	DOWN	0	4	2.80735	2.80735	2	2	2	9.12928	1.58496	3.32193	4	3.16993	5.35755	9.72281	1	0	10.1774	1	2.32193	4.16993	5.61471	4.39232	2.58496	6.12928	5	5.97728	0	11.2155	1	9.53333	2.58496	1	7.24793	3.16993	1.58496	2	3.16993	2.80735	0	2.80735	11.3998	2
ATP6V0D2	2.29752	5.76064	7.17639	3.42065e-12	7.96767e-11	17.1219	UP	7.94251	7.01123	5.42626	7.31288	3.16993	6.98868	8.14466	4.52356	7.18982	5.24793	8.26209	5	5.16993	6.2854	0	6.87036	6.65821	4.64386	6.08746	5.16993	4.64386	8.49586	4.90689	5.83289	6.24793	6.02237	5.93074	1	7.5157	7.18982	5.45943	7.7211	4.58496	5.16993	7.22882	2.58496	5.2854	8.26209	6.22882	3.58496	5.45943	8.36194
ATP6V1B1	1.27803	5.38779	4.06296	5.81645e-05	0.000274296	1.08522	UP	5.32193	3.80735	3.16993	8.11894	9.43045	8.99152	6.30378	5.75489	4.39232	2.58496	3.16993	3.58496	3.70044	2.32193	5.90689	4.90689	6.91886	4.9542	5.70044	6.44294	8.13955	7.91886	5.12928	10.888	3.58496	5.55459	9.93517	4.16993	2.32193	4.39232	5.72792	3.58496	5	8.2384	5.67243	5.24793	3.80735	8.69	5.32193	4.39232	6.93074	4.08746
ATP6V1C2	1.18589	7.97793	4.3059	2.08694e-05	0.000108542	2.05303	UP	5.80735	7.44294	5.35755	7.97728	9.64024	9.49985	7.29462	11.0049	8.17493	6.91886	8.73809	7.29462	6.83289	10.1636	7.46761	9.37504	7.05528	7.70044	9.86882	10.6284	8.92184	8.62936	7.67948	9.66356	9.95274	7.70044	7.07682	6.37504	6.18982	7.37504	8.55842	8.24793	8.81698	9.04439	8.78463	8.15987	9.43879	9.48382	7.67243	8.56986	8.25267	7.37504
ATP6V1G2	-1.57027	4.75806	-6.90678	1.91939e-11	3.90795e-10	15.4428	DOWN	2.58496	8.58496	3.32193	5.72792	5.32193	4.52356	6.65821	2.58496	5.2854	3.32193	6.10852	6.12928	4.45943	4.9542	7.78136	4.80735	5	3.32193	2.80735	6.37504	4.39232	5.16993	4.39232	5	4	3.90689	3	3.58496	3.16993	4.70044	5.61471	4.52356	4.70044	5.32193	4.32193	6.53916	4.58496	4.39232	5.16993	5.78136	3.45943	3.90689
ATP8B2	-1.01343	10.6601	-4.99532	8.7385e-07	6.67098e-06	5.0751	DOWN	9.10852	11.8447	10.2738	11.9363	10.2784	10.8704	13.2017	7.21917	10.9901	7.87652	10.9993	10.3376	10.7398	11.7065	13.4676	8.92481	10.8978	8.07146	8.61471	8.20457	8.45533	10.0593	10.1948	11.858	8.77479	10.7091	7.83289	7.91289	10.1599	11.8053	11.2312	10.4828	9.76818	11.4257	9.80252	12.9026	10.3038	8.21432	10.4574	10.8033	12.3985	10.4094
ATR	1.06251	10.9904	9.25672	1.22402e-18	1.01134e-16	31.6359	UP	10.2479	9.63662	10.6804	11.3998	13.4573	12.748	12.2729	8.98014	11.8435	10.1774	9.49386	10.6239	12.0681	11.7099	11.1693	11.6595	11.3399	10.2854	11.1222	10.2288	9.28309	10.2119	11.6609	11.7074	10.9016	10.2252	11.1497	9.41574	11.381	11.4429	10.6055	11.4813	8.98299	11.7389	11.5221	10.851	12.3961	10.9823	9.94983	9.57932	11.4944	11.2204
ATRNL1	-1.45116	5.45287	-4.73549	3.02364e-06	2.04841e-05	3.88896	DOWN	3.45943	2	2	7.71425	3.70044	5.32193	6.22882	5.04439	7.04439	3.32193	5.16993	5.39232	4	7.02237	8.38802	5.93074	7.54689	5.20945	4.70044	4	5.20945	5.9542	4	5.08746	4	5.72792	4	5.16993	2.32193	6.30378	3.70044	3.32193	3.80735	5.70044	6.93074	7.25739	5.97728	7.70736	4.58496	8.65821	5.42626	7.04439
AUNIP	1.69603	7.66668	8.44313	5.515e-16	2.82998e-14	25.6503	UP	8.31288	7.41785	6.26679	8.70044	7.54689	9.36413	6.75489	5.45943	8.19476	8.81378	6.88264	7.76155	7.75489	8.18982	6.32193	7.55459	7.49985	8.36632	9.19476	8.73132	7.03342	7.70736	7.58496	9.08746	9.25503	8.56986	7.37504	5.49185	10.062	8.37504	8.36632	8.86728	7.87036	8.31741	8.42206	5.72792	8.9629	8.03342	7.70736	5.61471	7.03342	6.44294
AURKA	2.03105	10.8419	9.49303	1.9405e-19	1.78967e-17	33.442	UP	10.7004	11.6312	10.4757	11.4625	11.8777	12.5056	9.56224	9.60363	12.3359	11.9922	9.93221	11.6316	10.4512	11.463	8.66888	11.0881	11.0423	11.1935	11.5053	11.9454	10.0593	11.0987	11.2656	11.908	11.736	13.1488	11.4163	8.55075	12.3276	11.8482	11.3191	11.5627	11.2155	11.6448	11.9307	8.27612	12.4643	10.9091	11.0498	8.2384	10.7168	10.3083
AURKB	2.24136	9.93307	9.53211	1.42711e-19	1.35274e-17	33.7435	UP	10.8642	10.6555	9.95274	11.0908	10.6294	11.6948	8.66534	7.2854	10.7574	11.363	10.3772	10.8114	10.1046	9.64205	8.19476	10.218	9.22641	11.5868	11.2027	11.0286	8.77808	10.7574	10.2923	11.1396	11.6528	12.1212	10.9979	8.18982	11.2685	10.6493	10.3923	11.5873	11.1997	9.75154	10.0875	7.59246	10.8471	10.2691	9.97441	7.91886	9.56986	10.3815
AVPR1B	-1.10606	1.41865	-4.53819	7.48183e-06	4.25587e-05	3.02621	DOWN	1	4.85798	0	1	4	0	2	0	0	2.32193	0	0	3.45943	1	2	0	4.08746	0	3.80735	0	0	1.58496	0	4.80735	1	2.32193	0	0	0	0	1.58496	0	0	1.58496	0	4.58496	3.32193	4.32193	0	2	2.58496	1
AVPR2	-1.02842	5.25422	-4.15457	3.97485e-05	0.000194351	1.44409	DOWN	3.58496	6.06609	3.32193	7.75489	6.65821	6.89482	7.49985	4.24793	6.02237	4	7.35755	3.90689	3.45943	5.70044	7.5157	3	6.12928	2.58496	4	5.04439	4	5.49185	3.32193	6.53916	3.90689	8.01123	4	2.80735	4.52356	5.78136	6.30378	4	4.64386	4.80735	5.70044	7.19967	4.16993	6.33985	6.67243	4.45943	5.61471	5.04439
B3GALT4	-1.13932	9.14656	-7.79767	5.35266e-14	1.77679e-12	21.1772	DOWN	7.67243	9.9263	8.03892	8.61471	8.90087	9.77479	9.74315	7.2854	9.71081	8.32193	9.56796	8.10852	9.45943	10.1215	9.64746	6.12928	9.32643	8.67948	7.12928	7.44294	9.42417	9.12928	8.44294	9.71768	8.94544	9.12153	9.18488	8.57365	8.10329	9.85019	10.4898	9.45327	8.69349	9.43045	9.01681	9.37504	9.37938	7.04439	9.62753	8.12928	9.03342	9.40727
B3GAT1	-1.56463	6.00126	-5.0534	6.57237e-07	5.17718e-06	5.3479	DOWN	5.72792	4.52356	5.67243	5.93074	7.53138	5.55459	7.30378	5.2854	5.08746	2.58496	6.33985	3.80735	4.9542	9.01959	6.2854	2.80735	7.74819	2.32193	5.93074	4.24793	3.80735	5.20945	5.85798	9.00282	4.58496	4.52356	3.58496	6.02237	6.89482	7.2384	5.08746	7.32193	4	9.58308	4.52356	6.80735	7.78136	5.9542	4.08746	5.9542	8.25267	6.64386
B3GNT4	1.12761	5.96731	5.26483	2.278e-07	1.98657e-06	6.36432	UP	5.70044	4.80735	6.10852	7.57743	5.75489	6.74147	6.18982	5.12928	5.64386	6.93074	5.42626	6.52356	7.8392	6.20945	6.02237	4.70044	6.26679	6.26679	6.98868	8.06609	4.70044	7.21917	6.88264	7.91886	9.06609	6.76818	5.45943	4.90689	5.45943	8.57365	7.54689	6.35755	5.78136	5.58496	5.64386	5.45943	7.46761	7.93074	5.67243	4.32193	6.14975	5.97728
B3GNT6	-3.36816	6.33331	-5.66427	2.79748e-08	2.9748e-07	8.38292	DOWN	10.0526	5.52356	3.45943	4.75489	4.16993	5.85798	9.82814	5.35755	3.90689	4.64386	1	1.58496	4.24793	10.3805	5.2854	10.4115	8.70736	7.92481	3.32193	2	7.75489	8.16491	9.92778	3.16993	3.70044	5.72792	6.6865	7.32193	1.58496	5.04439	6.02237	1.58496	3.90689	2.80735	5.67243	3.70044	11.4294	6.59991	7.15987	3	13.1874	8.18488
B3GNT8	-1.1284	8.68386	-4.33326	1.85376e-05	9.75146e-05	2.16521	DOWN	8.26209	10.8619	7.2384	10.421	8.49985	10.0375	7.62936	7.55459	9.79116	7.53916	11.0795	8.40939	6.61471	10.9723	8.73809	9.77149	7.27612	10.3597	9.85019	9.30606	8.57743	7.66534	8.49985	11.2621	11.1026	9.61655	9.01959	8.91886	6.26679	10.6055	10.0182	11.1787	8.30378	6.14975	8.90388	8.53916	8.13443	10.2131	8.71425	8.71768	8.07682	8.2384
B3GNTL1	1.04279	8.2277	8.05251	9.06041e-15	3.5254e-13	22.9127	UP	7.64386	7.25739	7.26679	8.2384	9.61287	9.34651	9.51767	6.39232	9.13955	8.90388	7.9542	9.11894	9.2503	8.53528	8.03892	8.76487	8.55842	7.12928	8.18488	8.224	7.88264	8.35755	8.77808	7.62936	8.633	7.65105	8.17991	7.21917	8.11374	7.18982	9.51373	9.03342	7.92481	8.79116	7.35755	7.63662	9.39446	7.7211	8.01681	6.33985	8.98014	8.29002
B4GALNT2	-2.25239	4.25446	-4.60807	5.44792e-06	3.19589e-05	3.32798	DOWN	2	5.83289	1.58496	6.24793	2	8.37069	6.02237	1	0	1.58496	2.32193	2	2.32193	6.56986	0	10.1447	7.33092	1.58496	4.64386	7.36632	3.45943	5.97728	7.15987	3.45943	7.18982	6.40939	6.06609	3.16993	3.70044	6.50779	6.90689	3.45943	1.58496	4.90689	3	1	2.58496	8.05528	1	4.90689	8.15987	0
BAALC	-1.83258	5.30925	-7.37574	9.26038e-13	2.41222e-11	18.3954	DOWN	3.32193	11.0458	4.52356	5.35755	3.16993	6.32193	7.70044	4.08746	5.16993	3.45943	7.14975	5.08746	4.75489	6.04439	7.47573	3.90689	5.24793	2	3.16993	3.32193	4.90689	5.20945	4.39232	6.30378	3.16993	5.70044	4.08746	5.49185	5.70044	6.12928	5.75489	4.08746	5.04439	6.83289	4.64386	6.10852	4.80735	4.52356	5.49185	5.16993	6.70044	5.35755
BAAT	3.7931	5.55935	7.6012	2.04756e-13	6.11831e-12	19.8674	UP	1.58496	3.16993	11.1092	6.84549	4.32193	9.95128	8.84862	4.32193	5.49185	2.80735	1.58496	4	2.32193	5.2854	9.55075	4.24793	9.54689	6.75489	6.06609	7.39232	4.9542	5.72792	5.08746	6.16993	6.08746	4.16993	3	5.08746	2.80735	1	4.32193	3.32193	6.12928	3.16993	3.90689	2.32193	4.45943	7.67243	8.92778	5	2.58496	4.80735
BAIAP2L1	1.1197	12.544	5.79977	1.33578e-08	1.51386e-07	9.09628	UP	12.5515	11.1561	12.1309	11.9451	12.8935	12.0206	12.7097	11.2662	12.8202	13.4987	10.6839	13.7614	13.2158	13.3489	11.0715	13.0856	12.9039	12.5223	12.7709	12.5226	12.8263	12.978	15.1161	12.8425	13.0808	12.6607	13.8569	11.4315	12.6048	13.442	13.5631	13.2879	11.7147	12.9753	14.3518	10.2119	13.9933	10.6221	12.4553	10.5527	12.0627	13.2266
BAIAP2L2	1.46214	11.4031	5.68806	2.45944e-08	2.63918e-07	8.50714	UP	11.9851	11.1536	10.7228	11.6147	12.6786	13.4071	12.0251	10.983	12.1849	12.535	11.2837	11.6952	9.00843	12.5297	9.0607	11.2796	12.6328	11.8754	11.6156	11.1861	11.6506	10.7457	13.6965	9.76155	13.1152	11.1254	12.0393	9.18735	11.6861	11.3471	11.584	12.4732	12.2351	13.4341	12.9516	9.95855	12.8815	11.4903	12.0406	8.93664	10.809	11.9936
BAMBI	1.85879	9.1742	5.34434	1.51542e-07	1.37423e-06	6.75598	UP	10.9564	9.84862	5.90689	11.0782	15.6991	11.464	7.55459	9.33092	8.58871	9.91139	8.23362	6.06609	10.2324	7.93664	9.01402	7.01123	6.91886	8.21917	10.9226	9.85331	6.40939	10.7805	11.7603	10.4502	8.53138	9.33762	10.9076	8.98584	6.40939	7.91886	10.944	6.2854	8.29462	11.4823	9.75822	7.40088	7.07682	10.0293	8.82972	8.31741	9.9901	9.56415
BANCR	1.34818	2.21582	3.4361	0.000650943	0.00238667	-1.17055	UP	7.14975	0	5.39232	3.32193	2	4.64386	0	2	0	0	1.58496	2.32193	1	2	2.58496	1.58496	3.58496	0	1	0	4	3.80735	3.90689	0	0	5.93074	4.24793	0	5.08746	1	2	1	0	2	1.58496	3.45943	2.58496	4.45943	2	2.58496	0	4.32193
BARX1	-1.53329	9.6571	-3.65155	0.000294712	0.00118162	-0.435017	DOWN	9.39874	10.5661	9.21432	10.8588	9.26209	9.11894	9.09276	11.2533	10.4778	8.24793	9.7039	12.4223	8.79442	10.5971	14.4253	6.98868	9.04439	7.49985	8.16993	7.3837	7.93074	10.4136	8.55842	8.07682	7.75489	10.8025	7.8392	7.97728	8.64024	12.3805	10.0808	8.10329	11.4136	11.1053	8.66534	14.4422	7.96	6.33985	11.7561	12.5913	12.0067	8.74819
BARX1-DT	-1.76989	3.94367	-4.63866	4.73548e-06	2.82309e-05	3.46141	DOWN	2.58496	3.58496	3.58496	5.35755	5	3	3.32193	6.39232	4.75489	2.58496	2	6.39232	2.58496	4.45943	9.01959	1	3.90689	1.58496	2.80735	2	3.80735	4.32193	2.58496	5.32193	2.80735	4.39232	0	3.16993	3	6.04439	4.16993	3.70044	4.24793	6.32193	2.80735	8.83289	2.32193	3.58496	5.24793	6.76818	7.62936	3.16993
BATF	1.00752	8.65451	4.41605	1.29027e-05	7.02221e-05	2.50868	UP	10.5934	7.56986	9.73132	8.45121	7.70736	9.91737	9.54496	7.02237	9.77479	7.62936	8.6865	6.91886	7.74819	9.36851	7.75489	8.47168	9.37069	10.2621	8.07146	5.88264	7.6865	7.11894	9.84549	5.64386	8.64024	8.75154	9.75822	6.10852	9.66534	7.71425	10.3219	10.1434	11.2662	8.23362	8.48784	7.85798	8.48784	8.26679	10.1923	7.16993	8.10329	10.0403
BATF2	1.28122	9.8544	5.07967	5.77286e-07	4.5962e-06	5.47218	UP	11.3842	9.65105	11.7566	10.8424	8.92184	9.49785	9.44294	7.19967	12.0095	10.3848	8.54689	11.0761	9.57554	11.258	8.69349	10.6156	9.52552	10.6653	8.98014	9.39874	8.77808	10.1033	11.2052	9.8857	11.3729	9.46557	9.14466	6.97728	12.2615	11.411	9.2738	12.3211	8.43045	7.85175	7.83289	8.84235	10.7322	9.59619	9.49185	7.82655	7.81378	10.6786
BBC3	1.17714	9.82602	6.6338	1.04595e-10	1.83035e-09	13.7945	UP	11.5319	9.49985	10.8471	10.4115	9.45121	10.3163	10.6018	8.2384	10.2515	9.21432	10.3869	10.6165	11.2726	11.0715	9.41151	9.38154	9.75322	9.82972	10.988	10.374	8.77808	9.81698	10.8517	8.80413	10.7616	10.2969	9.61471	7.16993	11.769	10.8704	10.7194	11.0941	9.27146	10.6733	8.3966	9.58496	10.4346	9.4818	10.421	8.76155	9.28771	10.3163
BBOX1-AS1	1.89562	6.83409	5.36449	1.36564e-07	1.25036e-06	6.85604	UP	7.5157	7.42626	2	7.10852	6.97728	9.86109	9.01123	6.44294	9.54882	7.09803	6.78136	8.17493	8.25739	7.74819	5.80735	8.24793	6.14975	8.82337	3	6.53916	7.62205	8.3443	9.50383	8.05528	7.81378	7.41785	9.42626	6.78136	9.0634	5.70044	9.43045	7.42626	8.50383	6.83289	9.48985	6.02237	6.82018	7.66534	8	5.42626	5.9542	8.01123
BCAR4	1.13629	1.55449	2.99215	0.00293907	0.00905741	-2.55253	UP	0	0	0	4	0	6.35755	2.80735	2	0	0	0	2	1	1	2	3.70044	5.64386	1.58496	3.90689	1	1.58496	4.9542	1	2.58496	0	2	0	0	0	0	2.32193	0	1	0	2.58496	3.70044	1.58496	5.88264	1	2.32193	0	0
BCAT1	1.03508	10.0303	4.43642	1.17917e-05	6.45358e-05	2.59411	UP	8.72451	11.5803	9.39874	12.0046	8.64746	10.9054	10.1472	7.50779	11.1183	6.9542	8.84235	10.4737	10.9121	10.2738	12.8784	8.81057	9.32418	7.55459	9.91289	8.53916	7.53916	10.4305	9.47371	8.70044	9.03342	9.95128	6.84549	7.73471	17.57	10.8872	9.99577	10.9054	9.11374	11.8568	8.87958	9.00562	9.29002	8.63662	9.99294	7.65821	13.4051	9.49785
BCHE	-2.98291	5.83584	-7.39916	7.92932e-13	2.11391e-11	18.5467	DOWN	4.32193	8.224	4.52356	7.34873	4.32193	6.37504	9.44708	3.45943	7.80735	3.70044	6.32193	6.49185	9.67419	6.6865	11.9001	3.16993	5.08746	5.12928	3.16993	2	5.58496	5.45943	4.52356	6.75489	3.32193	1.58496	3.58496	6.16993	3.90689	7.67948	7.10852	3.70044	6.64386	6.70044	4.45943	8.2854	4.08746	3.58496	7.24793	8.90689	7.3837	1
BCL11A	-1.1304	9.41234	-3.47631	0.000563148	0.00209814	-1.03647	DOWN	7.7879	8.90388	6.85798	10.4939	10.9248	11.6812	12.0624	5.85798	11.3399	10.2095	11.4737	10.7082	9.94691	10.3509	10.8842	10.0042	10.1189	8.87036	10.9679	5.49185	6.85798	11.5078	10.5469	11.617	10.2969	7.82655	9.95274	9.34207	6.72792	10.1228	8.61839	10.7013	11.314	8.44294	9.31741	11.3576	7.98868	10.0279	8.33092	11.0668	7.52356	9.35535
BCL2	-1.20183	9.48098	-6.27201	9.12441e-10	1.31432e-08	11.6927	DOWN	8.37938	8.9542	8.96867	9.9901	7.32193	8.79116	12.716	6.18982	9.52943	8.26679	10.6627	9.91588	9.633	11.856	10.7364	9.10852	10.5088	6.82018	8.633	10.5245	7.8392	8.81698	8.36194	10.1124	9.80735	8.19476	7.85798	7.45943	11.2644	10.1911	9.3966	10.8194	8.34873	9.57554	8.47978	11.2929	9.82337	7.74819	8.82972	9.783	9.47371	9.7211
BCL2A1	1.27078	8.28649	4.89778	1.40145e-06	1.02045e-05	4.62323	UP	9.57932	9.82496	8.56605	9.54303	5.9542	8.55842	10.1189	5.45943	7.69349	6.26679	9.89178	8.29921	8.16993	8.59619	8.29002	7.06609	9.05799	6.20945	6.59991	6.40939	6.62936	8.86109	6.71425	5.85798	8.53138	8.58496	7.17991	6.08746	11.9451	7.82018	7.67948	9.13186	8.17493	10.4336	7.39232	8.04439	8.36194	7.24793	9.47168	7.34873	11.5236	10.9211
BCL2L2-PABPN1	1.05851	4.31743	4.57722	6.27002e-06	3.63072e-05	3.19425	UP	3.70044	1	3	3.70044	5.16993	3	5	3.80735	5.24793	4.64386	2.32193	4	5.49185	5.20945	4.16993	4	4	5	6.83289	5.93074	4.08746	4.16993	6.2854	4.9542	5.32193	4.52356	4.45943	3.70044	6.24793	5.12928	5.58496	5.04439	3.90689	5.08746	4.24793	3.90689	5.88264	4.45943	4.24793	2	5.49185	4.39232
BDH2	-1.10746	9.74624	-7.78303	5.92022e-14	1.93829e-12	21.0788	DOWN	10.2656	8.59246	8.81698	10.2515	8.83289	10.6653	10.1228	8.81698	10.7616	10.3966	10.0661	9.12412	10.633	10.5216	10.7313	10.2107	8.8392	9.5157	8.89178	9.3837	9.20212	9.82018	8.51175	9.19229	10.1799	9.37721	9.90388	8.97441	9.92926	9.16993	10.9607	10.2981	9.33316	9.9542	10.1111	10.2703	10.8345	9.55842	8.92481	8.75489	9.89482	10.0728
BDKRB1	-1.437	6.70176	-6.38727	4.62306e-10	7.11259e-09	12.3519	DOWN	4.85798	7.66534	5.55459	7.17991	4.32193	7.83289	4.58496	5.9542	6.6865	4.58496	8.38802	6.65821	6.61471	7.67948	10.1699	6.30378	6.6865	4.52356	6.55459	7	4.90689	5.58496	8.21432	5.2854	6.50779	5.70044	6.76818	6.30378	5.32193	9.15482	4.52356	6.56986	7.72792	8.68299	6.47573	7.97728	5.32193	6.40939	6.80735	5.42626	8.33092	7.6865
BEND5	-2.24245	5.79627	-7.74997	7.43012e-14	2.38295e-12	20.857	DOWN	4	6.71425	4	7.10852	5.04439	6.91886	8.93958	4.52356	5.75489	2.32193	8.30834	6.40939	4.75489	6.71425	8.85798	2	6.59991	5.08746	4.45943	1.58496	5.88264	6.53916	4.58496	6.45943	3.45943	5.72792	3	4.9542	4.75489	6.64386	6.70044	5.12928	5.80735	6.39232	5	9.11114	4.70044	5.64386	6.49185	7.41785	5.12928	5.88264
BEST3	1.5803	3.03674	4.28578	2.27614e-05	0.000117186	1.9709	UP	0	2	2.58496	5.70044	4.9542	3	5.08746	6.02237	5.08746	0	1	3.32193	2.80735	2	1.58496	5.35755	6.89482	2	4.90689	2.80735	2.80735	7.29462	4	6.75489	4.24793	1	1.58496	1	1.58496	2.58496	3.90689	4	0	1.58496	3.45943	3.16993	1	7.97154	1.58496	5.08746	3	2.32193
BEST4	-1.00742	5.05874	-3.7079	0.000237981	0.000975053	-0.235708	DOWN	3.90689	3.70044	2.32193	7.05528	5.75489	6.82018	5.88264	5.24793	2.32193	4.24793	3.70044	3.90689	5.61471	3.58496	4.64386	6.02237	5.88264	5.42626	6.58496	2.80735	6.6865	5.67243	4.64386	7.32193	3.70044	6.87036	2.32193	3.90689	3.16993	2.32193	5.35755	5.9542	5.35755	5.39232	4.80735	4.58496	5	7.36632	4.90689	3.58496	4.58496	5.58496
BEX1	-2.41709	4.50103	-4.32864	1.89126e-05	9.93036e-05	2.14625	DOWN	4	12.7511	3.80735	4.70044	0	9.13955	3.32193	4.58496	10.611	1	3.16993	6.50779	2.32193	5.75489	9.10591	7.2854	4.90689	1	0	0	1	9.02237	2.80735	1	1.58496	4.24793	2.58496	4.90689	1.58496	8.46761	3.80735	0	3.90689	5.08746	4.80735	7.72792	4.70044	11.3304	8.49185	6.44294	2.80735	2
BEX2	-2.36574	5.85238	-5.16553	3.76345e-07	3.12087e-06	5.88241	DOWN	4.80735	7.35755	4.45943	4.16993	0	8.32193	8.24793	7.74819	6.50779	2	7.46761	5	3	6.58496	7.45943	2.58496	6.89482	8.41785	2.32193	1	8.33092	5.93074	2	3	2.58496	2.80735	2.32193	5.64386	3.45943	8.98584	3.90689	4.08746	5.08746	10.3729	4.45943	7.55459	5.32193	8.27146	7.67243	6.58496	5.04439	7.56986
BEX3	-1.02717	10.5066	-4.30054	2.13582e-05	0.000110781	2.03112	DOWN	9.09276	12.1734	8.65464	9.80735	12.1075	12.0725	10.6008	9.83447	11.2527	7.33985	10.6073	10.2796	8.9571	9.86573	12.36	7.82018	9.5157	12.2796	12.1193	8.35315	11.3498	11.4294	10.7117	8.5812	8.62205	8.84862	8.55075	9.29232	8.37504	12.3276	10.4707	8.59246	10.0224	11.4414	8.97728	12.2568	8.81378	10.7797	11.4179	10.3298	11.4419	8.92481
BEX4	-1.71067	9.11615	-7.62548	1.73702e-13	5.2455e-12	20.028	DOWN	8.40939	8.72792	8.27146	8.64746	5.39232	11.233	10.3641	9.33985	8.75822	6.14975	9.63481	9.57554	7.63662	9.33316	11.9103	7	9.09011	8.73809	6.97728	6.61471	7.94837	9.0954	8.07146	8.04985	7.52356	7.67948	7.04439	8.32643	7.56224	9.98299	9.46148	8.54303	9.01123	10.4136	7.81378	11.8106	8.21432	10.1059	9.51964	10.3652	9.10852	8.91588
BEX5	-1.44526	6.29219	-3.87044	0.000126525	0.000553814	0.355072	DOWN	4.16993	8.30834	3.45943	4.9542	7.01123	7.12928	6.53916	5.64386	3.16993	2.32193	5.64386	4.90689	7.79442	5.70044	7.98868	2.80735	6.16993	5.58496	8.71425	8.15482	7.54689	7.33985	3.90689	11.1163	10.8734	3.90689	1	5.55459	8.73132	4.16993	9.47168	4.39232	7.09803	9.3837	8.28077	8.27146	4.75489	6.96578	5.70044	5.35755	6.24793	7.02237
BGN	2.39197	14.4067	10.0723	1.88683e-21	2.53488e-19	37.9888	UP	14.0172	16.5007	14.5874	15.8312	13.8721	14.5737	16.5416	12.0098	15.2675	11.4481	14.7008	14.8162	15.8565	14.868	16.0134	11.9954	14.7949	11.8723	14.7198	13.0028	12.2366	14.1185	15.7564	15.0594	13.766	11.5206	12.7879	12.5668	14.2142	17.0673	17.1715	15.3008	15.8819	15.4269	12.9753	15.0595	11.9043	10.6375	15.8927	14.1897	17.493	12.7507
BHMT	-1.87155	3.74191	-5.09855	5.25715e-07	4.22879e-06	5.56187	DOWN	0	10.1923	0	7.21917	7.88264	2.80735	2.80735	6.6865	2	4.32193	2	3	2.80735	7.35755	3.58496	3	5.80735	5.35755	4.16993	1.58496	5.42626	5.42626	2.58496	5.58496	4.75489	6.45943	3.32193	4.9542	0	2	7.40088	1	2	3.16993	3.45943	4.80735	6.02237	5.49185	3.16993	4.70044	5.24793	3.32193
BHMT2	-2.05706	6.53836	-7.32742	1.27423e-12	3.24491e-11	18.0842	DOWN	4.64386	7.09803	5.39232	6.89482	1.58496	7.02237	7.05528	3.80735	7.24793	4.16993	7.63662	8.42626	5.35755	7.43463	10.1923	4.58496	6.35755	4.32193	5.20945	4.64386	4.80735	7.06609	5.72792	6.32193	4.52356	7.56986	3.80735	4.24793	3.32193	7.76155	6.87036	3.80735	6.85798	8.54689	6.61471	10.341	5.20945	5.52356	7.02237	8.51964	8.78463	6.58496
BID	1.05628	11.0185	8.96932	1.10491e-17	7.72624e-16	29.4794	UP	11.5878	10.9248	10.4788	11.5435	12.1248	12.4014	10.9715	8.69349	10.9099	11.444	10.6812	11.3509	11.2715	11.9263	10.5108	11.0808	11.8333	10.9454	11.9965	11.9114	10.2703	10.683	10.6582	10.2444	11.6826	10.4105	10.4868	9.03617	12.2805	11.0334	12.1734	11.6502	11.4543	11.4727	11.3515	9.79928	11.5579	11.0471	11.9622	9.27845	10.8781	10.7912
BIK	1.43207	9.54333	5.81314	1.24087e-08	1.41807e-07	9.16745	UP	10.5632	8.47168	9.09276	8.70736	10.3869	10.9901	9.31515	8.00562	10.5887	10.2854	9.22641	10.0293	8.10852	11.1427	7.08746	8.16993	11.014	8.09276	10.7549	9.35315	10.2456	9.56033	8.84549	9.31515	11.6684	9.87805	11.0307	8.55459	10.363	8.13443	10.3576	10.1712	10.7474	9.62022	10.9665	8.32193	10.683	9.56796	10.599	6.85798	7.24793	9.18239
BIRC5	2.13313	10.6181	9.26195	1.17549e-18	9.78353e-17	31.6756	UP	11.1235	11.5618	10.2396	11.1529	11.8918	12.3166	9.08481	8.72451	11.5206	11.8005	10.3912	11	11.4089	12.0492	9.13443	10.6119	10.7125	11.5382	11.8963	12.3024	9.65642	10.8186	10.8416	11.3723	11.9701	11.6202	10.7074	8.99435	12.6589	11.8952	10.5343	12.058	11.2703	10.9061	11.7536	7.71425	11.8952	10.5803	10.3674	7.63662	9.97298	10.6138
BIRC7	2.77522	4.54584	7.51763	3.59602e-13	1.02315e-11	19.3179	UP	7.21917	3	5.32193	5.04439	2	6.76818	4.90689	3	3.32193	0	6.2854	2	2.80735	4.08746	2.32193	4.32193	4.39232	1	6.61471	2	5.12928	7.78136	7.40088	10.3674	2.80735	3.58496	3.32193	3	4.32193	6.45943	8.66888	7.07682	10.0279	4.45943	2.80735	1.58496	4.45943	5.49185	4.24793	3.16993	3	5.90689
BLM	2.04915	9.42665	11.2232	1.20279e-25	3.8359e-23	47.48	UP	9.11634	9.79116	8.64386	10.6751	10.9701	11.4949	10.2131	7.08746	10.3815	9.23601	8.55075	9.04439	9.39874	10.6357	7.83289	9.5157	9.37287	9.2854	10.875	10.3476	7.98299	9.33316	9.93221	11.7465	10.3934	10.585	9.2738	7.26679	10.585	9.67419	9.2854	10.813	9.79116	10.352	10.1137	7.46761	10.5401	10.0539	8.89482	7.49985	9.58308	10.1357
BMERB1	-1.30177	9.559	-6.25443	1.01125e-09	1.44357e-08	11.5931	DOWN	7.58496	9.56796	7.82655	9.67596	8.02791	9.06878	10.2228	8.73809	9.83131	8.82972	9.85487	9.76155	9.33092	10.1699	12.4486	10.0224	8.97154	7.70736	8.20945	7.33985	8.08746	9.74147	8.81698	8.2854	8.8857	7.13955	7.33985	7.96578	10.543	10.5078	10.6996	9.13955	9.3966	10.6211	9.15735	12.169	9.26679	7.97154	9.87652	9.90087	10.4919	8.43879
BMP1	1.2015	11.4195	9.22534	1.55966e-18	1.25523e-16	31.3983	UP	11.5033	12.9537	10.242	12.7266	12.0258	12.4091	11.4671	9.46352	13.1357	11.3696	10.9016	11.526	12.3869	11.736	13.2639	10.8368	10.697	10.3163	11.4252	12.0461	10.0728	11.0154	12.6287	10.8696	10.7632	10.9189	10.332	9.84235	12.6872	12.5413	12.6096	12.0203	11.3449	12.0241	11.3912	10.9986	12.2986	10.5098	11.7423	9.58496	14.0009	10.7237
BMP3	-2.64228	5.56318	-4.77442	2.51919e-06	1.73736e-05	4.06309	DOWN	4.52356	3	3.45943	9.42417	1	4.85798	8.49985	4.75489	8.69697	4.08746	4.16993	8	2.80735	5.12928	12.4556	4.85798	5.88264	6.91886	4.80735	2.32193	6.84549	6.9542	1.58496	9.26679	3.45943	7.40939	2	5.61471	0	6.93074	4.75489	4.08746	4.32193	4.45943	5	10.0375	3.16993	6.98868	7.2384	10.774	6.87036	2.58496
BMP5	-2.51373	4.70981	-6.32531	6.67079e-10	9.90575e-09	11.9963	DOWN	5.49185	1.58496	0	6.74147	1.58496	8.04985	5.80735	4.75489	3.32193	3	4.64386	2.58496	2.80735	7.7211	6.02237	7.12928	5.93074	7.46761	3.58496	5.08746	4.24793	4.80735	2.32193	4.70044	3.90689	3	6.55459	4.52356	0	4.75489	4.45943	1.58496	3.80735	4.32193	5.61471	5.2854	7.27612	6.42626	2.80735	4.58496	4.58496	3.80735
BMP6	-1.47086	7.2496	-6.25587	1.00278e-09	1.43295e-08	11.6012	DOWN	4.75489	7.39232	6.33985	8.75822	4.90689	7.62936	7.70736	5.35755	6.78136	5.35755	7.88264	4.75489	7.13955	8.71425	9.22882	4.75489	8.13955	6.33985	4.80735	4.85798	6.59991	5.78136	5.55459	6.06609	6.98868	7.14975	4.32193	5.88264	6.37504	7.17991	8.24317	6.75489	6.30378	9.61655	7.2854	8.52748	8.25739	5.16993	6.97728	5	9.53528	8.13443
BMP8A	2.009	7.39656	9.22635	1.54761e-18	1.24848e-16	31.4059	UP	7.90087	9.26209	9.07146	10.5469	6.90689	8.47978	9.41574	5.61471	9.02237	6.08746	4.08746	6.83289	8.47978	8.26679	5.83289	6	8.14466	5.67243	6.26679	6.56986	5.61471	6.59991	9.05257	10.2288	7.52356	6.58496	5.88264	6.02237	9.10066	10.0967	8.37069	8.32643	6.22882	8.48382	6.6865	6	7.52356	5.85798	6.70044	6.42626	10.1724	7.08746
BMPER	-2.35516	5.91136	-7.51755	3.59801e-13	1.02315e-11	19.3174	DOWN	1.58496	5.85798	3.70044	6.6865	5.80735	6.6865	5.70044	3.32193	6.79442	3.90689	5.93074	8.62936	5.12928	7.54689	9.7039	5.70044	6.9542	0	7.90689	2.80735	4.52356	7.15987	4.32193	6.67243	4.08746	5.85798	2.80735	4.58496	5.08746	7.62936	5.35755	3.80735	6.39232	7.82655	5.9542	10.2877	4.32193	7.56986	6.10852	6.82018	8.16993	5.49185
BMPR1B	-1.05682	6.78595	-2.84008	0.00473684	0.0137695	-2.98396	DOWN	3	10.7814	6.67243	7.49985	7.63662	8.40514	6.35755	4	7.39232	3.70044	3.58496	7.77479	8.92184	6.98868	8.91588	5.16993	7.37504	7.20945	5.75489	5.70044	8.8009	9.57743	2.80735	8.93958	1.58496	5.58496	5.61471	7.41785	3.80735	8.84862	7.29462	5.49185	6.79442	9.54303	4.32193	10.2923	4.64386	7.16993	5.78136	8.36194	9.9571	5.12928
BMS1P17	1.13701	1.3539	4.53342	7.64452e-06	4.34046e-05	3.00576	UP	0	0	3	5.55459	3.32193	4.16993	3.80735	3.16993	0	0	0	4.39232	1.58496	1	1.58496	0	3.45943	1.58496	2.80735	1	3	2.32193	1	4.45943	1.58496	1	1	0	0	1.58496	3.70044	3.70044	1	1.58496	2	0	1	4.08746	1.58496	1	3.58496	2.32193
BMS1P22	1.79757	2.01658	5.75596	1.69894e-08	1.88046e-07	8.86411	UP	1	1	1	6.32193	5.55459	6.12928	4.24793	2.32193	3.16993	0	0	5.49185	2.80735	1	1.58496	0	4.39232	2.32193	2.58496	1.58496	2.80735	0	0	4	0	4.08746	2.58496	2	0	2	3.16993	4.75489	2	4	4.52356	1	1	4.80735	1	2.80735	5.45943	1
BMX	-1.39318	5.83406	-5.29227	1.98014e-07	1.75098e-06	6.49893	DOWN	4.24793	5.67243	3.90689	5.52356	3.16993	7.12928	7.04439	3	7.12928	4.39232	6.85798	5.2854	5.08746	6.83289	8.21917	5.83289	6.59991	4.80735	4.45943	3	6.10852	4.52356	5.16993	4.75489	4.58496	6	4.08746	5.67243	5.45943	6.93074	7.32193	4.45943	5.61471	7.40088	6.30378	7.74819	5.64386	5.24793	5.90689	4.80735	7.35755	5.90689
BNC1	-1.38999	3.36565	-3.34979	0.000884277	0.00313312	-1.45341	DOWN	3	0	2	4.39232	1	2	6.16993	7.82655	2.32193	1	2	7.12928	3.70044	4.58496	9.8009	2.32193	5.97728	1	2.58496	1.58496	3	4.45943	1.58496	1	1.58496	3.58496	6.50779	8.75154	1.58496	3.70044	4.64386	3.90689	3.16993	4.32193	2.80735	1	2.58496	5.08746	4.45943	3.70044	7.62205	4.24793
BNC2-AS1	-1.6392	2.60297	-6.27268	9.08877e-10	1.30974e-08	11.6965	DOWN	1.58496	3.90689	1.58496	2.80735	2	3.45943	3	0	3.90689	1	2.32193	3.32193	3.80735	2.80735	6.74147	1	4.58496	0	2.58496	0	2	3.32193	2.32193	2.32193	1.58496	0	1	0	0	3.32193	4.90689	2.58496	2	3	2	5.52356	2	4.39232	3.45943	4.16993	4.08746	2.58496
BNIP3	-1.29428	9.66611	-5.68657	2.47947e-08	2.65817e-07	8.49932	DOWN	8.71081	11.2027	7.30378	11.463	7.67948	8.76818	10.5641	9.01123	9.41151	6.75489	8.83605	9.42626	8.44708	9.65642	11.4959	7.40088	8.76487	6.89482	11.8431	7.09803	8.08215	8.29921	8.75154	8.10852	8.02791	9.88722	11.8234	8.25267	10.0553	11.0492	8.71081	8.34873	8.03892	12.0161	8.78136	10.7632	9.13186	10.7515	10.5157	9.16239	10.9226	8.56224
BNIP3P1	-1.30087	3.11067	-5.09214	5.42699e-07	4.3472e-06	5.5314	DOWN	3.45943	5.20945	1	4	1	1	3.58496	3.16993	2.32193	1	3.32193	4.24793	2.32193	2.58496	5.16993	1.58496	4.24793	1	5.35755	0	2	3.32193	2.32193	1	2	3.45943	5.55459	2.58496	2.58496	4.85798	2.80735	0	3.16993	4.85798	3	4.39232	2	4.58496	4.52356	4.24793	4.64386	1
BNIP3P11	1.94616	4.51659	9.25453	1.24487e-18	1.02362e-16	31.6193	UP	2.32193	3.90689	4.32193	4.58496	6.08746	7.10852	6.65821	3.90689	6.47573	3.16993	2.58496	6.76818	4.52356	4.16993	3.58496	5.12928	5.61471	4.64386	2.32193	3.80735	1.58496	5.12928	4.52356	6.14975	3	5.39232	4.16993	3.70044	5.2854	5.16993	5.61471	4.32193	2.80735	4	4.90689	4.85798	5.93074	5.49185	4	3.45943	5	4.90689
BNIP3P17	1.11525	3.69616	3.21502	0.0014085	0.00473488	-1.88142	UP	5.35755	1.58496	1	5.20945	5.80735	6.40939	4.58496	3.16993	2.80735	4.16993	3.58496	5.20945	4	3.80735	3.58496	2	4.45943	1	2.58496	4	1.58496	3.45943	3	7.22882	5.97728	3.70044	6.26679	2.32193	7.82018	2.80735	4.16993	5.39232	4.90689	2.58496	4.70044	3.58496	6.14975	3.32193	1	3.32193	5.35755	5.45943
BNIP3P42	1.29547	2.22324	5.81875	1.20301e-08	1.37896e-07	9.19738	UP	0	1	2.32193	3.70044	3.80735	5.35755	5.20945	0	4.16993	1.58496	1.58496	2.58496	3.58496	2.58496	4.39232	3.58496	4.75489	0	2.58496	1.58496	2	4.85798	2	4.24793	1	3	1.58496	1.58496	2.32193	2	3.80735	1.58496	0	2.32193	3.45943	3.70044	2.32193	5.20945	0	1.58496	3.70044	2.80735
BNIP5	2.56741	9.73286	6.39432	4.43342e-10	6.84862e-09	12.3926	UP	11.0478	8.29462	9.5157	11.4099	10.1215	11.6909	9.71425	9.5812	12.1176	9.70217	8.81698	10.5078	5.58496	11.8638	7.08746	10.1447	10.7879	9.41785	9.84078	8.79116	7.26679	9.633	12.7645	10.2444	11.8502	11.8506	10.6555	6.37504	7.02237	10.2324	10.9915	11.7586	9.67243	8.52748	9.81538	7.42626	10.1408	10.0593	11.5348	7.25739	8.83605	9.97441
BNIPL	-1.10967	5.11261	-3.74003	0.000210416	0.000872658	-0.120798	DOWN	3	2.32193	2.80735	5.9542	7.70044	6.16993	6.65821	6.02237	5.83289	3.70044	3.16993	5.12928	3.80735	6.83289	5.12928	5.9542	7.2854	4.9542	6.76818	5.49185	4.85798	7.66534	5	6.2854	3.16993	7.39232	6.26679	8.36632	3.80735	3.70044	5.97728	4	4.24793	5.61471	4.80735	4.80735	5.67243	9.44915	3.90689	4.39232	3.80735	5.72792
BOC	-1.48769	9.6429	-4.67993	3.91492e-06	2.37456e-05	3.64268	DOWN	7.77479	10.4325	8.99718	10.5718	6.32193	9.35975	12.4385	6.58496	10.2192	6.65821	11.0133	10.2276	9.80896	10.733	13.7371	6.67243	9.54689	5.52356	7.97154	6.22882	8.06609	10.255	8.15482	9.9542	7	7.33985	6.90689	8.55842	7.80735	11.9465	11.0272	8.64746	9.60177	10.5479	8.81698	13.0049	7.81378	6.84549	10.7168	10.9629	10.8556	8.70044
BOP1	1.10513	11.9547	7.93507	2.06449e-14	7.38456e-13	22.1079	UP	11.7536	11.9894	11.1124	12.2201	12.8295	13.9324	11.4147	10.0993	13.1904	14.0337	12.0505	12.0172	12.6402	12.2848	11.6198	11.5319	12.221	11.7013	12.6564	12.9773	10.9293	11.5177	13.0077	12.8809	13.3678	12.236	12.2938	10.0539	13.4857	12.5932	12.2435	13.4732	12.7202	10.7591	13.3273	11.2033	12.8628	12.645	12.2653	9.44501	11.7202	11.6193
BORA	1.38955	8.92181	8.37245	9.21308e-16	4.51058e-14	25.1482	UP	9.63118	8.55459	8.32193	9.33762	10.3421	11.3044	9.08746	7.21917	10.6671	9.18239	8.19476	9.17243	9.55267	9.99718	7.72792	9.54496	8.46352	9.37069	9.93811	9.59805	8.08746	8.93074	9.45327	12.8277	9.99435	8.72792	9.37938	6.75489	10.2912	9.31741	9.37938	9.84862	9.34873	9.09011	9.56415	7.30378	9.85331	8.90388	7.13955	7.29462	8.14975	9.83289
BPIFA2	1.53711	2.59798	3.36196	0.000847208	0.00301276	-1.41393	UP	2.58496	4.45943	0	3.16993	3.80735	5.85798	2.58496	3.80735	3.45943	2	1.58496	1.58496	0	2	2	1.58496	5.16993	0	2	5.32193	6.72792	3.16993	1.58496	5.20945	2.32193	4.08746	11.3982	2.32193	0	1.58496	3	0	0	8.37504	2.32193	3.32193	2.80735	4.58496	11.8025	2	3	5.16993
BRCA1	1.29847	10.5173	8.78397	4.45891e-17	2.7465e-15	28.1126	UP	10.0755	10.6064	9.79928	11.4793	12.4597	12.1118	10.4868	6.76818	11.6202	10.1972	9.24555	10.5236	10.7245	11.7258	9.77314	11.0775	10.4686	10.1874	11.6124	10.5999	9.15228	10.6064	11.3163	11.8925	11.0532	11.3509	10.69	8.81057	12.1624	11.032	9.89482	11.403	9.40088	11.7262	10.8895	9.55267	11.5699	11.0154	9.74147	8.47168	10.2479	10.3487
BRCA2	2.10431	9.98222	11.8577	4.65128e-28	2.73656e-25	52.9424	UP	9.68124	9.8009	9.57743	11.1954	12.0888	11.8811	10.5137	7.77479	11.6138	9.96723	8.7039	9.7364	10.6466	10.9665	8.8009	10.1072	9.86882	9.96	10.4727	9.87652	7.57743	9.5812	10.0154	12.3473	10.9593	10.3432	9.69174	7.94837	11.1491	10.0928	9.82496	10.6184	9.19722	10.6165	10.2264	8.74819	11.0084	10.7013	10.5555	8.41363	10.3663	11.0327
BRCC3P1	1.06471	3.91152	5.49792	6.80106e-08	6.6901e-07	7.52683	UP	3.45943	4.39232	3.16993	4.39232	5.16993	4.80735	5.83289	3.32193	5.24793	3.70044	3	3.58496	4.75489	4.32193	4.85798	4.39232	4.52356	4.08746	5.32193	4.16993	3.45943	2.80735	4.75489	5.97728	4	3.32193	4.32193	3.16993	5.04439	4.16993	4.75489	4.39232	1.58496	3.90689	4.39232	4.16993	5.04439	3.70044	3.32193	4.32193	4.58496	2.80735
BRI3BP	1.0998	12.0318	7.20883	2.77047e-12	6.58353e-11	17.3273	UP	11.5641	12.4853	12.1399	12.3829	11.7351	12.9938	12.7863	10.9196	12.8855	12.6917	11.9289	12.4192	11.923	13.311	10.9174	12.031	12.611	12.3592	13.2066	13.05	10.403	11.8638	12.4105	13.314	14.1561	12.5028	12.7518	9.66711	13.2574	11.2378	11.5503	12.9478	12.245	12.36	13.3024	10.4231	13.5573	12.3168	12.1808	9.97585	11.0471	12.2279
BRINP1	-1.14015	3.47206	-3.05765	0.00237824	0.00751575	-2.36007	DOWN	1	3.32193	1.58496	6.04439	2	4.52356	7.05528	4.08746	3.45943	0	4.24793	3.90689	2.80735	4.39232	4.75489	2.58496	5.83289	0	4	6.83289	1.58496	4.32193	1.58496	3.90689	4.39232	1.58496	1.58496	2	2	11.3264	5.90689	1.58496	1.58496	6.06609	5	5.2854	4.24793	5.67243	3.70044	4.16993	7.31288	1
BRINP3	-1.29989	3.46387	-3.30042	0.00105059	0.00364813	-1.61213	DOWN	2.58496	3.16993	1.58496	6.79442	2.80735	4.90689	1.58496	1	5.16993	2	2.80735	1	4.9542	6.45943	6.89482	1	4.75489	1.58496	2.58496	0	1	3	3.45943	11.6321	2	1	0	1	1	4.39232	2	5.45943	2	2.58496	0	3.58496	1	4.52356	2.80735	5.88264	4.16993	0
BRIP1	1.97977	9.04566	10.9633	1.11887e-24	2.98284e-22	45.2878	UP	8.90689	9.00843	9.16993	10.115	11.1743	10.0728	9.35975	5.72792	10.196	9.13955	7.39232	9.40301	9.84392	10.1189	7.61471	10.3476	9.28771	8.92481	10.3761	10.0512	7.59991	9.29232	11.2808	10.5622	9.74315	9.99859	9.27612	7.60733	11.3636	9.8392	8.20945	10.2992	7.9542	9.84706	9.25267	7.48382	10.6484	9.7039	7.43463	7.03342	9.39017	9.61102
BTBD16	2.27329	5.8189	6.98573	1.16426e-11	2.46459e-10	15.9292	UP	4.64386	4.90689	2.58496	5.42626	5.61471	6.30378	5.49185	3.80735	7.02237	6.2854	2.32193	3.32193	4.90689	6.47573	6.20945	7.26679	6.49185	6.33985	4.75489	4.75489	6.26679	6.44294	9.11114	6.65821	7.53916	6.10852	8.17991	4.16993	3.16993	5.52356	5.42626	4	7.96578	5.12928	8.31288	6.32193	5.55459	7.40939	6.39232	4.32193	2.32193	4.90689
BTC	-1.48937	8.52508	-6.45582	3.07154e-10	4.9024e-09	12.7486	DOWN	7.85798	7.76155	7.22882	6.9542	9	8.9542	9.38154	7.67243	8.6865	7.9542	6.59991	10.2336	10.7773	10.2119	10.2396	10.5255	7.31288	8.2854	8.32643	9.07414	8.32643	8.12412	9.82018	8.60733	9.3837	7.67243	7.73471	7.41785	9.4818	9.40301	9.72962	8.79766	7.18982	8.58871	8.15482	11.128	9.56224	9.52748	7.53916	9.21189	7.73471	8.20457
BTD	-1.03663	10.1582	-8.49999	3.64192e-16	1.93276e-14	26.0564	DOWN	10.2644	10.5226	9.77643	9.93811	10.9658	9.46148	10.5803	10.1306	10.4696	10.774	9.75154	10.0901	10.5118	10.8819	10.545	9.60363	10.0539	10.2621	8.37069	9.60177	10.5147	9.54496	10.7211	8.79442	9.72622	9.51373	10.3652	8.78463	9.13699	10.1137	10.7756	9.8009	10.1561	10.2935	10.4574	10.1836	11.1611	8.09276	9.74147	9.09276	10.0728	9.15228
BTG2	-1.61473	13.0012	-8.3936	7.90404e-16	3.89765e-14	25.2981	DOWN	12.5275	12.3225	12.0369	13.0718	13.802	12.9782	13.6449	12.5167	13.0644	13.6074	13.5115	13.4221	12.2831	13.9443	13.9861	13.2098	12.6587	12.6587	12.8335	11.5994	12.4898	11.7789	12.3095	12.5137	12.0286	13.186	12.7962	11.1222	13.2134	13.6713	12.981	13.2354	13.4458	11.6528	13.4436	13.8286	13.6979	11.3691	11.5579	12.2779	13.202	12.9527
BTNL2	-1.61592	1.40968	-7.26004	1.98326e-12	4.8479e-11	17.653	DOWN	1	0	0	3.45943	3.80735	1.58496	4.80735	0	0	0	2	0	1	2.32193	1	1	4.75489	0	0	0	0	3.70044	1.58496	1.58496	0	4.32193	0	0	1	1	0	1.58496	1	0	1	2.58496	1	5.83289	0	4.08746	0	2
BUB1	2.62578	10.8259	12.6793	2.83321e-31	3.45287e-28	60.2254	UP	10.9381	11.1618	10.9166	11.6869	11.1892	12.2333	10.5285	7.82655	12.4393	11.5656	9.33539	11.7785	11.733	11.8826	8.97154	11.5551	10.8978	11.3049	12.0735	12.0987	9.40939	10.825	12.221	12.3482	12.0032	11.4435	11.2697	8.91886	12.7611	12.0358	10.544	12.0631	11.0485	11.5226	12.1997	8.57365	12.1016	11.6926	9.61471	8.02791	10.7846	10.7936
BUB1B	2.5803	10.2161	12.494	1.53365e-30	1.63545e-27	58.5638	UP	9.79279	10.7557	10.007	11.6348	11.3129	12.0471	10.0993	8.09276	11.2761	10.8431	9.10066	11.1542	11.1731	10.769	8.65821	10.9535	9.92035	10.8431	11.1434	11.8918	9.07948	10.0835	10.2432	11.8317	11.2952	11.0815	10.3095	8.54689	12.2357	11.1737	10.4808	11.9352	9.94251	11.0021	10.9039	7.59246	11.6488	10.5304	9.14211	7.54689	10.4707	10.3794
BVES	-1.67518	8.30831	-5.69859	2.32291e-08	2.50528e-07	8.56224	DOWN	5.80735	8.0607	7.93074	9.63118	5.55459	8.22882	8.14466	8.10329	9.36194	5.08746	5.90689	9.66178	6.97728	8.60363	13.1849	6.12928	8.3966	6.64386	5.75489	6.40939	6.53916	7.97728	7.34873	6.30378	6.18982	8.68299	5.61471	6.18982	7.35755	10.3554	8.40088	7.06609	7.80735	9.62571	7.48382	13.1223	6.98868	7	9.01123	11.7061	10.1611	7.01123
BVES-AS1	-2.49648	2.95332	-7.68046	1.19519e-13	3.69763e-12	20.3929	DOWN	2.32193	3.45943	3.16993	4	0	2.80735	3.70044	3.32193	2.80735	0	2	4.9542	1	2.80735	7.17991	2	4.16993	0	2.58496	1	2	3.70044	0	1.58496	1	4.32193	0	1.58496	1.58496	4.64386	3.90689	2	3.80735	3.58496	2.32193	7.60733	2.32193	3.58496	3.32193	5.93074	4.08746	1.58496
C10orf55	1.03845	5.20315	4.80181	2.21396e-06	1.54339e-05	4.18637	UP	5.32193	5.52356	4.08746	7.02237	3.45943	5.12928	3.90689	4.24793	5.24793	3.58496	4	4.64386	5.61471	4.85798	5.64386	4.85798	5.12928	3.70044	4.16993	4.16993	3.45943	4.9542	6.6865	3.45943	5.83289	4.64386	3.32193	4.24793	8.07682	5.88264	6.22882	6.40939	5.16993	7.05528	4.85798	4.70044	4.80735	6.04439	5.20945	4.64386	7.99435	6.26679
C10orf82	-2.02104	3.20397	-4.88677	1.47751e-06	1.0704e-05	4.5727	DOWN	0	2.32193	1	8.73471	6.87036	7.07682	3.16993	4.08746	2.80735	1.58496	2.80735	2.32193	1	2.80735	4.52356	5.67243	5.67243	5.39232	4.16993	0	1	4.70044	2.58496	6.50779	0	8.37069	0	3	2	6.08746	4.08746	0	1	2.80735	3.32193	3.58496	1.58496	6.70044	3.80735	2.80735	1.58496	4.9542
C10orf95	1.11682	6.60749	5.5868	4.24222e-08	4.36291e-07	7.98151	UP	5.75489	7.94251	5.2854	8.56605	8.10852	8.50383	7.16993	5.39232	6.50779	6.90689	7.08746	6.18982	7.27612	6.91886	5.16993	5.12928	7.72792	6.37504	7.24793	8.28077	6.90689	6.90689	7.25739	8.90388	7.93664	6.10852	8.81057	3.80735	7.70736	8.62571	6.85798	7.31288	8.15987	4.45943	6.37504	6.44294	7.50779	6.90689	6.22882	4.52356	5.39232	6.87036
C11orf53	1.53023	6.1106	3.46175	0.000593576	0.00219974	-1.08519	UP	0	7.59991	7.17991	3.45943	5.35755	7.79442	8.3837	8.11894	7.53138	6.14975	5.70044	3.16993	1	7.91886	6.14975	7.14975	10.8918	8.633	4.9542	6.94251	8.33092	9.62022	5.12928	6.93074	6.33985	7.49985	9.59246	5.55459	0	3.90689	10.0293	4.16993	8.04439	7.48382	7.76818	6.06609	9.13699	5.24793	8.01681	3.70044	5.97728	6.59991
C11orf86	-1.76736	5.57046	-3.1058	0.00203064	0.00653775	-2.21605	DOWN	8.02791	3.16993	0	7.73471	3.58496	8.03342	5.70044	4.85798	8.80735	5.04439	7.13955	2	1.58496	5.08746	3.32193	4.16993	5.78136	7.01123	3	4.08746	8.68299	8.7879	8.57365	1.58496	9.96145	6.37504	7.12928	5.58496	0	6.02237	8.04985	4.32193	7.87652	2.58496	12.6996	0	9.51373	6.33985	8.25739	3	1.58496	8.33092
C11orf96	-1.43311	11.5344	-5.89165	8.02815e-09	9.55205e-08	9.58812	DOWN	11.0674	11.7557	11.3761	12.013	9.40514	11.7956	11.4558	9.64566	10.69	9.87191	12.7883	13.2741	11.8696	12.0458	14.0735	8.0607	12.1485	9.89026	9.63844	9.61471	11.0189	11.0815	11.6764	10.014	11.0437	10.7474	10.4019	10.128	10.6804	13.9868	13.5486	12.4926	13.9432	12.6911	12.1472	14.2059	10.3365	9.37504	11.8273	11.1586	14.4313	10.7313
C12orf54	-1.16848	2.31119	-4.62989	4.92987e-06	2.92619e-05	3.42311	DOWN	2.32193	1.58496	2	3.45943	3.70044	1.58496	3.16993	3	1	0	2.58496	3.32193	1	2	4.80735	3	2.80735	0	2.58496	0	3.16993	3.16993	2.32193	2.32193	2.58496	2.32193	4	4.90689	1.58496	1.58496	2.80735	0	2	2.58496	2.80735	5.61471	2	4.45943	1	3.80735	2	1
C12orf56	1.03866	4.19152	2.10086	0.0362685	0.0789559	-4.77055	UP	1.58496	6.45943	1	7.5157	7.04439	9.04985	4.58496	4.90689	3.45943	0	2	4.9542	2	3.58496	3	6.91886	7.27612	8.5157	4.32193	1	6.49185	7.2854	1	8.224	1	8.61839	2	6.79442	0	6.39232	2.80735	5.9542	2	9.01681	6.97728	2.80735	3	9.09276	2	3.32193	2.32193	4.80735
C12orf75	1.62493	12.1001	7.45119	5.60923e-13	1.52517e-11	18.8843	UP	13.0225	13.5906	12.5333	11.7561	10.255	13.2149	12.1434	10.6511	12.5861	12.3132	10.6266	12.3979	9.35975	10.4747	11.4914	11.1935	13.2011	13.6991	12.7026	11.5774	11.4722	12.905	13.224	13.0107	12.7926	13.6486	14.7341	10.4707	8.30834	13.0317	12.6702	12.6524	12.688	13.3066	13.3425	11.29	13.2414	11.7748	13.0074	9.79766	10.6786	12.5127
C14orf132	-1.77049	9.50029	-6.49165	2.47725e-10	4.01967e-09	12.9573	DOWN	5.49185	11.3117	7.67948	10.6671	7.24793	10.3219	10.3761	7.01123	10.1357	7.34873	10.0224	9.81218	8.69697	10.4502	13.6302	7.43463	8.80413	7	8.17493	6.59991	7.49185	9.79928	8.43879	9.29692	6.88264	7.01123	6.16993	8.26209	6.78136	10.5727	10.0334	8.40088	9.21675	10.5718	9.01402	13.5879	7.41785	7.77479	9.91289	11.5732	11.3961	8.48784
C14orf180	-2.19314	1.4189	-7.03853	8.31354e-12	1.80465e-10	16.2571	DOWN	0	0	0	0	1	0	3.58496	2.80735	0	0	4.70044	0	0	2.32193	7.39232	0	0	0	0	2.58496	0	1.58496	0	5.42626	0	1	0	2	0	2	3.80735	0	3.90689	1	1	0	2.32193	4.08746	0	3.16993	0	0
C14orf39	-1.47862	2.26262	-5.35175	1.45861e-07	1.32765e-06	6.79272	DOWN	1	2.58496	0	4.9542	2.80735	3.70044	1.58496	2.32193	3.80735	1.58496	3.32193	5.45943	1	0	5.75489	3.45943	4.52356	1	3.58496	1	2.58496	4.9542	1.58496	2	0	2.32193	0	1.58496	1.58496	2.32193	2	1	0	2.80735	1	6.39232	2.32193	4.75489	2	4.58496	1.58496	1
C15orf54	1.42542	2.07825	5.4879	7.17003e-08	7.00057e-07	7.47597	UP	1	2.58496	0	2.58496	3.16993	0	2.32193	1.58496	3.70044	1	1	0	0	3.16993	4.75489	0	2	2.32193	1	2	1	1	3.80735	3.16993	2	1.58496	0	0	4.52356	2.32193	2.80735	2	2.58496	5.35755	3.32193	0	2.32193	3	2.32193	2.32193	4.45943	2.32193
C16orf86	-1.05371	5.79039	-6.68618	7.58545e-11	1.37611e-09	14.1066	DOWN	5.88264	6.32193	5.04439	7.13955	5.78136	7.30378	6.80735	2.32193	5.85798	4.52356	6.88264	5.16993	5.88264	6.72792	7.71425	5.45943	5.78136	3.16993	4.08746	4.70044	5.39232	4.75489	5.52356	7.08746	4.85798	5.70044	2.32193	4.75489	5.39232	6.08746	6.58496	6.26679	5.08746	4.9542	4.45943	7.27612	5.61471	4.80735	6.16993	5.32193	6.70044	5.20945
C16orf89	-4.25568	6.847	-10.6935	1.10174e-23	2.39652e-21	43.0403	DOWN	2.32193	7.52356	4.9542	6.10852	3.45943	6.55459	7.7879	9.0607	7.10852	6.78136	10.3859	6.98868	5.85798	11.9773	8.87344	3.16993	10.0993	5.83289	5.49185	3.80735	7.80735	6.53916	5.45943	7.32193	3.80735	4.90689	4.58496	9.35975	2.32193	9.56986	6.88264	4	8.77479	6.30378	8.72451	9.54496	8.60733	6.91886	6.37504	7.01123	8.01123	5.45943
C17orf78	-1.69382	4.72211	-3.6839	0.000260753	0.00105852	-0.320935	DOWN	0	5.75489	3.16993	8.7039	3	5.52356	5.88264	1.58496	4	2.58496	8.29921	3.58496	2.32193	4.16993	5.55459	7.01123	6	8.3837	4.24793	3.16993	1	4.9542	4.52356	6.75489	8.20457	1	2.32193	2.32193	3.16993	2	4	2.58496	3	7.17991	3.16993	4	3	8.32643	3.32193	7.39232	4.75489	3.45943
C18orf54	1.15046	8.16995	7.79057	5.62095e-14	1.85682e-12	21.1295	UP	6.9542	8.59246	7.82018	9.46148	8.25267	10.1111	8.59619	6.97728	9.53722	7.97728	7	8.44708	9.03892	8.78463	8.77149	8.29462	8.2384	7.59991	7.59991	9.45327	6.52356	7.65105	7.70044	8.3443	8.26679	7.98299	7.40088	7	11.0708	9.40088	8.15482	9.69349	7.36632	8.9542	7.7211	7.91289	9.38586	7.90689	6.91886	7.04439	8.51175	8.39232
C19orf84	1.60454	3.58345	5.17086	3.6641e-07	3.04886e-06	5.90807	UP	4.24793	3.70044	4.08746	6.30378	1.58496	2.58496	4.32193	3	2.80735	2.80735	3.90689	3.58496	3.45943	2.58496	3.16993	2.80735	5.32193	0	2	2.80735	5.08746	4.16993	3.45943	9.46761	1.58496	9.08215	0	1	3.16993	3.80735	4.52356	4.39232	3.70044	3.32193	3.32193	2	5.08746	6.64386	5.04439	3.32193	3.45943	4.52356
C1orf112	1.49157	8.97221	10.8933	2.03142e-24	5.09706e-22	44.7017	UP	8.41785	8.88874	8.45533	9.86728	10.5392	10.6519	9.29002	6.6865	10.5897	9.20212	7.49185	9.02791	9.17493	8.69349	8.08215	9.90539	8.86109	9.15987	10.0993	9	8.01123	8.42626	10.0715	10.2889	9.27146	9.79604	9.64386	7.04439	10.4564	9.9629	9.46964	9.39874	8.61102	9.33539	9.67419	8.11374	9.81858	8.97728	8.2854	7.40088	8.84862	9.67948
C1orf94	-1.07402	1.20837	-4.92617	1.22236e-06	9.03246e-06	4.75396	DOWN	0	2	0	2.32193	1.58496	1.58496	2.32193	1	1	0	1	1.58496	1	0	4	0	3.80735	2.58496	1.58496	0	0	2	6.35755	2.80735	0	2	0	0	2	1	0	0	1.58496	1.58496	1.58496	2.58496	1.58496	3.32193	0	2.80735	2.32193	0
C1QL1	-2.72071	6.53405	-10.5293	4.36296e-23	8.31741e-21	41.6882	DOWN	6.61471	12.8017	4.75489	7.79442	4.75489	6.45943	3.80735	5.49185	6	6.55459	5.70044	6.2854	6	7.56986	8.76487	6.71425	7.10852	5.9542	5.85798	6.44294	7.20945	5	5.24793	11.5943	4.39232	6.72792	4.9542	6.04439	1.58496	8.73471	4.75489	4.64386	6	7.47573	8.00562	8.14975	6.97728	5.97728	7.08746	6.39232	5.83289	6.32193
C1QTNF2	-1.67383	6.33859	-7.81906	4.61833e-14	1.56036e-12	21.3214	DOWN	4.90689	7.7211	4.24793	6.49185	5.72792	7.21917	8.01681	3.16993	7.04439	5.64386	7.58496	7.67243	7.04439	7.64386	9.61655	4.90689	6.39232	5.2854	4.52356	5.12928	4.39232	5.75489	4.85798	6.94251	5.39232	4.64386	4.32193	5.12928	4.45943	7.63662	8.43463	4.90689	6.55459	7.33985	6.12928	8.46352	4.85798	6.61471	7.47573	7.29462	7.10852	4.58496
C1QTNF3	-1.38502	8.03214	-5.29626	1.94018e-07	1.71965e-06	6.51852	DOWN	5.52356	6.79442	5.67243	9.28771	8.07682	8.85487	8.33985	5.83289	9.22641	5.52356	8.67948	9.01681	9.16742	8.45121	10.6883	7.3837	7.32193	5.70044	7.85798	6.2854	7.82018	8.22882	6.97728	8.15482	7.12928	5.67243	6.67243	6.53916	5.2854	8.98014	10.0279	7.33985	8	8.61102	5.55459	9.75154	7.69349	7.8009	8.98014	7.37504	8.25739	7.07682
C1QTNF4	-1.74945	4.53363	-6.23048	1.16296e-09	1.63246e-08	11.4576	DOWN	3.70044	4.90689	5.20945	4.39232	4	4	6.45943	2.80735	5.12928	4.24793	7.25739	4.75489	4.45943	5	8.07682	0	4.45943	1.58496	5.35755	5.55459	4.70044	4.80735	5.49185	5.64386	5	4.32193	4.45943	3.45943	1.58496	6.02237	5.55459	3.80735	5.49185	4.52356	2	7.49985	5	4.70044	4.9542	6.50779	3.16993	3.45943
C1QTNF6	1.86236	9.82207	10.8941	2.01714e-24	5.09706e-22	44.7086	UP	9.32193	11.813	10.1434	12.0627	10.9858	10.9715	10.6457	6.89482	10.3376	8.81698	8.58871	9.9901	10.8986	10.1737	11.7164	9.0954	9.19967	8.63662	10.5699	9.55267	7.43463	8.56986	10.9527	9.88874	8.99152	10.0647	9.1267	7.45943	10.2633	11.3788	10.8925	10.6294	10.3718	10.7091	9.16742	8.62571	10.9091	9.66534	11.0382	7.26679	12.7499	9.13699
C1QTNF7	-2.29615	7.08924	-6.86551	2.48843e-11	4.9658e-10	15.1902	DOWN	5.88264	8.48382	5.80735	6.40939	3.90689	6.98868	9.09011	5.04439	7.25739	4.90689	7.91289	8.77808	5.08746	8.37069	10.0168	5.72792	7.34873	4.16993	5.16993	4.16993	6.2854	9.15987	5.20945	6.78136	4.24793	4.52356	6.44294	6.47573	4.08746	9.22882	8.05528	4.52356	8.38802	8.53916	7.57743	11.4594	5.64386	6.16993	7.81378	8.224	7.73471	6.58496
C1QTNF9	-1.62454	2.95231	-6.2569	9.96756e-10	1.42494e-08	11.6071	DOWN	2.32193	3.32193	2.32193	4	4.32193	3	4.08746	6.04439	3	1	5.42626	4.85798	1.58496	2.58496	6.32193	1.58496	5.04439	1	1.58496	3.16993	1.58496	4.24793	2.32193	3.45943	2.32193	0	2	2	1.58496	2.32193	3.90689	1.58496	2	3.70044	2.58496	3.32193	2	5.32193	3.70044	4.24793	2.32193	4.24793
C2	1.59176	10.9026	7.08546	6.15369e-12	1.36711e-10	16.55	UP	11.1235	13.0284	10.5147	11.8061	13.613	11.3548	10.6804	7.33985	10.8711	8.87652	10.3934	11.1693	10.2021	12.1824	11.0795	11.0888	9.84235	12.3699	9.84549	8.6865	11.6488	10.0168	9.03067	12.4602	11.8273	11.8265	10.7262	7.92481	12.5033	10.676	10.9794	12.4535	9.61287	9.11634	9.85798	9.92926	10.4009	11.2609	12.2538	8.88874	11.2161	11.815
C20orf144	1.10839	4.87847	6.33596	6.26459e-10	9.35637e-09	12.0573	UP	4.16993	5.49185	4.32193	6	7.04439	7.12928	5.80735	4	5.88264	4	3.58496	5.55459	3.32193	4.52356	4.52356	3.58496	5.20945	4.08746	4.64386	4.45943	4.32193	5.93074	5.32193	7.65105	4.08746	5.24793	5.24793	2.80735	5.04439	5	5.97728	3.45943	3.45943	5.55459	5.35755	4.9542	6.44294	5.52356	3.80735	3.58496	5.04439	4.9542
C20orf204	1.39222	6.10928	4.93038	1.19777e-06	8.87379e-06	4.7734	UP	4.64386	5	5.61471	7.56986	11.933	8.81057	6.78136	5.24793	7.06609	4.16993	4.70044	4.80735	6.10852	5.58496	5.97728	5.08746	5.24793	4.52356	5.55459	6.35755	5	7.7211	7.02237	8.84549	4	6.40939	4.45943	4	5.04439	5.85798	6.75489	5.80735	5.32193	6.97728	6.33985	5.85798	5.45943	7.35755	5.67243	4.85798	6.64386	5.78136
C22orf23	-1.55785	5.36779	-7.28156	1.72246e-12	4.27161e-11	17.7904	DOWN	3.70044	3.16993	4.52356	6.12928	5.90689	4	6.04439	4.58496	5.58496	3.16993	4.16993	4.80735	6.53916	6.12928	8.98299	3.70044	5.04439	3.90689	7.55459	4.58496	2.58496	4.52356	5.45943	6.24793	3.16993	3.80735	4.75489	5.04439	5.97728	5.39232	6.39232	5.24793	4.58496	6.30378	4.85798	8.71081	3.32193	5.52356	5.49185	5.9542	6.84549	4.9542
C22orf42	-1.17799	1.00502	-5.1697	3.68539e-07	3.06433e-06	5.90251	DOWN	0	6.45943	0	2.32193	0	0	0	0	1	0	0	0	0	3	0	3.16993	3	0	1.58496	0	1	1.58496	1	6.71425	0	0	0	2.80735	1	0	1.58496	0	0	1.58496	0	3.90689	1	4.16993	0	1	1	7.61471
C2CD4A	2.87495	8.75944	7.35778	1.04286e-12	2.68983e-11	18.2795	UP	3.70044	10.1098	10.0238	10.6018	4.58496	8.84549	7.88264	9.18239	11.7694	7.53138	7.85175	12.0488	6.40939	11.6891	8.07146	10.6156	8.78463	8.15987	10.1812	10.3276	5.2854	9.77149	9.19722	11.1923	10.6457	11.2125	10.3902	5.9542	4.64386	10.4147	11.2372	12.2497	10.4594	9.24317	9.53722	7.24793	10.8065	9.74987	6.20945	4.16993	12.545	10.5755
C2CD4D	1.53432	7.22066	7.12591	4.74216e-12	1.07666e-10	16.8037	UP	6.80735	8.90388	5.24793	6.67243	7.88264	9.92035	8.04985	6.75489	8.80413	7.73471	7.50779	6.40939	6.40939	7.93664	6	7.13955	6.93074	8.0607	7.59246	8.3837	5.9542	8.89785	8.01123	8.63662	7.56224	8.11374	7.75489	6.44294	5.52356	6.91886	9.13955	6.72792	8.10329	8.65464	7.10852	6.62936	7.94837	7.40939	7.33985	5.04439	7.5157	8.11374
C2orf15	1.50485	7.46369	8.34568	1.11813e-15	5.37394e-14	24.9587	UP	7.53916	6.89482	6.22882	7.87036	8.56605	8.29921	7.81378	6.20945	8.24317	7.47573	6.04439	7.63662	8.21917	7.89482	6.06609	8.09803	7.67948	7.69349	9.40939	7.40088	7.2854	9.07682	6.18982	9.74819	7.66534	7.55459	8.87652	6.14975	9.11114	6.64386	9.17243	6.71425	7.29462	7.5157	7.82655	6.45943	8.59619	9.2854	7.43463	5.24793	6.62936	7.64386
C2orf72	1.72805	10.2324	5.54084	5.41899e-08	5.42547e-07	7.74562	UP	9.75489	9.44915	9.31967	13.2867	9.8933	12.9817	12.6987	7.47573	12.2201	10.2252	9.76321	11.0147	6.30378	11.6922	8.15987	10.5098	9.96	12.4059	10.4727	12.0262	9.33316	11.1812	11.7895	11.7586	11.5887	11.8941	12.6766	8.67596	3	10.8978	10.1687	12.0577	9.87036	10.8757	10.821	9.42206	11.3691	10.5118	10.5353	6.10852	8.53528	11.7507
C2orf88	-1.20805	8.72096	-5.28746	2.02944e-07	1.78947e-06	6.4753	DOWN	5.20945	7.89482	8.26209	8.50779	7.26679	8.59991	11.5689	6.47573	9.98868	5.75489	7.56986	11.0464	7.49185	9.20701	9.47573	7.90087	7.65105	10.1396	7.62205	6.87036	9.00562	7.92481	9.75989	8.37938	8.08746	8.12928	10.2668	8.81698	9.10066	8.8392	9.85953	10.7347	7.43463	7.9542	9.07146	8.98584	9.65105	8.66534	7.79442	6.70044	9.72622	10.5118
C2orf91	1.1641	2.81822	3.79913	0.000167395	0.00071151	0.0929821	UP	1.58496	5.24793	3.58496	2.80735	1	2	5.32193	4.24793	5.61471	0	3.80735	2.80735	0	3.58496	2.32193	3.58496	4.08746	2.58496	2.80735	1.58496	1	3.58496	2	2	0	2.80735	0	1	1	2.80735	3.70044	4	1	2.58496	2.80735	4.16993	0	5.2854	0	3.70044	3	1
C3orf18	-1.49004	7.43288	-8.11251	5.92925e-15	2.41443e-13	23.3272	DOWN	6.14975	8.45121	5.72792	8.02791	8.73809	7.48382	8.82018	5.49185	7.42626	6.10852	7.25739	7.42626	6.96578	8.19476	9.74483	5.49185	6.82018	5.04439	7.12928	7.06609	6.02237	7.08746	6.67243	8.02237	5.80735	5.67243	5.83289	5.88264	8.02237	8.59246	8.18488	6.59991	7.45121	7.72792	5.35755	9.91737	7.7879	5.39232	7.22882	7.67243	8.01123	6.70044
C3orf52	1.00437	9.29279	4.76679	2.61115e-06	1.79318e-05	4.02887	UP	9.44294	9.12412	8.96578	9.15482	10.3106	11.6515	9.96578	9.43045	10.4584	9.58308	8.09276	9.28771	10.9061	10.4625	7.72792	10.3912	9.74651	10.3805	9.26913	8.08746	9.64024	7.98299	11.4476	9.06878	9.00562	9.49985	9.55459	7.5157	9.64024	10.3163	10.2324	9.7879	7.57743	9.65821	10.8819	7.85175	10.7448	9.24317	9.0607	6.70044	10.6475	9.37287
C3orf70	-1.30912	9.12753	-4.53128	7.71872e-06	4.37562e-05	2.99658	DOWN	5.80735	9.61655	7.01123	11.1978	10.9773	10.2264	8.59991	6.59991	11.1954	5.80735	9.06609	10.623	8.26679	9.91439	13.5993	10.7993	8.3443	9.29692	7.01123	6.45943	7.46761	9.80252	8.33092	10.0755	8.95128	10.2738	7.36632	6.79442	6.70044	10.0126	8.98868	9.49586	8.50383	9.76984	8.50383	13.0281	7.29462	9.66534	9.56605	11.6965	9.9263	8.74819
C3orf85	-1.33261	3.64399	-2.45713	0.0144219	0.0360326	-3.97426	DOWN	0	0	1	5.55459	2	10.0375	4.52356	0	3.32193	3.58496	6.44294	3.45943	1.58496	1.58496	1	8.87036	4.16993	5.04439	6	4.58496	0	4	6.16993	6.33985	6.52356	2.32193	4.08746	1	0	3.32193	0	4.16993	1	5.35755	4.70044	0	5.45943	7.82655	2.80735	6.22882	3.45943	3
C3P1	3.63077	4.29693	7.26957	1.8633e-12	4.58423e-11	17.7138	UP	2	0	5.24793	6.26679	5.72792	2.58496	4.80735	3.45943	9.55075	0	0	0	1	2.58496	0	5.67243	7.22882	3	4.58496	5.70044	4.70044	6.80735	5.08746	5.20945	1.58496	6.75489	0	2	3.45943	1	4.32193	3.16993	7.08746	8.64024	3.45943	3.80735	0	8.71081	7	4.39232	1.58496	1
C4B	1.04949	9.32583	3.70789	0.000237991	0.000975053	-0.235747	UP	7.62936	10.6627	8.80413	10.8313	6.55459	9.84549	12.3633	7.08746	10.2082	8.02791	8.69697	10.5517	8.89785	10.6457	13.4372	6.39232	10.0607	7.57743	7.35755	6.06609	9.30606	10.1459	7.76818	10.6573	8.45943	8.68299	7.97154	6.91886	6.96578	10.5304	10.23	9.28309	10.6573	8.34873	8.99152	11.1331	8.7039	5.55459	10.4346	10.4605	9.48985	10.1306
C4BPA	3.03916	6.39455	6.30379	7.57208e-10	1.11183e-08	11.8735	UP	8.18488	7.55459	3.90689	6.53916	5.35755	7.83289	8.09276	5.52356	6.52356	3.16993	4	5.97728	1.58496	7.45121	5.20945	5.04439	7.40939	10.0728	8.25739	3.16993	9.38802	6.39232	8.633	9.35094	8.14466	9.01402	8.84862	6.37504	1.58496	6.90689	4.24793	4	2.80735	9.88722	4.64386	4.80735	4.64386	6.71425	8.70044	5.42626	10.9388	9.04166
C4BPB	1.73282	8.3648	4.40173	1.37424e-05	7.42705e-05	2.44889	UP	7.40088	9.96867	5.39232	4.90689	4.70044	9.92481	7.93074	8.31741	11.0105	8.50779	6.02237	10.7381	10.3004	9.16742	6.45943	8.20457	7.97728	9.72962	8.66888	9.35755	9.2384	7.64386	11.8186	7.02237	10.2935	10.0471	8.32193	7.15987	8.76155	9.40088	10.2009	11.3891	7.94837	10.4126	11.4057	7.17991	10.8186	9.00562	8.73471	5.45943	11.1228	10.5736
C4orf48	1.25035	8.96214	5.04883	6.72188e-07	5.28189e-06	5.32635	UP	7.97728	10.9174	7.55459	9.63481	8.59619	11.4471	7.74819	9.42626	10.1636	6.32193	10.058	10.0768	8.70736	8.88874	8.93369	8.83605	7.67948	10.9658	11.2952	6.70044	8.90087	11.2294	10.0993	10.1649	10.7814	10.0224	9.29462	7.02237	6.62936	10.363	10.4189	10.3476	11.168	9.74819	7.77479	8.78463	9.12153	9.98299	8.8392	8.53138	9.57743	10.0154
C5orf17	-1.49705	2.38854	-4.53905	7.45292e-06	4.24155e-05	3.02989	DOWN	2	3.32193	2	4	0	5.52356	4.08746	2.32193	2	6.52356	2.80735	6.79442	1.58496	3.70044	5.24793	2	5.64386	0	3.80735	1.58496	0	4.80735	0	2	0	4.64386	0	2.80735	3.58496	3.90689	2.32193	0	1.58496	1	2	2.80735	1	5.97728	1.58496	2.32193	3.16993	5.64386
C5orf34	1.6652	7.73364	9.57323	1.03192e-19	1.00897e-17	34.0615	UP	7.40939	8.20457	6.6865	7.91886	10.0444	9.98868	8.15482	6.37504	8.08215	7.33985	6.18982	7.90689	7.26679	8.16491	7	8.42206	7.61471	6.87036	8.49185	7.56224	7.34873	7.64386	7.80735	8.9542	8.31741	7.33092	7.91886	6.53916	8.98014	8.30378	6.96578	7.91289	7.49985	8.37938	7.55459	7.5157	8.16491	8.58496	6.67243	6.35755	9.04712	7.56224
C5orf38	-1.21647	5.3118	-2.27057	0.0236953	0.0551365	-4.40636	DOWN	5.80735	8.07146	4.9542	5.61471	3	0	8.07146	5.08746	3.45943	2.80735	4.16993	1	1.58496	6.33985	4.70044	1	8.61471	0	8.49185	9.10852	6.75489	7.63662	2.32193	8.00562	2.80735	2	9.77808	6.06609	2.58496	4.75489	7	3.16993	9.02514	9.40088	0	5.42626	8.82018	4.24793	7.78136	3	5.12928	9.76818
C5orf46	2.48195	3.30359	5.7936	1.38187e-08	1.56298e-07	9.06353	UP	4.64386	4.80735	4.32193	4	4.85798	2.58496	2.80735	0	5.85798	0	0	6.76818	4.39232	1	4.90689	3.16993	4.75489	0	5.2854	0	6.50779	4	4.75489	2	3.45943	2.58496	2.58496	3.90689	6.82018	5.39232	6.59991	5.16993	5.24793	5.49185	4.32193	3.80735	1	4	5.97728	3.90689	6.97728	2.32193
C5orf58	1.3161	4.66177	4.78136	2.43816e-06	1.68762e-05	4.09429	UP	4.58496	3.70044	4.70044	7.33985	2.32193	7.73471	7.2854	7.75489	2.58496	1	3.58496	2.58496	4.85798	5.64386	5.16993	3.58496	5	6.75489	2.32193	2.80735	6.10852	3.32193	3	4.52356	3	7.89482	5.32193	3	7.11894	4.45943	7.93074	5.24793	3.70044	5.90689	3.58496	3.90689	5.93074	3.32193	3.80735	4.70044	6.93074	5
C5orf66-AS1	-3.47069	4.38034	-9.17021	2.38465e-18	1.87497e-16	30.9821	DOWN	3.80735	6.98868	3	2	3.45943	3.45943	1.58496	5.70044	4	3.90689	5.52356	5.88264	2.80735	5.32193	0	2	4.24793	3.58496	2.80735	5.32193	6.44294	6	5.20945	4.32193	3	5.24793	4.32193	8.45943	0	5.70044	3.45943	0	6.06609	5.39232	4.39232	9.43045	3.32193	4.52356	2.80735	1.58496	3.90689	4.52356
C6	-1.29094	5.75077	-2.928	0.00360329	0.0108263	-2.73714	DOWN	5.20945	9.14211	5.12928	4.90689	1	6.47573	9.93811	5.04439	4.64386	4.08746	7.64386	3.58496	1	6.71425	9.24793	5.55459	7.32193	5.85798	3.90689	2.80735	7.13955	6.74147	13.6718	3.80735	4.24793	3.16993	5.2854	4.75489	2	4.9542	5.24793	2.32193	3.70044	3.90689	4.75489	6.84549	8.06609	7	5.35755	5.58496	5.32193	3.70044
C6orf15	1.62211	2.29979	3.20189	0.00147265	0.00492626	-1.92224	UP	6.35755	1	1	4.64386	10.7313	2	0	5.16993	3.45943	0	0	1	1	1	3.70044	0	3.16993	0	8.82655	1	1.58496	7.88264	3.90689	1	0	2.80735	3.80735	1	1.58496	0	3.58496	4.90689	2	0	0	1	0	3.16993	0	4.9542	0	1
C6orf223	3.07093	7.92993	7.09584	5.75606e-12	1.28463e-10	16.615	UP	8.88264	7.12928	7.07682	8.74147	11.6595	8.74147	8.15987	4.70044	7.08746	5.42626	5.20945	6.24793	10.4346	8.2384	4.90689	9.75989	8.02791	9.69174	10.9337	8.13955	6.24793	4.39232	13.5097	9.15482	10.0607	6.39232	8.95128	6.71425	6.22882	7.35755	5.20945	9.80413	9.64566	9.53138	6.80735	5.20945	8.0607	7.49185	10.6294	5.08746	6.33985	7.86419
C6orf58	-3.12926	5.6328	-4.99356	8.81378e-07	6.72093e-06	5.06689	DOWN	1	11.2426	0	5.85798	4.80735	3	4.75489	12.906	10.3219	8.28077	1.58496	4.52356	7.69349	16.0547	4.85798	4.70044	12.1121	3	3.16993	3	7.49985	3	4	5.83289	4.75489	6.6865	4.08746	10.8289	2.58496	10.3587	3.45943	1	9.19722	4	11.5088	4.80735	10.2761	5.24793	3	3.58496	4.80735	4.85798
C7	-3.21342	9.74603	-6.20722	1.33149e-09	1.84623e-08	11.3265	DOWN	7.64386	14.5774	8.08746	10.1059	3.16993	9.57554	15.9823	6.58496	10.6303	7.49985	12.4294	11.1649	8.56605	11.0681	14.7105	10.8162	10.0634	6.33985	6.44294	4.58496	10.4939	8.60363	6.70044	10.6786	5.85798	5.93074	6.35755	10.6627	2.32193	12.4236	12.4592	6.12928	9.79766	10.341	7.92481	13.1306	8.72451	8.81698	10.5613	12.329	7.35755	8.11374
C7orf69	1.62607	1.6408	6.70073	6.93534e-11	1.27443e-09	14.1937	UP	2.80735	0	3.70044	4	0	3.70044	2	0	4.08746	0	1	0	2.80735	2.80735	0	2.58496	4.39232	1	1	1	0	2.32193	2	2.58496	1	0	1	0	2.32193	4.16993	3.58496	1	2.80735	1	2	2.80735	0	5.16993	0	2.58496	2	2
C8orf31	2.02861	7.04112	6.28167	8.62192e-10	1.24879e-08	11.7476	UP	10.3151	7.16993	8.08215	8.14975	9.28077	7.93664	7.7211	5.61471	6.49185	7.67243	5.35755	4.24793	9.27845	4.16993	6.64386	5.32193	6.96578	8.93958	4.52356	3.90689	7.53138	7.21917	4	9.16742	3.45943	7.98868	9.75154	5.97728	9.33316	5.49185	8.87652	4.24793	6.65821	7.12928	8.88874	5	7.39232	8.17493	8.12928	5.04439	6.20945	9.77479
C8orf34-AS1	-1.39989	1.94381	-5.97858	4.93015e-09	6.10215e-08	10.0595	DOWN	2.32193	2.32193	1	1.58496	0	6.40939	2	2.32193	3.58496	0	1	1.58496	1	2.32193	2.58496	2	3.32193	0	1	1	2	3.45943	1.58496	2.32193	0	1	1	2	1	4.08746	1.58496	1.58496	2.80735	3.80735	3.16993	1	2.32193	5	0	2.32193	3.58496	2.80735
C8orf48	-1.13436	4.02917	-5.12943	4.50834e-07	3.66641e-06	5.70919	DOWN	4.58496	5.72792	3.32193	6.49185	1.58496	5.42626	4.75489	1	4.70044	2	4.58496	3.70044	4	4.70044	6.75489	2.32193	3.45943	2.58496	3.70044	2.32193	3	2.80735	3.90689	4.16993	3.45943	5.24793	1	2.80735	3	5.32193	5.16993	3.58496	4.75489	5.32193	3.32193	5.64386	1.58496	2.80735	5.12928	4.85798	5.61471	3.90689
C8orf74	1.07759	3.00462	3.04754	0.00245778	0.00773275	-2.39001	UP	0	2.80735	1	3.70044	3.16993	1	5.45943	1.58496	4	0	2.32193	0	1.58496	4.08746	2.32193	6.04439	5.49185	0	4.85798	1.58496	0	4.85798	5.49185	0	3.70044	0	2.80735	3.45943	5.75489	0	4.32193	3.90689	0	3.45943	4	2.80735	3.16993	6.16993	2.58496	4.08746	1.58496	4.85798
C8orf88	-2.39762	5.31594	-7.01549	9.63171e-12	2.07364e-10	16.1138	DOWN	2.80735	4.70044	5.35755	7.05528	3.80735	3.70044	5.80735	4.52356	6.24793	3.58496	4.70044	7.99435	5.04439	5.42626	9.90087	2.80735	5	2.58496	1.58496	2.58496	4.16993	6.10852	3.32193	4.39232	3.32193	4.08746	4.16993	3.45943	4.08746	7	6.6865	3.16993	5.90689	6.83289	4.80735	10.9484	3.45943	4.70044	6.06609	8.88264	6.32193	4.39232
C9orf24	-1.46197	5.67568	-4.80376	2.19362e-06	1.53078e-05	4.19518	DOWN	1.58496	10.7389	3	5.20945	8.01123	4.58496	4.45943	6.45943	5.64386	6.67243	7.45121	4.52356	4.45943	7.5157	6.33985	5.64386	6.45943	5.97728	4.52356	8.99435	5.72792	5.55459	8.61471	3.80735	8.08746	4.39232	4.39232	3.16993	6.62936	3.90689	4.32193	6.97728	4.80735	4.08746	7.66534	7.62205	7.5157	6.64386	4.70044	5.39232	3.70044	5.49185
CA1	-1.12739	5.05801	-2.33696	0.019926	0.0475892	-4.2564	DOWN	2.58496	6.32193	3.90689	7.58496	4.64386	7.25739	4.9542	1.58496	7.59246	3.58496	7.25739	3.45943	3.80735	9.92184	2.58496	4	6.35755	2.32193	4.24793	11.0126	7.6865	5.64386	4.64386	3	11.8661	4.64386	5.49185	2.58496	2.58496	7.34873	4.32193	8.21917	2.32193	3.45943	4.24793	4.16993	6.2854	7.16993	7.70044	4.64386	3	4.58496
CA10	-1.8415	2.27523	-6.08765	2.65302e-09	3.43965e-08	10.659	DOWN	0	10.8065	0	4.24793	0	0	4.08746	1.58496	1	1	1.58496	2.80735	2.32193	3.90689	4.70044	4.32193	4.08746	0	0	1.58496	1	2	0	2.32193	0	1.58496	0	1	0	6.75489	1	1.58496	0	2.32193	2.80735	3.16993	3.16993	4.16993	2.32193	3.70044	1.58496	2.80735
CA11	-1.4913	8.27467	-8.86339	2.45831e-17	1.61322e-15	28.6959	DOWN	8.08746	9.70217	8.11894	8.22882	8.56224	8.94544	8.98014	8.10852	7.66534	7.71425	8.63662	8.00562	8.05528	8.14466	10.0182	6.97728	8.09276	8.37069	7.59246	7.27612	7.79442	8.633	5.93074	8.02791	8.16993	9.44501	7.8392	7.64386	7.47573	8.53528	8.55842	7.54689	7.88264	7.2384	6.98868	9.53916	8.50383	8.27612	8.67596	7.85798	7.87652	7.62936
CA2	-1.25293	12.0588	-2.85145	0.0045739	0.013355	-2.95244	DOWN	12.4416	9.57932	10.8408	8.8392	7	8.0607	13.6281	13.4746	14.4261	12.935	10.1228	11.0389	14.3524	15.2745	11.7515	8.67948	13.0989	14.9572	9.40088	14.7645	14.7855	11.4205	11.183	7.06609	12.8965	12.5399	12.7078	12.2524	8.28077	10.2288	12.9313	11.5294	12.6142	13.6466	16.4707	9.81057	16.4122	8.32643	12.9243	6.94251	12.1978	13.0301
CA4	-2.22848	4.89311	-4.51289	8.3844e-06	4.71816e-05	2.91795	DOWN	0	6.40939	4.24793	10.3597	3	9.61655	3.45943	5.88264	2.58496	2.32193	5.90689	0	3.32193	3.70044	5	1.58496	5.16993	9.52748	2.80735	2	4.70044	2.80735	4	7.39232	7.06609	5.20945	0	2.80735	3	13.3442	2	3.32193	4.08746	4	4.32193	2	4.52356	6.56986	8.59246	4.58496	6.08746	5.35755
CA7	-1.14902	3.20353	-3.50116	0.000514554	0.00193548	-0.952862	DOWN	0	2.32193	1	2.80735	5.97728	2	4.64386	5.45943	5	1	4.58496	1.58496	1.58496	4.85798	2	5.49185	5.90689	0	5.24793	4	3.32193	5	4.80735	3.70044	3.32193	0	0	0	0	3.45943	1	4.52356	2	3.32193	2.58496	3	2	6.70044	3.58496	3.16993	2	2.32193
CA9	-1.08813	8.97276	-2.12851	0.0338954	0.0746272	-4.7131	DOWN	6.50779	8.59246	5.04439	8.49985	8.06609	3.58496	9.65642	13.4557	8.62571	9.7211	10.9965	7.53138	6.33985	10.1176	7.65821	11.0694	11.0627	7.5157	12.6928	10.8001	10.9564	7.31288	10.0808	7.33092	9.41151	6.14975	11.1111	8.65821	5.08746	8.27612	7.46761	12.2216	9.90689	5.78136	11.9701	8.64746	14.3471	8.53916	11.5319	6.47573	10.9285	8.3443
CAB39L	-1.87279	9.62626	-9.66532	4.97672e-20	5.19344e-18	34.777	DOWN	8.64386	8.43879	8.03892	9.04985	10.6073	10.3815	9.86264	8.12928	10.3454	7.73471	8.66178	10.1085	9.92481	10.0795	11.8788	9.28771	9.16491	8.39232	11.0914	8.23362	8.47573	9.45533	9.87344	11.0375	8.29921	7.25739	9.59432	8.73809	8.97441	10.1874	10.703	8.64386	9.45943	9.19722	9.57932	12.3534	8.89785	9.35975	9.02514	10.6064	9.47168	9
CABCOCO1	-1.60609	4.18379	-6.09587	2.53109e-09	3.2966e-08	10.7045	DOWN	0	4.08746	4.08746	6.26679	6.06609	5.45943	4.24793	5.08746	3.45943	3.16993	3	2.80735	2	5.12928	6.59991	3.58496	5.20945	5	3.90689	2.58496	2.80735	4.64386	3.80735	6.56986	3.45943	4.39232	4.80735	0	3.32193	6.22882	7.53138	3.32193	3.70044	3.70044	5.35755	5.04439	3	4.08746	6.40939	3.70044	4.64386	2.58496
CABP7	-1.06192	4.2254	-5.28911	2.01242e-07	1.77584e-06	6.4834	DOWN	2.32193	6.91886	2.32193	4	4.32193	3.70044	5.20945	3	4.32193	3.16993	3.45943	4.64386	3.70044	3.90689	4.32193	3.32193	5.08746	1.58496	4.39232	3.58496	2.32193	4.45943	3.16993	8.43045	3.32193	3.45943	3.70044	2	3	3	5.24793	3.58496	3.32193	5.24793	2.32193	4.39232	4.58496	5.16993	4.90689	4.16993	3.32193	4.39232
CACNA1D	1.49968	8.84915	5.75897	1.67121e-08	1.85217e-07	8.87999	UP	9.58684	10.1749	9.35535	10.568	11.3387	10.8154	11.0566	7.49985	9.81698	8.62205	8.53916	8.66888	9.49985	9.47371	9.08746	10.7465	8.633	9.44087	9.46964	6.76818	6.72792	10.062	9.87498	10.4136	8.3966	7.09803	8.98014	7.33092	2.80735	8.18488	9.36194	4.58496	6.9542	11.4558	8.09276	9.90989	8.91886	9.41996	8.18982	8.47978	11.4393	8.85175
CACNA1E	1.46602	6.15162	4.06715	5.71697e-05	0.000269866	1.10146	UP	5	8.64746	5.45943	10.2808	13.6454	6.98868	6.24793	3.90689	8.19476	3.16993	7.87652	4.24793	5.55459	6.30378	7.14975	11.1935	7.12928	3.45943	7.13955	4.70044	3.32193	6.42626	4.80735	7.76818	4.58496	6.14975	2	0	5.83289	5.52356	5.16993	6.56986	5.67243	8.25739	4.9542	6.80735	4.75489	12.8289	4.64386	6.80735	7.35755	5.32193
CACNA1H	-1.32828	11.0404	-4.65354	4.42211e-06	2.65202e-05	3.52662	DOWN	10.0634	13.9444	9.82018	11.9263	9.25974	10.5362	11.6271	8.22882	12.2476	8.80413	9.59432	12.1796	10.7773	11.7275	15.3603	9.20212	10.9801	8.24317	9.40301	11.964	8.26679	11.2131	11.5981	14.1101	9.43463	8.25267	8.20457	8.69	9.90388	13.0979	11.774	10.8595	10.9491	14.2923	10.9024	15.2876	9.87652	7.62936	11.9322	13.3028	12.8357	9.76321
CACNA2D2	-1.13199	7.39352	-4.83287	1.91094e-06	1.3498e-05	4.32692	DOWN	5.24793	12.2033	4.85798	8.48382	8.66888	7.34873	8.55842	9.34651	6.37504	5.2854	6.37504	6.76818	7.53138	8.80413	8.99435	5.55459	7.45121	5.12928	6.52356	6.55459	7.07682	8.63662	7.3837	13.4079	5.12928	6.79442	7.96578	7.06609	6.70044	8.96867	6.56986	6.04439	6.12928	8.99435	6.22882	8.21917	7.93664	6.9542	7.22882	7.57743	8.61102	6.44294
CACNA2D3	-1.81382	5.83048	-7.46292	5.18703e-13	1.42431e-11	18.9606	DOWN	3	6.71425	3.80735	6.98868	5.08746	5.20945	8.25267	3.16993	5.12928	3.58496	6.6865	6.37504	5.97728	6.47573	9.36194	5	6.87036	2.58496	5.24793	5.20945	3.32193	6.90689	5.97728	7.58496	5.2854	3.45943	5	6	4.70044	6.10852	7.47573	4.80735	5.80735	7.60733	5.20945	8.04985	4.52356	7.05528	6.45943	7.50779	7.59991	6.06609
CACNB2	-1.27619	7.85746	-5.26159	2.3159e-07	2.01569e-06	6.34847	DOWN	4.08746	10.3619	6.49185	8.66178	7.04439	8.82337	8.88874	5.52356	8.16491	4.39232	7.31288	8.51964	6.62936	7.85175	11.6124	6.79442	8.61839	5.72792	7.33985	5.24793	6.16993	8.61102	7.33092	8.39232	6.16993	7.5157	6.37504	6.06609	6.37504	8.67243	8.36194	6.93074	7.39232	8.57743	7.06609	10.6138	7.27612	9.28771	7.76818	9.30834	11.0189	7.41785
CACNG8	1.61354	5.72577	5.31187	1.79091e-07	1.59856e-06	6.59544	UP	7.19967	4.70044	8.90388	7.54689	3.58496	3.70044	7.22882	2.32193	7.30378	2.58496	4.45943	4.64386	5.58496	6.58496	7.21917	7.04439	6.26679	4.70044	5.08746	7.27612	3.90689	5.90689	6.2854	7	7.41785	8.26679	5.97728	5.67243	4.75489	6.26679	5.35755	4.70044	5.24793	5.24793	8.46761	4.85798	8.40514	8.85487	4.9542	4.39232	8.7879	3.58496
CAD	1.1609	12.3371	10.0508	2.24717e-21	2.94933e-19	37.8172	UP	12.1596	12.0447	11.3939	13.5022	13.3489	14.0828	12.8568	9.42626	13.7357	12.8254	11.8082	12.6472	12.7768	13.0217	12.3046	12.1134	11.9458	11.8094	12.9531	12.2387	10.9388	11.7117	13.5852	13.5085	12.5505	12.8086	11.6987	10.5594	13.2663	12.7446	12.2393	13.6374	12.1325	12.0021	13.121	11.5058	12.93	12.0279	10.7936	10.5187	12.6346	12.0362
CADM2	-3.52029	4.61244	-8.71263	7.59016e-17	4.52809e-15	27.5917	DOWN	2	4.58496	2.58496	6	0	8	4.08746	2.32193	7	1.58496	4.70044	7.02237	2.80735	4.75489	9.74987	4.16993	7.15987	1	5	0	6.12928	6.44294	2.32193	4.75489	2.58496	2.80735	0	6	1	5.78136	4.80735	3.45943	3.58496	5.12928	4.70044	8.224	4.45943	7.08746	4.90689	9.15228	5.42626	3
CADM3	-4.35575	6.12487	-9.76128	2.31741e-20	2.56751e-18	35.527	DOWN	2.80735	10.5028	6	6.98868	4.70044	7.62205	10.4041	3.90689	6.26679	5.12928	9.39232	7.90087	5.78136	8.3837	11.9363	1.58496	8.31288	0	2.58496	2.32193	6.97728	5.97728	4.32193	6.78136	1	2.58496	2	6.93074	3.90689	7.75489	7.88264	5.20945	7.08746	5.61471	6.59991	9.70736	6.16993	3.70044	7.54689	7.11894	5.64386	6.47573
CALB2	-1.15614	5.65334	-2.81212	0.00516001	0.0148453	-3.06092	DOWN	3.32193	2.80735	3.32193	6.18982	2.80735	6.04439	5.9542	2.80735	8.47978	2	6.2854	6.40939	3.32193	5.24793	10.8781	6.85798	6.20945	5.75489	4.64386	8.38802	1	9.49185	9.86728	3.80735	4.45943	3.58496	5	4.39232	8.18488	6.71425	6.18982	5.61471	5.49185	6.24793	4	6.45943	3.70044	7.45943	9.74147	4.64386	3.90689	3.70044
CALHM1	-1.04109	2.0735	-3.82457	0.000151558	0.000651932	0.185979	DOWN	0	2.32193	2.32193	2.80735	6.47573	2	3.32193	0	1	0	2.32193	2	2	3.58496	1	1.58496	4.39232	1	1.58496	1	0	2.32193	0	8.91289	1.58496	0	2.58496	1	0	1.58496	2.58496	1.58496	1	1	1.58496	2.80735	2.32193	5.20945	0	3.32193	3.32193	1.58496
CALHM3	1.57923	3.02661	3.80257	0.000165163	0.000703622	0.105539	UP	5.04439	3.32193	1	3.16993	10.3421	3.58496	1	6.08746	2.58496	6.52356	2	1	3.32193	6.04439	0	0	3.16993	4.64386	1.58496	2	5.08746	3.32193	1.58496	5.67243	3	3	9.16239	3.70044	2	1.58496	6.78136	0	9.72281	0	4.80735	1.58496	3	5.12928	0	3.16993	1	1.58496
CALML5	-1.89363	1.93626	-3.84264	0.000141185	0.00061124	0.252362	DOWN	1.58496	0	0	0	14.6195	1.58496	1	3	0	1	0	7.85798	2	4.32193	1.58496	0	2.32193	0	0	1.58496	5.39232	3.90689	0	2	0	0	7.76818	5.88264	0	1.58496	1.58496	0	13.2916	2	2	0	2.32193	2.58496	0	1	10.5216	0
CALY	-2.77373	3.77469	-7.68386	1.16783e-13	3.6261e-12	20.4155	DOWN	2	11.4939	2.58496	4.39232	2.32193	2.80735	5.35755	4	2.32193	3	4.45943	5.93074	0	5.04439	7.42626	1.58496	5.20945	1.58496	2	2.58496	3.16993	5.32193	1.58496	9.0607	2	4	1	3.80735	1	4.64386	3.45943	2	3	2	1	10.8978	3.90689	6.14975	6.18982	4.70044	3.58496	1.58496
CAMK2A	-1.22209	4.90864	-4.13964	4.23128e-05	0.000205564	1.38511	DOWN	2.58496	5.32193	2.80735	6.24793	3.90689	4.45943	4.52356	3.58496	6.39232	2.32193	4.90689	6.08746	4.75489	4.90689	8.56605	5.39232	5.64386	2.32193	5.75489	3.80735	1.58496	5.85798	4.90689	6.58496	5.70044	1	3.45943	3.32193	4.32193	5.64386	4.32193	5.20945	3.58496	4.52356	3.80735	7.97154	3.45943	7.53916	4.24793	6.91886	7.03342	4.08746
CAMK2B	-1.74343	5.02339	-6.12459	2.14651e-09	2.82918e-08	10.8641	DOWN	2	8.56605	2.58496	5	6.53916	6.10852	5.88264	5.39232	4.16993	0	4.32193	4	4.16993	5.45943	6.71425	5.35755	6.85798	4.16993	5.67243	3.32193	3.80735	5.64386	2.32193	13.2512	3.32193	4.75489	4	5.12928	3	5.2854	5.20945	6.56986	5.64386	4.45943	4.16993	6.65821	5.58496	7.82018	4.64386	5.04439	4.32193	5.08746
CAND2	-1.50741	7.56786	-5.45205	8.65652e-08	8.29762e-07	7.29461	DOWN	5.80735	10.2372	6.30378	9.35315	9.99718	8.75822	9.5157	5.83289	7.93664	5.61471	7.91289	8.19967	6.72792	8.6865	11.4221	5.08746	7.56986	6.40939	5.49185	5.04439	6.42626	8.43463	6.42626	6.85798	4.85798	9.72451	5.83289	5.67243	5.20945	9.40301	8.2384	5.83289	7.27612	7.40939	6.71425	10.9744	6.37504	7.22882	8.09276	9.62205	8	6.67243
CAP2	-1.14633	9.12562	-4.2398	2.77168e-05	0.00014012	1.78461	DOWN	7.58496	9.82655	8.59991	9.89785	8.71081	10.1033	9.36194	6.61471	9.94983	5.90689	7.47573	10.3421	9.29462	8.98299	12.8823	8.32193	8.35755	7.62205	8.31288	9.20701	6.89482	8.96578	10.0028	7.14975	7.35755	9.76155	8.38802	7.65105	6.55459	10.1459	10.3805	6.85798	9.18239	10.115	7.61471	13.275	8.3443	8.88264	9.67243	11.6142	9.22159	8.49985
CAPN10-DT	1.20588	6.5572	7.39117	8.36084e-13	2.21339e-11	18.495	UP	5	3.80735	4.80735	7.34873	8.20945	7.69349	8.14975	4.64386	7.69349	5.80735	5.32193	5.24793	6.45943	6.32193	6.45943	7.19967	6.96578	6.30378	7.31288	7.08746	5.72792	7.7211	7.45943	9.33762	5.72792	6.47573	7.04439	5.12928	6.90689	6.32193	8.11894	6.76818	5.42626	6.88264	6.56986	7.11894	7.15987	6.42626	6.08746	5.93074	6.74147	6.30378
CAPN12	1.14154	7.87592	4.15499	3.96773e-05	0.000194059	1.44578	UP	4.24793	6.30378	6.71425	9.07682	10.3955	8.65464	8.98584	7.89482	7.6865	5.61471	5.97728	7.59991	6.40939	7.85175	7.88874	7.85175	7.78136	9.71768	5.85798	8.08746	8.633	9.24793	8.2854	7.42626	5.12928	9.24079	4.80735	7.14975	6.64386	8.24317	11.1954	6.58496	7.70044	10.4959	8.45121	7.70044	8.31741	9.46761	9.86573	5.52356	9.62936	10.4594
CAPN6	-1.3123	9.18895	-2.59413	0.00982558	0.025921	-3.63587	DOWN	10.0634	8.81698	5.24793	6.64386	8.21917	10.6653	10.643	8.71081	11.4041	11.3365	12.4051	8.66178	7.07682	11.8325	12.4365	4.80735	11.2222	12.4793	4.45943	8.10852	9.00843	7.80735	6.08746	11.0272	3.70044	2	6	8.6865	3.32193	10.6865	8.85175	7.87652	9.94544	8.69349	9.54303	12.0283	11.2779	8.49985	11.1222	11.3009	8.77149	10.352
CAPN8	1.06487	10.7843	2.59996	0.00966297	0.0255354	-3.62108	UP	12.0778	7.61471	9.78953	9.63662	8.90989	12.5358	11.7883	11.043	13.3767	11.3652	9.26679	11.137	13.6891	13.2755	9.91588	12.4548	12.1286	11.5147	10.8788	9.70217	13.0468	10.7125	13.691	9.8009	11.7444	11.0566	13.4468	10.3565	5.64386	7.10852	13.4179	11.9181	10.8502	9.09011	13.5752	11.592	13.8572	10.1874	11.3443	7.16993	10.255	12.9746
CAPN9	-1.73509	7.17439	-3.49296	0.000530139	0.00198775	-0.980515	DOWN	6.42626	7.84549	4.70044	6.06609	9.05257	7.18982	7.67243	9.39446	6.71425	5.32193	5.04439	2	5.24793	11.8341	7.06609	4.85798	8.54303	6.40939	6.97728	5.64386	11.0768	5.64386	7.8392	10.2058	6.12928	5.49185	9.31061	8.16993	1	5.55459	3.80735	4.32193	5.45943	4	9.29462	7.59991	11.3332	6.64386	9.23122	4.70044	10.42	8.20945
CARD11	1.35948	10.1438	4.54196	7.35558e-06	4.19385e-05	3.04239	UP	11.9155	12.1532	9.44294	12.014	12.1643	13.3422	13.4185	7.14975	11.3032	6.42626	11.3219	7.49185	12.1405	11.0768	9.57554	7.63662	10.978	11.4615	10.2095	6.22882	7.71425	11.0437	10.1111	14.1456	7.30378	11.5338	11.4625	8.42626	9.41996	13.1969	10.7039	10.3432	11.1183	8.01681	8.29921	10.1886	10.4979	10.3902	11.5382	9.03067	11.4783	11.9181
CARD14	1.5557	8.09563	5.01596	7.89972e-07	6.09336e-06	5.17172	UP	4.32193	7.24793	7.40939	9.48382	9.70217	10.1085	7.67948	9.14975	8.89178	8.07146	6.6865	8.97154	5.42626	8.83289	7.73471	8.20457	9.79442	7.69349	7.73471	8.95128	7.14975	7.45943	10.6202	6.52356	9.39232	10.1536	7.14975	7.85175	7.42626	8.55075	9.36632	8.90388	6.33985	9.65821	9.33316	6.45943	10.3718	9.41363	8.98014	5.83289	8.02791	9.40727
CARNS1	-1.0752	7.21697	-4.11916	4.60877e-05	0.000222069	1.30451	DOWN	4.58496	5.42626	5.24793	6.97728	8.93369	6.83289	10.224	10.1561	6.58496	4.08746	7.29462	5.32193	6.6865	7.17991	8.8009	4.70044	7.83289	5.75489	6.33985	6.37504	9.36194	8.04985	4.9542	8.66888	8.15482	8.42626	3.80735	6.02237	5.24793	6.84549	8.03892	6.42626	5.75489	5.55459	5.32193	7.12928	11.5981	7.53138	7.05528	6.20945	8.49586	6.94251
CARTPT	-3.45483	3.20081	-6.12763	2.10927e-09	2.7844e-08	10.881	DOWN	1	8.72792	4.52356	6.12928	1	4	2.32193	2.32193	4.45943	1.58496	0	9.25267	1	4.90689	11.4863	1	5.04439	1	2.58496	1	1	7.02237	4.45943	1	1.58496	3	0	0	0	6.75489	5.78136	0	1.58496	4.80735	1.58496	9.7211	3.45943	5.39232	7.96	7.40939	1.58496	1.58496
CASC20	1.16078	2.05099	3.11047	0.00199955	0.00645166	-2.20197	UP	1	4.80735	0	5.85798	5.32193	7.27612	4	0	5.93074	0	1.58496	1.58496	0	1	1.58496	4.52356	6.42626	6.67243	4.16993	0	1	6.10852	0	5.70044	0	5.70044	1.58496	0	1	2.32193	2	1	1.58496	0	4.24793	0	1.58496	8.12412	2.80735	2.80735	3.32193	2
CASC8	1.97261	5.96194	6.00483	4.25049e-09	5.30907e-08	10.2029	UP	5.70044	3.16993	4.24793	4	5.78136	8.7039	7.39232	8.61471	6.2854	7.12928	5.12928	6.33985	6.42626	5.2854	4.90689	7.2384	7.44294	5.88264	6.35755	5.39232	7.71425	6.08746	7.80735	4.45943	5.90689	7.05528	7.18982	7.04439	5.90689	7.69349	5.12928	5.58496	6.04439	6.75489	6.6865	5.2854	6.72792	8.59246	7.03342	3.32193	3	6.82018
CASC9	3.07123	6.50787	5.72846	1.97443e-08	2.16016e-07	8.71907	UP	6.59991	8.97728	1	7.47573	9.25267	11.96	3.58496	7.40939	8.85175	8.43463	6.87036	2	8.61839	9.23122	5.2854	0	3.16993	8.89785	1	7.20945	8.06609	9.96578	1	8.75489	9.21432	7.29462	10.0348	6.89482	6.98868	6.22882	9.95128	7.59246	7.91289	9.39446	8.55459	6.39232	4.08746	10.7838	7.25739	5.64386	8.26679	6.10852
CASP12	-1.15125	3.60382	-5.10734	5.03245e-07	4.06455e-06	5.60375	DOWN	2.32193	1	3.16993	4	1.58496	4	7.25739	3.32193	4.08746	0	3.80735	3.32193	2.32193	3.80735	6.91886	3.32193	5.20945	1.58496	3.80735	2.32193	3	4.45943	3	4.24793	3	2.32193	2.32193	3.70044	3.80735	4.58496	4.70044	3	3	5.08746	2.58496	5.90689	3.70044	4.70044	3.32193	5.42626	3.70044	2.80735
CASP5	1.13241	5.50204	2.7568	0.00610002	0.0171563	-3.21108	UP	5.78136	5.08746	5.39232	5.04439	4.58496	7.56224	5.16993	2.32193	5.45943	4.70044	6.32193	7.62205	4.52356	7.45121	2.80735	8.77479	3.70044	5.90689	6.98868	7.56224	2.32193	5.2854	5.97728	4.45943	11.1542	4	3.32193	2.32193	6.98868	6.65821	4.45943	8.60733	4.64386	5	6.24793	2.80735	6.26679	5.42626	7.08746	5.24793	5.32193	6.26679
CASQ1	-1.40931	3.82465	-4.1841	3.51044e-05	0.000173735	1.56137	DOWN	1.58496	2.58496	3.58496	4.90689	2.58496	3	6.75489	2.80735	4.52356	1	4.70044	4.24793	2	2.58496	9.62571	3.45943	4.90689	1.58496	3.16993	1.58496	2.32193	4.45943	1	4.16993	3.70044	4.39232	2.32193	2.32193	2	5.20945	3.90689	4.24793	3	4.39232	3	8.97441	3.70044	5.88264	4.80735	8.14975	4.24793	4.08746
CASQ2	-3.60641	6.55154	-8.17349	3.84506e-15	1.6279e-13	23.7507	DOWN	5.04439	8.23362	7.02237	5.88264	2	6.45943	7.05528	4.39232	7.14975	3	7.82655	10.5784	4.58496	6.98868	10.8041	4.45943	7.26679	1	3	1.58496	5.70044	9.58496	4.39232	5.78136	3.90689	2.32193	5.97728	5.83289	1	10.0688	9.44708	4.39232	8.224	9.37721	5.32193	14.1154	4.24793	5.72792	9.22882	10.6537	5.9542	5.52356
CASR	-1.56346	2.65954	-4.289	2.24475e-05	0.000115634	1.98404	DOWN	2.32193	3.80735	2.32193	3.90689	2.58496	3.45943	3.58496	3.58496	0	0	1.58496	0	1.58496	7.27612	2	2	5.2854	2	3.32193	1.58496	3.16993	3.70044	5.04439	1	2.32193	5.64386	1.58496	5.16993	2.58496	2	1.58496	2.80735	2.32193	2.32193	3.16993	4.39232	5.49185	5.80735	3.80735	3.58496	0	3.45943
CATSPERB	1.93513	7.29661	6.14443	1.91486e-09	2.55644e-08	10.9746	UP	6.70044	4.85798	5.70044	7.59991	7.6865	8.06609	8.28077	8.49586	8.93958	6.78136	5.39232	5.67243	9.04166	9.15482	6.04439	8.87958	7.94251	7.8009	6.49185	8.31288	7.04439	8.47168	8.72451	6.20945	8.87036	8.93074	5.24793	5.32193	6.50779	5.61471	7.88264	8.23362	6.2854	8.57365	9.7211	5.85798	11.8903	8.33985	7.46761	5.35755	9.77314	8.62571
CAV1	-1.27789	11.9425	-5.49348	6.96235e-08	6.82907e-07	7.50426	DOWN	10.1861	11.4661	10.403	12.5433	9.67066	12.3842	12.3551	9.64024	12.4278	10.7074	12.031	12.9012	13.3344	12.3115	15.6614	10.9801	11.1447	10.9418	9.87652	10.5981	10.8619	10.7082	11.0921	9.98014	11.0674	10.9751	9.90539	11.2354	11.4919	12.5421	12.6669	10.783	11.8309	12.6055	12.6493	15.4583	10.9837	10.3197	11.9296	13.1315	13.3667	11.4025
CAVIN2	-1.8521	9.83307	-7.04414	8.02059e-12	1.74773e-10	16.292	DOWN	7.82655	9.11374	8.15482	9.6865	6.49185	10.7004	11.2668	8.53916	10.1886	8.01123	10.9491	10.623	7.90087	10.6917	13.1846	7.50779	10.6555	7.60733	6.6865	7.98299	9.64205	9.11374	8.12928	9.54303	8.33092	9.56605	8.32193	8.37504	7.40088	10.9823	10.1599	7.90689	9.15228	10.3197	10.6165	12.7846	9.91737	7.54689	10.0674	11.2456	10.7423	9.3966
CBFA2T3	-1.32305	8.31208	-5.41419	1.05503e-07	9.90427e-07	7.10423	DOWN	6.53916	9.82337	7.66534	8.58871	4.9542	7.7211	12.0437	6.75489	7.87036	6.04439	10.7237	6.33985	7.65105	10.2842	9.63844	5.52356	9.88111	6.56986	7.70736	6.53916	7.14975	6.14975	7.09803	11.8301	6.83289	6.61471	6.32193	7.7211	6.56986	8.27146	8.92184	8.85175	7.40939	9.87498	7.82018	9.65821	8.7039	5.80735	7.40939	8.67948	10.792	9.00562
CBLC	1.26896	11.3387	5.26876	2.23278e-07	1.94962e-06	6.38358	UP	12.6808	11.4362	11.2627	11.9611	11.207	12.6253	11.3576	9.52748	12.0434	11.8868	11.2761	11.905	11.1013	12.0627	8.94837	10.9593	11.6366	13.5147	11.7022	11.007	11.6371	11.6861	14.3509	11.5241	12.5889	11.9054	12.8742	10.3869	12.0671	12.4528	13.0357	12.3041	11.5003	11.1408	11.8626	9.88722	12.0684	11.9502	12.3767	9.03067	10.5546	11.5575
CBLIF	-4.13706	5.71306	-5.64327	3.13308e-08	3.29979e-07	8.27367	DOWN	3.80735	10.5575	4.16993	6.04439	0	7.80735	3.16993	9.87958	3.80735	0	2.32193	2.32193	7.17991	11.5618	2	7.46761	12.8234	6.59991	5.78136	3	2	6.39232	5.42626	7.67243	6.44294	10.0251	0	12.1257	0	10.4231	6	4.70044	7.40088	3.58496	4.58496	3	5.58496	7.99435	7.5157	2.32193	13.7793	2.32193
CBLN1	-1.72851	3.62732	-4.15849	3.90999e-05	0.000191454	1.45961	DOWN	1	5.45943	0	6.85798	4.24793	1	5.45943	1.58496	1	2.32193	5.83289	3	2.58496	4.24793	8.67948	5.12928	4.16993	0	4.75489	1	2	1.58496	2	6.32193	2	4.58496	1.58496	3.32193	7.03342	4.70044	5	1.58496	2.80735	6.85798	3	4.58496	2.58496	3.58496	5.67243	2.58496	6.37504	3.45943
CBR1	-1.68097	11.1292	-9.79766	1.73233e-20	1.98369e-18	35.8125	DOWN	10.5304	10.8603	9.76653	10.7082	10.6402	12.2378	10.5498	10.0293	10.3061	11.8471	11.5216	11.8521	10.2992	11.5353	11.1624	10.5622	10.1319	11.1624	11.1085	6.32193	9.79766	10.4615	10.703	10.2621	12.1475	9.99294	11.3191	10.1548	12.8903	11.7056	12.0921	12.3006	11.2544	11.4388	12.0788	10.7347	11.2527	11.0815	11.4589	10.1935	10.0112	11.137
CBWD6	1.05756	6.95556	6.07241	2.89456e-09	3.73013e-08	10.5747	UP	6.45943	5.35755	5.61471	7.12928	7.18982	7.6865	8.10329	5.88264	7.76818	5.93074	6.30378	7.52356	8	7.2384	6.84549	7.15987	7.59246	5.90689	6.78136	6.61471	7.06609	8.77808	7.66534	7.79442	7.7879	7.3837	7.04439	5.75489	6.93074	6.14975	7.53916	8.20457	7.35755	7.70736	8.09803	7.04439	8.2854	9.17243	6.08746	6.20945	7.57743	7.55459
CBX2	2.26191	8.73751	7.69849	1.0569e-13	3.2997e-12	20.5129	UP	10.3174	8.91886	7.53138	11.8681	7.40939	10.8796	8.31741	4	10.585	10.8041	9.65642	8.24793	9.40514	9.25974	8.06609	8.7211	9.23601	7.96578	10.8796	11.4362	5.72792	6.76818	9.75489	11.2586	9.79604	10.5362	9.14211	6.20945	7.30378	10.4988	8.82337	8.51175	8.21432	11.0526	7.98299	6.9542	10.0715	8.86109	8.49586	7.01123	9.9263	6.79442
CBX7	-1.64559	10.5311	-9.15479	2.68456e-18	2.07934e-16	30.866	DOWN	8.72792	10.4105	9.73132	10.2958	11.3614	10.1046	12.4691	6.94251	10.6564	9.96867	11.0098	10.7936	10.4157	11.7507	13.0951	9.90989	11.0042	8.74483	8.71081	10.6027	9.32643	10.7465	10.3106	9.88417	9.90539	9.19722	9.84706	8.96867	10.3619	11.2697	11.1805	10.4136	10.0821	10.8556	9.69	13.2755	10.314	8.84549	10.7756	11.4466	10.352	10.3072
CBY2	1.8808	2.58062	4.54095	7.38923e-06	4.20967e-05	3.03805	UP	1.58496	5.49185	0	4.80735	5.75489	7.69349	2.32193	1	4.45943	0	0	1	0	5.12928	0	0	2	3.45943	1.58496	1	1.58496	6.14975	1	7.6865	2.80735	1	6.93074	3.80735	0	1	5.83289	0	7	2.80735	2	1	0	4.85798	3	2.58496	1	4.85798
CC2D2A	-1.05625	9.26954	-6.10211	2.4422e-09	3.19057e-08	10.7391	DOWN	8.44294	9.3015	8.51175	10.1935	9.12928	10.3837	9.85175	6.79442	10.1712	8.45121	8.37504	9.69523	9.04166	9.55459	11.6316	9.42417	8.57743	9.27612	9.75154	6.96578	8.41363	9.3966	7.93664	8.48382	8.224	9.15987	6.96578	8.51175	7.22882	10.1762	10.007	7.65821	8.9629	10.2866	8.21432	11.9114	9.86419	9.41151	8.87036	9.4818	10.1202	8.96
CCBE1	-1.35995	5.93209	-5.09261	5.4144e-07	4.33835e-06	5.53362	DOWN	4.85798	7.69349	5.52356	6.93074	4.70044	5.12928	9.15987	6.14975	5.35755	7.88264	5.67243	5.72792	5.52356	5.67243	7.84549	4	6.84549	6.44294	5.45943	4.32193	3.90689	6.10852	5.52356	7.21917	4.85798	10.6339	2.32193	3.32193	7.93074	6.2854	6.74147	6.08746	6.12928	7.83289	4.9542	5.08746	4.52356	7.03342	4.58496	4.90689	11.0286	5.70044
CCDC106	-1.16995	9.00681	-5.58872	4.19877e-08	4.32083e-07	7.99143	DOWN	8.18488	9.91289	8.7211	9.59991	9.32867	11.6248	9.98442	8.26209	8.08215	6.61471	9.97441	8.59991	8.03342	9.24555	10.6008	6.84549	8.89178	6.37504	8.25739	6.44294	9.44708	8.2854	7.70736	9.56986	7.33092	11.1053	6.84549	7.98868	7.92481	10.3663	9.17243	8.15987	10.032	8.7879	9.31061	10.8234	8.11894	8.30834	10.0265	8.74819	9.33985	8.35755
CCDC107	-1.36808	8.87852	-8.27577	1.85014e-15	8.52011e-14	24.4661	DOWN	8.69349	9.74315	7.90087	8.54689	8.73471	8.66888	8.74819	8.99152	8.55075	8.81698	8.85798	8.56224	8.96	9.17991	10.6856	6.75489	8.43879	9.71425	8.50383	7.93074	8.45533	8.74819	9.02514	8.07682	9.35535	8.45121	9.21917	7.48382	8.63662	9.54496	10.0661	8.83605	9.82814	7.80735	8.82018	10.9823	9.33316	6.91886	9.36413	9.23601	8.82972	8.98014
CCDC110	-1.32132	5.50498	-5.19597	3.22931e-07	2.72091e-06	6.02928	DOWN	3.16993	6.56986	2	6.35755	6.90689	5.55459	6.18982	4.24793	5.42626	4.24793	4.80735	5.88264	6.02237	7.94251	7.31288	5.24793	5.80735	3.58496	5.88264	6.61471	4.9542	5.2854	9.47573	4.70044	3.32193	4.64386	3	3.90689	2.58496	4.16993	7.27612	4.24793	4.24793	5.2854	3.80735	6.84549	5.45943	5.78136	5.16993	5.42626	6.18982	4.52356
CCDC138	1.1624	8.49316	7.48665	4.42614e-13	1.23195e-11	19.1153	UP	8.33092	7.35755	7.10852	9.36413	9.7211	9.48985	9.14466	8.03342	9.8933	8.92184	7.34873	8.50383	8.83289	9.40939	7.76818	8.81698	8.62571	8.03342	9.28309	9.32418	7.45943	9.0954	10.236	9.97011	8.7211	9.18982	9.31288	6.61471	9.49386	8.14975	9.29232	9.19476	8.54303	8.2384	9.32643	7.41785	9.7039	10.4263	7.07682	6.59991	8.72451	8.40514
CCDC14	1.11678	10.9613	8.24016	2.3884e-15	1.06538e-13	24.2163	UP	10.0417	9.6865	10.1774	11.956	13.1662	13.0405	11.6869	10.2538	11.6101	9.92926	9.47573	11.0161	12.2195	11.5713	11.5906	11.8777	10.2119	10.0755	11.0451	10.9189	10.0967	11.9694	11.5454	11.9473	11.4878	11.1261	11.2808	9.63118	11.3945	10.9801	11.183	12.0818	8.77479	11.4993	10.9256	11.0654	12.3309	12.445	10.2691	9.93074	12.1026	11.2674
CCDC146	-1.07395	8.39986	-5.41629	1.04356e-07	9.81819e-07	7.11475	DOWN	7.65821	5.52356	8.12412	8.18982	8.67243	7.36632	9.49985	6.59991	7.9542	7.43463	7.33985	8.89785	9.04712	8.69	9.92481	9.11634	8.51175	5.93074	9.22159	8.88264	7.40939	8.54303	8.96	7.76155	7.67243	6.14975	8.00562	7.19967	7.56986	8.55842	8.63662	8.60733	6.94251	9.16993	7.39232	11.8568	9.35975	8.93664	8.09803	8.05528	9.01123	9.60363
CCDC150	2.27125	6.9586	10.4296	9.99967e-23	1.77723e-20	40.8735	UP	5.42626	6.61471	6.16993	7.76155	6.6865	9.29462	6.94251	5.97728	8.32643	6.08746	5.52356	6.98868	8	6.98868	6.62936	7.34873	7.98299	7.26679	8.43045	7.7879	6.71425	8.89482	8.82337	8.85175	7.29462	7.22882	6.88264	4.9542	7.93074	6.45943	8.25267	8.21432	5.42626	7.65821	7.53916	5.39232	8.66888	9.07948	5.12928	5.64386	8.65105	7.53138
CCDC160	-1.97268	3.1958	-6.0587	3.12998e-09	4.00178e-08	10.499	DOWN	0	1	4.32193	4	2	2.58496	4.64386	2.58496	1.58496	2.58496	1.58496	3.32193	3.45943	4.75489	2	2.80735	5.52356	2.58496	2	5.32193	3.32193	4.08746	0	0	2.80735	0	4.08746	3.70044	0	2.58496	3	1	3.90689	6.98868	3.45943	5.24793	6.44294	4.90689	3.80735	3.32193	2	3.32193
CCDC162P	1.99012	5.95299	6.03444	3.59354e-09	4.54002e-08	10.3654	UP	4.75489	7.31288	2.58496	4.85798	7.76818	8.71425	6.32193	6.67243	8.69	2.58496	5.70044	3	4.24793	7.41785	5.49185	8.56605	6.22882	6.18982	6.16993	8.20457	3.90689	9.96434	10.4737	7.40939	7.87652	8.28077	7.27612	2.80735	4.90689	4.24793	8.94251	4.64386	6.56986	5.97728	7.67948	7.21917	5.16993	8.07146	5.42626	7.45943	9.06878	8.01681
CCDC168	1.13183	3.24632	4.46015	1.0613e-05	5.85521e-05	2.69407	UP	3	3.70044	0	4.08746	3.32193	2	4.32193	1.58496	3	1	1	3.80735	4.39232	2.58496	2.80735	3.45943	6.83289	1	4.70044	5.42626	2	6.40939	4.45943	2.32193	3	1	2.32193	2.58496	2	2.32193	4	4.52356	4.39232	4.16993	4.70044	4	3.16993	7.92481	1.58496	5.78136	4.80735	3.45943
CCDC169	-1.57285	3.83064	-4.10202	4.9492e-05	0.000237034	1.23733	DOWN	1	4.80735	1	7.10852	9.26679	9.39874	2	2.58496	5	0	1	3.80735	2	4.58496	7.44294	3.45943	5.97728	6.79442	1.58496	1.58496	4.80735	6.30378	6.33985	2	0	4.90689	0	1.58496	0	4.08746	6.49185	2.32193	2	5.80735	3	7.3837	3.16993	6.26679	2.80735	6.04439	4.70044	1.58496
CCDC175	1.01923	1.86816	3.1773	0.00160002	0.00530138	-1.99822	UP	0	3.70044	0	5.08746	1	3.58496	3.70044	0	3.70044	0	2.32193	3	0	3.70044	2.80735	6.37504	5.64386	3.80735	6.39232	2.58496	1.58496	5.20945	0	2.80735	3.58496	1	0	1	0	5.20945	3	4.85798	0	0	3.70044	4.52356	1	6.96578	2	4.58496	3	0
CCDC178	-1.83614	3.46936	-6.67576	8.08734e-11	1.45786e-09	14.0444	DOWN	0	4.80735	1	3.80735	1.58496	4.58496	6.06609	2	2.80735	2.32193	5.32193	4.52356	2.32193	3.80735	6.30378	2	5.97728	1	4.24793	1	2.80735	3.70044	2.80735	2.80735	0	1	0	4	0	3.70044	4.9542	1.58496	2	5.08746	4.08746	4.80735	3.90689	7.2854	2.32193	4.16993	2.80735	3.32193
CCDC18	1.08196	8.42132	7.46814	5.00908e-13	1.38181e-11	18.9946	UP	7.58496	7.63662	7.93074	9.58871	9.08215	10.0835	9.74987	6.42626	8.93664	7.13955	7.97154	8.56605	9.15482	8.90388	8.8009	8.98868	8.79442	7.55459	8.96578	8.80735	6.75489	9.50581	8.48784	8.93664	8.61839	7.98868	8.09803	7.27612	9.05799	8.35755	8.65821	9.77479	7.7879	8.48382	8.80413	7.96	9.03342	9.66	7.44294	7.20945	8.67243	8.75489
CCDC187	1.36872	4.63289	3.50685	0.000503992	0.0019025	-0.933635	UP	3.32193	9.92035	2.80735	7.56986	7.41785	3.45943	5.52356	4.9542	1.58496	3.58496	3.45943	3	8.00562	5.67243	2	2.58496	5.52356	1	4.64386	7.10852	5.70044	5.04439	6.90689	10.8424	6.53916	7.96	5.78136	3.16993	7.21917	3.45943	2.80735	7.70736	5.42626	4.9542	4.24793	1.58496	8.14466	5.97728	5.88264	3.45943	4.16993	3.32193
CCDC194	1.15133	2.45252	4.4098	1.32631e-05	7.1874e-05	2.48255	UP	3.58496	2	2	3.32193	0	1	5.08746	5.88264	3.32193	0	2	2.58496	2.80735	1.58496	3.32193	4.80735	4.39232	3	2	3	2.32193	4.70044	2.58496	2.80735	1	0	2.80735	2.32193	3	2.32193	4.08746	2.58496	1.58496	0	2.80735	3	3	5.70044	3	1	1	4.08746
CCDC198	2.62345	5.08519	4.94505	1.11578e-06	8.31512e-06	4.84122	UP	7.45943	2.58496	8.94544	8.54303	2.32193	5.85798	10.0674	5.9542	4.58496	2	1	0	2.32193	1.58496	4.90689	2.32193	6.56986	10.128	7.86419	1	5.61471	6	8.10852	7.2384	2	7.01123	1	7.86419	1	7.13955	4.58496	1	5.72792	10.4767	4.45943	6.90689	5.39232	8.36194	8.15482	4.9542	2.58496	4
CCDC34	1.13635	10.0865	6.77968	4.25423e-11	8.1374e-10	14.6687	UP	9.5812	9.19476	9.67596	10.8765	9.67596	11.8277	10.2264	7.45121	11.0795	9.7879	9.69174	11.3712	9.16993	10.3083	10.944	9.86419	11.1892	10.1241	11.6546	10.1497	8.25739	10.6519	9.26209	11.2992	11.1007	10.567	10.1228	7.82018	11.7317	9.91886	10.5584	11.3608	10.7665	9.19476	10.7805	9.91886	10.2808	11.3966	11.6022	8.11374	8.59619	10.3729
CCDC69	-2.12568	11.0138	-8.95774	1.20625e-17	8.31557e-16	29.3934	DOWN	9.80896	10.9549	10.3619	11.5382	11.1743	11.2738	12.7112	7.70736	11.2831	8.99718	12.1662	12.1023	10.2621	12.1805	14.5031	8.84549	11.1997	8.91588	8.69697	7.6865	9.19722	10.4747	9.23601	9.99718	9.29462	9.90087	8.7211	9.224	10.3197	11.8194	10.9091	10.8009	10.3399	10.9106	9.92481	14.2195	10.7773	9.25267	11.4666	12.4372	11.5314	11.3864
CCDC73	1.11314	4.96882	5.21703	2.90357e-07	2.47579e-06	6.13133	UP	3.58496	3.16993	4.45943	5.58496	4.39232	6.12928	5.04439	5.24793	5.52356	4	2.80735	6.06609	5.64386	4.58496	5.42626	4.45943	7.24793	5.32193	6.40939	4.75489	4.85798	6.26679	4.75489	4.9542	5.12928	5.83289	5.2854	7.21917	3.58496	3	5.75489	6.2854	4.80735	4.58496	5.32193	4.80735	5.67243	7.8392	5.75489	5.80735	4.75489	5.80735
CCDC78	1.49514	6.24327	5.93489	6.30371e-09	7.62523e-08	9.82184	UP	6	5.24793	5.85798	7.49985	6.87036	7.31288	8.04439	5.20945	5.64386	5.45943	4.39232	6.59991	7.69349	7.01123	4.9542	6.47573	7.88264	4.85798	7.52356	7.92481	5.78136	5.88264	7	7.12928	7.36632	6.59991	5.52356	4.16993	6.37504	7.30378	7.58496	8.05528	6	8.3837	6.61471	5.80735	8.02237	6.52356	4.70044	3.80735	6.74147	6.30378
CCDC85A	-1.07693	4.89281	-3.90265	0.000111341	0.000492533	0.474936	DOWN	3.32193	5.64386	3.45943	4.9542	4.32193	5.67243	8.78463	2.58496	4.45943	3	5.97728	3.90689	3.45943	5.72792	6.12928	2.32193	5.52356	3.16993	3.80735	2	5.2854	3.70044	3.45943	6.24793	3	3.90689	1.58496	2.58496	3	6.20945	5.70044	4.08746	3.32193	7.34873	4.90689	6.59991	4.24793	4.58496	6.24793	4.45943	5.24793	5
CCDC9B	-1.03977	9.51662	-3.9373	9.69365e-05	0.000434787	0.604944	DOWN	9.64926	7.94837	7.44294	9.83605	11.5948	11.7507	11.388	6.97728	10.1774	6.76818	7.40939	10.363	9.92926	10.3253	13.097	6.37504	9.24079	6.10852	11.0217	9.43045	9.26444	9.08215	9.92481	10.1699	8.94837	5.83289	8.19967	8.01123	7.59246	9.82972	10	9.03617	8.60363	10.6528	8.91289	13.1209	8.06609	9.11374	9.83447	10.7887	10.0928	9.9629
CCK	-2.28378	4.84341	-4.67715	3.96565e-06	2.4017e-05	3.63041	DOWN	0	8.43045	4.16993	2.80735	9.82496	3.70044	6.79442	7.75489	5.12928	2	5.42626	1	7.10852	5.97728	1.58496	1.58496	3.70044	4.16993	2.80735	6.56986	4.75489	8.26679	10.1202	2.58496	4.32193	2.32193	7.62205	5.58496	1	3	6.14975	0	6.6865	6.22882	5.2854	7.02237	7.48382	4.45943	5.58496	1.58496	3.32193	5.2854
CCKAR	-3.22855	3.07518	-6.58007	1.45133e-10	2.44448e-09	13.4764	DOWN	0	2.58496	3.58496	6.40939	0	0	3.32193	4	4.85798	2.58496	0	5.85798	0	7.04439	11.0126	2.32193	5.61471	0	2.58496	0	0	4.39232	1.58496	1	0	2.80735	4.16993	4.75489	0	5.61471	3.45943	0	1.58496	4.16993	2.80735	7.32193	2.80735	5.88264	5.32193	8.8009	5.9542	0
CCKBR	-4.18754	4.1727	-8.35926	1.01359e-15	4.90609e-14	25.0548	DOWN	0	7.3837	1.58496	8.85175	4.08746	4.70044	4.45943	8.16993	2	2.58496	0	1	5.93074	9.20457	3	2	8.80735	9.17991	2.58496	0	4.58496	5	1	7.16993	1	8.04985	1.58496	6	1	7	3.45943	1	5.78136	2.58496	4.9542	6.59991	6.80735	7.56224	2.80735	1.58496	7.91289	2.80735
CCL11	-1.13829	8.89545	-3.34031	0.000914175	0.00322532	-1.48406	DOWN	8.21917	9.92778	9.21432	9.67948	4.75489	9.74651	6.08746	6.94251	10.5661	6.97728	11.1636	8.79116	7.98868	11.2871	10.8194	6.90689	9.20945	5.20945	8.01123	7.32193	7.15987	4.16993	5.58496	7.2854	8.24317	8.01123	8.18488	8.56605	6.70044	9.0954	7.55459	9.02514	8.12928	11.4924	9.33316	7.56224	8.76155	6.39232	7.04439	9.45943	12.8961	11.1643
CCL14	-1.90969	5.64388	-6.60606	1.23897e-10	2.12776e-09	13.63	DOWN	3.58496	5.88264	5.04439	6.24793	2.32193	6.78136	7.75489	3.70044	6.94251	3	7.2854	6.96578	3.16993	6.37504	6.72792	5.42626	5.64386	5.04439	4.52356	4.45943	5.61471	3.90689	5.70044	6.22882	4.08746	4	5.08746	7.20945	3	4.70044	6.59991	5.35755	5.90689	7	2.32193	8.13955	1	6.76818	5.52356	5.70044	7.40939	6.53916
CCL15	2.45258	7.25454	6.02323	3.82976e-09	4.81706e-08	10.3038	UP	9.68825	8.7211	8.90989	8.37504	5.39232	9.55459	8.59991	3.45943	9.62571	6.26679	9.16491	9.1267	2.32193	9.43045	6.53916	9.88417	7.85798	9.91289	8.37069	9.19229	6.16993	7.56986	8.67948	8.75154	10.4676	6.74147	9.16993	4.80735	5.58496	7.34873	3.45943	9.17742	6.32193	4.90689	7.41785	8.31288	5.78136	9.74819	7.93664	7.13955	8	7.49985
CCL18	1.40907	9.64264	3.49603	0.000524258	0.00196721	-0.970178	UP	12.2204	10.9672	12.4704	13.0845	7.3837	10.7789	8.9571	6.94251	11.1972	7.12928	10.8619	12.0179	9.62388	11.9084	12.4765	7.35755	8.20945	8.91588	8.70736	9.03342	9.42626	11.8273	9.44087	8.12928	10.5915	12.8096	7.04439	8.8392	14.2008	9.96578	7.19967	11.956	8.31741	11.3907	8.9571	6.71425	9.01402	5.45943	8.03342	4.75489	11.1293	10.2252
CCL20	1.88595	10.1973	4.2074	3.18112e-05	0.000158958	1.6544	UP	10.3619	8.50383	10.2155	12.3326	12.9665	12.118	10.8098	11.7793	11.6142	7.8009	6.83289	8.91886	7.56224	11.1261	8.85175	11.1357	10.2228	13.0548	8.42626	8.7879	8.99152	11.5421	9.44294	7.9542	13.938	12.7869	11.1523	7.17991	10.3287	11.0396	7.62205	11.5589	8.9542	11.2703	8.59619	7.24793	9.45121	12.0362	12.2009	8.34873	11.6497	10.9679
CCL21	-2.53088	10.0116	-5.8459	1.03526e-08	1.20201e-07	9.34244	DOWN	9.46557	9.71425	9.71081	11.2668	9.19722	10.1331	17.3111	8.5157	8.77149	8.50383	14.09	10.8603	11.5565	13.2011	12.1344	6.42626	11.736	1	8.79116	4.08746	10.1007	7.94837	9.40514	10.1033	8.43045	9.77643	3.45943	11.4194	2.32193	12.7928	11.6032	9.42206	11.7134	11.3123	9.70217	12.8172	9.03067	7.40939	9.5157	10.8098	8.07682	10.0941
CCL23	-1.53856	4.26372	-4.98652	9.12202e-07	6.93119e-06	5.03399	DOWN	3	5.93074	4.45943	5.32193	1.58496	5.35755	8.21432	2.32193	4.70044	1	6.61471	4.32193	3	5.39232	6.47573	5.55459	3.45943	8.12412	2	3.16993	4.90689	3.70044	4.16993	3.90689	3.70044	5.67243	5.20945	4.58496	5.35755	3	3.58496	4.45943	1.58496	5.08746	3.32193	4.39232	3.16993	3.90689	3	3.70044	6.06609	3.90689
CCL28	-1.01351	10.0325	-2.94713	0.00339218	0.0102692	-2.68251	DOWN	6.94251	10.0084	8.79766	8.14466	10.4367	12.7561	9.9263	10.9106	9.52943	11.9618	9.73978	9.75656	8.65105	12.556	7.98299	10.7039	12.4896	10.6856	8.14466	10.7871	10.983	9.31515	10.5746	7.09803	13.0802	8.48382	9.49985	8.98299	9.5411	9.5812	13.6137	12.0593	11.3197	9.77972	12.0901	7.85798	11.4645	10.2586	10.3208	6.75489	10.6511	10.8619
CCL3	2.06275	7.29009	6.92547	1.70588e-11	3.50672e-10	15.5575	UP	9.74819	7.94837	8.85798	9.57743	4.85798	7.87652	6.2854	4	8.09803	6.04439	7.31288	7.13955	7.62205	7.91289	8.224	6.61471	6.04439	5.80735	6.42626	6.12928	4.52356	8.18488	6.2854	5.90689	7.31288	8.08746	6.30378	5.64386	11.0112	8.40939	7.46761	8.59246	6.67243	10.1497	5.04439	5.49185	7.9542	6.18982	6.96578	4.45943	11.5627	8.99435
CCL3L1	1.62825	6.51452	4.83325	1.90751e-06	1.34794e-05	4.32863	UP	8.24793	7.42626	6.40939	8.69697	5	8.26679	6.18982	4	6.26679	4.52356	7.20945	5.42626	5.2854	8.85487	7.25739	5.39232	5.42626	5.85798	5	5.24793	3.45943	7.74819	5.39232	6.37504	6.72792	7.2384	6.32193	5.49185	10.6202	7.31288	7.87036	6.18982	5.64386	9.74651	5.88264	5.35755	8.2854	7.40088	5.85798	4.45943	10.0126	0
CCL4L2	1.29224	7.7956	3.87144	0.000126024	0.000551763	0.358789	UP	9.38154	7.53916	7.71425	9.77643	5.58496	9.17991	7.08746	4.52356	7.27612	6.14975	8.01123	7.14975	7.41785	9.88417	7.74819	6.33985	6.32193	8.03892	5.55459	6.2854	5.49185	8.27612	7.33092	6.70044	7.94837	9.40514	8.27146	7.21917	11.2003	8.67243	8.5812	8.48382	6.91886	9.97154	7.62205	6.9542	9.61102	6.53916	6.02237	6.02237	10.7557	0
CCL7	2.57403	3.41311	6.4162	3.89198e-10	6.05884e-09	12.5189	UP	6.2854	6.58496	3.58496	4.75489	1.58496	4	1.58496	1	6.44294	0	1.58496	6.32193	4.45943	4.24793	4.24793	1.58496	3.32193	1	2.58496	3.90689	0	2.80735	3.16993	1	4.08746	6.08746	2.58496	0	6.55459	4.24793	0	3.58496	4.85798	7.62205	1.58496	2.80735	3.16993	3	6.14975	1	7.48382	4.90689
CCN4	2.00267	8.77597	7.52773	3.36038e-13	9.66046e-12	19.384	UP	7.9542	9.92184	9.40514	11.3038	6.89482	9.24793	9.96	4.39232	9.7364	7.24793	7.16993	9.25739	10.1111	10.3231	10.9787	8.58496	9.22882	6.20945	8.10852	7.83289	6.04439	7.01123	9.39874	8.43463	9.46352	7.85798	6.94251	5.04439	10.6073	10.5859	9.78627	9.65284	8.0607	11.3443	8.57743	10.1059	8.12412	6.65821	8.67596	8.42626	13.6159	9.56415
CCN5	-3.89908	5.75547	-11.5399	7.65897e-27	3.48473e-24	50.1876	DOWN	3.45943	6.24793	3.90689	6.75489	5.55459	9.14211	6.70044	4.08746	7.56986	5.35755	7.10852	5.90689	6.82018	6.72792	8.28077	4.39232	7.26679	0	4.16993	4.39232	6.91886	7.01123	7.96578	7.93664	3.16993	0	2.32193	5.32193	1.58496	7.44294	9.21675	4.70044	6.74147	5.32193	4	8.91886	6.30378	7.64386	3.45943	3.90689	5.2854	4.9542
CCNA1	-1.68893	2.70182	-6.23892	1.10712e-09	1.56307e-08	11.5053	DOWN	0	3	0	5.72792	1	3	4.16993	2.58496	1.58496	0	2.32193	4.64386	2.32193	3.58496	5.39232	1	4.52356	0	0	0	3.70044	2.80735	1.58496	3.80735	0	4.24793	5.32193	3.16993	1	3	2.32193	2	1	6.98868	1	4.24793	1.58496	4.64386	3.16993	3.45943	3	2
CCNA2	1.866	10.9803	9.13438	3.13977e-18	2.41644e-16	30.7124	UP	11.7859	11.6724	10.9527	12.0805	11.4737	12.2946	10.332	8.22882	11.7578	12.3365	10.4073	12.0265	11.6604	12.0908	9.57365	11.6733	10.4707	11.3955	12.6237	12.9009	9.99152	10.3185	11.5387	11.9421	12.6216	12.0137	11.2615	9.55075	13.3357	11.7035	11.3756	12.3663	11.6216	11.9118	11.7549	8.46761	12.6122	10.1972	10.2046	8.42626	10.5897	11.4848
CCNB1	1.78001	11.241	9.40019	4.01476e-19	3.54922e-17	32.729	UP	11.9509	11.896	10.6175	12.0498	11.3945	12.8613	10.2467	8.55075	12.4189	12.4486	10.6402	12.2336	11.9751	12.1504	9.83289	11.8333	10.5622	11.3761	12.6566	12.9897	9.56605	11.3168	11.3729	11.8162	12.8315	11.5191	12.4123	9.24317	13.0012	12.1302	11.4661	13.0184	12.1727	11.6353	12.5618	8.69	12.4349	11.0098	11.2426	8.61839	10.5699	11.0987
CCNB2	1.85871	10.7754	9.93628	5.68308e-21	7.10364e-19	36.9064	UP	11.1718	11.1189	10.6917	11.2076	10.6987	12.2113	10.1523	8.48784	11.7013	11.9281	10.314	11.8138	11.7271	11.6711	9.26444	11.1319	10.5459	11.8273	12.2506	12.3387	9.13443	10.8757	11.6188	12.4325	12.2989	11.8482	11.5713	9.12412	12.48	11.1338	11.4252	12.2473	11.2456	11.3945	11.6917	8.77149	12.0539	10.567	10.3772	8.64386	10.774	10.8704
CCNE1	1.88113	9.22727	6.35512	5.59384e-10	8.43873e-09	12.1671	UP	7.30378	12.899	7.08746	9.80896	9.54303	13.0777	8.30834	7.05528	9.75322	9.42417	7.40939	9.27612	9.17243	10.0993	8.49985	9.22159	9.224	9.75822	10.3163	10.2866	9.09276	8.22882	9.46761	10.3365	9.88722	10.0126	8.87344	6.44294	10.3859	11.0875	9.15735	10.2021	8.23362	9.85331	9.61287	7.41785	9.94983	11.1241	9.41363	6.40939	8.48382	8.68299
CCNE2	1.23256	8.13037	6.92667	1.69291e-11	3.48635e-10	15.5649	UP	7.8392	9.50779	8.56986	8.43045	10.007	9.49386	7.7879	6.24793	9.81858	9.6987	7.31288	8.74147	8.87958	9.33092	7.17991	9.11634	7.89482	7.49985	8.82337	9.71253	7.02237	8.7211	8.47168	10.4553	9.87036	8.73132	8.25739	6.90689	10.2726	9.75656	7.74147	8.24317	6.56986	9.51175	8.83289	7.16993	9.25974	8.29462	6.88264	6.20945	8.59246	8.31741
CCNF	1.67419	10.4394	9.74513	2.63642e-20	2.89277e-18	35.4004	UP	10.888	12.4344	10.2715	11.8325	10.9001	11.6202	10.3231	7.26679	11.5632	11.8451	10.0715	10.4157	11.2992	11.544	9.34651	10.5878	10.4502	10.4263	11.3891	11.6861	8.49185	10.3923	11.3134	12.9593	11.1447	10.865	10.1824	8.49185	12.4941	11.4651	10.3531	11.5741	10.2609	10.983	11.8293	8.04439	12.057	9.67243	10.4019	8	10.352	11.0614
CCNI2	1.91347	8.38799	7.12689	4.71234e-12	1.0706e-10	16.8099	UP	3.16993	8.53528	3.90689	10.6202	8.50383	9.85953	7.76818	6.67243	8.57365	9.31515	8.70736	9.38154	9.14466	10.5943	6.97728	8.04439	8.87652	10.2644	10.5793	9.74147	7.93664	8.6865	7.45943	9.73302	10.5401	8.89482	8.98868	6.30378	10.7731	9.07948	7.96578	10.374	9.1267	9.69	9.08746	7	9.82337	9.0634	8.26209	6.64386	8.03892	9.41363
CCNO	1.43979	8.24611	4.87274	1.58016e-06	1.1371e-05	4.50851	UP	9.71425	7.39232	8.53528	9.43045	9.94983	10.4325	5	7.98299	9.36194	9.31515	8.42206	8.55075	8.61102	10.1408	5.93074	9.10591	9.94105	9.84392	9.20945	9.45943	7.99435	8.7211	8.21432	8.43045	9.73471	8.65105	9.51964	7.92481	9.76155	9.80574	9.29232	9.36632	8.633	8.30378	9.46352	5.75489	9.99577	7.90087	8.3837	6.16993	6.76818	9.5812
CCNP	2.14613	5.81427	5.52093	6.02239e-08	5.98451e-07	7.64393	UP	1.58496	8.26209	1.58496	7.14975	5.93074	5.9542	3.90689	5.58496	7.21917	5.2854	7.40939	5.70044	7.20945	9.44294	4	6.70044	3.45943	4.70044	7.18982	9.33762	5.75489	6.20945	6.30378	9.34873	9.97871	4.80735	6.32193	2.58496	8.40088	7.66534	8.38802	8.5812	7.24793	9.53138	7.19967	4.58496	7.59991	8.7039	6.70044	4.32193	4.08746	4.85798
CCR10	-1.3724	6.39662	-6.5913	1.35558e-10	2.30712e-09	13.5426	DOWN	5.58496	8.19476	6.20945	7.15987	5.78136	7.06609	6.80735	4.45943	5.93074	5.20945	5.9542	6.06609	6.30378	7.36632	8.72792	4.08746	6.37504	5.35755	5.52356	5.16993	5.55459	6.71425	5.39232	9.12412	5.20945	7.8392	2	4.08746	7.73471	6.32193	7.5157	5.12928	7.74819	5.93074	5.12928	8.50383	8.04985	4.45943	6.53916	5.64386	7.2854	6.71425
CCR8	2.3081	4.6855	8.21466	2.86632e-15	1.25237e-13	24.0379	UP	6.06609	4.64386	7	7.40088	1	6.14975	7.10852	1.58496	2.58496	3.70044	6.18982	3	6.04439	6.56986	3.58496	4.9542	6.44294	3.32193	2	3	3.70044	4.9542	3	4.24793	3.45943	6.45943	4.90689	0	7.03342	6.88264	5.49185	6.22882	3	5.20945	3.70044	5.2854	3.58496	4.80735	3.80735	4.16993	6.44294	5.9542
CCT6P2	1.2482	3.94808	6.38442	4.70194e-10	7.2112e-09	12.3355	UP	4.08746	3.70044	2.58496	4.58496	4.80735	4.64386	5	2	4.52356	4.58496	3	4.08746	3.80735	3.16993	3.58496	4.75489	5.75489	3.58496	4.45943	4.39232	3.45943	5.80735	3.32193	5.20945	4	4.52356	3.80735	3.45943	3	3.70044	4.9542	5.08746	3.80735	4.52356	2.80735	3.32193	5.04439	6.72792	4	3	3.90689	3.70044
CD177	1.26128	6.96037	2.56001	0.0108276	0.0281702	-3.72182	UP	7.27612	6.75489	2.32193	6.40939	9.55267	6.2854	6.79442	4.58496	5.08746	4	7.72792	4.9542	4.58496	14.5016	9.01959	5.55459	7.85798	8.74483	4.64386	7.45121	6.50779	5.61471	8.69697	6.33985	9.42417	8.77479	14.8218	1.58496	15.614	9.40939	5.55459	7.26679	6.53916	6.58496	6.89482	7.49985	7.01123	6.6865	11.1053	5.42626	7.09803	9.91886
CD1C	-1.32397	6.26282	-4.02316	6.84779e-05	0.000318054	0.931573	DOWN	5.20945	8.13443	7.04439	5.88264	2.58496	5.70044	10.3955	4.45943	4.08746	5.61471	10.0835	2.80735	4.70044	9.35975	8.22882	6.10852	8.3443	4.52356	2.80735	2.58496	5.67243	4.80735	3.80735	5.67243	4	6.56986	7.03342	6.42626	4.90689	7.03342	5.64386	6.67243	5.78136	5.88264	6.65821	7.30378	6.58496	4.80735	6.96578	7.59991	6.61471	7.14975
CD200R1L	1.04289	1.66998	3.6204	0.000331287	0.00130949	-0.543927	UP	0	1	0	3.90689	3	5.42626	1	2.80735	0	0	0	1	3.45943	3.45943	3	1	2	2.58496	2.32193	0	1.58496	5.04439	0	4.58496	3	0	0	3.32193	0	2.32193	6.22882	0	0	2.32193	4.16993	0	1.58496	5.64386	2.58496	3.32193	4.64386	0
CD24	1.22987	15.3991	4.25057	2.64709e-05	0.00013453	1.82809	UP	16.6239	16.0229	15.2036	14.4853	14.3083	15.286	14.9113	15.6697	16.4124	15.256	14.6347	15.6483	13.39	16.4246	14.0521	13.8676	15.6857	15.6417	16.6296	14.8374	14.6196	15.4946	16.2875	15.8411	16.0378	15.414	16.1907	15.049	6.98868	16.6258	18.0494	15.8176	17.2361	15.9842	17.4605	14.3454	17.659	13.744	13.6207	14.0222	13.8239	15.4225
CD300LF	1.42769	7.28251	6.30523	7.50811e-10	1.10386e-08	11.8817	UP	9.43671	8.83605	8.59619	8.79442	4.24793	7.89482	8.59991	4.64386	7.5157	5.90689	8.27612	6.90689	7.14975	8.63662	6.70044	6.64386	7.69349	5.83289	5.75489	5.55459	5.85798	8.47978	6.18982	5.24793	7.13955	7.93664	6.84549	4.90689	9.5411	8.33985	7.64386	8.49586	5.42626	7.42626	6.30378	6.40939	7.06609	7.22882	7.7879	5.61471	7.5157	9.09803
CD300LG	-2.71989	3.04358	-8.71545	7.43246e-17	4.44177e-15	27.6122	DOWN	2.58496	3.58496	1.58496	5.24793	1	2.80735	6.84549	1	3.16993	0	7.64386	2.58496	2.58496	4.16993	7.56986	2.58496	6.2854	0	2.32193	1	1	4.58496	1	2.58496	2.32193	1	1.58496	2	1.58496	3.70044	5.78136	1.58496	4.08746	1.58496	2.80735	3.58496	2.80735	6.97728	2.32193	4.39232	2.32193	2
CD36	-2.02222	9.55998	-8.08842	7.03176e-15	2.82629e-13	23.1605	DOWN	8.64024	11.1196	6.83289	9.29921	7.07682	9.64205	11.3929	6.89482	10.5372	7.50779	11.2324	8.77479	7.86419	9.80252	13.2497	7.65821	9.25974	6.18982	6.2854	8.16993	7.47573	7	7.96	9.09011	7.66534	8.86728	8.70044	7.7211	8.86419	9.86573	11.0728	7.55459	8.36194	10.4231	9.36194	9.90839	9.09011	7.6865	8.77149	9.12412	10.5527	9.53916
CD72	1.14516	7.66746	5.28976	2.00575e-07	1.77069e-06	6.48658	UP	8.58496	8.76818	7.92481	8.01681	8.40088	7.67948	11.1118	5.78136	7.34873	5.93074	10.6751	7.15987	8.51175	8.66178	7.2854	5.64386	9.09011	5.88264	6.06609	4.80735	6.74147	7.60733	7.56224	7.22882	6.52356	8.19967	6.76818	5.55459	9.14211	8.34873	8.62571	8.42206	7.13955	7.46761	6.9542	7.41785	8.51964	6.87036	8.20945	7.3837	8.39232	9.08215
CD79B	-1.04244	7.4391	-3.21096	0.00142806	0.00479305	-1.89406	DOWN	6.94251	7.78136	6.83289	7.6865	2.32193	7.12928	12.545	4.80735	5.97728	4.9542	12.9294	5.55459	7.76155	9.73471	8.17493	4.58496	9.79116	6.97728	5.20945	4.58496	7.02237	5.61471	5.16993	5.67243	5.83289	6.62936	6.24793	7.47573	6.89482	7.42626	8.28077	9.33316	7.94251	6.49185	6.72792	9.22159	8.85798	6.14975	7.49985	8.75489	6.35755	9.11114
CD80	1.89767	6.13135	7.85571	3.58428e-14	1.23172e-12	21.5689	UP	7.10852	6.40939	7.20945	7.67243	3.32193	6.47573	8.36194	2.80735	6.98868	4.58496	5.75489	6.59991	7.47573	7.85798	3.90689	6.75489	7.40088	4.24793	4.52356	3.80735	4	6.06609	4.64386	4.24793	5.75489	7.78136	5.97728	4	9.24317	7.29462	6.16993	7.62936	4.08746	7.34873	5.39232	5.58496	6.72792	6.30378	5.80735	5.24793	7.90689	7.37504
CD81-AS1	-1.00933	3.00542	-4.5827	6.11566e-06	3.54905e-05	3.21796	DOWN	1	3.58496	2.80735	4.24793	2.80735	4.32193	4.24793	1	3.45943	3	3.32193	3.32193	2.80735	2	5.12928	2.32193	4.39232	2	2.32193	2.32193	2	2.58496	2.80735	6.56986	1	2.32193	2.32193	2	3.90689	3.16993	4.75489	2.80735	1.58496	3.16993	2	4.58496	2.32193	3.80735	2	3.80735	5	2.80735
CDC20	2.12823	11.2724	9.10595	3.90364e-18	2.94935e-16	30.499	UP	12.3278	12.1833	10.7665	12.1427	11.6161	12.8607	10.0375	9.94105	11.2889	12.6334	11.2574	10.7657	11.7669	12.4497	9.35535	10.5971	10.7474	12.7381	12.4717	12.6917	10.7895	11.0512	12.0365	11.5784	12.8965	12.438	11.88	9.41785	12.9714	11.9883	12.1605	12.8242	12.6558	11.043	12.6854	8.28077	12.4091	11.0566	11.0119	8.7211	10.2491	11.2662
CDC25A	1.65268	8.96656	7.65215	1.44931e-13	4.41575e-12	20.2047	UP	9.55459	9.74315	9.39874	10.7423	10.2969	10.9484	7.7211	6.42626	9.81858	10.2808	8.93369	9.55842	9.35315	10.0512	7.5157	8.61839	8.96867	10.0471	11.0961	10.6865	7.78136	9	9.97154	10.7879	10.5275	9.76818	9.49185	6.90689	11.1649	9.60918	8.30378	10.6519	8.83605	8.33985	10.988	6.64386	10.8887	9.60918	9.09276	6.32193	8.49185	9.28077
CDC25B	1.3425	12.618	7.70583	1.00523e-13	3.1499e-12	20.5619	UP	13.1529	13.5155	12.8958	12.2834	14.8419	14.9717	13.0198	8.97154	13.5085	12.9317	11.9625	12.2726	12.3573	13.3278	12.0984	12.4949	13.2078	12.1049	13.7934	11.638	11.1046	12.9654	12.318	14.9767	12.9071	11.5579	12.5515	9.633	12.9611	13.5557	12.8564	13.3353	12.7593	12.3888	14.0097	11.4584	13.3071	12.3078	12.352	10.9151	13.1277	13.0818
CDC25C	2.05292	8.42893	9.35354	5.77567e-19	4.98959e-17	32.3723	UP	8.0607	9.60918	8.35315	9.30606	8.8009	9.96	7.94837	7.02237	9.73132	9.49785	8.43879	8.51175	8.06609	9.94544	6.70044	8.91289	8.61102	9.06609	9.52748	10.4062	6.62936	9.12153	9.45327	9.88417	9.74819	9.21189	9.61287	6.22882	10.1098	9.82337	8.51175	9.59805	9.09276	9.17742	8.8392	6.18982	9.52552	9.34207	8.40514	6.26679	8.61102	8.65821
CDC45	2.21894	9.30218	10.0935	1.58798e-21	2.16082e-19	38.1581	UP	9.92035	9.71939	9.35315	10.1737	11.1867	10.4315	8.12928	6.10852	9.86728	10.7228	8.40939	10.0674	9.77314	10.2288	7.63662	9.3966	9.47776	9.28309	10.5517	10.4625	8.53916	9.03892	10.3465	10.1935	10.4105	10.9542	9.96867	7.74819	11.2877	9.13955	8.91289	11.0855	9.3015	10.3004	10.1408	6.90689	10.7969	9.9263	9.82177	6.14975	8.93664	9.09011
CDC6	2.48932	10.4632	9.68752	4.17176e-20	4.42103e-18	34.9501	UP	10.363	10.4778	10.3443	11.233	12.1529	12.2339	9.1267	9.16491	11.7172	11.3636	9.29692	10.8486	10.2444	11.0954	8.53138	10.207	10.3718	10.6193	11.4747	11.5003	9.75822	10.6248	13.7738	10.5498	11.4372	11.0661	10.7805	9.06609	11.9661	10.7781	10.6312	11.2958	10.9607	11.8857	11.5196	6.78136	11.6555	10.7091	9.82496	6.44294	9.60363	9.94398
CDC7	1.75109	9.06708	10.4245	1.0437e-22	1.84534e-20	40.8314	UP	8.52748	9.16491	9.43045	10.5343	9.72451	10.8273	10.0471	6.58496	10.2456	9.43254	7.79442	9.77479	8.91289	9.67066	8.75489	9.82018	8.21432	8.63662	10.4717	10.1687	8.08215	9.26444	9.18239	10.8106	10.9651	10.6402	9.70736	7.70736	11.1059	9.49985	9.08215	9.7364	8.21432	9.01681	9.79766	7.36632	9.85019	9.03892	8.34873	7.18982	9.05528	9.39232
CDCA2	2.66106	9.28751	11.4159	2.26166e-26	8.97405e-24	49.1229	UP	9.68299	10.3761	8.51964	10.5488	9.85019	10.6339	8.69697	7.30378	11.6353	11.1886	8.98868	10.545	11.0914	10.8525	8.11894	10.4747	8.42206	9.90839	10.0928	11.1674	7.87036	9.05257	10.8065	9.67419	10.314	10.0471	9.34873	6.79442	12.6307	9.39017	10.218	11.2033	8.90689	8.55842	10.6475	6.79442	11.5845	8.92481	7.27612	6.62936	9.82018	9.39874
CDCA3	1.36186	10.0834	6.72015	6.15202e-11	1.14093e-09	14.3102	UP	10.6618	10.8719	9.41785	10.7863	10.0795	12.5201	9.12412	8.08746	10.7591	10.8463	10.0701	10.6777	9.97298	10.2046	8.45533	10.0126	9.72281	11.3778	10.9204	10.8463	8.74819	10.944	10.5048	10.8416	11.9762	11.0721	11.8037	8.13955	11.056	10.633	10.4346	11.3129	11.0492	10.2923	11.4605	8.01123	11.3151	10.8704	10.3332	8.71081	9.25739	10.5831
CDCA5	2.28363	10.2631	10.7359	7.70739e-24	1.76515e-21	43.3914	UP	10.7202	11.2046	10.0808	11.4969	11.2992	11.4909	9.15228	7.29462	11.4919	11.6371	9.94544	10.7202	10.5196	10.973	8.59619	10.058	10.4878	10.5294	11.4147	11.9614	9.18735	9.74819	11.1611	12.4294	11.4828	11.0175	10.1997	8.33985	12.3046	11.6488	10.4294	11.5565	10.1898	10.8202	11.5817	7.52356	11.7793	9.63662	9.79442	7.64386	9.81378	10.2738
CDCA7	1.96379	11.5065	8.36643	9.62353e-16	4.69805e-14	25.1055	UP	11.5425	10.6466	11.5216	13.0175	13.4905	11.9607	11.0492	7.62205	13.5669	11.5755	11.3939	12.2943	10.8986	12.6983	9.05528	12.5083	11.6551	12.6073	13.641	13.6125	9.1472	12.329	12.9905	12.4291	13.4508	10.1176	13.2066	9.68825	13.4504	10.7557	10.5157	12.5807	12.1935	11.2912	10.9651	10.6384	12.543	11.2597	10.7482	10.5527	9.75989	11.7932
CDCA8	2.09394	10.5571	10.4057	1.22e-22	2.11944e-20	40.6781	UP	11.1478	11.0802	10.2515	11.2802	10.796	11.2912	10.1189	8.14466	11.2521	11.9241	10.3354	10.9484	10.7846	11.4466	8.42206	10.9901	10.5372	11.5377	11.1966	11.7343	9.74651	10.8588	11.0362	12.158	11.5226	10.9665	11.0681	8.41785	12.0825	11.4025	10.4818	11.9546	10.6266	10.6724	12.4861	7.8009	11.8626	10.5382	9.81858	7.90087	10.0348	11.31
CDCP1	1.26453	12.4509	6.06418	3.03379e-09	3.889e-08	10.5292	UP	12.8492	12.9194	12.7783	13.4282	13.8438	13.7435	12.242	11.2015	12.5663	12.7011	10.5196	13.232	13.8096	13.579	10.4157	12.5978	12.4589	12.4951	13.1155	12.4001	11.9465	11.9794	13.8655	12.4878	12.8767	12.4934	13.1445	11.825	15.1495	12.7241	12.8595	13.7154	10.9858	12.445	14.3174	10.0526	14.6302	11.207	11.4009	9.57365	13.0498	13.2038
CDH1	1.2512	14.3095	4.55204	7.02819e-06	4.02062e-05	3.08568	UP	14.5435	13.1895	13.5379	15.2724	15.255	15.991	14.909	11.9929	14.4717	15.0801	13.4808	14.7135	15.2334	15.6407	11.5882	15.2526	14.4057	14.61	15.3878	15.0444	13.9294	14.0076	17.0216	14.7493	15.4567	14.9822	15.1576	13.8724	14.4956	13.7481	13.9453	13.8162	14.2611	14.979	15.1062	11.8166	15.7712	13.4575	13.9905	7.77479	14.0961	14.8569
CDH10	-2.01013	2.42614	-5.66819	2.73891e-08	2.91614e-07	8.40333	DOWN	1	4.90689	0	3.58496	0	5	0	0	2.80735	0	6.22882	2.58496	2.80735	2.58496	3.58496	3	5.42626	0	3.58496	0	2.80735	3.70044	0	3.80735	0	0	0	0	0	3.80735	0	1.58496	2.32193	3.80735	2.58496	4.32193	0	5.61471	3.16993	3.70044	1.58496	0
CDH11	1.21888	11.8996	5.39481	1.16697e-07	1.08447e-06	7.00723	UP	11.0921	13.0487	11.7087	13.9706	10.1396	12.233	13.1989	8.53138	13.1031	9.05257	11.6631	12.4856	12.9018	12.9183	14.3769	10.8329	12.0805	10.1331	11.168	10.0954	9.28771	10.9159	12.0379	12.1364	11.1189	9.81057	9.7211	9.00843	11.5255	14.0215	13.5195	12.3012	11.8811	13.7558	10.8431	13.1548	10.5216	9.36194	12.384	12.3982	14.0384	10.9873
CDH16	1.41234	5.42226	2.57818	0.0102831	0.0269199	-3.67618	UP	11.4409	8.58871	6.52356	8.79116	2.58496	6.42626	3.45943	7.69349	6.37504	6.39232	7.08746	4.45943	0	8.55459	4.64386	7.90689	5.55459	7.14975	6.91886	4.52356	10.6537	3	10.6917	12.5243	9.55842	4.70044	6	4.58496	1.58496	2	2.58496	8.18982	7.7879	3	3	5.55459	3.16993	8.8392	4.32193	4.52356	1	7.76818
CDH17	2.42556	11.7541	4.23459	2.83393e-05	0.00014297	1.76361	UP	5.72792	12.7834	7.13955	14.4912	11.4954	16.7881	12.7102	10.4878	16.6825	12.6025	14.1303	13.7607	8.37504	14.2449	9.81538	15.8229	7.08746	14.9713	13.1062	14.5421	11.463	10.2408	14.7682	14.1566	16.0115	12.2995	15.0065	11.0505	14.8274	14.966	6.06609	15.508	12.5253	9.57743	15.0015	11.9712	13.7623	14.7755	11.3106	12.9694	14.0705	13.292
CDH19	-3.61507	5.50882	-7.63758	1.60005e-13	4.85335e-12	20.1081	DOWN	2.32193	6	3.58496	10.1762	0	6.18982	6.33985	3	6.56986	0	6.72792	8.97728	6.64386	7.86419	9.86573	3.80735	6.45943	6.61471	3.58496	0	6	5.85798	4.64386	3.70044	1.58496	4	0	5.04439	1	7.76155	9	2.32193	6.24793	6.12928	4.80735	9.79116	4.90689	6.04439	6.16993	7.22882	2.80735	4.75489
CDH20	-1.36811	2.42708	-6.24084	1.09482e-09	1.5477e-08	11.5162	DOWN	1.58496	1	2	5.52356	1	0	3.90689	1	2.32193	2.32193	2.80735	2	1.58496	3.45943	3.80735	3	5.42626	1	4.24793	1	2.58496	4.39232	2	2	0	3.90689	0	1	1.58496	3.16993	3.45943	2	0	3.16993	2.32193	4.16993	2.32193	5.52356	2	4	2.80735	2
CDH22	-2.8799	3.52454	-7.57973	2.36731e-13	7.00626e-12	19.7258	DOWN	1.58496	6.61471	1	4.52356	3.80735	2.80735	5.04439	2.80735	2.32193	2.32193	3.45943	3	3.16993	6.44294	4.75489	4.08746	6.71425	0	3.58496	0	3.80735	6.82018	0	12.2811	1	2	0	6.33985	1.58496	4.52356	3.70044	3	0	3.32193	4.32193	2.80735	3.45943	7.70736	1.58496	4.39232	2.32193	1.58496
CDH23	-1.08864	7.56284	-4.99206	8.87855e-07	6.76427e-06	5.05988	DOWN	5.04439	8.40939	5.75489	8.83289	7.69349	8.19967	10.4168	10	7.58496	6.02237	8.33539	6.24793	6.84549	8.35755	10.6653	6.22882	8.27146	5.04439	5.08746	6.02237	6.72792	6.56986	6.44294	9.42626	5.9542	6.37504	5.04439	5.58496	6.62936	7.62936	8.91588	6.45943	6.50779	7.08746	9.2854	8.52748	6.88264	8.48784	7.27612	7.59991	8.12928	7.91289
CDH24	1.07179	9.30649	7.73267	8.36569e-14	2.65801e-12	20.7412	UP	9.224	10.8041	8.20945	10.3966	11.0768	10.3837	9.62753	7.60733	10.0265	9.95565	9.23601	9.00282	9.85175	9.75989	9.50581	8.82972	8.80735	9.41151	11.1222	11.3641	8.53528	9.86882	9.57932	10.2479	9.43463	9.72792	9.35094	8.77808	10.032	10.1137	10.5565	10.7624	9.90388	9.65284	9.08746	8.79766	10.2854	7.91289	8.80735	7.49185	9.69523	8.79766
CDH3	2.8663	10.7329	9.15359	2.7095e-18	2.09183e-16	30.8569	UP	12.431	7.87036	10.9542	13.0097	11.8166	13.6738	10.9144	9.3443	8.66534	10.9114	10.4707	11.236	14.3681	11.9823	11.0007	12.4979	11.988	9.03067	13.5847	13.3209	10.2312	10.5275	14.6207	11.3685	11.0688	8.18488	12.2408	11.8688	7.91886	12.5297	11.463	12.4676	11.207	10.2444	10.8556	9.64746	12.3382	11.8186	8.69349	7.40088	9.17243	12.3669
CDHR1	-1.70358	5.09603	-3.91865	0.000104454	0.000464839	0.534839	DOWN	3.90689	5.16993	3.70044	4.85798	5	4.16993	7.64386	4.80735	2	0	5.35755	3.32193	4.39232	6.37504	5.64386	7.5157	5.88264	1	14.1915	2.32193	1	4	5	8.7211	6.59991	3.80735	4.32193	6.90689	3.80735	9.75489	6.87036	5.49185	3	3.58496	2	6.18982	5.42626	11.5033	3.32193	9.01959	4.80735	4
CDIP1	-1.03068	10.3166	-6.00006	4.36678e-09	5.44237e-08	10.1768	DOWN	8.9629	12.3832	8.27146	11.4424	11.275	11.4268	11.3298	9.89178	10.1459	11.4732	10.3772	8.69349	8.83289	11.236	10.978	8.80413	9.29002	8.47168	6.82018	10.8313	8.5812	10.1497	8.07146	12.4393	11.5589	10.7262	7.85175	8.80413	12.118	11.6142	11.0861	9.10591	10.8074	10.6184	11.5527	11.3476	10.9809	9.42206	11.4615	10.6777	10.2992	10.6475
CDIPTOSP	1.17872	3.22199	3.48586	0.000543995	0.00203612	-1.00442	UP	2.58496	6.62936	0	3	5.72792	1.58496	2.58496	4.58496	5.70044	4.08746	1	2	1.58496	0	2.80735	4.9542	4.45943	2.32193	2.80735	0	5.12928	5.39232	2.80735	6.14975	3.58496	6.14975	2.32193	2	2.32193	1	7.5157	4.32193	6.59991	3.16993	4.75489	1	6.22882	6.02237	3.80735	3	3	5.12928
CDK1	2.42541	11.1398	12.0177	1.11898e-28	7.34308e-26	54.3437	UP	11.2603	12.3326	10.5555	11.2246	12.0928	13.137	10.0607	9.32643	12.4107	11.5507	9.92926	12.0543	11.6874	11.8876	9.3443	12.021	10.9593	12.2342	12.3509	12.84	10.3197	10.7499	12.5464	12.6463	12.7545	11.6587	12.3174	8.89178	13.3915	12.2958	12.1941	12.1399	11.6484	11.528	13.3544	8.6865	12.9425	11.5103	10.5878	8.59246	10.4594	11.4757
CDK15	-1.03087	4.72169	-4.40658	1.34522e-05	7.27817e-05	2.46913	DOWN	3.45943	4.80735	4.08746	5.24793	2.58496	5.20945	6.47573	2.80735	4.45943	1.58496	5.42626	3.58496	4.90689	5.12928	6.35755	4.75489	7.25739	2.58496	5.52356	1	3.70044	6.85798	3.16993	4.16993	2.58496	3.58496	2.58496	5.12928	1.58496	5.42626	5.9542	3	3	5.32193	5.32193	4.16993	4.64386	7.60733	2.80735	6.30378	4.52356	4.75489
CDK5R2	-1.37387	4.70843	-3.19964	0.00148388	0.00495848	-1.9292	DOWN	4.90689	12.8638	3	4.85798	8.57365	5.20945	4	3.80735	4.85798	4.24793	3.32193	5.9542	4.45943	5.78136	6.72792	7.49185	5.12928	2.32193	5.16993	0	2.80735	6.78136	6.80735	13.3295	3.90689	4.39232	5.20945	3.32193	0	12.3123	9.31967	4.58496	5.61471	5.39232	4.16993	6.9542	4.32193	5.49185	4.64386	4.70044	1	2
CDK6	1.1081	12.3542	5.24628	2.50337e-07	2.16266e-06	6.27372	UP	11.2656	9.91588	12.0647	13.4205	12.9298	12.8078	13.6478	10.8009	13.9804	10.2597	11.6865	12.6762	10.8742	13.9429	11.9318	14.4456	12.7676	10.8074	12.2453	12.9061	11.7082	12.5663	13.4384	12.4525	13.2166	10.8329	11.8392	10.8305	12.4291	12.0331	13.2697	12.5265	10.8065	16.1629	11.8853	12.1646	13.0637	10.5216	10.7928	12.1261	12.7035	13.0831
CDKL2	-1.01795	5.41074	-3.4983	0.00051994	0.00195418	-0.962513	DOWN	4.08746	5.88264	3.16993	6.59991	6.26679	4.75489	6.78136	6	5.83289	4.64386	3	5.75489	5.78136	6.42626	8.59246	6.20945	6.89482	5.83289	5.64386	1	5.85798	6.72792	7.30378	7.65821	3.70044	7.10852	3.32193	3.70044	6.30378	7.88874	6	3.80735	4.52356	5.16993	5.80735	7.82018	6.49185	7.40088	4.58496	6.80735	3.70044	3.70044
CDKN1A	-1.13415	12.6405	-6.88192	2.24463e-11	4.52694e-10	15.2905	DOWN	13.3411	13.8966	11.9252	12.3066	13.8929	12.3267	12.6865	11.058	12.5788	12.0954	13.0165	13.4593	13.3055	12.748	13.0592	12.5228	11.2854	12.0144	13.3615	12.1215	11.8514	11.0768	14.5259	13.1021	13.2715	10.6812	12.3611	11.332	12.9607	13.7311	14.7057	13.3593	13.4525	13.5536	13.5656	12.2366	13.648	11.5137	12.6826	11.2562	13.545	12.908
CDKN1C	-1.19651	9.91008	-4.95281	1.07458e-06	8.03795e-06	4.87722	DOWN	7.29462	10.5784	8.06609	11.0573	10.8719	12.2503	10	9.17991	9.23601	8.43463	10.0154	9.17243	10.0928	9.60733	11.9222	8.59619	8.70736	6.80735	10.1911	10.7134	9.76487	10.3912	10.0607	13.7037	8.27146	7.58496	8.14975	8.47978	7.2384	10.2503	12.1095	9.84078	10.4105	9.33762	8.69349	10.9054	8.82972	8.17493	9.86419	9.92926	9.21189	8.26679
CDKN2A	1.81851	9.28058	4.39923	1.38948e-05	7.50115e-05	2.43842	UP	6.49185	13.4615	9.61471	8.83289	3.90689	14.2838	9.70044	10.7448	8.5157	5.42626	9.11114	10.8634	8.91588	10.3174	7.06609	7.52356	10.8082	5.52356	5.45943	4.90689	8.11894	5.52356	9.49586	11.6275	10.1267	6.02237	6.14975	9.89026	5.72792	12.7056	7.66534	8.88874	11.821	9.85643	8.92184	8.77808	8.37069	12.9421	9.4818	7.69349	9.0634	9.14975
CDKN3	1.65641	9.57721	8.09806	6.56797e-15	2.65866e-13	23.2272	UP	9.22641	10.8431	9.01123	9.53333	9.87958	10.1459	8.44294	6.80735	10.8811	10.3432	9.84392	10.314	9.89936	10.5812	8.65105	10.9285	8.87652	10.6733	10.8361	11.0782	8.11894	10.2633	10.5392	10.1254	11.2814	9.10852	10.749	8.20945	10.7657	9.37504	9.25267	10.2155	11.668	11.1867	10.3264	7.42626	10.2216	9.32418	9.81218	7.92481	8.91588	9.94105
CDO1	-2.06828	5.61408	-6.38518	4.68093e-10	7.18219e-09	12.3399	DOWN	3.32193	6.16993	4.45943	8.68299	3.70044	5.93074	8.7211	3	6.02237	3.32193	7.32193	6.22882	4.45943	4.90689	8.89178	4.45943	6.30378	1	5.12928	2.32193	4.90689	6.96578	4.45943	5.49185	2.58496	3	4.16993	4.08746	2.80735	6.88264	7.33985	3.45943	5.52356	7.01123	3.58496	8.76818	3.80735	6.32193	5.58496	6.42626	7.42626	4.32193
CDRT15	1.11215	2.32962	4.4305	1.21046e-05	6.61528e-05	2.56926	UP	3.16993	1	2	4.08746	4.64386	2.58496	5.08746	0	2	1.58496	1	1.58496	2.58496	3	4.39232	3.70044	2.58496	4	3	3.16993	1	2.58496	2.80735	3	2.58496	3.45943	3.58496	0	2.32193	1	3.45943	3.90689	2.32193	3.32193	2.32193	2.58496	2	4.32193	0	3	5.12928	1.58496
CDSN	1.24494	2.37079	4.37245	1.56266e-05	8.34886e-05	2.32707	UP	1.58496	1	0	2	5.08746	3	4.08746	2.32193	6.30378	1	1	2	3.58496	1	2	1.58496	1	1	2.32193	2.80735	1.58496	1	6.82018	3.45943	2.58496	2.32193	2.80735	0	2.32193	3.45943	4.52356	5.20945	1	2.58496	3.45943	2	1	3.32193	0	1.58496	2.32193	3.45943
CDT1	1.86166	10.5765	8.30855	1.46149e-15	6.84112e-14	24.6968	UP	11.5531	11.3061	10.7056	12.2336	11.0396	11.4686	9.82177	6.50779	11.7785	12.5555	10.584	11.2324	10.9527	11.952	8.38802	9.74819	10.2021	11.0112	12.0396	11.796	8.84862	10.3869	11.5517	13.043	12.3802	11.1485	11.7043	9.64386	12.8154	11.8166	11.4231	12.5103	11.525	9.53333	10.3859	8.3837	11.3426	9.68825	10.9915	6.71425	9.42836	10.4242
CDX1	1.8911	8.63062	2.7508	0.00621064	0.0174329	-3.22718	UP	2	12.2712	5.04439	12.9138	10.0375	13.2108	6.74147	6.88264	13.3753	10.7432	13.5816	9.76487	6.08746	14.4198	5.42626	13.1998	3	9.98584	13.5277	13.6788	9.57175	4.90689	11.611	13.1632	14.4603	7.27612	10.8773	1.58496	1	13.0002	5.16993	14.0031	10.137	5.88264	11.8826	10.0701	7.50779	12.1583	10.5245	10.543	11.5098	9.84235
CDX2	3.01499	9.54725	5.81925	1.1997e-08	1.37562e-07	9.20004	UP	2.58496	9.48985	4.64386	13.4688	11.275	13.2469	9.61102	5.85798	10.6101	10.6786	11.224	11.5338	9.78627	12.1491	7.40939	10.6812	6.2854	12.6937	14.4731	11.6147	7.83289	10.7944	11.9669	11.9705	13.5807	11.6239	11.7241	6.59991	1	14.6043	8.18488	12.8273	10.1523	8.87036	11.1447	8.49985	12.6544	12.196	10.5821	10.633	11.762	10.8258
CEACAM20	-1.37494	3.39636	-2.90487	0.00387468	0.0115395	-2.80278	DOWN	0	3.90689	2	4.45943	2	4	4.52356	7.2854	2.58496	1	2.80735	1.58496	1	4.52356	0	3.32193	5.75489	0	4	4.58496	6.6865	5.45943	8.08215	3.16993	6.26679	3.80735	0	0	0	1	4.75489	2.58496	2	4.75489	5.08746	3.16993	3.58496	7.10852	3.16993	2.80735	1.58496	1
CEACAM22P	1.06765	2.85274	4.08139	5.3906e-05	0.000256196	1.15683	UP	2	2.32193	1.58496	5.52356	1	3.32193	5.04439	2	3.45943	0	2.32193	0	1.58496	1.58496	3.16993	4.70044	6.45943	2.32193	4.52356	1.58496	1.58496	6.24793	5.75489	4.32193	2	4.45943	2.58496	1.58496	2.58496	2.80735	4.85798	2	0	2.32193	3.45943	3.16993	2.58496	8.14975	3.16993	3.70044	3.70044	3.32193
CEACAM5	1.3996	13.8708	2.39698	0.0169814	0.0415334	-4.1172	UP	15.9591	14.6065	11.227	17.5185	15.9681	17.8744	15.913	10.9241	16.9964	8.56986	13.5625	10.8796	13.522	17.1274	12.9697	15.8467	13.0541	17.8867	17.5026	14.2026	14.0295	16.5094	16.8758	16.371	14.4834	15.0263	18.1349	13.72	13.0264	18.4652	10.4041	15.36	14.4741	18.0168	16.6786	14.0524	14.4773	15.8119	13.0039	12.8906	17.5741	15.9398
CEACAM6	1.85509	13.5342	3.41088	0.000712385	0.00258364	-1.25393	UP	14.1275	11.7207	12.1715	16.078	15.1885	17.4022	15.9914	11.0175	16.6925	7.08746	13.3846	10.7499	11.6618	14.7926	10.2479	16.791	14.2255	15.8412	16.518	12.6113	14.4149	15.6693	17.4123	13.9477	13.4756	14.3945	16.9283	14.1844	13.4956	17.9227	11.1118	15.0173	15.3124	18.6463	15.6886	13.5906	13.4041	14.608	13.0835	12.9569	16.9085	14.4084
CEACAM7	1.44165	8.37791	2.46043	0.0142922	0.0357767	-3.96633	UP	10.7432	7.86419	7.18982	10.6484	11.4351	10.2143	5	7.39232	8.6865	4.45943	4.52356	6.90689	8.52356	11.5868	3.58496	10.062	7.91886	11.7912	5.9542	9.9901	13.2581	6.85798	5.55459	10.1536	12.4346	12.9515	12.1315	8.53916	10.2842	14.57	6.39232	12.5551	9.54882	14.1559	9.53333	5.16993	9.26679	10.7389	10.6257	4.39232	6.18982	12.101
CEACAM8	1.20569	3.51374	4.1576	3.92454e-05	0.000192084	1.45611	UP	3.45943	3.16993	3	5.52356	5.49185	4.85798	5.08746	0	4.24793	0	1	2.80735	4.58496	2.32193	2.32193	5.39232	6.55459	5.12928	5.39232	0	3.80735	5.93074	4	4.24793	2.58496	4.08746	5.83289	3.32193	3	6.14975	3.16993	3.70044	2	6.06609	4.39232	2.58496	3.16993	7.3837	0	3.80735	5.04439	3.70044
CEBPD	-1.03318	12.8315	-6.07901	2.7874e-09	3.60156e-08	10.6112	DOWN	12.0063	12.3371	12.0914	13.1696	12.3103	13.6599	12.8445	12.2009	12.2327	13.444	13.2559	13.5498	11.9061	13.243	14.4943	11.1843	12.6845	12.7035	11.158	12.1821	13.2072	12.5563	12.2735	11.9318	13.2512	13.8272	12.1724	11.2052	12.1833	13.6847	13.8486	13.3765	13.2318	12.6937	12.1228	13.9794	13.3754	13.3432	13.2344	11.7245	13.9314	12.3737
CELA2A	-1.15739	1.85753	-3.71508	0.00023154	0.000951821	-0.210104	DOWN	0	1.58496	0	3	1	1	3.70044	5.58496	2.58496	1	1	1.58496	0	2	3.58496	2.58496	5	0	3.58496	1.58496	1	5.90689	0	3	1.58496	3	0	1.58496	2	2	4.08746	1.58496	0	3	2	1.58496	1	6.98868	0	2.58496	2	0
CELF2	-1.32642	10.8427	-5.49271	6.99045e-08	6.85466e-07	7.50039	DOWN	10.29	10.8773	10.7279	11.5172	12.2874	10.5953	13.7196	6.94251	10.6821	7.71425	11.6457	10.865	12.5981	12.4318	13.3906	11.8994	11.4231	7.87652	12.0539	9.10591	9.33762	10.3049	8.04985	9.58871	11.0258	9.7879	8.64386	8.97728	10.7582	11.4752	10.5718	10.9076	9.37938	11.0112	9.47371	13.8544	10.9374	8.26679	10.2866	12.1066	12.0109	11.2101
CELF3	-2.16258	4.91131	-5.26412	2.28622e-07	1.9917e-06	6.36086	DOWN	2.80735	13.0381	2	5.42626	7.65105	5.39232	4.75489	3.32193	4.24793	2.80735	6.40939	5.08746	2.58496	6.9542	6.44294	5.49185	5.32193	2	5.16993	2	5.24793	3.80735	5.04439	13.6999	5.08746	3.16993	2.58496	4.24793	1.58496	3.90689	3.70044	2.32193	0	3.45943	4.08746	7.45943	5.85798	7.65821	3	4.39232	3.58496	4.75489
CELF4	-1.05203	4.98407	-3.23619	0.00131052	0.00444447	-1.81528	DOWN	2.80735	7.33985	2.80735	7.53916	4.70044	10.3498	5	6.74147	3.45943	2.58496	5.35755	5.97728	4.08746	5.61471	7.62205	5.20945	6.78136	3.32193	5.9542	4	3.70044	6.79442	2.58496	8.70044	1.58496	5.08746	1	3.45943	3.16993	6.45943	5.2854	3	3.58496	7.07682	4.08746	6.71425	4.16993	7.12928	4.70044	4	4.45943	4.32193
CELSR1	1.40744	11.2695	6.03784	3.52481e-09	4.45979e-08	10.384	UP	12.6872	13.3759	12.0684	12.5459	13.9706	12.6133	11.823	10.1007	12.2796	10.3376	9.7364	11.5387	14.5066	12.4284	10.2715	10.2204	10.8154	10.3674	12.6353	12.1762	10.7871	12.1319	10.1072	12.9155	10.5812	12.357	11.6537	11.2186	10.0417	11.937	12.2917	9.88264	11.3821	13.4728	11.2633	10.3208	13.4177	8.96	10.4315	8.48382	12.8134	10.9972
CELSR3	2.27332	9.8636	8.87388	2.27179e-17	1.50822e-15	28.7732	UP	10.102	12.2636	7.76155	9.98299	13.7772	12.4921	9.08746	8.81378	12.6461	11.4818	7.70044	10.6733	11.4357	10.5068	9.55459	8.3443	10.6519	11.0728	11.1066	10.1923	10.0362	12.1724	12.4305	12.9841	7.98299	9.85175	9.91139	8.32193	11.5656	11.4645	11.1548	10.9658	10.4696	10.5324	10.1662	8.28077	12.9313	9.41363	7.8009	7.88874	11.1453	8.16993
CEMIP	3.5351	10.803	10.47	7.15065e-23	1.32614e-20	41.2029	UP	8.90689	13.3902	9.46557	12.3115	13.3997	12.5882	13.7932	7.02237	13.8507	5.80735	7.53916	11.7266	13.1346	10.7406	11.9669	12.2342	9.84549	9.26913	13.414	9.99435	8.27612	10.2992	12.899	10.0566	10.2095	8.88264	12.2712	10.0835	10.8541	13.7066	10.0279	11.762	11.0761	14.7465	8.85175	9.83131	12.014	9.75822	10.2288	6.83289	17.3284	11.9629
CEMIP2	1.23125	12.7667	8.2183	2.79273e-15	1.2265e-13	24.0634	UP	11.0768	11.4681	11.6636	13.4666	15.1074	14.2944	14.0126	10.9586	14.2398	12.8041	11.7444	13.2406	11.849	13.7953	12.6117	13.8084	12.7711	12.7912	12.3507	12.7918	11.3049	12.4651	14.9391	11.2998	12.7649	12.4648	12.1643	9.97011	12.4126	12.5646	13.1244	13.0398	12.4181	14.0766	13.3641	12.3529	13.617	11.5118	13.0642	10.1649	13.7977	13.4981
CEND1	-1.34957	4.80365	-5.1659	3.75648e-07	3.11585e-06	5.88418	DOWN	4.39232	6.20945	5.08746	5	3.16993	5.08746	4.90689	1	4.52356	3.16993	4	5	4.08746	6.08746	7.85798	2.32193	5.49185	6.75489	4.64386	5.08746	2.32193	5.04439	3.90689	8.90989	5.16993	4.52356	2.58496	1	4.70044	5.64386	5.2854	4.64386	4.45943	4.32193	4.24793	6.93074	3.16993	4.45943	5.78136	5.55459	5	4.52356
CENPA	2.46596	8.68544	10.2902	3.16759e-22	5.02748e-20	39.7411	UP	9.0954	9.62205	8.74483	9.25974	8.96	10.7194	7.26679	6.76818	10.0182	9.84235	8.09803	9.61102	9.39017	9.29232	7.11894	9.06609	8.40514	8.70736	9.99294	10.2033	7.74147	8.72451	9.92926	9.77972	9.54303	8.73132	8.87036	7.10852	11.1674	9.91588	9.01681	10.0607	9.58496	8.83605	10.4645	5.85798	9.96434	9.04985	8.27612	6.6865	8.45121	8.7879
CENPE	2.10707	10.3831	10.9158	1.67709e-24	4.37319e-22	44.8901	UP	9.8009	10.0593	10.0941	11.4848	10.8865	12.138	10.446	8.78463	11.7419	10.2456	8.90388	11.7768	11.7406	11.1421	9.80413	10.9873	10.5546	10.2009	12.0039	12.4323	8.49985	10.1724	11.4247	11.3961	11.762	10.5887	10.007	8.78136	15.0609	10.6357	11.0987	12.0577	10.1344	10.8887	11.4727	9.12153	12.0272	10.7532	9.74483	8.19476	10.676	10.9381
CENPF	2.77191	11.9908	13.3986	3.66275e-34	8.92768e-31	66.7701	UP	11.5531	13.3707	11.676	12.8628	13.278	13.7687	11.445	9.03892	14.0609	12.1463	10.4615	13.4295	13.5591	13.2317	10.4656	12.8994	12.178	11.4823	14.0613	12.8118	9.63481	11.4808	13.3826	14.3344	13.0097	11.8269	12.1383	10.0941	14.173	11.4574	12.9728	13.4945	12.117	12.9105	11.7773	9.85019	13.6555	12.0708	10.7952	9.64205	12.245	11.4247
CENPH	1.03328	8.72059	6.33595	6.26518e-10	9.35637e-09	12.0572	UP	9.59059	8.26679	8.30378	9.43879	9.6987	10.2216	8.77149	5.67243	9.28309	9.20457	8.50383	9.86573	9.17742	9.51964	7.79442	9.17991	8.76487	8.12412	9.89026	9.66711	6.62936	8.76487	8.15987	10.0307	10.3387	8.82018	9.04712	6.47573	10.817	9.13186	8.34873	10.1948	8.12928	9.22159	8.77808	7.59246	9.37938	9.24317	9.18735	6.61471	8.18982	8.10852
CENPI	1.84876	8.36111	10.4108	1.1691e-22	2.04586e-20	40.72	UP	7.88264	9.0954	8.01123	8.53528	9.56605	9.04712	8.58871	4.70044	9.60363	8.59991	6.37504	8.33985	9.07682	9.11894	7.32193	9.35755	8.68299	8.39232	10.5708	9.39232	6.76818	7.89482	9.86882	10.6138	8.633	8.49185	7.87036	5.42626	10.2877	10.2058	9.09276	9.38802	7.40939	9.30834	9.48382	6.59991	9.40939	9.20701	8.08746	6.6865	8.69349	8.12928
CENPK	1.89471	8.92007	10.4509	8.37979e-23	1.52102e-20	41.0471	UP	9.50184	8.53138	8.44294	9.56796	9.40088	10.0875	8.76155	6.9542	9.96578	9.19722	7.75489	9.50184	9.3015	9.30606	8.21917	9.56224	9.25267	9.26209	9.9629	9.93664	8.00562	9.51767	9.41785	11.643	9.55267	8.83605	10.4522	7.18982	10.4471	10.0014	9.03342	9.89785	7.36632	9.64566	10.0056	7.26679	10.2276	9.52748	8.56605	7.26679	8.99435	9.25267
CENPL	1.30891	9.15074	10.3979	1.30134e-22	2.2315e-20	40.6147	UP	8.43463	9.66711	8.47978	9.56605	10.0028	10.4584	9.46148	6.61471	10.5108	9.39017	7.90689	9.50978	9.49386	10.0566	9.01402	9.17243	9.1267	9.0634	10.5736	10.098	8.2384	8.40088	9.81698	10.8595	9.87344	9.44294	9.33316	6.83289	10.5999	10.0458	10.3696	9.37069	8.6865	9.59432	10.1124	8.44708	9.62936	9.18735	8.52748	7.31288	9.06609	9.87958
CENPM	1.60071	9.13945	7.09416	5.81876e-12	1.29777e-10	16.6045	UP	10.5793	10.3343	9.49185	8.66534	10.3376	9.99152	8.32193	5.88264	9.36194	11.1561	9.64205	9.5216	9.19476	9.9263	7.09803	8.91886	9.56415	8.91588	10.4929	10.8865	7.99435	9.12153	9.42626	9.85643	10.4221	9.87652	9.56415	7.63662	10.6448	9.21917	8.40939	10.8106	9.62022	10.4727	9.43879	7.02237	10.6202	8.75822	9.84078	6.32193	8.10329	9.18982
CENPN	1.09834	9.8897	7.65118	1.45882e-13	4.44075e-12	20.1983	UP	10.1176	9.44087	9.8933	10.8025	10.3554	10.8727	9.55651	6.42626	10.5953	10.268	8.77149	10.5245	10.1636	10.7305	9.48985	9.99577	9.43045	10.1997	9.8857	10.7065	8.40939	9.75989	10.3805	11.4067	10.7364	10.2324	10.7271	8.50779	11.7172	9.68825	9.98584	10.5708	9.68475	10.0688	10.4294	8.96867	10.643	8.66534	9.42417	7.60733	10.4615	9.7364
CENPO	1.44637	9.67797	10.9655	1.0983e-24	2.95105e-22	45.3061	UP	9.79116	10.421	9	10.3619	10.0728	11.3912	9.93664	7.56224	10.6777	10.421	9	9.25503	10.1948	10.2228	8.82018	9.40301	9.46557	9.47978	10.4009	9.90388	8.04439	9.224	11.1248	11.0224	9.67419	10.7004	9.46761	7.76818	10.8925	10.6891	9.47573	10.363	9.16239	9.62205	11.4742	8.25267	10.6573	9.44294	9.32867	7.32193	9.96723	9.73302
CENPU	1.75044	9.66892	8.66403	1.08864e-16	6.28572e-15	27.2385	UP	9.82177	9.49985	9.82018	10.6662	11.1805	10.2408	9.2854	7.49985	11.2894	9.68825	9.35315	9.28077	9.29002	9.92184	8.14466	10.7499	8.79116	10.1762	10.6221	11.4548	7.33092	9.40727	11.0362	10.7381	10.3231	11.0423	10.1948	9.22159	10.1636	8.26679	9.9542	10.5727	9.45738	10.0458	10.5981	7.19967	11.6316	9.92333	8.82972	6.62936	9.60548	10.0566
CENPW	1.17762	9.11438	6.23532	1.13061e-09	1.59096e-08	11.485	UP	10.1267	9.88874	8.99718	8.69	8.81378	10.3652	7.75489	7.55459	10.42	9.49586	9.04166	10.0741	9.14211	8.78136	9.17742	9.26444	8.42206	9.52748	10.9454	10.8162	8.0607	10.6165	10.3923	9.07146	10.5812	9.01123	10.0471	9.20212	9.98442	9.92778	9.44087	10.3163	9.93369	9.37504	10.5632	8.73132	9.76818	10.5206	8.27146	8.36194	8.10852	8.8857
CEP152	1.01793	8.87107	7.37268	9.45044e-13	2.45424e-11	18.3756	UP	7.7879	7.90689	8.16491	9.32643	10.0112	10.3619	9.84862	6.93074	10.0098	8.63662	7.63662	8.85798	9.31741	9.32867	9.20212	9.19722	8.86728	8.32643	10.1972	9.53138	7.21917	9.18488	9.83131	10.0014	9.13443	8.81378	8.41363	7.98868	9.74651	8.84862	9.15228	10.3185	7.14975	9.60548	8.99435	8.5157	10.2131	9.15735	7.48382	7.27612	9.80574	8.9571
CEP55	2.64591	10.6866	12.8666	5.08648e-32	7.23212e-29	61.9152	UP	10.6008	11.163	10.3805	11.1472	11.8642	11.7524	10.1886	8.30378	11.643	10.9715	9.40514	11.5333	12.3485	11.3723	9.43463	11.1904	11.0244	10.2586	12.0987	12.0914	9.58684	9.67596	11.4979	11.5627	11.6161	10.5038	11.9359	8.08746	14.1894	10.8971	10.7797	12.2024	10.8384	11.8619	12.365	7.98868	12.7166	10.6165	10.5314	8.12412	10.3869	10.9816
CEP72	1.35644	8.91186	7.22601	2.47706e-12	5.94008e-11	17.4363	UP	8.94251	8.68299	8.8009	9.22641	10.5372	10.1536	9.22641	7.45943	10.6008	9.51373	7.5157	8.73471	9.97011	9.59246	7.8009	8.29462	9.78953	7.49185	9.46352	9.00562	8.09803	10.0875	8.80413	10.3923	9.16491	8.56605	10.2143	7	9.72281	8.43463	7.64386	9.70217	8.45121	8.79116	9.60177	8.21432	10.4848	9.12928	8.89482	6.59991	8.66534	8.77808
CERS4	-1.50827	9.17614	-5.57822	4.44123e-08	4.54022e-07	7.93733	DOWN	7.27612	11.9001	7.22882	11.2992	8.77479	9.23601	10.8834	6.24793	8.12412	6.06609	11.0147	8.36632	7.21917	9.67772	10.352	9.60918	9.48784	6.55459	6.84549	9.42417	8.26679	8.51175	6.83289	14.2088	8.82655	8.34873	8.57365	8.36632	6.67243	9.16742	8.92481	7.91886	9.15735	9.14975	7.03342	10.2842	8.20945	10.0808	8.79766	9.21189	9.57365	8.17493
CES1	-2.26737	8.35175	-5.42844	9.7945e-08	9.26094e-07	7.17575	DOWN	5.39232	7.49985	7.75489	11.4605	12.8893	7.24793	6.88264	5.24793	8.19967	4	8.19967	10.0914	5.08746	9.43879	11.446	3.16993	6.76818	6.16993	6.2854	4.75489	8.38802	8.09276	5.20945	9.81858	4	5.32193	4.85798	6.83289	6.59991	10.5028	10.1459	6.87036	9.76487	9.84235	7.96	11.8944	6.87036	7.41785	8.18488	9.96	10.6184	5.55459
CES1P1	-1.93912	2.85741	-5.05737	6.44491e-07	5.08735e-06	5.36666	DOWN	0	2.32193	0	5.75489	5.12928	4.58496	1	1.58496	1	0	2.58496	4.58496	2	4.16993	4.58496	2	4.08746	0	1	4.58496	3.45943	2	1	5.08746	0	1.58496	1	2.58496	1.58496	3.70044	3.90689	0	2.80735	3.90689	3	4.39232	2.32193	5.35755	0	3.90689	5.49185	3.70044
CETP	1.64494	6.40573	8.10661	6.18225e-15	2.5055e-13	23.2864	UP	5.20945	6.6865	6.08746	6.58496	5.32193	6.64386	10.4666	4.24793	7.50779	5.08746	7.70736	5.61471	4.39232	6.6865	7.33985	5.45943	7.40939	5.35755	5.61471	6.42626	5.12928	5.67243	5.58496	5.16993	5.04439	6.06609	4.52356	4.45943	7.02237	6.6865	6.70044	6.75489	5.85798	7.01123	6.16993	6.14975	6.50779	6.16993	6.64386	4.9542	8.20945	7.57743
CFAP157	1.47443	7.48524	9.93406	5.78614e-21	7.20607e-19	36.8888	UP	6.82018	8.62936	6.56986	7.7211	10.4868	8.74483	8.01681	6.10852	8.16993	7.59991	5.85798	6.64386	6.96578	8.82337	7.45121	7.54689	8.30834	6.2854	9.1267	7.99435	6.18982	8.02237	8.82655	9.57932	8.09276	8.14975	7.45121	5.04439	8.38802	9.31741	7.42626	8.07682	7.03342	7.80735	8.23362	7.53138	8.71768	8.08746	7.48382	6.12928	8.26679	8.00562
CFAP221	-1.2847	6.27935	-3.0667	0.00230897	0.0073267	-2.33315	DOWN	9.82496	4.75489	8.22882	9.28771	5.9542	5.16993	6.62936	6.82018	4.58496	3.16993	3.32193	5.24793	4.45943	6.64386	5.72792	4.32193	7.94251	7.77479	5.12928	1.58496	7.26679	7.55459	7.82018	5.49185	7.90689	7.03342	3.80735	5.90689	1	5.39232	8.35755	2	6.02237	8.61102	5.85798	9.28771	6	9.33762	9.0607	6.14975	3.45943	3.70044
CFAP251	1.26303	7.24832	5.85572	9.80399e-09	1.14575e-07	9.39503	UP	6.26679	5.49185	7	9.38586	9.03067	9.19476	8.78463	7.18982	7.37504	4.16993	5.04439	6.39232	6.02237	6.83289	7.52356	7.7879	9.19722	6.64386	8.24793	5.16993	6.98868	9.09276	10.2969	8.3443	5.72792	8.75489	8.60363	5.2854	6.02237	7.98299	8.84235	6.06609	7.8392	8.13443	7.7879	6.02237	6.67243	9.98726	7.55459	6.61471	8.02791	7.48382
CFAP43	1.27265	6.09609	5.94896	5.82493e-09	7.104e-08	9.89821	UP	4	6.55459	4.90689	7.74819	10.2889	7.42626	5.85798	4.70044	5.9542	5.88264	3.90689	6.59991	6.14975	4.9542	5.85798	7.63662	7.34873	5.16993	6.30378	7.2384	5.93074	6.78136	9.26444	6.87036	6.18982	6.78136	7.11894	4	7.47573	5.39232	6.52356	5.72792	4.90689	5.9542	6.35755	5.49185	8.18982	8.30834	6.02237	5.88264	5.49185	5.70044
CFAP47	2.58991	3.6341	6.19802	1.40453e-09	1.93259e-08	11.2748	UP	0	4.64386	0	4.16993	3.16993	5	8.97154	4.08746	1.58496	4.52356	2	3.45943	7.50779	2.32193	2.32193	4.80735	7.15987	7.08746	5.08746	4.32193	3.80735	5.58496	2.58496	6.94251	3.58496	3.58496	1	5.08746	9.69523	1.58496	2.32193	0	3.45943	4	4.70044	1.58496	3.58496	6.74147	3.58496	5.04439	3.58496	8
CFAP52	1.22348	4.16677	5.99215	4.56659e-09	5.68517e-08	10.1336	UP	3	3.90689	1	5.9542	5.97728	5.72792	4.9542	2.32193	4.80735	2.58496	4.24793	3.45943	2.32193	2.80735	2.58496	4.64386	5.78136	4.24793	5.83289	3.32193	3	5.70044	4.64386	6.82018	4	5.39232	3.45943	2.80735	2	3.16993	5.20945	4.52356	5.72792	4.24793	3.80735	3.70044	4.45943	6.98868	3.80735	4.24793	4.08746	4.32193
CFAP61	1.24457	4.09686	5.53987	5.44686e-08	5.4491e-07	7.74068	UP	3.70044	6.14975	3.80735	6.18982	7.54689	5.24793	4.58496	2	4.52356	4.70044	0	2.80735	5.04439	4.52356	3.58496	4.85798	6.90689	3.32193	4.75489	3.32193	2.80735	6.67243	3.45943	7.80735	3.70044	5.2854	4.16993	3.32193	2.80735	4.52356	4.70044	4.24793	1	5.55459	4.70044	3.80735	6.2854	7.60733	4.08746	4.75489	5.35755	4.39232
CFAP74	1.19383	4.65562	3.94496	9.4002e-05	0.000422736	0.633806	UP	2.58496	5.04439	2.32193	7.45943	6.97728	4.64386	5.12928	4.32193	5.2854	1	2.80735	2.32193	2.80735	3.70044	4	5	7.29462	3.32193	5.24793	4.24793	3.32193	6.49185	7.12928	11.3966	5.67243	8.69	2.80735	7.12928	2.80735	4.08746	5.32193	3.58496	4.90689	4.90689	5.08746	2.32193	5.72792	8.73471	4.24793	5.39232	6.49185	3
CFAP91	-1.16606	6.04716	-3.24746	0.001261	0.0042953	-1.77992	DOWN	5.32193	7.27612	2.80735	7.56224	8.59619	9.04439	7.91886	7.02237	6.72792	8.65464	3.90689	6.16993	3	5.83289	8.33539	8.01123	6.67243	6.24793	4.70044	1.58496	6.70044	6.24793	6.88264	4.32193	9.59991	8.03342	6.62936	4.70044	9.01681	6.08746	4.85798	3.45943	3.16993	6.04439	8.14975	8.16491	5.24793	9.57554	6.30378	6.20945	5.32193	5.08746
CFC1	-1.47417	1.01903	-5.24589	2.50831e-07	2.16583e-06	6.27182	DOWN	0	6.55459	0	2	1	0	2	3.16993	0	0	1	0	0	1.58496	2	0	3	0	0	0	1	3.16993	1	8.02237	0	3.58496	1	3.58496	0	2.58496	1.58496	0	0	0	0	1.58496	1	2.32193	0	2	0	0
CFD	-3.14642	10.4252	-11.835	5.68554e-28	3.27273e-25	52.7449	DOWN	9.85643	9.95274	8.97154	10.3117	9.38802	11.4502	10.2155	7.8392	9.97011	10.5127	14.1841	11.1643	9.04985	11.3647	12.1827	6.24793	7.8392	8.26679	8.87344	12.1079	10.5226	9.60918	10.4686	8.09276	9.9629	8.94837	8.83605	10.2216	10.1935	12.2177	10.314	11.1611	11.4671	8.78463	10.0458	10.1267	11.9118	8.224	9.0954	8.80735	8.55842	9.93074
CFHR4	1.14229	1.45559	3.63062	0.000318846	0.00126648	-0.508305	UP	0	0	0	6.18982	0	5.24793	3.45943	2.32193	2	0	0	0	1.58496	0	0	2.80735	3.45943	5.35755	3.70044	0	3.32193	4.08746	0	4.9542	0	5.35755	0	1	0	3.80735	4.45943	0	0	1	1.58496	1.58496	0	6.10852	3.80735	4.39232	1	0
CFL2	-1.46418	10.6587	-6.18173	1.54367e-09	2.10116e-08	11.1833	DOWN	9.86264	11.0056	9.19476	11.041	10.1396	10.8041	10.4747	8.44708	11.2615	8.54303	9.53333	12.5098	9.93517	10.5078	15.2281	8.05528	9.88264	9.84078	9.69523	8.94837	9.5216	10.7296	9.34207	9.70736	9.27612	10.4522	9.05257	9.26679	10.1344	11.6013	10.8463	9.2738	10.5147	11.5328	9.86109	15.3527	9.37938	8.91886	11.0735	13.5269	11.258	10.0485
CFP	-1.16878	6.99257	-6.1255	2.13537e-09	2.81668e-08	10.8691	DOWN	5.97728	8.44294	6.16993	7.35755	5.16993	7.56224	9.7211	4.9542	6.26679	5.83289	9.65464	4.24793	6.35755	8.633	8.81698	5.80735	8.0607	5.58496	6.58496	4.32193	5.88264	6.42626	4.85798	6.18982	5.80735	6.35755	5.24793	5.64386	7.53138	7.16993	6.56986	6.37504	6.04439	7.5157	7.07682	7.25739	7.58496	6.26679	7.53916	5.90689	8.49586	8.47978
CFTR	1.33071	10.3366	2.85932	0.00446412	0.0130714	-2.93056	UP	10.6662	10.2935	11.6944	10.5304	11.7682	12.7207	13.4555	7.56224	12.5467	6.40939	11.3168	5.45943	8.41785	11.3794	9.03892	13.6598	11.2491	12.5023	13.7814	8.66178	9.50184	9.83447	10.128	11.0279	12.9669	10.0251	11.6515	8.33539	0	14.2502	8.0607	12.608	9.57175	6.88264	11.7185	11.0593	9.3837	11.4959	10.817	9.21189	6.85798	11.8439
CGAS	1.40533	9.81322	9.02549	7.21282e-18	5.23681e-16	29.8973	UP	9.46352	9.63118	10.7895	10.683	9.57743	9.87805	10.4481	8.71425	11.5392	10.0042	8.96867	10.8719	10.7632	10.4949	9.82018	9.4818	10.1293	9.3837	10.021	9.31967	8.78136	9.01123	11.3163	11.3509	9.9263	9.52943	9.88722	7.33985	12.5216	10.3365	10.8657	10.6221	9.5812	8.98584	9.77314	8.90689	10.4367	8.76487	11.3146	7.91289	9.67596	10.4263
CGB5	1.58253	1.88048	3.63641	0.000311984	0.00124255	-0.48805	UP	7.64386	4.52356	0	3.70044	0	4.32193	1	5.45943	5.24793	1	1.58496	1	6.59991	0	0	1	1.58496	1	1.58496	1	3.80735	2.32193	5.2854	2.58496	1	3	2.80735	8.80413	0	1	6.22882	0	7.17991	1	1.58496	1	1	3.70044	0	2	0	3.16993
CGN	1.29857	12.4221	5.38346	1.23785e-07	1.14287e-06	6.95052	UP	11.8572	12.2061	11.7511	13.4077	13.1589	14.5922	13.1592	10.3343	13.9745	12.2665	10.8009	12.7442	11.1453	13.6159	9.95128	12.5529	12.6182	13.232	12.4401	11.1319	12.4336	12.4966	15.7827	13.5314	13.3468	13.8003	12.5798	10.314	12.6371	13.3176	13.7525	12.9705	11.8941	13.2936	15.0558	9.78953	13.7432	13.3763	12.9944	8.52748	11.29	13.0317
CGNL1	-1.90778	9.28035	-7.00113	1.05551e-11	2.25819e-10	16.0247	DOWN	6	9.33762	8.71081	10.341	9.05257	8.79442	12.3035	7.72792	8.72792	6.47573	9.40514	8.91289	8.45533	10.2935	10.9744	7.94251	9.00562	8.45533	7.50779	4.58496	8.10852	9.32418	7.56224	11.8861	5.64386	10.5362	9.09276	8.50383	7.97728	10.2854	10.445	8.33539	9.79928	9.74315	8.29002	10.5555	7.7879	8.48382	9.35094	8.00562	10.4491	7.52356
CH25H	-1.41375	7.53236	-5.22138	2.84026e-07	2.42788e-06	6.1525	DOWN	7.5157	8.64024	6.50779	8.03892	7.01123	7.58496	8.87958	6.98868	7.91289	6.9542	10.0154	6.22882	6.85798	9.06878	9.72451	5.12928	8.49985	5.35755	4.32193	4.70044	7.22882	5.90689	7.04439	7.53138	5.67243	7.26679	7.79442	7.33985	5.42626	9.26913	7.18982	6.2854	7.62936	8.56605	7.69349	7.92481	7.30378	5.24793	7.2384	7.90087	8.90087	7.43463
CHAD	-1.96044	5.80152	-6.82736	3.16029e-11	6.1978e-10	14.9578	DOWN	3.70044	6.18982	3.58496	6	7.57743	7.08746	8.13443	8.54303	4.58496	3.90689	5.08746	3.70044	4.70044	7.78136	5.83289	5	8.62571	4.39232	6.04439	4.16993	8.84862	4.58496	5.83289	5.64386	5.75489	6.49185	3.70044	6.42626	3.32193	5.49185	5.97728	4.64386	3.32193	5.61471	4.32193	5.2854	7.52356	6.78136	3.80735	5	8.60733	6.10852
CHADL	-1.57499	6.96977	-7.54187	3.0556e-13	8.87397e-12	19.4768	DOWN	4.39232	7.29462	4.80735	5.90689	8.57743	7.19967	8.48784	5.9542	5.52356	7.24793	6.65821	6.79442	6.82018	8.02791	8.26679	5.49185	6.75489	4.32193	7.56224	7.05528	7.04439	6.45943	5.45943	8.79766	7.17991	6.59991	5.12928	6.37504	3.58496	6.56986	8.2854	8.17991	8.35315	6.71425	7.99435	8.14975	8.14975	6.08746	8.18982	6.16993	6.12928	7.62205
CHAF1B	1.10918	9.42147	7.00828	1.00854e-11	2.16721e-10	16.069	UP	9.71253	10.1111	9.0634	10.2668	10.3454	10.7039	9.22882	6.83289	9.85175	10.7707	8.64024	10.2312	8.93958	10.4083	8.59991	9.44087	9.37938	9.31967	10.8463	10.9965	8.22882	9.59059	9.82337	11.6198	10.4136	9.66356	9	7.09803	11.5651	10.7271	9.18735	10.7715	8.71081	9.97298	9.82496	7.70044	10.5401	10.2842	10.0593	7.07682	8.93369	9.19229
CHAT	-1.54503	1.30225	-5.39193	1.18456e-07	1.09932e-06	6.99284	DOWN	0	0	0	2	1	0	0	0	0	0	0	1.58496	0	2	5.58496	1.58496	3.16993	0	0	0	0	2.58496	1	5.72792	0	0	1	2	0	2.80735	1.58496	0	1	1.58496	1	3.45943	0	5.45943	2	4	0	1
CHD5	-1.10088	5.61743	-3.62034	0.000331367	0.00130966	-0.544152	DOWN	3.16993	6.16993	4.08746	5.75489	6.82018	4.90689	5.12928	4	5.90689	3.45943	4.16993	5.2854	7.94837	6.61471	8.47573	5.2854	6.40939	3.90689	4.80735	7.13955	4.45943	7.31288	8.02791	10.7432	6.16993	4.32193	3.70044	3.16993	4.70044	7.75489	4.9542	4.58496	6.30378	5.35755	5.12928	7.94837	4.45943	7.90689	5.20945	7.17991	5.04439	3.16993
CHD7	1.02878	11.666	7.81221	4.84188e-14	1.62622e-12	21.2752	UP	10.584	12.2294	10.1599	12.2747	13.0343	14.5396	12.6055	9.61655	13.4661	11.6883	11.4929	12.4579	12.5746	12.7317	11.617	12.7873	11.268	10.9651	12.768	11.6375	10.4136	12.1633	11.9894	14.0247	11.2732	11.9665	11.2854	10.1331	13.0751	11.8815	12.2524	11.9163	10.5028	12.1693	12.451	11.5722	12.3259	13.2803	10.4263	10.2046	12.3487	11.221
CHDH	1.59849	11.0518	8.22954	2.57712e-15	1.13914e-13	24.142	UP	10.4242	9.93811	10.4909	12.3143	12.334	13.4103	11.8408	8.71768	12.5199	12.0637	10.6129	11.7557	10.2761	12.0307	10.1293	8.9629	11.6129	11.2246	11.9278	12.1561	9.74483	12.3977	12.0993	12.1523	11.9192	9.76984	12.4517	9.12153	11.1824	10.4294	10.8595	10.8857	10.9951	10.0755	10.9484	9.76487	12.6083	10.4502	10.983	8.52748	10.944	11.9204
CHEK1	1.44463	10.1751	9.84266	1.20768e-20	1.39698e-18	36.1666	UP	10.2264	10.0993	9.70908	11.221	10.3608	11.8486	9.44087	7.53138	11.6161	10.7682	9.18735	10.792	10.544	11.0526	9.64746	10.4231	10.1485	10.4305	11.4051	11.2837	9.20945	9.70217	10.5689	12.2381	11.3875	11.0258	10.1935	8.79442	11.1799	11.9436	10.2348	11.4067	9.77149	10.8146	10.9099	9.39874	11.8715	10.0307	9.21189	7.9542	9.92333	9.3443
CHEK2	1.153	9.23274	7.84408	3.88485e-14	1.32699e-12	21.4903	UP	9.00843	9.09276	8.78136	10.0795	10.2691	10.7389	8.90689	6.9542	9.52748	9.39874	9.13955	9.80735	9.47168	9.75656	8.61471	10.1849	9.61102	8.74147	9.92184	10.0967	8.62571	9.03617	9.68299	10.6573	10.5793	9.04439	9.80413	7.52356	10.2958	8.76818	9.18488	10.7682	9.23122	9.77149	9.49185	8.11374	10.5294	9.94251	8.9571	7.20945	9.31515	9.26913
CHGA	-4.31465	7.34289	-6.44801	3.21864e-10	5.10376e-09	12.7032	DOWN	1.58496	17.956	3.16993	7.3837	7.08746	6.85798	7.58496	9.67243	4.64386	5.45943	11.7415	4.39232	7.65821	11.937	9.85175	1	12.1621	4	0	2	7.75489	6.33985	2.58496	6.72792	2.80735	6.91886	3	10.891	7.87652	11.5231	4.52356	2.58496	6.08746	4.08746	9.66711	12.0458	10.6055	5	6.16993	5.49185	6.33985	5.39232
CHGB	-2.76929	6.01756	-5.41773	1.03574e-07	9.74994e-07	7.12199	DOWN	3	15.6931	4.75489	7.21917	10.5594	5.58496	7.21917	7.94837	3.80735	2.58496	7.03342	5.04439	3.70044	9.98442	8.23362	5.45943	7.90087	2.32193	6.10852	1	3.16993	7.06609	2	14.5511	1.58496	6.14975	1.58496	6.30378	3	10.2992	4.85798	4	3.32193	5.35755	5.08746	12.062	7.58496	8.44708	5.12928	4	4.08746	3.70044
CHI3L1	2.58753	10.2417	7.38206	8.88092e-13	2.32581e-11	18.4362	UP	10.8337	11.1059	10.8297	13.5266	12.1852	12.4089	9.71939	7.07682	10.0848	8.81057	10.42	10.6348	10.9958	11.9114	12.88	8.45533	9.43254	7.98868	7.7879	10.0014	9.90238	11.2709	7.76818	6.83289	11.5333	11.3304	6.56986	9.17493	11.6609	10.3587	8.77479	12.6658	11.2662	12.9217	10.5137	7.90087	12.0725	8.03892	10.0485	5.67243	15.3438	13.1539
CHIA	-3.3673	1.53434	-7.58616	2.26664e-13	6.73167e-12	19.7682	DOWN	0	2.58496	1	3.16993	1.58496	0	0	8.69	0	0	2.80735	0	0	0	2.32193	1.58496	4.64386	0	3.16993	0	0	2	4.08746	1.58496	1	3.58496	0	9.01123	0	4.52356	1.58496	2.58496	1	0	1	2.58496	1	5	0	4	9.40088	0
CHIT1	2.35174	6.46497	5.02361	7.60906e-07	5.89581e-06	5.20761	UP	10.7846	4.39232	11.7822	9.24317	4.24793	9.29462	11.279	5.75489	6.97728	3.32193	10.3208	3.70044	5.88264	5.88264	2	4.70044	7.10852	8.75822	4.70044	7.75489	6.37504	11.151	7.43463	6.6865	7.52356	9.21189	5.83289	3.16993	9.66534	10.0028	4.45943	12.145	5.64386	5.78136	5.16993	5.85798	5.24793	6.30378	7.65821	4.39232	4.80735	11.545
CHL1	-1.94746	8.13639	-6.43226	3.53637e-10	5.56107e-09	12.6119	DOWN	7.74819	8.3837	6.45943	8.94544	1.58496	6.47573	9.71768	8.02237	8.2854	4.08746	9.17493	8.88874	7.35755	9.05257	11.7125	7.03342	9.21917	7.15987	6.67243	6.64386	7.65105	6.47573	7.11894	7.82655	7.07682	6.96578	7.22882	10.1824	3.58496	8.9542	8.7879	8.24793	6.55459	8.17493	7.93074	9.81057	9.03342	6.58496	7.07682	7.15987	9.31288	8.9629
CHL1-AS2	-2.59938	1.60796	-10.6222	2.00492e-23	4.14641e-21	42.4521	DOWN	2.32193	1.58496	1.58496	1.58496	0	0	2.32193	1	1	0	2.58496	3.32193	0	2	4.64386	0	3.45943	1.58496	0	0	1.58496	0	1	1.58496	1	0	3	1	0	1.58496	2	2	0	1	2.58496	3.45943	0	0	1.58496	1.58496	1.58496	2
CHML	1.153	10.1273	7.42998	6.46072e-13	1.74144e-11	18.7464	UP	9.42206	9.81378	8.31741	11.5637	12.0451	11.1254	10.4357	7.62205	11.66	10.0674	8.45533	10.927	11.5172	10.7855	10.1497	10.6653	9.76487	8.8392	12.2894	10.69	10.3837	8.8857	12.0172	12.4315	9.82496	11.2703	10.5127	8.41785	12.5043	9.83447	12.4017	9.94544	8.87344	10.6821	9.85798	9.65821	11.568	8.51175	9.81538	8.30378	10.3608	9.38586
CHODL	-3.09911	4.22069	-9.52969	1.45454e-19	1.37492e-17	33.7248	DOWN	2	2	3.32193	4.39232	5.35755	5.55459	6.24793	2	2.58496	0	4.80735	5.20945	4.24793	5.55459	8.11894	2.80735	5.08746	4.52356	1	2.80735	3.70044	2.80735	0	4.08746	3.58496	3	2	3.58496	3.32193	4.16993	3.45943	4.45943	3.45943	6.88264	4.08746	6.39232	4.52356	6.24793	5.35755	7.91886	1	4.24793
CHP1P2	1.22487	6.47235	6.70847	6.61191e-11	1.21906e-09	14.2401	UP	5.32193	5.2854	4.39232	7.2854	8.72792	8.37069	8.02791	5.55459	7.39232	5.42626	5.75489	6.22882	8.13443	7.27612	7.37504	7.24793	6.52356	5.64386	5.9542	6.39232	5.24793	7.45121	8.0607	6.64386	6.50779	6.24793	6	5.58496	6.87036	5.70044	7.76155	7.04439	4.45943	6.96578	6.52356	6.82018	8.01123	7.8392	4.45943	5.88264	8.09803	6.91886
CHP1P3	1.18949	2.41118	4.53558	7.57061e-06	4.30064e-05	3.01499	UP	2.80735	1	2.58496	3.16993	4.08746	3.16993	4.80735	2	4	0	0	2.80735	2.58496	2.80735	3.32193	3	4.16993	4.9542	4.08746	1.58496	2.32193	3.58496	3.58496	3.16993	2.32193	0	1.58496	3	2.58496	1.58496	2.32193	1.58496	1.58496	1	1.58496	3.16993	3.45943	2.80735	0	2	3.70044	3.16993
CHRDL1	-3.47475	7.82414	-6.60402	1.25446e-10	2.1522e-09	13.6179	DOWN	7.14975	9.17742	7.32193	7.42626	3.32193	9.98157	12.3603	5.61471	9.37069	5.85798	10.7789	9.33316	7.48382	10.6573	12.5399	6.04439	7.09803	5.32193	2.32193	1	7.25739	10.268	5	9.56986	3.32193	2.32193	5.97728	6.84549	3.45943	10.4878	9.57554	5.39232	8.85487	7.63662	6.12928	12.0984	3.80735	5.2854	6.97728	8.90087	9.36851	6.58496
CHRM1	-1.7566	4.32457	-4.40741	1.34031e-05	7.2552e-05	2.47259	DOWN	1.58496	2.32193	2.80735	3.45943	4.39232	6.44294	3.80735	5.24793	7.96578	3.45943	3.80735	3.90689	3	7.63662	4.24793	5.12928	7.3837	4.08746	6.40939	6.76818	4.85798	5.2854	8.2854	4.75489	6.40939	2.80735	6.26679	5.78136	0	4.45943	1.58496	1.58496	4.75489	6.06609	2	4.39232	4.58496	5.78136	5.20945	3	8.02791	5.32193
CHRM2	-3.12282	5.64544	-5.20083	3.15113e-07	2.66293e-06	6.0528	DOWN	2.58496	6.45943	6.85798	7.3837	1.58496	4.32193	4.32193	2.58496	8.60363	1	2.32193	10.4273	3.58496	6.64386	12.2195	2.32193	6.10852	3.70044	4.32193	2.58496	4.24793	10.2923	2.32193	2.80735	2	1.58496	4.16993	4.24793	0	10.567	5.49185	0	8.65464	9.53138	4.85798	12.8744	4	3.70044	9.12412	10.8986	3.32193	1.58496
CHRM3	-1.24904	9.30137	-3.65349	0.000292561	0.0011741	-0.428195	DOWN	3.90689	9.47573	6.50779	10.2276	12.7442	11.6041	9.21189	8.17493	11.776	5.49185	6.79442	10.4168	11.0437	9.56605	11.5864	7.96	8.74819	8.89785	11.4691	7.75489	9.43879	10.0821	5.64386	13.0175	9.45738	9.10066	8.43463	7.59246	2.32193	10.0553	11.4252	9.98299	10.0715	10.3934	6.78136	11.6087	8.12928	8.98014	9.06609	9.95128	8.87652	6.39232
CHRM4	-1.73385	4.21688	-5.72691	1.99115e-08	2.17706e-07	8.71093	DOWN	3.70044	9.61655	2.58496	4.08746	6.42626	4.80735	4.39232	4	2	3.58496	3.45943	3.58496	4.64386	6.72792	5	7.54689	3.58496	2	4.58496	3.32193	2	2.58496	4.24793	7.75489	2.80735	4.64386	3.80735	3.58496	4	10.4429	4.90689	4.32193	1.58496	4	5.70044	4.52356	4.16993	3.70044	3.90689	2.58496	3.45943	2.80735
CHRNA1	2.84924	5.33556	10.0586	2.1094e-21	2.77919e-19	37.8793	UP	6.98868	5.78136	4.45943	7.01123	2.58496	7.82018	4.52356	4.45943	6.89482	5.2854	7.82655	6.37504	5.75489	7.04439	3.70044	6.2854	6.50779	3.90689	3.45943	7.36632	2.80735	9.54882	4.9542	5.2854	6.42626	5.67243	3.80735	4.16993	5.45943	7.39232	4.80735	7.12928	5.45943	6.44294	4.90689	5.52356	5.58496	6.08746	4.85798	4.24793	6.83289	6.78136
CHRNA4	-1.08955	2.15034	-3.41122	0.000711502	0.00258098	-1.25278	DOWN	0	0	0	2.58496	2.58496	1	3.90689	3.80735	2	2.32193	2.80735	1.58496	2	4.39232	1	2	3.58496	2	0	2.32193	3.16993	3	0	8.71425	2.32193	1	0	1	2	1.58496	2.32193	1	0	8.17991	4.52356	1	4	5.78136	1	5.08746	1	2
CHRNA5	1.16505	7.67149	5.83291	1.11249e-08	1.28252e-07	9.27293	UP	8.12928	9.3966	6.89482	8.20457	8.72792	7.47573	8.18488	7.01123	9.45121	8.91886	7.33985	8.30834	7.44294	8.87036	8.97441	8.86728	7.55459	8.43463	8.78463	7.42626	6.90689	7.3837	7.22882	8.51964	8.81698	7.44294	7.63662	6.26679	9.83447	9.08746	8.56986	7.59991	9.47776	9.34873	7.17991	7.70736	9.00562	7.2854	6.55459	6.2854	7.76155	7.79442
CHRNA6	1.42045	3.28534	6.38977	4.55503e-10	7.02377e-09	12.3663	UP	1	2.80735	2.80735	5.20945	1	2.80735	6.02237	3	3	1.58496	3.90689	1.58496	2.58496	4.52356	4.64386	4.58496	6.49185	3	3.90689	0	2.32193	5.70044	2.32193	3.45943	3.16993	3.70044	1.58496	1.58496	3.32193	4	5.45943	4.70044	1	1.58496	3.16993	4.08746	4	6.83289	3.45943	5	2.58496	4.39232
CHRNA7	-1.14452	6.44285	-3.34922	0.000886032	0.00313836	-1.45524	DOWN	6.37504	8.70044	5.45943	7.44294	5.97728	7.25739	8.30378	5.20945	7.66534	5.24793	8.58496	6.37504	6.71425	10.0014	5.78136	10.2396	5.61471	7.98299	4.16993	8.07146	4.24793	6.12928	8.00562	7.87036	10.3955	7.01123	2.32193	5.24793	5.08746	5.52356	4.39232	7.40939	5.83289	8.20457	6.65821	6.12928	6.33985	5.49185	4.80735	4.52356	8.58871	7.65821
CHST1	1.32033	8.34269	7.08414	6.20585e-12	1.3778e-10	16.5418	UP	7.69349	10.2095	8.24317	9.43671	7.62205	8.93958	10.2923	6.97728	9.44501	6.62936	8.37504	7.78136	7.82018	8.10329	9.86728	6.42626	8.67948	6.83289	6.18982	6.91886	6.30378	8.32193	9.2854	9.61839	8.16491	8.0607	6.30378	5.58496	9.97154	10.3641	10.5018	8.46352	9.25974	9.74819	8.15987	8.75154	7.04439	6.78136	9.95855	7.75489	11.6497	8.08746
CHST13	1.74976	6.53258	4.569	6.50843e-06	3.75666e-05	3.15875	UP	6.82018	6.85798	5.45943	11.4934	9.39232	10.3587	8.49586	5.83289	6.18982	5.12928	6.76818	4.9542	5.93074	5.90689	5.88264	3.70044	8.44294	8.56224	4.90689	8.633	7.18982	3.80735	4.08746	10.6357	6.74147	10.1085	5.45943	5.12928	6.12928	7.67243	5.70044	6.02237	8.38802	5.93074	4.85798	4.75489	5.70044	8.62571	4.24793	4.9542	7.07682	6.44294
CHST4	2.03644	5.63943	4.20645	3.1939e-05	0.000159503	1.65062	UP	5.20945	3.32193	6.72792	8.2384	6.47573	5.2854	7.11894	4.64386	8.12412	6.16993	5.9542	9.21189	4.58496	8.08215	4.70044	9.97154	7.42626	2.58496	7.2854	0	8.63662	5.61471	4.58496	5	6.24793	8.52748	1.58496	7.42626	1.58496	2.32193	3.70044	9.25503	4.90689	6.87036	3.45943	6.62936	4.75489	6.93074	8.47168	4.24793	3.45943	5.08746
CHST8	-1.44473	3.47518	-4.89835	1.39758e-06	1.01828e-05	4.62587	DOWN	2	4.45943	1.58496	3.70044	1	3.16993	7.09803	2.58496	2.80735	0	6.79442	3.80735	2.58496	5.2854	4.75489	2.32193	6.35755	1.58496	3.80735	1.58496	3.90689	4.39232	2.32193	9.48985	1	3.32193	1.58496	3.70044	0	4.52356	4.58496	4	3.16993	7.94251	3.80735	5.88264	2.80735	6.2854	3.16993	4.24793	3.70044	4.70044
CHST9	-2.76058	4.03613	-5.44354	9.05111e-08	8.63741e-07	7.25171	DOWN	3.16993	0	0	8.88264	1	9.02514	4.52356	5.83289	2.58496	1	3.16993	4.85798	2.80735	4.64386	5.55459	2.58496	6.37504	10.0112	2	1	8.57365	2.58496	1	9.90689	0	9.3015	0	7	1	3.32193	6.2854	1.58496	3.70044	9.21917	3	6.58496	2.58496	5.64386	3.58496	5.88264	3	5.49185
CHSY3	1.39604	7.44075	8.05653	8.80719e-15	3.43863e-13	22.9404	UP	6.39232	8.17991	6.59991	9.75822	7.22882	9.45327	8.58871	4.64386	8.21917	6.67243	6.91886	7.90087	8.13443	7.9542	9.71596	6.42626	7.64386	6.24793	6.84549	6.40939	4.64386	6.44294	7.96578	7.2854	6.67243	7.2384	5.55459	4.39232	7.81378	9.1472	8.59991	7.71425	7.49985	9.08746	7.11894	7.93074	6.30378	6.08746	7.93074	7.22882	9.84392	7.19967
CHTF18	1.40152	9.93119	8.42092	6.48213e-16	3.27698e-14	25.4922	UP	9.7879	10.0607	9.04166	10.8549	10.9708	12.2375	10.2491	8.33539	10.3399	11.0133	9.57175	10.032	9.92481	10.8218	8.64746	9.01123	10.6175	9.62571	10.9766	11.5541	7.98299	10.3049	10.4126	12.4445	10.825	10.9388	9.3837	7.22882	10.825	11.1731	9.93074	11.914	9.98726	9.95128	11.8368	8.22882	11.1662	10.5088	10.1849	7.29462	9.92035	9.77972
CIDEA	-3.95498	2.1529	-10.8192	3.81166e-24	9.22475e-22	44.0832	DOWN	1.58496	1	0	4.16993	0	1.58496	4.45943	2	0	0	7.19967	0	1	1	9.17742	1.58496	5.67243	0	3.58496	0	1	5.08746	0	2.58496	0	1	0	2.80735	0	3.16993	4.75489	1.58496	2.80735	1.58496	2	2	1	6.55459	0	3	1.58496	1
CIDEB	-1.36761	4.08882	-5.09851	5.25811e-07	4.22879e-06	5.5617	DOWN	3.45943	6.06609	3.16993	4.58496	0	3.58496	6.14975	3.16993	4.52356	5.45943	4.64386	6.08746	3.58496	5.97728	4.39232	2.80735	4.08746	1.58496	2	4.39232	3.16993	2.80735	1.58496	4.80735	5.49185	2	2.58496	5.04439	3.45943	4.70044	4.32193	4.39232	6.70044	4.16993	3.45943	4.75489	5.12928	0	4	3	4	5.08746
CIDEC	-2.56258	6.58734	-5.43439	9.49483e-08	9.01256e-07	7.20565	DOWN	7.32193	6.12928	0	9.15735	5.55459	10.0279	6.83289	4.85798	6.75489	4.45943	8.68299	6.32193	2.58496	6.83289	10.5765	3.90689	6.24793	8.07682	5.35755	4.64386	7.09803	5.97728	11.0154	5.97728	8.08746	7.82655	10.5177	4.85798	1	6.83289	5.35755	8.08215	5.88264	5.12928	11.1599	3.90689	8.66888	7.93664	8.51175	3.58496	4.16993	7.63662
CILP	-1.76954	8.22277	-3.83781	0.000143888	0.000622155	0.2346	DOWN	3.90689	9.61102	9.13955	8.21917	4	9.81218	8.30378	4.75489	10.4696	6.89482	11.272	7.20945	7.87652	11.8005	11.6266	4.9542	9.45121	2	4	3.32193	7.65105	8.20945	5.39232	10.0634	5.32193	4.16993	1	7.47573	5.39232	10.5216	11.1812	8.61839	8.00562	9.783	7.25739	9.08746	5.80735	7.56986	10.3912	7.15987	6.42626	6.30378
CILP2	2.63328	6.80275	7.33043	1.24919e-12	3.19066e-11	18.1035	UP	4.85798	6.10852	4.16993	7.90689	7.56224	6.52356	11.8906	4.80735	6.40939	3.45943	7.67948	3.45943	6.44294	6.24793	8.93369	3.80735	5.85798	5.04439	5.88264	4.90689	6.16993	8.16993	4.39232	8.83289	5.52356	7.55459	5.9542	4.32193	5.45943	9.55267	9.28771	5.24793	7.27612	7.50779	7.2854	7.67948	8.98014	6.08746	9.50383	5.55459	9.53916	5.04439
CIP2A	1.77729	9.40223	11.4624	1.5072e-26	6.12283e-24	49.522	UP	10.0182	9.87344	9.96578	10.4696	10.7074	11.5088	9.25739	7.40088	10.3955	9.39017	7.8392	9.77643	10.4168	9.93221	8.51175	9.31515	8.85175	9.77314	11.0189	10.1886	8.64386	8.67948	10.2456	10.444	10.1267	10.3998	9.60363	7.56986	11.4257	10.0941	10.2912	10.0566	8.96	9.50581	10.2276	8.33092	10.6357	9.86573	8.56986	7.33092	9.01681	9.18735
CIT	1.12669	10.7785	8.3002	1.55203e-15	7.21545e-14	24.638	UP	9.98584	11.1111	10.9388	11.6773	11.5774	11.8929	10.9894	9.63662	11.3767	11.4152	9.38154	10.4062	12.2958	11.6773	9.64746	10.5689	11.0775	10.4757	11.9915	11.3767	9.25267	11.0721	12.3775	11.8301	10.5401	11.188	11.4984	9.03892	12.6726	11.2842	10.4979	11.9337	10.1762	10.5008	11.2216	9.30378	12.4242	11.1079	9.74987	8.90689	12.6436	10.7499
CITED2	-1.66296	11.3653	-11.5471	7.18751e-27	3.31441e-24	50.2501	DOWN	11.3939	11.3106	10.7814	11.7805	10.8494	12.2423	12.4803	10.032	11.0396	10.6129	11.5211	11.6957	11.2527	12.275	12.6931	10.5981	10.6466	10.5167	10.733	11.4873	10.1972	10.8925	10.7507	12.1335	11.7185	10.9054	11.2963	9.57554	10.3343	12.3306	11.3242	11.0334	11.3729	12.0165	10.8258	12.6434	11.66	8.25739	10.1202	10.821	11.9491	11.0573
CKAP2	1.53503	11.3121	9.76013	2.33872e-20	2.58273e-18	35.518	UP	11.6869	11.8258	10.0941	12.006	13.2581	12.8599	11.03	8.42206	12.6298	11.1935	10.5177	11.6587	12.809	12.2615	10.2597	12.42	10.5167	11.0341	12.7678	12.6257	9.73471	10.9337	12.7628	14.497	12.5457	11.0049	11.7879	8.97441	12.9906	11.8404	11.318	11.7104	11.4843	11.8376	10.567	10.4522	12.1892	11.0238	9.87652	9.60733	11.2831	12.1212
CKAP2L	2.27624	9.49471	11.403	2.5302e-26	9.59341e-24	49.0126	UP	9.07146	10.4189	9.21189	10.8305	9.72962	10.3026	9.42206	6.98868	10.8098	10.0307	7.56986	10.2252	10.1972	10.5459	7.90087	10.1536	9.70044	9.53528	10.8719	10.792	8.12412	9.03617	10.0715	11.527	10.6636	9.66888	9.95855	8.18488	11.9211	11.2192	9.52748	10.375	10.2228	10.6339	11.3945	7.29462	10.3129	9.95565	8.52356	6.93074	9.88264	9.57175
CKB	-2.53217	11.9384	-7.93096	2.12456e-14	7.56769e-13	22.0799	DOWN	9.65464	12.914	10.1137	14.6374	11.796	14.633	9.04439	11.69	11.0921	11.783	11.1491	14.6912	10.5333	11.7305	14.9913	9.51373	12.0192	10.5765	13.3464	13.7231	11.5943	12.0369	10.4284	13.9693	11.4574	11.9556	12.2961	10.8971	5.72792	12.1706	13.236	10.6366	11.6138	13.6278	10.8657	15.7319	11.4184	12.5302	12.3228	13.0987	10.021	9.13699
CKM	-2.06026	4.12834	-6.73082	5.75972e-11	1.07637e-09	14.3742	DOWN	3.16993	6.56986	3.45943	5.39232	6.87036	2.80735	4.70044	4.39232	3.16993	1	2.58496	1.58496	2.58496	3.32193	3.45943	4.24793	6.37504	1	4.08746	3.90689	7.11894	5.04439	3.32193	4.80735	3.45943	6.12928	1	7.02237	4.16993	3.45943	7.17991	2	6.10852	5.70044	2.32193	5.24793	2.32193	7.07682	3.45943	3.70044	6.90689	2.80735
CKMT2	-3.00877	6.16943	-12.4592	2.10424e-30	1.99459e-27	58.2526	DOWN	4	5.61471	3.32193	6.18982	5.61471	6.10852	6.79442	8.26679	6.84549	3.16993	5.24793	6.76818	5.32193	9.95855	7.69349	5	6.26679	4.85798	9.24793	4.24793	6.10852	6.61471	5.08746	6.08746	5.55459	5.64386	4.80735	5.58496	5	6.71425	7.08746	7.06609	5.20945	5.93074	4.58496	8.86728	6.53916	6.10852	5.45943	6.52356	6.85798	4.64386
CKS2	1.72631	11.1677	8.77626	4.72345e-17	2.89898e-15	28.0562	UP	11.944	11.7748	11.3134	11.3231	12.6948	12.8813	10.0307	11.3168	11.8846	11.647	11.1774	12.0406	11.3669	11.5142	10.1007	11.3945	10.5953	11.1402	12.354	12.5486	11.0808	11.8788	10.6357	10.2033	12.7108	11.9912	12.1261	9.57365	13.0706	11.9733	10.0375	12.7934	11.7536	11.8541	12.4891	9.80413	11.9237	11.3208	10.8834	9.6987	10.6092	11.0286
CLC	-1.0959	3.47917	-2.259	0.0244127	0.0565334	-4.43208	DOWN	3.16993	9.70217	1.58496	6.12928	0	5.67243	1	1.58496	3.70044	5.35755	6.85798	1	4.08746	8.41785	3.58496	6.06609	3.16993	1	0	0	2.58496	3.90689	1	5.78136	1.58496	3.16993	0	3	4.24793	2.58496	2	2.32193	0	8.3966	3	1.58496	6.06609	3.70044	0	4	4.16993	5.04439
CLCA1	-3.26012	4.55442	-4.58322	6.10133e-06	3.54205e-05	3.22019	DOWN	0	5.42626	0	6.16993	3.16993	6.22882	7.11894	5.35755	1	4.39232	5.12928	0	4.16993	10.352	6.35755	15.7327	4.80735	8.26679	7.78136	1	7.11894	6.20945	1	4.32193	1.58496	4.58496	5.67243	2.32193	2.32193	5.75489	5.08746	1	2.32193	9.56415	9.56224	3.45943	8.17493	6.79442	2	4.70044	10.3794	9.21917
CLCA2	-1.29352	3.53947	-2.33276	0.020148	0.0480186	-4.26602	DOWN	1	3.32193	1	4.52356	2	4.39232	2	10.014	2.58496	0	3.16993	8.65464	1.58496	1	8.15987	4.90689	5.75489	0	6.52356	1	0	4.90689	2.32193	3.70044	2.80735	2	9.88417	12.4959	0	2.32193	2.80735	0	4.52356	2	3.70044	4.32193	2	6	2.58496	3.70044	5.58496	2
CLCA4	-1.67822	4.00403	-2.88935	0.00406698	0.0120449	-2.84652	DOWN	1	2	1.58496	2.80735	5.49185	3.32193	3.45943	10.0279	6.9542	2	2.80735	4.9542	5.08746	3.80735	0	5.61471	4.16993	1	5.49185	1	5.2854	4.08746	1.58496	2.32193	7.03342	0	3.70044	12.3559	0	14.3697	3	8.633	2.32193	3	2.58496	1	3.90689	4.9542	2.80735	3.58496	4.16993	7.53916
CLCN2	1.04816	9.76733	5.55774	4.9533e-08	5.01116e-07	7.83218	UP	8.41363	8.95128	9.24079	10.4147	12.6182	12.3883	9.93811	8.08746	11.1911	10.1737	9.26209	9.62753	9.93958	10.4051	8.04985	9.13443	10.9816	10.6917	11.4993	10.6742	9.54689	9.69349	10.0701	11.2709	10.1447	9.58496	9.87344	6.78136	11.2088	11.8971	10.2143	10.4818	9.35755	8.73809	11.056	8.26209	11.2318	10.703	10.4126	7.67948	8.40088	10.8564
CLCN4	1.32575	9.2855	5.31046	1.80394e-07	1.60683e-06	6.58848	UP	9.3015	12.2998	9.69174	10.0715	10.0848	11.1948	10.4315	7.60733	11.2174	9.5216	8.32643	10.1523	12.5599	9.51373	9.24793	9.41785	9.03342	9.68124	7.96	8.85175	6.97728	9.94691	11.3393	11.817	9.30606	5.67243	9.8009	7.24793	13.9679	8.70044	10.8696	6.39232	9.17493	7.63662	7.99435	8.43879	9.10852	8.50383	9.77314	6.35755	8	10.021
CLCN5	1.16923	10.3214	7.50936	3.80136e-13	1.07362e-11	19.2638	UP	9.73132	10.0553	10.3309	10.4949	9.98299	11.7245	11.2438	7.97728	11.7069	9.7039	9.28771	9.05799	10.3498	10.8603	10.0028	12.2088	10.2384	10.3815	9.55842	10.3343	8.47978	9.63118	12.5367	12.0918	10.4878	10.3004	9.53528	7.99435	12.9906	10.4336	9.90689	10.543	9.75656	10.9359	11.2282	9.31061	11.29	10.0485	9.5157	9.3837	11.3332	10.5469
CLCNKA	-2.11232	3.43733	-6.26776	9.35443e-10	1.34574e-08	11.6686	DOWN	2	5.52356	0	3.32193	4.45943	5.97728	4.58496	2	4.75489	0	0	1.58496	2	3.16993	4.80735	2.58496	5.08746	4.70044	1.58496	2.80735	3.80735	4.24793	4.85798	4.24793	0	6.85798	0	4.16993	0	4.70044	5.80735	1.58496	0	6.62936	2.58496	4.39232	2.80735	5.83289	5.85798	3.90689	5	3.58496
CLDN1	3.30375	11.6734	10.9892	8.9764e-25	2.49033e-22	45.5043	UP	11.7168	9.41363	13.5939	13.2546	12.1459	14.446	12.69	9.52943	14.5583	10.9636	9.69697	13.129	11.1085	11.9185	12.6334	12.3485	13.3188	13.3045	13.4804	11.5358	11.2568	8.70044	12.9805	11.9133	7.49985	11.5803	13.3019	11.0314	4.45943	13.8482	13.795	12.137	9.87344	11.4152	11.2842	11.242	12.896	12.2653	12.7773	10.7715	10.4909	12.1646
CLDN10	-2.02754	3.86445	-4.19694	3.32517e-05	0.000165438	1.61257	DOWN	1	3.45943	0	4.52356	3.16993	6.76818	4.85798	6.32193	4.32193	3.90689	3.90689	2	0	4.39232	6.67243	1	5.16993	0	2	0	8.96867	5.42626	2	3.16993	3.32193	5.58496	0	8.73809	0	3.58496	3.90689	2	4.32193	12.6863	5.08746	5.83289	4.32193	5.61471	9.05799	4.16993	3.45943	2
CLDN14	1.46154	4.70947	5.48545	7.26334e-08	7.07953e-07	7.46352	UP	5.45943	4.16993	7.3837	6.18982	2	3	4.32193	2.32193	5.08746	2	3	3.80735	5.52356	4	5.93074	3.45943	5.16993	3.32193	3.16993	2.80735	3.80735	4.70044	8.16993	6.04439	5.61471	3.45943	5.49185	4	5.55459	6.16993	7.34873	6.16993	6.47573	5.08746	4.58496	5.20945	4.32193	6.39232	5.20945	3.90689	8.21917	5.70044
CLDN16	2.11573	5.06983	6.71537	6.33633e-11	1.17257e-09	14.2815	UP	3.80735	2.58496	6.65821	7.18982	7.11894	7.49185	6.80735	3.58496	8.28077	5.49185	5.49185	5.55459	3.16993	6.02237	4.45943	6.18982	7.7879	5.88264	5.20945	3.58496	5.08746	4.32193	3	5	3.80735	4.9542	6.64386	4.80735	2.32193	6.2854	5.64386	6.50779	2.58496	2.80735	4.52356	6.24793	6.87036	5.39232	5.2854	5.9542	3.16993	4.90689
CLDN17	-1.39557	0.426407	-5.54914	5.18537e-08	5.21964e-07	7.78807	DOWN	0	0	0	2	0	0	1	0	0	0	0	0	0	0	0	0	4.16993	0	0	0	0	1.58496	0	0	0	0	1	1	0	0	0	0	0	0	0	0	0	4.45943	0	0	0	0
CLDN2	2.84278	10.2919	5.375	1.29336e-07	1.18929e-06	6.90833	UP	11.527	11.703	12.2518	8.43463	6.94251	9.01959	10.2408	10.2009	13.907	8.13443	6.37504	8.42206	7.85798	13.0018	12.8114	13.3844	12.2597	10.3095	15.9896	7.80735	9.70736	8.94544	14.9008	8.29462	9.97011	3	12.7394	8.92778	6.9542	10.275	8.84235	9.69523	11.0458	13.882	10.2252	10.9359	13.6211	13.3569	13.3846	8.84549	6.59991	10.4757
CLDN3	3.60436	11.7451	7.13497	4.4727e-12	1.02023e-10	16.8607	UP	5.12928	14.5161	7.2384	13.0845	15.1301	15.8522	11.1567	9.59619	13.4589	13.8908	13.8604	13.0588	13.9281	13.891	8.54689	13.7561	8.04439	11.4671	13.8681	14.1932	11.3875	14.0183	11.2998	13.1115	14.0408	13.4244	14.0026	10.7838	11.6008	16.4943	12.5384	15.079	13.9136	13.7714	13.6588	8.94251	13.3252	13.1507	14.6407	10.6582	13.5378	12.461
CLDN4	2.62658	14.1415	9.32708	7.09472e-19	6.06135e-17	32.1706	UP	14.5456	13.5459	14.4332	15.2834	15.3212	16.6884	13.83	11.2461	15.3327	16.0775	14.4429	15.6238	16.0928	15.087	11.7793	14.6896	15.2333	14.2731	14.6395	14.1293	13.4029	14.2125	16.9126	14.5977	15.2791	14.0265	15.4222	13.3464	12.2387	17.2785	15.3333	15.983	14.2269	15.0072	16.4123	11.4548	15.2696	14.1798	14.9614	11.286	14.1313	14.8819
CLDN5	-1.84524	9.65191	-7.92765	2.17415e-14	7.73624e-13	22.0573	DOWN	8.25739	10.7364	8.13443	9.15987	8.88264	10.4263	11.1131	8.74819	10.23	8.12928	12.3655	9.35535	8.41785	9.99718	11.7121	5.97728	10.7194	7.10852	7.26679	7.45121	10.1059	9.51175	9.48985	8.97441	8.36194	8.60733	7.31288	9.45738	9.33092	10.6036	10.7624	8.00562	10.2819	9.22641	9.25739	11.2644	8.69697	7.88264	11.0028	9.08481	11.5459	9.46148
CLDN6	2.19735	4.24613	3.68943	0.000255334	0.00103863	-0.301355	UP	3	3.45943	1.58496	12.2665	2.32193	10.1649	2.58496	7.52356	1	2.32193	3.32193	1.58496	2.32193	4.75489	1	5.64386	5.08746	6.94251	3	3.16993	4.08746	2.32193	3	7.22882	2.32193	12.2125	1.58496	10.8819	1.58496	2.32193	7.56986	3.32193	13.0184	1	4.90689	1	3.16993	5.45943	11.911	1.58496	2	5.67243
CLDN7	2.32277	12.9297	9.74392	2.66197e-20	2.91145e-18	35.3909	UP	13.1704	13.9046	13.0941	13.9644	13.6243	15.3048	11.6216	11.4221	14.2937	13.7118	13.378	13.6884	14.177	13.4148	10.676	13.6784	12.3883	14.3953	14.2967	13.5605	12.5127	12.2387	13.6162	13.5078	15.087	14.0463	14.0861	11.5661	14.1246	14.0365	12.5209	14.2988	13.5713	13.9737	13.8493	10.9462	13.9661	13.1116	14.3445	11.0362	11.842	13.4372
CLDN9	1.66464	5.37492	4.2441	2.72136e-05	0.000137949	1.80193	UP	5.78136	7.72792	4.52356	4.9542	3.70044	5.42626	6.49185	3.45943	2.58496	4.90689	5	5.24793	2.58496	7.45943	2.80735	4.90689	7.52356	8.32643	6.89482	4.85798	4.39232	3.32193	6.88264	10.0593	6.20945	5.32193	5.58496	6.47573	3.45943	6.88264	7.45121	4.70044	12.2764	7.17991	5.20945	3.32193	4.16993	7.18982	10.1624	4.08746	4.32193	4.90689
CLEC10A	-1.82598	7.24927	-5.92428	6.69e-09	8.06108e-08	9.76435	DOWN	7.65821	9.17991	8.88264	7.20945	4.08746	7.44294	10.128	5.04439	6.55459	6.72792	9.224	5.42626	6.06609	8.83605	10.0334	7.20945	8.28077	4.90689	3.80735	2.58496	6.70044	6.33985	3	6.37504	4.64386	7.24793	7.85798	6.35755	7.25739	7.9542	6.82018	6.26679	5.93074	6.67243	6.75489	7.17991	7.09803	6.88264	6.55459	7.37504	6.50779	7.26679
CLEC20A	-1.05353	0.794374	-4.98796	9.05807e-07	6.8872e-06	5.04072	DOWN	0	0	0	0	0	0	0	4.39232	0	2	0	1	0	3	0	0	1.58496	1	1.58496	0	3	0	2	0	2	0	0	0	0	0	0	0	0	1.58496	3	1	1	2.32193	0	1	0	0
CLEC3A	-2.10859	1.78126	-6.63905	1.01286e-10	1.77976e-09	13.8257	DOWN	1	1	1	2.80735	2.32193	2.58496	2.58496	0	0	1	0	4.64386	1	0	1	3.16993	4.90689	2	3.58496	1	0	4.85798	0	8.12412	0	1	0	0	0	3.90689	0	1.58496	3	2.58496	3.45943	7.04439	1.58496	5.64386	2.32193	2.32193	2	1
CLEC3B	-3.59929	7.56338	-14.8434	3.91357e-40	4.45156e-36	80.3023	DOWN	6.42626	6.52356	5.67243	7.33985	5	9.3966	8.54303	6.65821	8.69697	7.81378	10.6393	5.55459	5.49185	8.75822	10.2889	5.16993	7	6.59991	4.90689	6.08746	7.15987	6.61471	6.16993	6.93074	6.55459	6.08746	6.78136	7.12928	4.85798	8.72451	8.55842	5.9542	7.59246	5.9542	8.73471	9.78953	5.39232	5.52356	7.7211	7.45943	7.74147	8.93664
CLEC4G	-1.62583	3.2928	-5.47672	7.60455e-08	7.38678e-07	7.41932	DOWN	4.75489	5.67243	1	4.32193	0	5.39232	6.32193	0	4.08746	2.32193	5.45943	3.32193	2.80735	3.16993	8.90689	1.58496	5.93074	1.58496	1.58496	1	1.58496	3.32193	0	4.64386	1	3.90689	2.32193	1	2.32193	4.70044	2.32193	2.80735	2.80735	3.90689	2.32193	1.58496	2.58496	6.30378	2.80735	3.58496	4.90689	3.45943
CLEC5A	2.31393	6.84707	8.27141	1.90897e-15	8.72043e-14	24.4355	UP	6.96578	9.27612	6.56986	9.35755	4.80735	6.79442	5.20945	4.16993	7.57743	5.67243	5	8.29462	9.07414	6.88264	7.13955	8.31741	6.6865	4.90689	5.75489	5.83289	5.20945	7.11894	7.07682	5.52356	7.43463	8.25267	6.16993	5.2854	9.97154	8.08215	7.86419	8.49586	6.58496	10.4737	6.2854	6.02237	7.09803	6.50779	9.46964	6.06609	11.1286	7.76155
CLEC9A	-1.22004	3.87875	-4.53735	7.51035e-06	4.26925e-05	3.02259	DOWN	5.35755	4	5.78136	4.85798	2.32193	1	8.16491	1	2.32193	2.32193	5.52356	2	2	5.08746	5.16993	4.80735	5.08746	3	2.80735	1.58496	3.90689	2.80735	1	2.80735	2	3.90689	3.32193	2.32193	2.32193	4	3.80735	4.08746	1.58496	4.24793	4.45943	4.39232	3.32193	4.85798	4.32193	4	4.75489	5.70044
CLGN	-1.35666	5.7095	-3.84899	0.0001377	0.000597671	0.275767	DOWN	2	9.65821	4.39232	6.55459	4.52356	5.83289	6.62936	5.08746	5.9542	5.61471	3.32193	8.47168	7.12928	4.70044	8.93664	3.32193	6.06609	5.2854	5.24793	2.32193	5.42626	7	3	6.62936	3.70044	7.50779	2	4.70044	3.45943	6.22882	6.06609	3.16993	6.12928	11.0782	3.32193	7.84549	4.52356	6.32193	5.39232	6.12928	4.9542	7.27612
CLIP3	-1.42822	10.3408	-5.87239	8.93699e-09	1.05342e-07	9.48449	DOWN	9.05799	11.3778	9.85953	11.021	8.36632	10.0674	12.1108	7.97728	10.6715	7.53138	10.3966	11.8819	9.83131	10.7296	13.5569	8.35755	10.1849	8.19476	9.29692	8.16491	8.6865	10.7632	9.80252	9.47573	8.08215	9.20457	8.69	8.7039	8.53916	12.0403	10.6804	9.81538	10.4959	11.2544	9.57932	13.9314	8.9571	8.32643	11.0056	12.263	11.933	9.633
CLIP4	-1.17315	9.49279	-5.33759	1.5691e-07	1.41613e-06	6.72252	DOWN	8.67596	9.01681	8.19476	9.46352	9.28077	11.2456	10.8819	8.08746	9.27845	5.58496	8.93958	10.1408	8.10329	9.93074	12.2479	7.53916	9.17742	8.31741	7.15987	5.49185	9.15228	10.1459	11.2174	7.56224	7.16993	9.02514	8.33092	9.14975	8.93664	10.4273	9.53916	8.44294	8.31741	10.5575	9.3837	12.5929	8.98868	9.03342	9.64746	10.1396	9.87498	8.86109
CLMP	-1.43416	9.96012	-5.14164	4.24168e-07	3.47272e-06	5.76766	DOWN	6.89482	10.4221	9.06878	11.7368	7.25739	10.3685	10.6466	7.13955	10.6475	7.03342	10.275	11.2814	10.7056	10.5343	14.2496	7.59991	9.47573	5.80735	8.84549	7.19967	8.67243	9.78953	8.54303	8.17493	8.43879	8.74819	6.90689	7.67948	9.85175	10.9744	9.26679	10.6156	8.61102	11.5118	8.92778	13.0546	9.0954	7.82655	9.81057	11.9589	13.7212	9.9542
CLPS	-1.39447	2.28672	-3.39353	0.000757735	0.00272666	-1.31093	DOWN	0	4.08746	1	4.32193	3.70044	3.45943	2	8.61102	2	0	5.04439	0	1	1	0	3.16993	5.42626	3.70044	2.58496	0	2.58496	4.08746	0	10.8009	2.32193	2.80735	4.39232	4.70044	0	0	3.58496	0	1.58496	2	2.80735	0	1.58496	6.82018	0	1	1.58496	1.58496
CLPSL1	1.15314	2.23127	3.04316	0.00249303	0.00782848	-2.40297	UP	0	3.45943	0	5	6.20945	6.20945	1.58496	7.10852	1	0	2	0	0	1	0	3.80735	4.70044	4.58496	2.80735	0	5.55459	4.85798	0	5.16993	3.80735	5.04439	4.24793	0	1	0	2.32193	0	4.39232	4.52356	2.80735	2.32193	1.58496	6.52356	2	0	2	2
CLPSL2	1.19675	1.60158	3.81777	0.00015565	0.000667681	0.161044	UP	1	5.2854	0	4.58496	3.32193	4.39232	1.58496	0	1.58496	0	1.58496	0	2.58496	0	0	3	4.08746	2.32193	1	2	2.32193	4.08746	0	6.10852	3.45943	5.16993	3.58496	0	0	2	4.24793	2	1.58496	4.52356	0	0	0	3.80735	1.58496	2.32193	1	1
CLRN3	2.87015	8.99814	6.38021	4.82112e-10	7.37409e-09	12.3112	UP	4.80735	9.32418	7.75489	10.6874	12.3625	11.6582	10.1911	6.6865	11.3939	9.93958	9.94983	10.568	4.24793	10.2527	6.83289	11.1267	6.55459	10.5981	10.3376	10.3015	8.49985	10.722	10.2396	11.5722	12.0678	10.2831	11.7087	6.39232	11.568	11.151	3	10.7356	9.18982	8.8009	11.3332	9.43254	10.6393	9.80735	10.2155	8.09276	9.77479	9.64566
CLSPN	2.70203	9.50389	13.9971	1.3037e-36	5.56094e-33	72.3191	UP	9.04439	9.81538	9.77314	11.3129	10.6193	10.3509	9.64024	7.80735	10.2058	9.51175	8.41363	10.2444	10.2276	10.3641	8.69697	8.77479	9.95128	9.81698	11.0627	10.3163	8.61102	10.3343	10.4325	10.8313	10.4168	10.6804	9.13186	7.90087	11.4702	10.0888	9.78953	11.3231	8.8857	10.9159	10.5878	7.36632	11.0895	9.93811	9.04712	6.93074	10.021	9.30378
CLSTN2	-1.04947	8.12509	-3.98961	7.84945e-05	0.000359006	0.80319	DOWN	8.47168	10.4378	6.04439	9.38154	11.8646	8.62205	10.5226	6.37504	7.70736	6.65821	7.84549	7.20945	7.42626	8.85798	8.55842	7.40088	8.09276	5.64386	7.81378	6.91886	7.16993	5.32193	7.50779	9.57932	7.36632	7.78136	6.79442	7.02237	7.8392	10.6457	9.21432	7.30378	7.03342	9.0634	7.9542	8.76487	7.35755	7.33985	6.84549	6.49185	9.70217	7.10852
CLU	-1.58336	13.5438	-4.70529	3.48058e-06	2.33532e-05	3.75476	DOWN	12.3606	13.9913	13.229	13.8063	12.7952	14.0244	15.6744	13.691	12.0771	13.6794	15.5617	14.3417	11.9762	15.4738	16.7902	10.1485	14.5888	14.6115	9.87344	10.8857	14.7935	13.0439	12.2243	12.8469	10.6221	15.1547	11.5901	13.9265	8.40939	13.673	16.1187	13.4232	15.0973	14.126	14.0339	16.3275	14.8103	10.8154	14.4537	14.7117	12.6775	13.6415
CLVS2	-1.78864	2.50875	-4.05171	6.09201e-05	0.000286223	1.04163	DOWN	0	0	1	5.85798	7.17991	1	0	1	2.58496	0	0	5.35755	2	2.58496	8.56605	2	5.72792	0	2	1	3.45943	5.52356	0	2	0	4.9542	1.58496	1	8.0607	2.80735	2.80735	1	2	4.52356	2.80735	7.70044	0	5.35755	4.16993	8.49985	1	1
CMA1	-3.46686	3.05594	-9.36142	5.4317e-19	4.70435e-17	32.4326	DOWN	1	4.75489	2.32193	5.35755	2.58496	5.9542	7.02237	0	1	1.58496	6	4.58496	4.16993	3.80735	7.91289	2	2.32193	1	0	0	3.58496	3.90689	2.32193	4.08746	2.58496	2	1.58496	5.04439	0	5.72792	3.90689	1	2.80735	3.16993	2	3.58496	1	0	3	2	2.58496	1
CMC4	-1.15526	2.02146	-4.99997	8.54236e-07	6.53733e-06	5.09683	DOWN	0	2.58496	1.58496	3.16993	1.58496	1	3	0	2.32193	1	2.58496	0	1	1.58496	4.16993	2	2.32193	1	1.58496	1	2.80735	0	1	3.32193	1.58496	1.58496	1	1.58496	1.58496	3.70044	3	1.58496	2	0	1	4.80735	2	0	2.32193	2.32193	0	0
CMTM1	1.08115	6.65312	6.739	5.47534e-11	1.02716e-09	14.4234	UP	7.47573	6.90689	6.44294	7.86419	7.20945	6.97728	8.38802	4.08746	6.39232	5.67243	5.12928	6.49185	7.57743	7.21917	6.50779	7.13955	7.29462	5.42626	6.59991	6.78136	5.49185	6.40939	8.40088	7.60733	6.33985	5.24793	6.2854	5.24793	8.07146	7.80735	6.84549	6.71425	5.39232	7.61471	5.39232	6.16993	7.76818	5.93074	4.52356	4.70044	7.2854	6.67243
CMTM5	-3.70028	2.34994	-12.4744	1.83251e-30	1.89492e-27	58.3887	DOWN	2	3.16993	0	2	1	1	3.58496	1	1	0	4.16993	4	1	2.58496	5.52356	1	2.80735	1	1	0	1.58496	1	1.58496	2.80735	1	0	0	2.32193	1	3.58496	4.64386	1	4	1	1	5	1.58496	4.52356	3.32193	4.64386	1.58496	3
CMTM7	1.01685	10.5458	5.38762	1.2114e-07	1.12087e-06	6.97129	UP	10.7339	11.0573	10.9388	10.2946	11.2033	11.6243	11.4157	10.151	10.875	11.2485	10.9129	10.3565	11.6843	10.3869	10.1561	9.47371	11.6987	11.1618	10.8154	8.8392	10.3815	10.6312	11.0954	8.3966	8.43879	10.1007	10.9549	9.54496	11.5275	11.3504	11.9887	10.2167	11.4803	11.2802	10.2912	10.2095	11.6795	9.76818	10.7985	8.91289	9.93221	10.4242
CNBD2	1.00299	4.62078	4.7726	2.54079e-06	1.75049e-05	4.05494	UP	4	4.9542	3.16993	6.44294	5.42626	5.75489	6.08746	2.80735	4.9542	4.90689	4	4.52356	3.16993	8.49586	4.39232	5.78136	8.01123	3.32193	5.64386	4	4.24793	8.44294	4.32193	6.44294	4.45943	4.58496	4.24793	2.80735	3.16993	6.83289	5.42626	3.80735	4.75489	4.08746	5.45943	4	5.16993	9.49985	4.32193	3.90689	4.52356	5.04439
CNGA1	-1.07469	6.83357	-4.14064	4.21366e-05	0.000204854	1.38904	DOWN	5.42626	4.58496	5.61471	6.49185	6.70044	9.0607	7.87036	5.49185	7.17991	4.45943	6.72792	6.49185	5.24793	7.90087	7.30378	8.62571	6.40939	7.13955	8.74483	5.64386	7.24793	6.30378	8.7039	8.0607	7.71425	5.58496	7.40939	6.9542	4.24793	6.06609	8.14975	7.33985	6.59991	5.35755	5.88264	7.45121	6.84549	8.77808	8.32193	6.26679	6.93074	6.96578
CNGA3	-2.09594	3.82864	-6.1863	1.50334e-09	2.05365e-08	11.209	DOWN	3.58496	4.90689	5.2854	4	1	2.32193	2.80735	3.70044	5.58496	0	2.32193	6.42626	5.85798	4.52356	4	1	6.84549	2.32193	4.08746	0	1.58496	4.45943	3.90689	4.32193	1	1	2.32193	4.08746	3.32193	5.85798	2	0	3.58496	4.70044	0	4.32193	3.16993	7.19967	3.58496	4.39232	3.32193	2.32193
CNGB3	1.13012	3.75279	3.56339	0.000409538	0.00158304	-0.741057	UP	0	5.58496	1	5.45943	5.55459	8.74483	5.04439	3.16993	5	3	1	1.58496	6.33985	3.45943	0	5	5.42626	5.72792	4.16993	2.32193	4.80735	7.7879	1.58496	6.12928	3.45943	5.75489	4.90689	3	3.70044	2.58496	6.76818	1.58496	5.08746	7.81378	5.12928	3.32193	4	8.20457	4.16993	4.9542	3.32193	3
CNKSR2	-2.21328	5.2827	-5.58088	4.37843e-08	4.48543e-07	7.95105	DOWN	2.80735	4.64386	5.72792	6.74147	1	4.39232	9.03067	3.70044	6.39232	0	6.62936	6.58496	3.70044	6.40939	11.0458	4.80735	7.35755	2	4.39232	1	3.58496	7	2	6.96578	2	2.80735	4.80735	3.80735	2.58496	7.33092	6.70044	4.64386	5.39232	5.35755	4.64386	10.1674	4.52356	6.37504	5.90689	9.65284	4.75489	5.20945
CNN1	-3.01621	11.7048	-6.66057	8.87759e-11	1.57863e-09	13.9538	DOWN	9.83763	12.204	10.9432	13.8558	8.02237	10.5774	9.30378	8.80735	13.4608	9.62571	11.3565	15.0263	10.3597	12.3058	18.2476	7.3837	10.9307	8.3837	9.80413	7.59991	10.6312	13.0069	10.1306	9.22641	8.98584	7.48382	9.84706	10.2562	9.65642	14.376	12.1988	10.42	13.3435	12.8473	11.014	18.9594	8.3443	8.91588	14.6598	16.8925	12.1215	10.2384
CNR1	-2.2026	6.58109	-5.08758	5.55088e-07	4.43914e-06	5.50976	DOWN	2.58496	5.61471	4.32193	10.1383	0	10.544	10.7582	3.32193	7.43463	2.58496	8.47978	7.64386	6.08746	8.26679	11.4645	3.32193	9.60177	6.89482	3.70044	2.32193	7.40939	5.55459	4.39232	5.61471	3	9.43463	3	5.75489	3.90689	7.20945	7.5157	6.24793	5.08746	7.52356	6.90689	10.1497	7.55459	5.70044	7.05528	10.0389	6.16993	8.02237
CNRIP1	-1.2595	8.86875	-7.34122	1.16338e-12	2.9849e-11	18.1729	DOWN	7.90087	9.39446	8.02791	9.58684	6.74147	8.85175	10.3015	6.65821	8.99435	6.88264	9.90238	9.00843	8.31741	9.13186	11.4388	7.12928	8.59991	7.01123	7.26679	7.67243	7.76155	8.55842	7.99435	7.96578	7.69349	7.63662	7.20945	7.49985	8.60733	9.72962	9.79116	8.31288	8.93664	10.0265	8.75154	10.6439	7.80735	7.62936	9.11374	9.20701	10.6786	8.56224
CNTFR	-3.6054	6.00526	-7.51347	3.69806e-13	1.04985e-11	19.2906	DOWN	2.80735	7.18982	2.32193	7.45121	13.7227	10.2969	7.55459	8.49586	3.45943	4.9542	9.05799	5.67243	2.58496	5.93074	8.82337	4.58496	4.75489	2.80735	0	8.84549	9.55267	4.16993	3.16993	11.7545	11.2467	6.35755	2.80735	4.80735	0	10.5028	5.2854	3.45943	3.45943	6.83289	5.55459	6.40939	5.24793	10	4.75489	5.20945	3.90689	4.45943
CNTN1	-2.735	7.28958	-6.14518	1.90663e-09	2.54744e-08	10.9788	DOWN	3.16993	12.2906	6.83289	8.44708	2.80735	8.74147	10.8564	5.39232	8.33092	2.58496	8.74147	9.88722	7.20945	7.2384	11.1592	4.39232	7.71425	2	6	1	6.18982	10.4325	3	9.10852	4.08746	2	6.37504	7.33092	5.32193	10.1611	7.88874	6.08746	8.89482	8.8857	5.64386	12.1643	5	7.15987	8.65821	9.87958	8.43879	5.24793
CNTN2	-1.92721	4.61127	-6.00394	4.27206e-09	5.33211e-08	10.198	DOWN	2	4.16993	1	6.18982	6.82018	5.32193	7.42626	1.58496	5.04439	2	6.08746	4.75489	3.70044	5.2854	8.41785	3.90689	7.5157	2.32193	5.08746	2.32193	3.58496	5.88264	4.32193	6.97728	1.58496	3	3	3.16993	1.58496	4.90689	5.24793	2.58496	3.16993	3.80735	4	7.61471	3.58496	7.87652	5.08746	5.64386	4.32193	3.90689
CNTN3	-1.91032	4.20183	-5.38096	1.25402e-07	1.15561e-06	6.93804	DOWN	3.16993	2.58496	3.90689	7.89482	0	3.16993	4.9542	5.20945	3.16993	1.58496	2.32193	5.04439	2	7.48382	4.64386	5.04439	6.16993	2.58496	4.45943	4.45943	4.45943	5.67243	3	1.58496	0	7.06609	4.32193	5.39232	3.32193	5.04439	2.80735	2	3.58496	9.04439	4.45943	6.61471	6.06609	5.90689	4.24793	5.32193	7.40088	2.32193
CNTNAP3	-1.27987	5.71471	-4.01341	7.12544e-05	0.000329165	0.894184	DOWN	1.58496	3.80735	4	6.42626	3.58496	6.20945	8.15482	4.24793	6.04439	5.64386	4.58496	4.39232	6.39232	6.42626	9.03342	3.90689	7.01123	5.2854	4.80735	1.58496	6.52356	6.10852	5.24793	4.75489	1	5.88264	5.9542	6.16993	5.42626	5.64386	6.44294	3.32193	5.42626	7.82655	6.6865	7.24793	5.61471	7.05528	5.90689	6.45943	8.06609	6.04439
CNTNAP3B	-1.15932	5.13824	-3.61961	0.000332275	0.00131263	-0.546696	DOWN	1.58496	5.16993	3	6.72792	2.32193	5.12928	5.9542	1	5.70044	3.70044	3.80735	5.61471	5.24793	7.21917	8.01681	3.70044	7.06609	3.45943	5.20945	2.32193	6.04439	6.02237	2.80735	5.2854	1.58496	5.58496	2	6	3.16993	5.20945	5.83289	1.58496	4.16993	5.88264	5.83289	7.89482	4.08746	6.74147	7.52356	6.16993	6.83289	5.35755
COCH	1.29352	7.43649	3.71157	0.000234664	0.000962923	-0.22261	UP	7.45943	9.50779	4.52356	9.6987	7.9542	9.86728	8.12412	8.04439	8.43045	8.99718	7.20945	4.58496	8.49985	7.64386	6.61471	9.85331	8.19967	8.51964	8.8392	9.5157	8.85175	9.7039	7.06609	11.2276	9.31288	10.218	6.74147	8.08746	3.90689	9.96	8.65821	5.58496	6.93074	7.81378	7.20945	5.90689	8.03342	8.10852	6.06609	5.08746	5.39232	6.53916
COL10A1	5.843	9.48741	12.7061	2.2187e-31	2.91196e-28	60.466	UP	8.95128	11.1286	10.8895	13.0918	9.74819	10.2621	10.4083	6.02237	12.1938	3.80735	6.35755	12.4605	13.3123	10.0888	10.5971	8.51964	9.31967	3.16993	11.6939	7.36632	3.90689	10.1662	11.3365	11.3853	10.3987	3.80735	9.22159	7.76818	11.4853	14.2999	14.2498	12.5068	11.7578	13.2697	5.04439	10.1762	4.16993	6.18982	11.4315	10.8353	14.2902	5.2854
COL11A1	4.95714	8.50159	9.86558	1.00459e-20	1.19443e-18	36.3473	UP	8.0607	9.88111	10.0888	13.5252	10.0498	9.99294	6.84549	3.58496	10.9823	6.10852	4.75489	12.3912	13.0615	9.03067	8.12412	7.54689	9.35094	7.01123	11.6869	6.89482	3.90689	9.32643	9.78627	9.94398	9.16491	4.58496	6.49185	3.16993	12.2467	12.2854	11.8037	12.0512	10.3174	11.5999	4.45943	7.2384	4.45943	6.74147	11.7082	7.02237	13.5548	3.70044
COL12A1	1.61349	13.5961	6.75664	4.90837e-11	9.28455e-10	14.5297	UP	12.6499	14.538	13.3763	16.5952	12.9826	14.5774	13.4932	10.8742	15.1641	12.1608	10.6917	14.4204	15.5516	14.4726	16.3237	13.1983	12.7719	11.5546	13.8072	12.9283	11.2082	11.744	14.8164	13.0267	13.4773	11.7026	11.5483	10.9951	14.7675	16.1074	13.8744	15.0268	13.3202	16.1189	13.5216	14.2013	12.7145	11.1555	13.7081	13.9014	17.8141	13.1209
COL19A1	-1.84097	4.54342	-4.91638	1.28149e-06	9.42448e-06	4.70878	DOWN	1.58496	3.58496	5	5.72792	0	3.70044	9.633	0	4.24793	1.58496	7.42626	6.72792	4.52356	6.16993	7.43463	4.32193	7.67243	3.45943	5.08746	0	2.80735	7.26679	1	3.90689	1.58496	1.58496	4.52356	3.70044	2.32193	7.49185	4	3.45943	4.90689	6.12928	5.58496	10.1046	4.64386	7.46761	4.52356	6.80735	3.90689	5.20945
COL1A1	3.13041	17.2852	11.2038	1.42169e-25	4.49201e-23	47.3156	UP	16.6159	19.9053	17.4051	19.8999	17.3023	18.2131	18.7069	14.2802	18.9081	15.6388	17.0507	18.327	19.5838	17.8356	20.8928	15.3063	17.2962	15.2488	18.1103	16.6334	14.0744	16.286	18.8705	17.1569	16.6363	14.862	14.1018	14.5472	17.9205	19.9231	19.2498	19.0467	18.0301	18.2519	15.9486	16.5352	15.428	14.481	18.8894	15.6286	21.3522	15.5421
COL1A2	1.99137	16.3259	7.99284	1.37823e-14	5.15122e-13	22.5028	UP	15.2277	18.3491	16.2898	18.7035	15.7124	17.211	17.5731	13.0755	17.977	14.0217	16.2911	17.2578	18.4217	17.0259	19.6703	14.7496	16.2337	13.8669	16.8412	15.3786	13.5595	15.0862	17.5255	16.6116	15.6701	13.3891	13.7346	13.1886	16.9661	18.9521	17.9382	17.6295	16.7181	17.6761	15.2716	16.1338	14.4761	13.1883	17.4191	15.1217	19.839	14.9314
COL21A1	-1.50742	6.5522	-5.12269	4.6623e-07	3.7871e-06	5.67699	DOWN	4.70044	10.2633	4.80735	7.6865	5.24793	7.05528	9.7879	4.45943	5.72792	3.80735	7.32193	7.55459	5.80735	4.80735	9.82177	5.72792	6.87036	4.24793	5.55459	6.83289	6.49185	6.39232	6.40939	6.49185	4.32193	4	3.58496	5.35755	2.80735	6.42626	7.44294	1.58496	6.32193	6.52356	6.78136	9.25267	4.80735	6.6865	6.39232	8.24793	7.73471	6.62936
COL22A1	2.15774	7.46609	6.79472	3.87396e-11	7.46865e-10	14.7598	UP	10.0728	10.8704	10.4136	9.37287	7.15987	9.54689	9.31741	3.16993	7.89482	4.45943	5.78136	5.16993	6.93074	8.80413	8.69697	5.12928	8.18982	7.6865	5.78136	5.52356	5.39232	8.32193	9.51373	12.1043	6	7.45943	5.9542	3.16993	9.07414	11.1485	7.40088	7.57743	6.65821	8.27146	6.2854	6.84549	6.16993	8.77149	7.55459	6.40939	10.7879	8.38802
COL23A1	-1.5754	6.76181	-7.19535	3.02432e-12	7.12229e-11	17.2419	DOWN	5.64386	6.78136	5.88264	7.59246	5.2854	7.02237	7.35755	4.45943	6.45943	5.08746	6.30378	6.37504	5.49185	8.24317	8.22882	5.20945	7.90689	5.83289	5	6.71425	6.62936	6.50779	6.45943	6.24793	4.90689	6.40939	3.32193	5.12928	7.3837	8.224	6.62936	5.70044	6.35755	6.24793	8.30378	7.94251	7.53138	7	6.89482	4.9542	10.1124	7.72792
COL3A1	2.16448	16.4276	8.44504	5.43864e-16	2.79922e-14	25.6639	UP	14.9429	18.453	16.1935	18.8979	15.6659	17.3119	18.0261	13.2497	17.7965	13.6745	16.5829	17.2155	18.1952	17.3373	20.6152	14.5953	16.1625	13.6017	16.5142	15.1242	14.2481	14.6592	17.1299	16.8112	15.615	13.7827	13.6701	13.174	17.5459	18.7564	17.9523	17.6018	16.5559	18.2111	15.4724	16.6851	14.6749	13.1453	17.1343	16.1835	20.565	15.3714
COL4A1	1.69908	14.8489	9.48462	2.0731e-19	1.90168e-17	33.3772	UP	14.1031	15.9382	14.6929	16.1329	14.11	15.4146	14.9863	12.6773	15.6543	13.7581	13.4181	14.5355	14.4188	15.0425	17.3936	13.4526	15.1089	13.7347	12.9095	14.9801	12.7243	13.5533	15.9881	14.7068	14.3621	13.9363	12.2732	11.3859	16.3568	16.1131	16.2197	14.758	15.1447	16.5679	15.7449	16.2561	14.3665	12.8642	15.6507	14.3255	17.5187	14.4629
COL4A5	-2.19257	9.49659	-6.76346	4.705e-11	8.93951e-10	14.5708	DOWN	9.18488	7.74147	7.26679	9.47978	11.6826	10.8258	10.1137	9.1267	9.39232	9.95565	7.74147	10.3197	11.7528	9.85953	12.946	8.93074	9.00282	9.21432	6.40939	9.08215	9.62571	9.69523	7.11894	9.89482	7.10852	8.90388	7.15987	8.36632	4.32193	10.6165	10.543	5.2854	9.15735	9.53138	11.0828	12.7881	9.74651	8.88874	9.25974	10.4126	8.30378	9.09276
COL4A6	-3.42888	7.52075	-8.27379	1.87658e-15	8.61862e-14	24.4522	DOWN	6.45943	5.32193	6.72792	8.26679	7.16993	8.79766	7.25739	6.39232	8.14975	8.13955	4.9542	9.2854	6.76818	8.33539	10.6555	7.49185	7.01123	7.15987	4.52356	7.44294	8.09276	9.00282	5.08746	6.08746	5.61471	7.83289	4.24793	6.16993	1.58496	10.0403	6.47573	2	8.67948	7.14975	10.2264	11.8486	8.40514	7.40939	6.10852	8.72451	4.45943	7.90087
COL5A1	1.45498	14.0614	6.27979	8.71771e-10	1.26052e-08	11.7369	UP	13.2659	16.1336	13.8808	16.7535	13.5928	14.7554	14.4143	11.1131	15.4089	12.7157	13.5726	14.5534	15.6876	15.091	17.3348	12.7127	14.123	11.9211	14.1762	13.5585	11.318	12.5338	15.1189	14.991	13.2303	11.7134	11.0084	11.3208	14.9164	16.4404	15.456	15.1372	14.3771	15.1077	13.5157	14.1261	12.5152	11.1787	15.1449	13.1232	17.2949	12.5438
COL5A2	1.81275	13.2745	8.72908	6.71536e-17	4.02732e-15	27.7116	UP	12.2659	14.4965	13.202	15.6205	12.4805	13.9365	13.6109	10.3174	14.7381	11.3875	11.858	14.1474	14.9319	13.9466	15.9339	12.3109	13.4345	11.1447	13.1957	12.7455	11.0881	11.7406	14.7813	13.4841	12.8665	11.3371	10.6891	10.2009	14.7843	15.697	14.5719	14.2941	13.3767	15.133	13.1456	12.9926	12.2521	11.0748	13.6041	11.9432	16.9087	12.5744
COL5A3	1.10433	10.4703	5.54814	5.21289e-08	5.24269e-07	7.78297	UP	9.57743	12.2671	10.1674	12.5423	11.3026	11.0607	10.8704	8.99435	11.5873	8.97154	9.19229	10.5294	11.0795	11.5038	11.9256	8.65821	10.7822	8.2854	10.0875	11.0735	7.83289	8.71768	12.2723	10.2656	10.332	8.60363	7.47573	7.73471	12.1459	12.7465	10.851	11.8281	10.769	11.93	10.4136	9.3015	9.50184	9.59246	10.643	7.98299	13.941	9.48583
COL6A3	1.3513	15.041	5.78469	1.45128e-08	1.63444e-07	9.01621	UP	13.7283	16.7216	14.9346	17.5591	13.9135	15.909	15.634	11.7482	16.3536	13.6219	14.9715	15.4249	16.7526	16.3883	17.1636	13.811	15.1503	12.2494	14.8575	13.9339	12.6797	13.5901	16.5007	15.072	14.2767	12.5531	11.9801	12.3044	15.5736	17.0793	15.2993	15.9576	14.5516	16.6722	14.7774	15.7061	13.8524	12.3287	15.0671	13.8792	18.4575	14.1622
COL6A4P1	1.96116	3.63944	7.54707	2.95043e-13	8.59782e-12	19.511	UP	3	3.90689	0	4.75489	5.72792	5.08746	5.58496	2	5.20945	4	1.58496	3.16993	6.42626	2.80735	3.32193	5.35755	4.64386	2.32193	4	2.32193	4.75489	5.61471	6.87036	6.85798	4.08746	1	5.45943	1.58496	3.58496	3	4.9542	2	4.16993	4.24793	3.45943	4	3.45943	5.70044	2.32193	4.39232	3.16993	4.70044
COL7A1	2.11196	10.403	7.28213	1.71611e-12	4.25896e-11	17.794	UP	9.3966	11.2324	10.0238	13.6476	11.3129	11.6018	8.71081	8.59246	10.9359	9.69349	7.5157	10.1812	12.8471	11.3581	12.0708	8.85175	9.46352	8.32193	11.7241	11.5976	7.71425	9.84392	12.9054	12.4115	10.4189	9.46761	8.45121	9.87344	11.7511	12.0532	13.3287	12.8144	10.5971	12.9685	11.2414	9.95855	11.1536	9.78463	8.9629	8.5157	16.6105	11.7578
COL8A1	1.78239	11.3434	5.66592	2.77262e-08	2.95019e-07	8.39153	UP	9.48583	12.5103	11.2621	13.0205	8.84862	12.4745	12.7117	7.74819	12.9244	7.64386	10.5897	11.1248	12.3592	13.163	14.2894	8.88874	11.7482	5.04439	11.275	8.43045	9.19476	10.5793	11.0928	13.0522	10.2216	7.35755	8.94544	9.05257	11.0775	13.8764	13.4819	10.9513	11.4615	13.7568	10.1137	12.4878	7.91886	8.33985	12.2405	11.8368	14.5038	10.9622
COL9A1	1.05597	7.23942	2.82423	0.00497271	0.014378	-3.02768	UP	9.28309	6.89482	4.24793	9.16239	3.45943	9.75489	4.9542	8.14466	7.67243	5.75489	6.39232	3.90689	5.83289	9.14211	7.59246	7.90689	8.84862	5.45943	8.33092	5.2854	7.67243	6.20945	7.88874	8.98584	7.76155	7.62936	7.86419	4.90689	7.20945	11.8918	5.75489	7.52356	7.11894	8.27612	7.09803	6.72792	6.76818	7.6865	8.62205	7.26679	6.06609	7.24793
COLEC11	-1.07896	5.87035	-4.27348	2.39972e-05	0.00012301	1.92088	DOWN	5.32193	8.84862	4.52356	6.04439	6.33985	5.61471	8.31741	4.08746	5.45943	5.83289	5.97728	4.70044	4.75489	6.39232	7.08746	4.80735	6.40939	4	3	4.39232	5.12928	5.16993	5.12928	7.71425	5.04439	4.85798	3.80735	4.75489	4.16993	6.71425	8.0607	2.32193	6.70044	6.53916	6.45943	7.24793	7.13955	6.62936	6.42626	5.20945	5.32193	5.35755
COLEC12	-1.36245	8.95773	-4.87571	1.5579e-06	1.12322e-05	4.52206	DOWN	7.2854	9.90238	7.76155	11.1536	3.70044	9.31967	11.2808	5.64386	9.04985	6.98868	10.1573	9.65464	9.40939	10.4491	11.9858	7.52356	8.97728	4.32193	8.3966	6.02237	7.85175	8.43463	5.64386	7.16993	6.93074	9.50184	4.80735	7.65105	9.62205	10.4564	8.08746	8.55075	8.61839	10.9723	7.11894	10.6138	7.21917	8.2854	9.10329	9.21675	10.8626	7.49185
COMP	2.53608	8.12747	5.21697	2.90432e-07	2.47582e-06	6.13108	UP	5.58496	9.40514	8.12412	7.64386	15.8312	8.04439	9.81218	6.91886	11.7052	2	7.01123	6.35755	9.13443	7.70044	11.0485	4.16993	9.11114	3.70044	6.40939	3.32193	6.78136	9.07682	7.36632	16.8282	4.75489	2.58496	5.90689	8.07682	2.32193	12.2082	11.4152	6.39232	10.0042	12.8696	4.24793	9.22641	3.32193	6.96578	9.88874	6.53916	12.6968	4.85798
COPZ2	-1.20656	8.49172	-5.58279	4.33411e-08	4.44804e-07	7.96085	DOWN	7.62205	9.57554	7.87036	8.88874	7.20945	9.25267	8.3837	6.79442	8.633	5.90689	9.26209	9.58308	9.28309	8.46352	11.5406	6.06609	7.56986	7.45121	8.45121	6.78136	7.40939	8.19967	9.52552	7.46761	7.2384	6.71425	6.65821	6.90689	7.29462	9.77972	9.91439	7.98299	9.29462	9.51175	6.91886	11.1799	7.25739	6.96578	9.43879	8.82337	10.1202	7.15987
CORIN	1.86205	7.01218	7.11245	5.1722e-12	1.16499e-10	16.7192	UP	6.50779	7.20945	6.79442	9.38802	9.31288	7.74819	6.58496	5.90689	9.10591	4	5.64386	7.18982	7.7879	8.25267	7.79442	6.52356	7.41785	4.45943	7.03342	7.11894	6.56986	7.5157	7.7879	8.47573	6.14975	5.20945	5.75489	4.90689	7.94837	9.83289	8.60363	6.80735	7.71425	8.62205	4.75489	8.91588	6.47573	6.6865	6.71425	7.70736	9.87191	4.45943
CORO2B	-1.42011	6.82183	-6.19695	1.4133e-09	1.94309e-08	11.2688	DOWN	5.2854	9.59246	4.90689	8.32193	7.62205	7.82655	9.3837	5.49185	6.70044	5.35755	8.70044	6.24793	7	7.03342	9.80252	5.20945	7.37504	4.85798	6.18982	4.75489	5.35755	6.56986	6.2854	11.4767	5.61471	5.2854	1.58496	5.93074	4.90689	8.19967	8.92481	5.04439	6.45943	7.20945	6.26679	7.52356	5.85798	6.71425	7.3837	6.55459	7.53916	5.78136
CORO6	-1.1481	5.99779	-4.75462	2.76469e-06	1.89101e-05	3.97436	DOWN	3.32193	5.16993	3.45943	6.85798	6.02237	6.39232	5.9542	5.70044	6.33985	3.32193	4.9542	6	5.78136	5.24793	9.90388	3.80735	5.52356	4.45943	6.74147	4.58496	4.70044	6.26679	5.24793	5.24793	3.80735	5.78136	4	3.45943	4.85798	6.24793	7.16993	5.9542	4.16993	6.44294	5.12928	9.00282	5.16993	6.67243	5.64386	8.10329	7.72792	5.52356
COX6B2	2.39044	5.50649	6.70995	6.55185e-11	1.21048e-09	14.249	UP	3.70044	3.70044	0	5.04439	8.84235	5.04439	8.65105	6.71425	4.39232	2.58496	3.70044	2.80735	3	8.42206	5.45943	5	4	4.39232	3.80735	7.48382	6.40939	7	9.7879	10.9542	5.80735	3.45943	4.90689	4.90689	2.80735	5.64386	6.20945	9.32193	5.16993	7.10852	8.44294	5.58496	4.70044	7.27612	3.45943	3.58496	5	4.64386
COX7A1	-1.68508	8.30083	-8.748	5.83264e-17	3.54783e-15	27.8496	DOWN	7.59246	8.55075	7.58496	7.84549	6.45943	8.30834	8.49985	6.50779	8.5157	7.04439	8.88264	8.89482	7.56224	7.6865	11.4393	6.16993	7.88264	6.74147	7.45943	6.56986	7.60733	8.67596	8.224	7.61471	7.25739	7.27612	7.40088	7.65821	7.01123	9.40514	9.72962	7.83289	9.23601	8.89178	7.8392	11.1053	6.75489	6.91886	8.90689	9.04439	9.86882	7.24793
CPA1	-1.94981	2.40938	-4.62855	4.96026e-06	2.94014e-05	3.41725	DOWN	0	3.45943	2	4.39232	1.58496	0	4.08746	11.1261	1.58496	0	1.58496	0	0	1.58496	7.07682	2	6.58496	0	3.32193	0	1.58496	5.20945	1	10.2842	0	1.58496	0	5.12928	1	1	5	0	2	1.58496	2.32193	4.90689	2.32193	7.40939	3	3.32193	1	0
CPA2	-3.67095	4.377	-6.06918	2.94834e-09	3.78943e-08	10.5568	DOWN	1.58496	2.32193	1	6.22882	4.58496	4.32193	3	7.91886	2.58496	1.58496	1	3.58496	3.70044	7.73471	3.45943	2.80735	8.52748	2	4.64386	3.58496	1.58496	5.80735	2.58496	4.45943	6.80735	7.33985	1	7.44294	2.32193	6.97728	7.6865	6.79442	4.58496	2.80735	1.58496	3	3.32193	6.74147	6.56986	6.49185	8.2854	1.58496
CPA3	-1.63949	9.26065	-5.0205	7.72566e-07	5.97531e-06	5.19305	DOWN	9.43254	10.1497	9.66178	10.1523	3.45943	11.0875	11.0224	7.65105	6.64386	6.87036	10.8194	8.65464	9.00843	10.7296	10.4757	9.07948	10.3365	9.10591	8.42626	6.62936	9.39446	6	6.70044	8.41785	8.80735	8.80413	7.76818	8.76818	2	10.8765	9.40514	7.22882	7.62205	11.318	9.51373	8.27146	9.74987	8.01681	7.60733	10.2808	9.27612	10.0914
CPB1	-2.97897	3.25703	-7.30891	1.43927e-12	3.62997e-11	17.9655	DOWN	0	6.24793	0	3.70044	1.58496	4.16993	3.16993	9.60733	3.45943	1.58496	1	0	1.58496	4.24793	5.04439	3.80735	6.98868	0	3.90689	0	2	4.85798	1	4.64386	0	4	0	5	1	3.58496	4.85798	1	0	2.32193	3.90689	10.3998	2.32193	6.87036	2.58496	4.32193	3	2.58496
CPB2	1.14089	2.35077	3.85341	0.000135322	0.000588547	0.292085	UP	1.58496	2.80735	1	5.45943	6.87036	3	3.70044	3.70044	3.70044	1.58496	1	0	2	0	2	2	5.97728	5.16993	2.32193	2	1	5.85798	2	8.46761	2.32193	3	0	0	2	0	2.32193	2	2.58496	4.70044	1	1	2.58496	6.64386	2.80735	2.80735	2	3.80735
CPE	-1.94024	10.3649	-7.24771	2.14978e-12	5.20276e-11	17.5744	DOWN	8.41363	15.3329	9.40939	12.4712	8.18488	10.0014	13.4374	8.64746	10.6519	7.82655	11.368	10.0098	8.70736	10.9643	12.9368	7.40939	10.5255	6.47573	9.10329	7.20945	9.9901	10.6027	8.71081	9.46352	7.57743	9.09803	7.45121	9.42626	8.03892	13.5383	12.3764	8.69349	10.9679	11.4788	9.34873	13.3024	8.84862	10.8626	11.2854	9.71768	9.79116	9.34873
CPEB1	-2.05388	5.44357	-7.55218	2.85064e-13	8.32835e-12	19.5446	DOWN	3.16993	6.16993	4.39232	6.75489	4.08746	5.67243	6.98868	1.58496	6.02237	3.16993	6.72792	6.64386	4	5.80735	8.75822	4.52356	7.15987	2.80735	5.2854	3	3.70044	6.98868	3.45943	6.12928	2.32193	4.58496	2.80735	4.32193	3	6.90689	6.90689	3.90689	5	6.35755	5.2854	8.08746	4	7.53916	5.93074	6.80735	7.85175	5.20945
CPED1	-1.67602	10.0813	-5.82224	1.18006e-08	1.35538e-07	9.21598	DOWN	9.10852	9.54689	9.23122	10.84	5.49185	10.1111	11.0293	7.50779	10.9679	7.90087	9.85175	11.221	11.1376	11.4278	14.1053	9.48784	10.1874	8.29462	7.19967	7.80735	8.35755	9.56796	8.94837	10.0307	8.65464	8.44708	8.61471	8.01681	9.12928	11.8853	10.6165	8.41785	9.2738	10.6073	10.0566	14.6385	9.31061	8.12412	9.90087	13.0274	10.3208	9.37721
CPLX1	1.1031	8.67366	4.44421	1.13914e-05	6.25355e-05	2.62689	UP	4.39232	11.8529	7.12928	8.47168	8.50779	9.43254	8.31288	7.94837	10.058	8.7211	8.7039	9.10329	6.45943	10.9513	9.03617	8.42206	8.64386	8.11894	8.21432	11.9954	8	9.55459	11.0808	11.4046	10.6917	7.62936	8.69349	5.42626	9.66356	11.6555	9.77314	11.4157	10.0154	9.33539	10.3966	8.0607	9.72622	9.45943	8.62936	6.18982	8.69697	7.02237
CPLX2	-2.16607	4.76312	-4.5835	6.09356e-06	3.53874e-05	3.22141	DOWN	2.58496	12.8967	4.32193	5.24793	13.3625	3.16993	4.70044	2.58496	3	2.80735	4.75489	4.45943	1.58496	6.79442	7.52356	4.75489	5.78136	2.32193	4.90689	4	2	5.39232	4.32193	12.7455	2.32193	1	4	4.80735	2	13.2264	4.24793	2	2.32193	9.28309	3.16993	6.14975	5.75489	6.26679	4.24793	4.45943	5.04439	2
CPN1	1.58267	1.96664	3.77357	0.00018487	0.000778733	0.000128559	UP	0	1	0	9.94251	2.58496	5.35755	3.45943	0	2	0	1	0	1	0	0	2	5.20945	6.97728	3.70044	0	0	4.52356	1	9.42206	0	6.56986	0	1.58496	0	8.56605	0	1	1	1	2.32193	1.58496	0	7.62205	2.80735	3.80735	1.58496	0
CPNE6	-2.71557	4.34944	-6.97311	1.26148e-11	2.65229e-10	15.8512	DOWN	2.58496	4	1	4	2	3.16993	4.58496	5.42626	6.70044	3.32193	5.16993	4.16993	2	7.43463	6.12928	3.32193	3.45943	4.08746	3.70044	6.6865	5.55459	4.32193	2	5.97728	8.17991	5.2854	2	0	2.58496	2.80735	4.64386	5	5.61471	3.70044	3.32193	5.35755	3.45943	6.16993	6.84549	4.80735	3.16993	4
CPNE7	1.71205	7.99421	5.58207	4.35086e-08	4.45986e-07	7.95714	UP	6.84549	7.03342	7.11894	6.16993	9.69523	4.45943	6.98868	5.20945	8.61471	8.58496	8.41363	9.19476	9.25974	9.37721	5.55459	8.16491	6.71425	4.24793	11.5836	11.6546	8.81057	9.41574	8.17991	8.40088	9.90388	7.57743	6.53916	4.52356	9.79766	8.40939	9.45738	9.72962	8.64386	9.00843	8.61471	7.17991	7.06609	11.0821	6.91886	7	5.80735	7.10852
CPO	-2.19579	2.80721	-7.942	1.96704e-14	7.08799e-13	22.1551	DOWN	0	2	3	3.58496	5.32193	3	4	2	2.80735	2.58496	2.32193	4	4.32193	3.45943	5.35755	1.58496	4.52356	0	3.45943	3.32193	2.58496	5.12928	1.58496	5.08746	3.45943	2	1.58496	0	3	2.58496	3.90689	1.58496	1.58496	4.52356	2.58496	5.04439	1	5.20945	0	3.32193	4.08746	3.16993
CPSF1P1	1.85644	5.59276	5.21745	2.89732e-07	2.47232e-06	6.1334	UP	1	6.49185	6.85798	7.96578	8.49985	7.49185	8.52748	3.58496	7.34873	7.70736	6.24793	7.27612	9.16742	6.37504	4.32193	6.6865	6.39232	3.32193	6.33985	1.58496	6.10852	6.44294	6.72792	6.88264	7.7879	4.75489	4.85798	4.32193	3	7.53916	4.52356	8.3443	6.16993	4.80735	5.16993	5.67243	8.77808	6.18982	4.75489	6.87036	6.6865	10.6156
CPT1B	1.09106	6.65746	5.43975	9.23211e-08	8.78273e-07	7.23265	UP	5.35755	5.16993	5.78136	7.21917	7.85798	7.16993	7.49185	5.24793	7.30378	5.52356	5.39232	5.88264	6.45943	6.80735	6	7.05528	7.04439	6.37504	7.82655	6.22882	6.49185	8.75489	8.85175	7.14975	6.72792	8.42626	6.37504	5.72792	7.33985	6.22882	7.93664	8.41785	4.58496	7.70044	7.04439	5.80735	8.26679	7.9542	6.10852	4.75489	6.72792	7.29462
CPXM1	2.33286	9.3403	9.01113	8.04511e-18	5.76746e-16	29.7903	UP	9.77314	11.722	9.42417	12.0738	7.52356	11.1978	11.8017	6.20945	10.007	7.44294	11.4813	10.0782	11	10.3966	12.8238	7.96	9.07948	6.85798	9.14975	9.60733	7.61471	8.36632	10.2444	8.55459	8.59619	7.94837	6.75489	6.08746	9.62936	11.6193	8.90087	10.2155	9.69	10.3869	7.53916	8.67948	6.76818	7.66534	10.7074	7.44294	12.3886	9.00562
CPXM2	-1.18634	9.90093	-3.55117	0.000428422	0.00164875	-0.78292	DOWN	8.83605	11.1325	9.89482	11.1472	10.4221	9.84078	10.6582	6.14975	10.7566	7.33092	10.1997	11.2883	8.25739	10.1306	14.7362	7.20945	9.78953	5.45943	7.58496	7.56224	8.16993	10.7296	8.86419	9.25974	8.43879	6.44294	8.73132	7.93664	9.57175	12.3891	11.6156	7.93074	10.4818	11.1478	9.45533	14.547	7.21917	8.01123	11.7448	12.7582	13.1723	9.05257
CR1L	1.11422	3.4981	4.18219	3.5389e-05	0.000174865	1.55374	UP	4.45943	5.42626	4.32193	5.58496	2.58496	3.16993	5.88264	2.58496	3.58496	0	3	1.58496	2.58496	4.9542	3.58496	3.58496	6.02237	2	4.39232	0	2.58496	5.12928	1.58496	6.65821	2.58496	5.39232	4.24793	1	3.90689	1.58496	4.24793	3.90689	2	1.58496	3	4.45943	3.32193	6.2854	3	5.32193	2.58496	4.32193
CRABP1	-1.31012	4.4792	-2.28221	0.0229929	0.0537698	-4.38038	DOWN	1	3.58496	1	5.67243	10.7731	6.26679	2.58496	6.55459	3.90689	1.58496	6.74147	5.49185	0	4.75489	7.59991	1.58496	3.90689	3.16993	3.58496	0	1.58496	4.52356	0	6.04439	3.16993	7.08746	3.16993	2.58496	2.58496	7.76155	5.9542	0	4.9542	4.08746	0	6.83289	1	4.80735	5.39232	3.32193	6.24793	2.32193
CRACD	1.06278	10.0694	4.6026	5.58566e-06	3.26826e-05	3.30422	UP	10.5118	10.716	10.5765	11.3537	8.2854	10.6856	11.8553	7.46761	11.2779	9.96867	9.79604	10.4471	9.21675	11.6092	9.65642	11.3663	10.4041	9.0607	8.90989	11.041	8.49985	8.73471	12.8128	9.97871	10.9114	9.42626	10.1649	7.93664	11.1248	11.1273	10.2155	10.9491	8.15482	9.2738	12.813	9.13186	11.9388	8.45121	7.35755	8.73132	10.6257	9.98014
CRCT1	-1.73739	2.13802	-3.01303	0.00274832	0.00854053	-2.4916	DOWN	4.16993	0	0	2.32193	1	5.12928	1.58496	5.08746	0	0	2	7.02237	0	2	0	0	1	5.55459	1	1	4.80735	1	8.40514	1	0	2.58496	6.12928	10.3487	0	0	1	0	1.58496	1.58496	1	0	1	2.58496	2.32193	1	0	5
CREB3L1	1.37649	13.5306	4.62512	5.03899e-06	2.98214e-05	3.40226	UP	13.0993	13.9278	10.9418	12.5575	11.2461	14.6051	13.8343	15.3206	15.6326	15.4272	13.637	14.5916	15.4959	15.215	13.3181	13.5066	14.828	14.5176	12.2252	14.5378	13.6315	12.0262	17.128	13.7633	14.649	12.0957	14.6129	11.7241	10.3597	13.1545	14.0971	15.1274	14.6826	12.9246	15.3677	12.714	16.9665	12.5289	13.9245	10.2348	14.4196	13.6138
CREG2	2.07803	6.19121	5.292	1.98285e-07	1.75292e-06	6.49761	UP	3.32193	5.75489	2.80735	7.48382	8.88874	5.88264	6.40939	3.58496	10.9578	1.58496	2	4.24793	8.82337	4.45943	5.12928	8.82972	5.61471	6.89482	7.6865	4.08746	1	7.54689	9.89785	5.72792	6.61471	4	10.9403	6.91886	5.04439	6.18982	9.64746	5.39232	9.69697	6.61471	3.58496	5.16993	6	7.84549	6.22882	4.70044	6	6.42626
CRHBP	-1.60445	4.12303	-6.54372	1.80935e-10	3.00158e-09	13.2623	DOWN	4.80735	6.24793	3.80735	4.64386	0	4.80735	6.98868	2	5.04439	1.58496	6.72792	4.08746	1.58496	5.61471	5.35755	3.80735	5.90689	1	3.58496	1	2.32193	5.08746	1.58496	3.45943	1.58496	4	3.32193	3	4.08746	6.24793	5.2854	3.80735	3	3.80735	3.80735	5.58496	3.70044	5.2854	4.45943	5.2854	3	5.83289
CRISPLD1	1.18912	8.41342	4.51625	8.25866e-06	4.65508e-05	2.93231	UP	6.76818	8.76487	6.52356	10.0782	7.56224	11.633	10.2773	8.64746	9.40727	4.80735	8.77479	7.88264	7.58496	9.27612	11.2216	7.01123	7.74147	5.49185	6.84549	6.18982	6.84549	7.54689	8.41363	9.59619	6.87036	8.66178	8.27146	6.82018	6.33985	10.2574	8.71768	7.87036	7.91886	9.64205	7.15987	10.102	6.02237	7.97728	7.81378	9.64386	9.42836	7.24793
CRNN	-2.45392	1.562	-3.76564	0.000190628	0.000799923	-0.0285339	DOWN	0	1	0	1	0	1.58496	1.58496	7.03342	0	0	0	4	0	0	0	2	3.80735	0	0	0	0	2.80735	0	1	0	1	5	12.329	0	0	0	0	0	0	0	1	1	5.04439	4.85798	1	0	0
CRTAC1	-2.50018	4.99201	-6.15156	1.8377e-09	2.46307e-08	11.0145	DOWN	2.58496	10.9944	2	5.90689	5.64386	6	8.0607	5	7.09803	2.32193	6.32193	5.52356	2.32193	5.70044	8.62205	2	5.35755	0	2	0	4.52356	4.75489	2.58496	10.7557	2.80735	3.16993	5.35755	5.67243	1.58496	6.88264	8.26679	2.58496	4.32193	7.87036	5.12928	7.76818	1	5.70044	6.85798	6.12928	6.04439	2
CRY2	-1.01522	10.8046	-9.01694	7.69746e-18	5.54152e-16	29.8336	DOWN	9.83605	11.0307	10.1396	11.2107	10.7296	11.2952	12.3883	10.0701	11.6693	10.3298	10.8321	10.2633	11.3247	11.4419	11.8427	9.78627	11.3309	9.77808	9.67596	10.3354	9.85175	10.0701	12.2195	11.9211	9.70736	10.137	9.74315	8.90989	11.043	11.794	10.9929	10.5038	10.0728	10.821	10.9744	11.5068	11.8013	8.5812	10.1762	10.2808	11.4548	10.3772
CRYAB	-2.7252	9.74659	-8.9735	1.07045e-17	7.50064e-16	29.5104	DOWN	8.93664	10.0154	8.92481	9.93811	6.56986	9.35755	10.014	10.3197	9.40727	7.09803	10.4747	12.1472	8.54689	9.7039	13.9705	6.79442	8.98584	7.15987	8.29921	7.19967	9.61102	10.2644	8.54303	8.33985	6.85798	7.04439	8.24317	9.56986	7.12928	11.6284	10.8082	7.98868	11.3326	11.1555	8.29921	14.5597	7.17991	6.56986	11.4823	12.5073	10.8226	8.82337
CRYBA2	-1.51904	3.3888	-3.67714	0.000267527	0.00108293	-0.344844	DOWN	0	11.9866	0	2	0	1.58496	2.32193	4.32193	3.45943	2.58496	5.04439	4.16993	5.49185	6.50779	3.90689	2.32193	2.32193	3.32193	6.08746	6.20945	1.58496	6.72792	6.32193	9.34873	5.39232	2.32193	4	6.10852	2	2.80735	2.32193	1.58496	2.58496	3.70044	2.58496	7.74147	6.37504	4	1.58496	2.58496	1	2.80735
CRYBB3	1.11733	3.91613	4.92029	1.25758e-06	9.26459e-06	4.7268	UP	3.16993	2	3.16993	4.39232	6.24793	5.35755	5.16993	3.58496	4.32193	3.58496	3.16993	3.32193	4.58496	4.52356	3.58496	4.24793	4.70044	3.80735	5.20945	4.39232	4.52356	5.12928	4.24793	4.24793	2	4.08746	3	1	4.08746	4	4.08746	4.32193	4.52356	5.64386	2	3.45943	5.85798	4.64386	2.80735	2.32193	3.58496	3.32193
CRYGD	-1.26644	0.715937	-5.21416	2.94599e-07	2.50696e-06	6.11741	DOWN	0	1	0	2	0	1.58496	1	0	1	0	0	0	1	1.58496	0	1	2.58496	0	1	0	1	3.45943	0	4	0	3.90689	2	0	0	1.58496	0	0	3	1	0	0	1	4.24793	0	0	1	0
CRYL1	-1.07078	10.8793	-6.29254	8.08956e-10	1.17969e-08	11.8094	DOWN	9.77643	10.3264	9.47776	10.5098	11.2192	11.4838	10.3859	8.57365	10.0593	12.3923	11.813	10.1787	11.0224	11.7797	10.5459	9.24317	10.2276	11.0437	10.363	11.823	9.64566	10.0485	10.7599	10.1007	12.2432	8.59619	11.6371	8.37069	10.4686	10.9672	10.1293	11.6952	11.6764	9.82337	11.856	10.6193	11.4589	10.0485	11.3619	9.83605	9.96145	11.4605
CSAG1	2.82572	4.35687	4.16757	3.76355e-05	0.000185027	1.49564	UP	4.08746	9.99294	2.32193	10.0154	9.97011	10.9922	2.58496	9.12153	2	2.58496	3.70044	3.32193	0	1.58496	0	1.58496	3.32193	5.49185	1	0	10.8773	1	1	5.64386	2	10.9564	0	7.33985	2.80735	11.2228	11.8925	2.32193	1.58496	2.80735	3.80735	4.24793	3.58496	10.6165	7.32193	4.16993	1	5
CSAG2	2.01956	2.09864	4.38354	1.48852e-05	7.98653e-05	2.37314	UP	1.58496	7.05528	0	6.45943	5.49185	7.37504	1	4.70044	0	0	1.58496	2.58496	1	0	0	0	1	6.02237	1	0	7	0	1	1.58496	0	6.61471	1	4	2	7.45121	5.20945	0	1	0	1	2	0	2.80735	0	0	0	1.58496
CSAG3	2.51893	2.76237	4.61006	5.39848e-06	3.16961e-05	3.33666	UP	2	6.74147	0	6.74147	8.44294	8.71081	1	7.14975	1	0	1	3.58496	1	1.58496	0	0	1.58496	7.37504	0	0	7.49985	1	3	3.58496	1	8.07146	2	5.32193	3	6.85798	9.57175	0	1	0	0	1	0	7.10852	5.39232	0	0	1
CSAG4	1.14214	1.18849	3.2042	0.00146117	0.00489313	-1.91507	UP	1	4.16993	0	3.16993	5.42626	3.70044	0	5.16993	0	0	0	0	0	0	0	0	2	0	0	0	5.2854	0	0	1	0	5.16993	0	3.16993	0	5.35755	6	0	0	0	0	0	1	5.32193	1	0	0	0
CSE1L	1.10563	13.0737	8.96123	1.17472e-17	8.13106e-16	29.4193	UP	12.8084	12.7729	12.363	13.5142	14.4574	14.7955	12.9385	10.6724	14.5704	13.2506	11.6234	13.6198	12.986	13.1611	12.6558	13.6895	13.1472	12.9241	13.4579	13.3453	12.1415	13.2104	13.0949	14.1039	13.6247	13.7538	13.4853	11.0908	14.2798	13.315	13.536	13.4367	12.7377	13.3016	13.0236	12.5457	13.9516	12.8916	12.8478	11.4823	12.7783	14.362
CSF2	2.56135	3.84479	6.50928	2.22773e-10	3.6425e-09	13.0603	UP	5.12928	2.80735	4	5.61471	3.70044	4.58496	1.58496	3.32193	2.58496	4	2.32193	2.32193	5	3.58496	5.08746	4.70044	0	3.58496	2.32193	4.24793	3	1.58496	6.49185	0	4.9542	4.85798	1.58496	3.32193	7.67948	4.85798	2.80735	6.78136	5.52356	7.59246	2.58496	3.16993	3.16993	4.52356	2	1	9.3966	6.14975
CSMD2	1.42723	7.32862	6.09839	2.49485e-09	3.25313e-08	10.7185	UP	3.80735	9.41785	6.24793	9.78463	8.53138	9.45121	8.87958	4.64386	8.224	4.32193	5.55459	7.17991	8.27146	8.27146	10.5536	6	8.30378	8.31741	7.2384	5.04439	4.16993	7.70044	7.32193	5.67243	5.61471	8.2384	2.80735	4.70044	6.70044	9.06609	6.40939	8.17493	6.32193	9.65284	6.22882	8.45943	6.45943	9.21675	7.02237	7.11894	11.6878	6.89482
CSRNP1	-1.45851	11.2851	-9.45008	2.71795e-19	2.45363e-17	33.1116	DOWN	10.6221	10.9359	10.9622	11.446	10.9513	11.3998	12.6255	10.1984	10.633	11.381	11.6234	11.5579	11.6243	11.6613	12.7011	9.38154	11.2935	10.9636	10.2107	9.20212	10.8289	10.0526	12.2363	10.9614	11.0795	10.4273	10.988	9.96145	11.7211	12.4383	11.3376	12.9324	11.3902	11.4035	13.4082	11.2312	12.0941	9.70908	11.0478	9.62022	12.975	11.1991
CSRP1	-1.34198	14.0178	-6.52243	2.0578e-10	3.39229e-09	13.1373	DOWN	13.3185	14.1025	12.3947	14.2142	13.3281	14.2382	13.569	11.7756	14.3534	13.0464	13.4786	15.3016	14.2191	14.5242	18.1331	12.2453	13.6213	13	13.7776	13.3045	12.6843	13.8465	13.5366	13.4177	13.3613	13.0582	13.4722	12.2995	13.6989	15.3591	14.5592	13.4984	14.3326	14.3059	14.1126	18.5478	13.8783	11.6952	15.388	16.3984	14.0635	13.3273
CST1	6.63395	9.67858	13.2	2.33161e-33	4.18757e-30	64.9486	UP	12.2207	12.6154	12.719	11.0848	12.3872	12.2432	4.52356	9.75322	12.2767	6.83289	6.22882	12.1354	13.9382	12.3493	8.43879	11.2497	9.86882	9.66	11.0224	9.70908	7.62936	11.7883	10.7682	11.1396	10.9513	7.83289	12.9828	8.62205	7.93074	13.5296	14.7975	12.2917	13.0627	10.5765	7.16993	7.22882	8.03892	6.96578	13.619	5.49185	10.3641	4.80735
CST2	2.98681	6.33216	7.62603	1.73049e-13	5.2304e-12	20.0316	UP	7.03342	6.70044	7.5157	5.35755	5.39232	7.90689	3.45943	3.90689	7.89482	3.90689	7.12928	6.12928	8.07146	7.2854	6.59991	5.32193	7.58496	4.70044	4.16993	4.08746	5.20945	5.83289	5.42626	8.82655	5.39232	2	6.08746	5.24793	2.58496	10.0728	10.3208	5.88264	8.66178	10.3805	7.88264	7.09803	6.04439	3.16993	8.61471	7.33985	4.39232	5.85798
CST4	3.50799	3.80201	8.74273	6.06643e-17	3.67693e-15	27.8111	UP	5.16993	4	2.58496	3.80735	4.39232	6.02237	0	3.90689	3.58496	1.58496	1.58496	3.70044	4.85798	2.80735	1	4.80735	5.83289	4.64386	3.80735	3	4.9542	4	3.80735	4.08746	4.24793	3.32193	4.24793	2.32193	0	7.40939	6.20945	4.90689	5.80735	8.98868	3.16993	3.58496	3.70044	5.32193	3.90689	2.58496	5.93074	4
CSTA	-2.08875	7.96491	-5.48573	7.25234e-08	7.07083e-07	7.46497	DOWN	8.09276	7.40088	7.8392	7.13955	5.39232	9.45943	8.31288	9.57743	6.85798	5.24793	8.89785	9.61287	6.71425	8.69697	8.13955	7.59991	8.02791	7.74819	5.24793	4.80735	8.20457	6.71425	5	4.85798	8.64024	6.42626	9.56605	13.4922	7.94251	6.45943	8.224	7.88264	6.72792	7.94251	9.15228	8.48784	8.64746	7.2384	7.7211	6.45943	7.97154	8.74819
CSTL1	1.34767	2.40195	4.24964	2.65773e-05	0.000135019	1.8243	UP	0	1.58496	0	4.32193	2.80735	4.85798	4.16993	0	5.75489	0	1.58496	3.90689	1.58496	3.32193	0	3.90689	6.02237	3.32193	3.16993	0	1.58496	5.97728	6.33985	5.88264	1	2.58496	4.08746	0	0	0	3	2	4.16993	1	2.32193	2	1.58496	7.17991	3.90689	2.58496	3	3.32193
CSTP2	1.42716	1.54909	5.40609	1.10048e-07	1.02969e-06	7.06366	UP	2.80735	3.45943	3.45943	4.58496	0	3.58496	0	1	2.80735	0	0	0	1.58496	2.80735	2.80735	1.58496	1.58496	0	1	0	1	1.58496	0	2.32193	0	0	0	2.32193	0	4.32193	4.16993	2	1	4.52356	0	2.80735	0	3.58496	1	2	3.16993	0
CT62	-1.00655	2.82094	-3.49399	0.000528159	0.00198097	-0.977048	DOWN	1.58496	2.32193	1.58496	4.32193	2.58496	3.70044	2.80735	2.32193	1.58496	3.32193	1.58496	3.32193	3.70044	4.75489	4.24793	4.64386	3.32193	1.58496	1.58496	2.80735	1	1	2.32193	5.35755	1	1.58496	2.32193	2.32193	1	4.80735	3.58496	1.58496	0	1	4.64386	3	3.58496	4.45943	0	2	2.80735	3
CT75	-1.63413	3.80243	-5.13162	4.45926e-07	3.63342e-06	5.71969	DOWN	1	4.08746	1	5.08746	4.58496	3.58496	3.16993	1	4.90689	1	3.45943	6.61471	3.16993	4.64386	7.52356	4	3	0	6.12928	3	2.58496	4.58496	1	3	1.58496	1.58496	2	1	2.32193	4.9542	4	4.75489	4.45943	4.39232	3.90689	7.54689	3	4.08746	4	4.85798	6.04439	2.32193
CT83	3.42955	4.76699	5.10056	5.20491e-07	4.18798e-06	5.57145	UP	1	7.6865	2	4.85798	6.6865	9.17991	7.71425	8.40514	1.58496	0	0	2	8.56224	7.50779	7.65105	1	3.80735	10.0196	0	9.79604	8.09276	2	0	5.08746	1.58496	1.58496	10.6348	0	9.20457	7.62936	8.96578	1.58496	8.90689	0	9.85331	3	4.75489	9.13186	8.58871	2.32193	6.53916	7.94837
CTAG2	1.72504	1.94135	2.7979	0.00538822	0.0154096	-3.0998	UP	0	5.45943	0	11.599	0	2.80735	1	9.55267	0	0	1.58496	0	0	0	0	0	2	8.86419	0	0	7.06609	0	0	6.42626	0	11.6751	0	8.23362	0	11.0049	4.24793	0	2	0	0	4.24793	3.45943	2	3.70044	0	0	1
CTAGE8	1.02755	2.81912	3.44872	0.000622103	0.00229152	-1.12863	UP	1.58496	1.58496	3	4.08746	5.55459	4.9542	4.32193	2	4.64386	0	1	3.32193	2.32193	5.2854	1.58496	3.90689	3.80735	3.58496	3.45943	5.04439	3.16993	5.16993	4.58496	2.80735	4.24793	4.32193	5.45943	0	5.16993	2	3	4.58496	0	2.58496	3.80735	0	1	4.45943	1	1	4.70044	3.80735
CTCFL	1.01518	3.14867	2.16926	0.0306415	0.0684928	-4.62709	UP	0	0	0	5.52356	10.4788	2.32193	4.64386	4	2.58496	0	1.58496	1.58496	2.58496	1.58496	3.58496	5.16993	7.39232	1	4.24793	1	2.58496	7.40088	1	6.59991	0	12.4504	5.35755	9.89633	1	1	6.14975	4	3.90689	1	4.32193	1.58496	2.58496	8.82337	1	4.58496	1	2.58496
CTF1	-1.31498	8.05758	-4.6116	5.36066e-06	3.1512e-05	3.34335	DOWN	6.84549	9.17243	6.98868	9.15228	10.5661	8.03892	7.94251	6.52356	7	5	7.62205	8.46761	7	7.97728	11.3134	7.08746	7.67948	8.97154	8.80735	5.32193	9.78953	7.87652	6.12928	6.39232	6.84549	8.64746	5.24793	8.03342	6.40939	8.92184	9	6.78136	9.76155	8.33985	8.90989	11.6096	7.20945	6.14975	9.00562	10.1523	8.51175	6.65821
CTHRC1	3.23978	10.5248	12.449	2.30663e-30	2.12733e-27	58.1623	UP	10.1573	13.0213	11.0444	12.7168	10.3454	11.2597	11.1131	7.74819	12.2131	7.11894	9.6865	12.3066	12.5694	10.9159	12.0468	9.29002	10.4126	8.66534	11.0914	8.79116	9.67066	10.3869	11.255	12.692	10.7895	8.41785	9.62205	8.18488	10.3663	13.0745	12.7838	11.1674	11.8194	12.8958	8.07682	11.0314	7.8392	7.66534	11.6935	9.43879	13.7036	9.21189
CTLA4	1.49597	7.16054	5.91776	6.93841e-09	8.33978e-08	9.72911	UP	7.50779	5.55459	8.54303	8.39232	8.40514	7.98299	9.44708	4.80735	5.39232	4.85798	8.16993	7.11894	8.62571	8.30378	7.39232	6.35755	8.14466	6.64386	4.32193	5.67243	6.30378	6.14975	6.58496	6.04439	6.89482	9.19229	6.70044	5.20945	9.32193	7.91289	7.04439	9.34873	4.39232	6.9542	6.22882	7.08746	8.0607	6.04439	5.93074	6.80735	8.13443	9.02237
CTNNA2	-2.24387	3.38317	-5.3905	1.19342e-07	1.10614e-06	6.98567	DOWN	1	3.16993	2.32193	4.90689	4.39232	1	3.45943	1	2.32193	0	1	5	4	5.04439	7.22882	3.70044	6.39232	0	6.42626	0	0	3.70044	2	8.24793	1	0	0	1	1	4.75489	4.16993	1	2	4.70044	3	5.72792	2.80735	7.25739	4.16993	4.70044	2	1.58496
CTNNA3	-2.49224	5.51397	-5.2173	2.89954e-07	2.4736e-06	6.13266	DOWN	1	5.70044	3.90689	5.97728	4.80735	4	6.70044	0	6.9542	0	4.58496	9.41574	5.93074	6.84549	11.6653	7.33985	6.61471	4.85798	3.32193	7.56986	3.90689	6.53916	6.70044	4.90689	5.72792	2	3.32193	1.58496	3	7.88264	5.67243	8.9571	6.22882	7.93664	4.9542	12.0084	2.32193	6.78136	7.62936	10.5736	4	4.08746
CTNND2	-1.41921	5.6981	-3.22334	0.00136923	0.0046188	-1.85549	DOWN	4.24793	6.39232	4	6.18982	0	6.37504	7.67948	4.39232	5.67243	5.2854	6.59991	4.9542	5.72792	9.13186	9.29462	4.64386	7.55459	7.37504	3.32193	2	5.32193	4.58496	3.32193	10.6795	3	8.2384	2.80735	5.49185	3.80735	6.59991	5.04439	4.32193	5.72792	10.697	7.83289	7.37504	4.9542	6.52356	6.32193	7.24793	5.9542	6.85798
CTRB1	-1.05772	1.31554	-3.19728	0.0014958	0.00499487	-1.93653	DOWN	0	0	1	2.32193	2	0	1	9.62571	0	0	0	0	0	0	0	2.32193	2	0	3	0	1	2.32193	1	2.32193	0	0	1	6.12928	1	0	4.58496	0	2.58496	2.58496	1.58496	1	2.32193	4.45943	0	1	2.58496	1
CTSB	1.03954	15.9174	6.92602	1.69986e-11	3.49856e-10	15.561	UP	16.1243	16.9479	15.5474	16.5739	16.7517	16.6742	15.4846	13.2962	16.5059	16.1074	15.6732	15.842	17.0386	16.6539	16.401	15.7993	14.4651	14.9746	14.8559	15.7057	14.4964	16.2877	15.9747	14.3204	15.3778	16.1953	14.7275	14.5224	17.2766	16.3923	17.1988	16.3919	18.2227	16.3566	15.6077	15.2904	15.6211	13.3021	15.8063	13.9798	16.8498	15.1458
CTSF	-1.49516	10.05	-6.61792	1.15252e-10	1.99638e-09	13.7002	DOWN	8.40514	11.3004	8.21917	10.4959	11.0369	10.445	11.0808	9.81698	9.39017	7.06609	10.4115	9.77643	8.84549	10.764	12.3701	6.75489	9.40088	8.11894	8.62936	6.89482	10.2432	9.16239	7.94251	8.40514	7.63662	10.1059	7.43463	8.31741	8.31741	11.8013	10.2597	8.3443	9.39017	10.7211	8.94251	11.5551	8.07682	9.18488	10.1836	10.4083	11.0587	9.82814
CTSG	-3.22236	4.56622	-7.69326	1.0953e-13	3.41645e-12	20.4781	DOWN	4.9542	7.07682	4.39232	6.42626	0	7.56224	7.93074	2	4.16993	3.32193	8.32643	6.12928	4	5.42626	9.24555	3.16993	5.58496	0	4.58496	0	4.58496	4.9542	2	3.70044	3	2.80735	1.58496	5.08746	0	7.63662	5	2.58496	4.45943	6.26679	5	4.32193	3.16993	5.35755	4.85798	4.70044	3.90689	1.58496
CTSV	1.66326	9.04863	5.03002	7.37323e-07	5.73522e-06	5.23777	UP	9.28771	9.41574	7.66534	12.3276	9.33762	11.2831	8.99718	7.57743	9.71768	10.0755	9.10329	10.8642	7.57743	9.16742	6.59991	8.8009	8.78136	11.9791	8.03342	11.1092	7.7211	10.1202	10.6795	7.69349	8.99152	8.94837	8.74819	8.18488	6.59991	10.5999	10.4574	7.46761	12.0654	9.03892	10.3061	5.39232	9.36194	8.8392	8.07682	6.18982	9.16993	8.3837
CTTNBP2	-1.31785	7.60076	-4.67066	4.08629e-06	2.46797e-05	3.60186	DOWN	4.80735	7.17991	4.85798	8.25739	3.45943	8.36632	10.5068	4.24793	7.56986	3.70044	7.40088	6.75489	6.44294	8.12412	9.92184	9.29232	7.45121	8.12412	10.8925	6.26679	5.83289	9.42206	5.12928	7.6865	8.224	6.61471	6.96578	7.65105	3.45943	10.2691	6.65821	6.61471	5.42626	7.36632	8.224	9.64024	6.06609	9.31288	7.04439	9.0954	6.9542	6.93074
CTXND1	-2.96822	4.45463	-7.56766	2.56815e-13	7.53531e-12	19.6464	DOWN	0	3	1.58496	4.58496	4.16993	6.62936	7.82655	4.70044	2.80735	3.32193	4.70044	4.39232	3.45943	6.70044	5	4.39232	7.02237	9.01959	3.80735	0	3.70044	5.32193	3.16993	5.75489	0	2.80735	7.30378	6.20945	1	4.58496	4.39232	3	3.58496	4.08746	5.49185	8.94251	5.08746	6.56986	4.70044	4.52356	6.62936	10.207
CUX2	-1.30983	4.20352	-4.3062	2.08425e-05	0.000108419	2.05425	DOWN	3	3.80735	4.08746	5.93074	3.58496	8.5157	7.90689	4	3.70044	0	5.04439	4.16993	1.58496	4.32193	5.61471	4.90689	8.17493	2	5.49185	3.32193	3.32193	7.21917	4.70044	6.64386	3.58496	4.85798	1	3.80735	3.32193	3.80735	5	2	3.16993	2.80735	4.08746	4.16993	4.39232	8.62936	3.16993	5.24793	5.85798	4.08746
CWH43	-5.12181	2.38781	-10.5821	2.80542e-23	5.66462e-21	42.122	DOWN	0	0	0	2	1	2	0	5.32193	0	0	0	0	0	8.70736	1	0	5.12928	0	8.49586	0	1.58496	3.32193	0	1	0	0	0	7.21917	0	3.80735	1	0	0	7.62936	2	0	7.62936	5.90689	0	3.16993	5.04439	0
CXCL1	2.90556	10.9001	7.79573	5.42455e-14	1.79541e-12	21.1642	UP	10.2819	8.65105	11.1241	11.8568	12.7035	12.5406	8.93369	11.5319	9.92184	11.7846	8.87344	9.33985	11.4419	12.0464	11.6198	10.9403	12.0815	9.36632	10.5878	11.4168	10.3955	8.18488	12.041	7.04439	12.8063	10.973	10.4656	9.42206	13.1785	11.4325	9.61287	14.2572	10.5275	14.1582	10.3332	7.24793	13.1044	9.74483	11.944	5.67243	15.3665	13.605
CXCL10	2.15481	9.87287	5.98153	4.84891e-09	6.00814e-08	10.0755	UP	13.5161	8.56986	13.3498	10.988	6.53916	9.41363	11.0708	6.24793	10.1861	9.57932	8.27612	12.6341	11.2544	11.431	8.21917	10.2288	9.68825	9.25503	8.75154	7.39232	8.55075	9.28077	10.6484	7.11894	10.0471	11.0848	10.1085	8.33539	11.6733	11.2544	11.5594	11.9607	7.45943	8.55842	7.19967	9.42206	9.67772	6.67243	10.2095	9.38586	8.31741	11.3998
CXCL11	2.39646	8.42657	6.42824	3.62219e-10	5.68293e-09	12.5886	UP	12.0944	6.2854	11.2848	10.0307	4.32193	7.44294	10.4645	5.90689	10.875	6.62936	5.97728	11.66	9.77314	9.32643	6.78136	10.2408	8.24317	8.14975	8.93958	5.67243	7.62936	7.83289	9.21917	5.80735	8.89785	8.47978	8.69697	5.85798	9.88417	9.95274	9.70908	11.1517	6.79442	6.30378	7.57743	8.24317	8.31288	5.67243	8.92778	6.75489	6.89482	10.8634
CXCL12	-1.70369	10.9189	-6.70495	6.75714e-11	1.24302e-09	14.219	DOWN	8.06609	12.5236	9.79442	11.8884	9.35315	11.7912	13.1881	7.63662	11.5182	9.57932	12.577	10.5028	9.9901	11.8122	14.3353	8.06609	9.86573	9.57554	7.07682	8.61471	9.71081	9.7879	9.69349	11.4215	8.98299	9.27146	8.3837	9.94105	10.2621	11.576	11.5285	10.0444	10.3674	10.9887	12.0119	12.7391	9.03617	8.33092	10.1762	10.7985	12.8158	11.1376
CXCL13	1.14297	9.34475	2.61831	0.0091667	0.0243959	-3.5743	UP	10.5897	7.89482	12.0536	10.7056	6.2854	8.49185	12.8889	5.67243	6.06609	6.08746	12.9926	9.98442	10.9076	12.0244	10.6312	6.42626	12.4458	7.5157	8.53916	5.20945	9.55267	8.03342	7.89482	7.04439	9.09011	11.4773	8.7039	10.1687	11.2975	7.98868	9.68825	11.9989	9.40514	5.97728	10.2597	12.3292	11.2318	6.96578	7.99435	11.4404	8.84862	11.7482
CXCL14	-1.42522	11.6668	-3.61324	0.000340286	0.0013404	-0.568863	DOWN	13.1808	9.59246	5.93074	13.4186	9.91886	13.8505	12.8162	11.9812	12.0458	13.1314	13.788	9.28077	9.01123	14.0355	12.3993	13.7542	12.233	13.8825	10.6582	12.1049	12.3309	8.11374	9.29462	11.7703	11.0688	12.1186	12.857	10.7185	5.24793	13.8295	10.3004	10.0661	10.4919	11.1319	13.0203	12.1627	12.8301	12.3443	12.4014	11.1824	8.01123	12.7883
CXCL16	1.23268	13.2823	7.62414	1.75283e-13	5.28387e-12	20.0191	UP	13.979	14.1542	13.5866	13.6218	12.6941	14.4151	13.128	12.4276	14.5647	14.246	12.4712	14.3688	13.8252	13.3871	11.7078	13.3742	13.5044	14.2009	11.9399	12.9794	13.06	12.4294	14.4442	11.5231	13.3884	13.8802	13.5554	11.0539	14.2424	13.7174	14.6136	13.5398	13.0763	13.5977	13.7145	11.785	14.3746	11.7313	14.2045	10.5058	13.3417	13.9053
CXCL17	-2.71479	9.53629	-4.16741	3.76609e-05	0.000185125	1.495	DOWN	15.976	5.97728	11.3848	6.91886	4.75489	6.84549	8.18982	11.7245	9.30378	8.36632	3.32193	11.9894	11.8198	14.0792	9.04985	4.24793	13.1043	16.1321	5.61471	6.40939	12.9832	7.62936	4.80735	5.80735	8.09803	12.203	11.8376	13.0184	5.2854	10.4828	6.98868	4.64386	9.73978	9.98868	9.03342	6.30378	12.9063	6.87036	15.5927	2	10.1459	14.5753
CXCL3	2.01207	10.0961	5.48826	7.15664e-08	6.9935e-07	7.47776	UP	10.6156	7.16993	10.1724	10.5488	11.0396	11.3641	9.37069	11.2414	9.35755	11.9462	7.7879	3.58496	9.0634	11.6804	10.4828	11.1092	11.2627	11.0251	10.1189	9.70044	9.34207	8.29921	11.3264	5.72792	11.9618	10.2009	9.49785	7.55459	11.2088	9.67419	8.98014	13.6896	8.47978	11.9454	10.9658	6.97728	12.6239	11.5803	11.8773	3	13.0984	12.0705
CXCL5	2.21348	10.2435	3.29427	0.00107322	0.00371766	-1.63174	UP	3.45943	11.7645	11.8556	10.6591	7.65821	10.7969	12.905	3.32193	6.10852	9.27612	9.64746	4.70044	9.16239	10.3454	10.3253	5.2854	13.2023	14.5738	5.80735	8.93958	3.16993	7.22882	13.8945	5.39232	10.6156	13.3868	10.0362	4.16993	14.1888	9.33985	11.2161	9.45533	9.17493	15.1992	13.6927	8.90689	11.5507	15.2213	14.1776	4.16993	16.3779	11.9484
CXCL6	2.66424	6.99592	6.08315	2.72228e-09	3.52275e-08	10.634	UP	4.85798	7.17991	4.75489	7.70044	10.5727	8.52748	4.64386	6.72792	6.47573	5.04439	6.02237	1	5.39232	7.43463	10.4221	5.90689	7.89482	6.39232	4.45943	9.19476	7.01123	4.9542	7.90689	4.80735	8.54303	8.31288	6.33985	6.74147	6.89482	5.52356	7.04439	7.27612	7.77479	12.1721	8.07146	5.45943	7.56986	6.93074	8.94544	3.16993	14.1883	12.3674
CXCL8	2.77582	10.9966	6.86029	2.5713e-11	5.11323e-10	15.1583	UP	12.0444	12.3644	11.3309	13.1036	11.0788	11.9578	9.27845	12.1793	10.4909	9.45121	8.90388	11.8937	11.8838	10.4242	11.8471	11.1529	10.6751	9.41363	9.85953	10.2515	9.98726	9.98157	11.2544	8.2384	12.0664	11.4522	9.52748	8.78136	17.021	9.92926	8.35315	11.6221	11.8514	15.491	10.5727	6.82018	11.0478	10.5878	11.2796	5.67243	16.0857	12.6915
CXCL9	2.46724	11.2507	6.50717	2.25622e-10	3.68555e-09	13.048	UP	14.6705	8.27146	15.1319	11.6362	8.07146	10.9114	12.9462	7.44294	10.0782	9.04712	10.8757	11.7591	13.9846	13.6651	9.40514	10.9151	10.7406	10.8765	9.73132	9.20457	10.4315	11.0417	12.0307	8.8392	10.716	12.7226	12.1914	8.98299	13.9711	11.4666	13.3826	13.1206	8.32643	8.59991	8.76818	11.3608	11.9159	6.56986	10.8439	10.2515	9.79279	12.2122
CXCR1	-1.18692	5.34326	-2.98016	0.00305391	0.00935892	-2.58731	DOWN	5.08746	7.83289	3.70044	6.98868	6.2854	6.20945	5.55459	3.58496	2.32193	4	4.9542	3.90689	4.58496	6.45943	4.9542	5.90689	6.04439	1.58496	3.32193	0	5.90689	3.90689	2.32193	4.45943	4.64386	5.08746	2.80735	2	8.09276	4.52356	3.90689	3	3.32193	8.90689	4.45943	3	6.9542	5.52356	8.29462	3.32193	10.3015	9.45943
CXCR2	-1.6268	6.54445	-4.52842	7.81887e-06	4.42693e-05	2.98432	DOWN	5.58496	8.64024	5.61471	7.85175	4.70044	6.22882	6.12928	5.04439	4.24793	4.75489	6.40939	4.58496	5.58496	7.66534	7.39232	6.64386	6.76818	4	5.32193	3	5.49185	6.22882	1	5.24793	5.16993	5.88264	4.24793	7.56224	8.82655	5.12928	5.20945	4.45943	4.32193	9.36194	5.78136	4	7.26679	7.03342	8.58496	4.52356	10.1724	10.151
CXorf65	1.39003	4.57475	5.32909	1.63925e-07	1.47515e-06	6.68049	UP	5.64386	2	5.12928	5	3.16993	6.76818	7.83289	0	3.45943	3.70044	5.04439	6.52356	5.16993	5.08746	5.75489	6.12928	5.88264	5.9542	4.32193	4.32193	1	3.70044	6.58496	4.45943	4.24793	5.97728	4.90689	3.58496	4.08746	3.45943	5.42626	6.02237	4.39232	3.45943	5.16993	4.39232	5.20945	8.02237	3.45943	4.70044	4.70044	6.26679
CYBRD1	-1.67572	12.2037	-6.63552	1.035e-10	1.81492e-09	13.8047	DOWN	11.294	12.7326	11.0035	13.3643	12.0967	12.716	14.2885	10.9958	12.63	11.0478	12.5324	12.354	11.8388	13.3015	14.4907	10.3597	11.9436	8.60733	10.2252	8.76818	11.3886	11.7842	11.3276	12.0396	10.9418	10.0485	9.60733	10.3718	10.2324	13.5986	14.4225	11.4481	11.6852	12.9949	11.1523	14.1283	10.9672	9.70563	11.2998	12.4517	13.4371	11.6751
CYP11A1	-1.92544	4.29834	-6.3481	5.831e-10	8.76166e-09	12.1268	DOWN	3.16993	5.67243	1.58496	5.90689	6.70044	5.39232	4.45943	3.70044	4.32193	1	6.37504	4.08746	3	6.14975	6.14975	3.45943	4.70044	3.45943	3.32193	1	5.52356	4.58496	2	6.55459	0	7.2384	1.58496	5.85798	2	4.85798	5.45943	1	2.32193	2	2.58496	5.35755	3.32193	5.2854	3.16993	4.80735	5.80735	4.08746
CYP19A1	2.16268	4.8654	7.50926	3.80378e-13	1.07362e-11	19.2631	UP	4.64386	8.73809	2.32193	6.04439	5.32193	7.40939	7.62205	3.70044	8.02791	4.39232	4.32193	5.9542	6.67243	5.52356	5.45943	6.47573	6.04439	4.9542	4.32193	5.49185	3.32193	6.62936	5.49185	7.32193	4.52356	4.64386	5.64386	5.42626	4.70044	5	7.71425	4.58496	4.52356	4.24793	5	4.90689	3.58496	6.75489	5.52356	5.04439	7.89482	5.83289
CYP1A1	-2.41894	2.58458	-5.50751	6.46537e-08	6.38565e-07	7.57557	DOWN	1	2	0	4.64386	6.50779	2.58496	3.32193	2.32193	0	4.75489	7.30378	0	1	1	7.86419	2.32193	4.58496	1	3.58496	2.80735	4.85798	4.75489	0	2.58496	0	4.58496	0	1.58496	1.58496	1.58496	2.58496	0	2.32193	4.08746	2.32193	0	6.26679	5.78136	0	3.45943	1.58496	0
CYP1B1	-1.3537	9.99788	-3.62737	0.000322757	0.00127948	-0.519652	DOWN	7.53138	11.9936	10.1319	10.8345	6.62936	10.792	13.7434	7.09803	9.91737	5.97728	11.7343	11.3332	9.20945	10.7977	14.2261	5.39232	11.3009	6.42626	7.02237	1.58496	9.41574	9.24317	7.84549	11.0112	6.94251	7.32193	6	8.53138	8.59619	11.5517	12.2972	8.87344	9.90839	12.1079	7.91289	13.2559	8.32193	6	10.7952	10.7356	10.3718	9.29692
CYP1B1-AS1	-1.22996	5.24558	-5.85401	9.89727e-09	1.15465e-07	9.38588	DOWN	2.32193	5.88264	4.39232	6.2854	4.24793	5.04439	8.04439	3.32193	5.88264	3.32193	6.45943	5.16993	4.58496	4.80735	8.12412	5.42626	6.80735	2.80735	4.39232	4.16993	4.70044	6.04439	4.64386	5.88264	3.58496	3.80735	2.58496	3.90689	4.08746	5.80735	6.42626	3.16993	3.80735	5.85798	5.35755	8.01123	4.08746	7.61471	5.04439	6.35755	5.80735	4.80735
CYP24A1	1.63662	4.03894	3.54753	0.000434205	0.001668	-0.795367	UP	1	4.45943	1	7.49185	9.96434	5.70044	4.16993	6.84549	4.08746	3.16993	1.58496	3.58496	4.9542	1.58496	1	5.24793	7.06609	1.58496	6.18982	1	4.70044	6.94251	1	4.16993	0	5.52356	4.24793	5.24793	0	11.1923	3.90689	1.58496	3.58496	10.1447	4.08746	3.16993	4.39232	7.53916	2.80735	3.32193	2.32193	5.08746
CYP27B1	2.21279	7.50107	9.58257	9.58514e-20	9.50824e-18	34.1339	UP	6.74147	6.88264	7.49185	9.74315	8.67596	9.64386	6.59991	6.53916	8.65105	8.61839	6.10852	8.76155	7.39232	7.59991	6.35755	6.64386	6.20945	6.76818	8.77479	7.18982	7.46761	7.21917	8.98868	9.32193	8.60363	8.15482	5.61471	5.42626	10.3163	5.83289	7.99435	8.98299	8.31288	8.49985	6.76818	6.22882	8.67243	7.67948	6.26679	4.39232	8.61471	8.53916
CYP2AB1P	-2.21566	2.43529	-5.58109	4.37357e-08	4.4818e-07	7.95212	DOWN	2.80735	0	0	2.58496	1.58496	0	2.80735	4.32193	1.58496	2.58496	0	2.80735	0	5.67243	0	2.80735	6.08746	2.58496	2.80735	1	7.24793	5.20945	1	1.58496	2.58496	7.55459	1	1.58496	0	0	4.24793	3.16993	2.32193	1	7.24793	0	6.87036	6.84549	3.58496	3.16993	4	2.58496
CYP2B6	2.91555	7.67947	5.25054	2.44985e-07	2.12181e-06	6.29447	UP	6.90689	6.2854	7	12.6806	10.5088	12.1721	7.36632	1.58496	10.3072	9.71596	9.12928	6.26679	3.70044	8.45943	5.2854	7.29462	6.72792	13.9538	9.81858	6.64386	7.77479	9.35755	7.67948	12.511	10.128	12.1932	4.08746	9.64386	1	12.7172	5.93074	6.2854	11.9031	5.39232	8.37938	6.55459	5.93074	10.4252	8.39232	6.20945	2	9.54689
CYP2C18	-1.5597	8.78351	-3.45364	0.000611192	0.00225693	-1.11226	DOWN	10.2656	5.04439	8.73471	3.70044	4.70044	10.4778	10.8049	10.0741	9.67419	8.78463	8.88264	7.43463	5.2854	10.9076	6.90689	7.35755	11.0908	6.14975	3.80735	8.03892	10.6742	8.96	11.5372	10.9151	6.87036	7.17991	10.3264	9.24793	6.71425	4.85798	9.44708	8.98868	10.4919	10.5708	12.0365	6.56986	11.1124	8.35755	9.27845	4.52356	7.6865	10.7871
CYP2D8P	1.11358	4.93661	5.47368	7.72709e-08	7.49515e-07	7.40393	UP	3.70044	3.90689	3.45943	5.39232	6.35755	7.14975	6.20945	4	5.24793	4	3	3.90689	6.39232	4.32193	5.55459	5.04439	6.50779	3.16993	5.75489	4.52356	5.12928	6.50779	5.16993	5.90689	4.32193	5.61471	4.90689	2	4.75489	4.45943	5.93074	5.78136	2.32193	4.39232	4.75489	4.80735	6.42626	6.64386	3.16993	4.08746	6.04439	5.52356
CYP2W1	2.08821	8.12089	3.87858	0.000122513	0.000537643	0.385276	UP	4	4.85798	12.809	11.6865	8.37069	8.85487	7.74819	6.61471	9.40514	5.61471	6.79442	9.69	4.39232	8.13443	6.76818	11.137	6.90689	13.5204	11.4041	11.8838	9.13186	7.33092	9.56224	14.0953	6.96578	10.5196	8.09276	6.55459	4.08746	5.08746	4.32193	5.78136	14.8205	6.04439	10.2467	5.67243	9.57554	11.7859	6.90689	7.04439	7.26679	8.46352
CYP39A1	-1.04447	6.93862	-3.8273	0.000149949	0.000645903	0.195974	DOWN	3.70044	8.13443	5.83289	7.36632	9.57743	8.71081	7.65105	5.58496	8.25739	3.58496	7.04439	6.58496	5.49185	6.85798	9.25267	9.06878	6.12928	4.16993	7.98868	7.7211	5.90689	7.98868	8.62936	8.65464	7.53138	5.58496	4.9542	6.18982	2.58496	7.80735	8.23362	4	6.70044	7.33985	5.45943	9.46761	4.90689	7.84549	6.24793	7.20945	7.8392	6.12928
CYP3A4	-2.71487	5.25376	-5.15255	4.0164e-07	3.30733e-06	5.82	DOWN	2.58496	3	2	3	3.80735	4.85798	9.59991	3	8.62936	3.58496	7.7879	5.2854	2.80735	8.63662	4	6.22882	2.80735	3.45943	3.90689	3.45943	5.90689	3.70044	10.96	5.20945	7.60733	6.78136	2.58496	2.32193	2.32193	2	3.58496	7.20945	4.9542	8.90989	7.8009	3.58496	6.50779	5.55459	4.80735	4.75489	4.32193	7.75489
CYP4B1	-2.99081	5.27199	-7.33184	1.23762e-12	3.16348e-11	18.1126	DOWN	7.06609	7.54689	0	5.45943	4.75489	5.35755	5.70044	6.74147	2.32193	6.61471	6.2854	2.80735	1	7.53916	3.70044	3.32193	6.2854	4.39232	5.32193	10.6138	8.37069	5.52356	4.80735	6.59991	6.14975	2	4.75489	8.92481	0	4.08746	3.16993	3.70044	4.24793	4.16993	8.9629	5.04439	5.2854	7.2384	7.7211	4.64386	3.90689	4.39232
CYP4F12	-1.43394	8.99664	-4.0335	6.56415e-05	0.000306046	0.971376	DOWN	11.1586	9.48985	8.28077	7.8009	10.6129	11.3219	11.1991	7.16993	9.90388	9.77972	10.1997	6.65821	6.06609	10.1774	7.15987	11.823	9.64024	9.53916	8.29921	11.8933	9.50383	9.44087	11.1248	10.5718	11.2107	4.70044	10.888	8.99718	2.80735	9.97154	6.10852	10.1948	9.52356	8.71425	9.65821	8.40514	10.9352	9.64746	8.61471	7.56224	8.20945	10.5068
CYP4F2	-1.21492	5.53337	-2.28386	0.0228949	0.0535738	-4.37669	DOWN	4.16993	10.3343	2.32193	7.69349	5.24793	9.24079	6.32193	2.58496	4.52356	4.64386	9.81057	3.16993	3.58496	7.8009	1.58496	5.97728	6.04439	6.62936	7.19967	11.2119	4.90689	4.75489	11.2574	8.77808	10.2866	7.16993	2	3.45943	1.58496	4.64386	3	9.30378	3.80735	5.20945	9.81378	6.02237	4.9542	8.8857	2	10.5831	1.58496	4.80735
CYP4F22	-1.73382	4.54146	-5.59057	4.15754e-08	4.28486e-07	8.00094	DOWN	4.24793	3.58496	5.80735	5.58496	3.16993	4.39232	6.49185	6.40939	3.16993	2	2.58496	6.04439	4.70044	5.75489	4.08746	5.04439	6.49185	2.32193	4.45943	3.58496	6.10852	4.24793	1.58496	3.45943	4.32193	2.58496	4.90689	5.49185	4	5.64386	4.08746	4.45943	1.58496	3.45943	4.32193	1.58496	4.64386	7.5157	2.80735	4.32193	3.80735	5.42626
CYP4F29P	-2.08553	3.02788	-5.1629	3.8133e-07	3.15684e-06	5.86978	DOWN	1	1.58496	2	3	1	7.56986	7.22882	4.90689	1	2.80735	3.32193	1	2	2.80735	5	2.32193	4.24793	3	1	0	2.80735	2.58496	5.80735	2	2.32193	2.32193	0	9.44087	1.58496	3	3.70044	3.45943	1.58496	5.85798	2.32193	3.80735	6.52356	3	2.32193	4	3.58496	4.80735
CYP4Z2P	-1.33152	1.20987	-5.30878	1.81961e-07	1.61952e-06	6.58016	DOWN	0	0	1	3.58496	1.58496	0	3.16993	0	0	0	0	0	0	0	1.58496	1	4.90689	0	3	3.32193	2.58496	4.58496	1	2.58496	1	0	1	3.45943	0	0	0	0	0	0	2.32193	1	1	5.80735	0	3.45943	0	1
CYP7A1	-1.15237	1.92888	-3.80923	0.000160931	0.000687484	0.12982	DOWN	0	2	0	4	1.58496	2.32193	3.70044	1.58496	1.58496	2	2.32193	0	2.58496	1.58496	3.32193	5.67243	4.80735	4.39232	2	1	0	4.90689	1	4	1.58496	1	0	0	2	0	3.70044	1	0	1.58496	2.58496	2.58496	0	7.37504	0	4.24793	0	2.58496
CYS1	-1.65215	7.7504	-4.87639	1.55283e-06	1.12003e-05	4.52518	DOWN	4.39232	6.9542	6.74147	9.79604	5.08746	7.59991	8.43463	5.08746	8.07682	4.70044	7.8009	7.98868	7.94251	7.77479	11.8773	4.24793	6.89482	8.86728	6.88264	4.52356	5.70044	8.29002	6.84549	10.062	5.52356	5.16993	5.67243	6.24793	4.80735	10.1163	9.15228	6.93074	7.84549	8.76818	5.80735	11.5275	5.49185	7.29462	8.74483	10.3923	8.04985	6.33985
CYSLTR1	-1.29721	7.52941	-5.85978	9.58558e-09	1.12328e-07	9.4168	DOWN	6.65821	7.60733	7.65821	7.75489	4.70044	7.20945	10.6421	5.32193	7.06609	4.39232	9.15987	8.224	6.42626	8.98868	9.45121	6.85798	8.66178	6.45943	5.39232	5.04439	6.12928	7.89482	5.97728	6.16993	6.14975	6.65821	6.24793	6.47573	7.53138	8.26209	7.91289	6.85798	7.24793	8.42206	6.70044	9.79116	7.91886	5.52356	7.33092	7.18982	6.16993	8.13955
CYTL1	-1.35424	5.55395	-5.19193	3.29567e-07	2.76862e-06	6.00976	DOWN	5.20945	6.22882	5.42626	6.61471	4	5.88264	7.15987	1.58496	6.10852	2	7.42626	6.67243	5.08746	5.45943	8.02237	2.80735	5.45943	3.80735	3.70044	4.90689	4.85798	5.90689	6.16993	3.32193	5.75489	4	2.58496	4	5.97728	6.50779	5.52356	4.80735	6.14975	8.20457	3.70044	7.89482	4.45943	4.70044	6.08746	5.72792	8.43463	4.80735
CYTOR	1.21756	9.23027	7.27953	1.74555e-12	4.32257e-11	17.7774	UP	9.7879	8.86419	10.5546	10.1536	8.21432	10.0808	8.8857	7.01123	9.69	8.43879	8.18488	8.94837	9.81858	8.90087	9.66178	8.81698	9.38586	8.29002	9.26209	8.09803	8.19967	9.45533	10.6257	8.31288	9.03617	9.91886	9.5411	8.53528	10.9766	9.53722	10.4284	9.16491	10.4818	10.1085	9.51767	9.06878	8.50779	8.03892	9.37504	7	10.6475	9.84235
DAAM2	-1.63803	10.0535	-6.6734	8.20536e-11	1.47679e-09	14.0303	DOWN	8.66178	11.0105	9.33762	10.9256	11.7916	9.79442	11.4939	8.07146	10.5382	8.59619	9.68825	10.0967	9.02791	10.8082	13.2478	7.88264	9.58871	7.78136	6.72792	8.31288	8.45943	10.3565	9.57554	8.71768	7.87652	8.3443	7.18982	7.84549	8.61839	11.7224	10.5216	8.89482	10.0566	10.7838	10.7228	13.9031	9.17243	8.02237	10.5546	11.3426	11.0314	9.28309
DAB1	-3.01361	5.75804	-9.02899	7.02295e-18	5.10983e-16	29.9234	DOWN	1.58496	6.93074	2	7.78136	6.02237	6.76818	5.64386	4	5	1.58496	4.24793	6.02237	6.33985	6.30378	7.5157	5.70044	6.56986	2	5.08746	7.33985	5.08746	5.85798	5.80735	5.2854	7.18982	7.63662	0	7.43463	5.16993	5.39232	5.08746	5.90689	4.70044	8.37504	3.32193	5.42626	5.42626	7.92481	4.85798	5.61471	10.8194	7.12928
DACH2	-1.14189	2.99016	-3.46648	0.00058352	0.00216576	-1.06938	DOWN	4.39232	7.32193	1	4.39232	3.90689	3	3.16993	2.32193	4.64386	1	2	2.32193	2.58496	6.14975	3	2.80735	5.04439	1.58496	2.80735	0	3.32193	3.45943	5.16993	10.0485	1.58496	0	2.32193	2.32193	1	6.16993	4.16993	2.80735	0	1.58496	2.58496	2.58496	3.70044	5	0	3.80735	2.80735	3.16993
DACT3	-2.03516	9.06416	-6.97063	1.28145e-11	2.69262e-10	15.8359	DOWN	7.93074	9.79116	8.09803	9.83763	7.36632	8.30378	9.86264	6.08746	9.62936	6.56986	9.67948	10.3476	8.44708	9.86109	13.6248	6.02237	9.05528	6.55459	7.72792	6.90689	6.96578	9.85019	8.73132	8.05528	7.2384	6.53916	6.84549	7.62205	7.05528	11.5627	10.7773	7.74819	10.2574	9.98584	8.60733	13.3836	7.02237	8.33985	10.9337	11.6698	9.84392	7.41785
DAPL1	-1.24934	4.451	-2.48773	0.0132558	0.0335391	-3.90022	DOWN	8.3443	7.84549	1	4.32193	7.2854	6.37504	3.70044	5.93074	2.32193	0	4.70044	3.80735	3.45943	4.45943	3.70044	7.83289	4.75489	3.80735	3.58496	0	4.39232	3.90689	1	9.69	3.90689	2	6.56986	9.61655	0	1.58496	2.32193	3.70044	5.49185	2.58496	5	4.45943	1.58496	6.6865	4.75489	3.90689	5.9542	4.9542
DARS2	1.07849	11.3486	8.05187	9.10142e-15	3.53732e-13	22.9083	UP	10.4126	12.0967	9.94983	12.5589	13.0093	12.7181	11.6644	9.31967	13.3178	11.2726	9.86573	11.6289	10.7541	11.8773	10.4378	11.9267	10.941	11.8517	12.1	11.6693	10.4656	10.058	11.5299	12.9944	12.1633	12.9443	11.2808	9.40939	12.1709	11.5469	11	12.3794	11.0035	11.4372	12.1098	10.1176	11.9826	10.2336	10.6564	9.11894	10.5641	10.3587
DAW1	1.038	2.75747	3.217	0.00139908	0.00470692	-1.87527	UP	0	0	0	5.16993	5.45943	3.16993	3.80735	4	4.32193	1	1	1.58496	1.58496	2.32193	6.06609	3.45943	6.42626	1	4.64386	2	2.58496	6.2854	2	2.80735	0	6.35755	2.32193	2.32193	0	0	6.62936	0	0	3.58496	5.39232	1.58496	5.39232	6.59991	4.64386	3.70044	3.58496	3.80735
DBF4	1.56119	10.2064	10.7116	9.45888e-24	2.10964e-21	43.1902	UP	9.97441	9.42626	10.0835	10.3038	10.341	10.8178	10.2969	8.29462	11.2986	10.5245	8.90388	11.6078	10.4666	10.733	9.69523	10.5821	10.446	10.5324	11.4367	10.9166	9.35094	10.3718	9.77643	11.5033	11.2003	10.5727	10.4574	8.57365	11.1299	10.6303	10.0901	11.272	9.07146	10.7237	10.7381	9.15735	11.6152	10.1124	9.41151	8.35315	10.2912	10.8619
DBF4B	1.01571	9.29672	7.96812	1.63886e-14	6.04587e-13	22.3335	UP	9.0607	10.0196	8.66178	9.89026	11.6578	11.1972	9.783	7.49985	10.0112	9.43671	8.30834	9.04439	9.81698	9.49586	9.47371	9.00843	9.5157	9.03617	10.5622	9.50581	8.17493	10.1319	10.1085	9.66888	9.00562	9.51175	9.18735	7.83289	10.6883	10	9.54496	10.1267	8.98868	9.86728	9	9.224	10.0417	10.2288	8.79116	7.8392	9.41574	9.65284
DCAF12L1	-2.24586	1.21141	-7.67863	1.2102e-13	3.74067e-12	20.3807	DOWN	0	0	0	1	0	0	2.58496	1	0	0	0	0	1.58496	0	1.58496	1	5.85798	0	3.32193	1	1	2.32193	0	0	0	1	0	1.58496	0	0	0	1	0	9.9542	1	2.32193	0	2.80735	0	2.32193	4.90689	1
DCAF12L2	-2.10123	2.36213	-6.51359	2.17059e-10	3.55248e-09	13.0855	DOWN	0	3.90689	2.32193	5.61471	3.70044	3.16993	1	3.16993	0	0	1.58496	3.90689	1.58496	3.16993	7.34873	0	2.32193	2	0	0	2	3.90689	4	4.80735	1	0	2.32193	1	1	4.64386	3.90689	1	2.80735	2.80735	2	5.90689	0	3.32193	4.52356	3.80735	4.85798	2
DCAF13	1.17437	11.4433	9.34522	6.16193e-19	5.30984e-17	32.3089	UP	10.9564	10.8329	10.236	11.7616	12.3559	13.6485	10.9144	9.55842	12.6506	12.0627	10.8455	12.1805	11.2814	11.7809	10.9908	12.2384	11.0063	11.4732	11.7574	12.4265	11.3021	11.4848	10.8903	11.4242	12.7266	11.0821	11.7871	9.50779	12.5127	11.6622	11.6202	12.3883	11.3674	12.3971	12.4821	10.6046	11.9593	12.0147	10.6202	9.45121	11.0464	11.2738
DCAF4L1	1.39499	4.16379	6.19686	1.41399e-09	1.94326e-08	11.2683	UP	2	2	1	4.90689	7.35755	5.55459	6.64386	4.16993	4.45943	3.16993	2.32193	3.58496	6.06609	3.16993	4.85798	5.12928	5.16993	4.52356	4.90689	4.70044	3.32193	6.90689	6.12928	5.72792	4.08746	4.39232	3.58496	3.16993	5.52356	3	5.35755	3.80735	2.58496	6.35755	3.90689	3.32193	5.08746	6.87036	3.45943	4.52356	5.42626	5.2854
DCBLD1	1.10351	10.4654	9.21023	1.75248e-18	1.4005e-16	31.284	UP	11.1724	10.6202	10.0334	11.9567	10.9256	11.1954	10.3837	8.94544	11.4893	10.0168	9.49386	11.1472	11.807	11.2174	10.8933	10.6248	10.4969	9.83289	10.4686	10.42	8.19476	10.1886	11.117	10.2538	11.2674	9.79604	9.74483	8.62205	10.8297	11.7867	11.9549	11.6106	10.4051	11.4893	10.5018	9.13443	11.0701	9.18239	9.88417	8.14975	12.9136	10.7599
DCDC2	1.76519	6.66741	3.63409	0.00031472	0.00125154	-0.496179	UP	7.67948	5.72792	3.32193	9.49386	7.96	10.3565	8.62571	4.16993	9.08746	1.58496	1.58496	0	7.9542	5.35755	7.53916	3.80735	6.70044	9.65821	9.30834	2	6.90689	5.55459	10.7296	11.0334	9.93369	9.783	5.58496	6.75489	1.58496	3	3.16993	2.58496	5.20945	10.9564	4.52356	2.58496	5.24793	9.44294	8.81378	4.16993	7.06609	8.03342
DCHS2	-1.64858	6.54843	-4.03466	6.53318e-05	0.000304727	0.975826	DOWN	2	5.61471	7.29462	8.73471	5.64386	7.50779	8.7211	8.20457	5.72792	7.98299	2.58496	6.2854	8.87652	12.1526	10.5546	5.58496	9.69697	1	5.16993	3.58496	7.45121	6.04439	4.32193	9.65284	1	3	4.70044	5	0	8.0607	5.32193	1.58496	7.43463	7.21917	8.11374	7.06609	10.1396	7.07682	6.87036	7.84549	9.26679	10.4284
DCLK1	-1.69419	8.04436	-5.39656	1.1564e-07	1.07552e-06	7.01598	DOWN	4.85798	8.36194	6.84549	9.31061	5.35755	9.30834	11.314	5.08746	8.6865	4.80735	9.81858	8.91886	7.67948	9.57932	12.0272	5.58496	8.87036	4.58496	4.45943	4.52356	7.03342	7.11894	6.32193	9.94837	5.08746	5.24793	3	7	6.85798	9.34207	8.57743	7.04439	7.13955	8.55459	6.61471	10.5527	6.45943	7.45943	8.78136	9.73132	8.16993	7.49985
DCLK3	2.21478	5.1663	9.64192	5.99258e-20	6.15936e-18	34.5947	UP	4	6.83289	5.20945	7.12928	5.49185	6	5.72792	3.16993	5.58496	4.52356	4.80735	4.39232	5.24793	5.12928	6.49185	4.85798	5.93074	4.45943	4.24793	5.64386	3.58496	4.32193	6.85798	4.70044	5.49185	4.85798	3.45943	0	7.22882	6.52356	5.04439	4.70044	5.83289	7.10852	5	5.52356	5	5.39232	5.39232	4.75489	8.27612	5.2854
DCN	-1.29373	13.9411	-5.16526	3.76853e-07	3.12433e-06	5.88111	DOWN	12.6087	14.8986	12.6702	15.168	10.8162	15.0057	15.6089	11.6371	14.7754	11.3934	15.4098	13.7676	13.7905	14.8042	16.7795	12.9647	13.1983	11.4998	12.6414	12.3707	13.0555	11.7423	12.9993	14.0256	13.0468	11.2125	12.4765	12.3998	13.2547	15.4116	14.9478	13.5482	13.247	15.6973	12.9009	15.3869	12.5299	10.8826	13.6287	14.6858	17.2715	13.4635
DCSTAMP	2.87048	4.3965	8.89844	1.88806e-17	1.27329e-15	28.9544	UP	4.24793	5.85798	5.61471	7.06609	2.32193	6.58496	5.52356	1.58496	6.2854	2.32193	5.80735	3.58496	4.24793	5.85798	4.85798	0	3.70044	3.16993	1	2	3.32193	7.74147	4.70044	3.90689	5.24793	5.93074	2.58496	2.32193	6.32193	6.42626	4.24793	6.88264	2.80735	4.24793	3.90689	3.80735	3.58496	4.39232	4.58496	3.32193	5.61471	4.24793
DCT	-1.63177	2.83278	-5.98189	4.83889e-09	6.00226e-08	10.0775	DOWN	2	2.58496	2	4.24793	6.10852	3.58496	5.08746	0	3.45943	1	3	3.16993	4.70044	2.32193	5.97728	3.32193	5.9542	1	2.80735	2	1	4.85798	2	5.64386	1	0	1	1	1	3.45943	7.22882	0	1	2.32193	2.80735	5.04439	2.58496	6.2854	2.32193	4.32193	2	2
DDC	1.3957	9.66346	3.04397	0.00248648	0.00781008	-2.40058	UP	10.5421	12.3531	10.2396	11.5236	6.97728	12.2509	10.7039	6.08746	12.4168	12.1655	11.3891	12.2291	5.24793	11.0848	8.8009	12.2149	11.0375	12.2992	10.2935	9.58684	8.15987	5.49185	11.3701	12.7305	12.0098	9.61471	10.7237	8.09803	8.82337	11.2848	7.69349	12.3669	11.9447	7.31288	12.1599	8.0607	10.9571	11.1046	10.0307	9.15482	3.80735	9.31288
DDIAS	2.32584	8.88804	11.3827	3.01762e-26	1.12874e-23	48.8394	UP	8.3443	8.32193	8.31741	10.4788	10.388	10.9352	8.64746	7.08746	10.2935	9.02514	6.9542	9.09803	9.39874	9.34207	7.21917	8.89482	9.06878	9.24793	10.1344	10.1749	8.46352	8.33092	8.84862	9.68825	9.67066	9.26913	8.59246	7.21917	11.1189	8.58496	9.24793	9.9901	8.14466	9.95855	10.2935	6.90689	10.6046	8.71768	7.69349	6.40939	8.81698	9.71253
DDO	-1.28994	5.95279	-4.78361	2.41245e-06	1.67152e-05	4.10441	DOWN	6.88264	8.06609	5.45943	7.03342	6.49185	6.33985	5.88264	4.24793	5.52356	2.32193	5.04439	6.33985	7.58496	6.47573	7.47573	3.58496	4.9542	7.55459	3.45943	2.32193	3.80735	5.90689	3.80735	7.17991	4.80735	6.50779	4.45943	4.75489	9.68825	6.02237	6.49185	5.52356	5.32193	5.83289	5.67243	8.01123	5.24793	6.35755	6.10852	5.75489	5.35755	4.85798
DDX11	1.2876	10.5717	8.74089	6.14986e-17	3.72088e-15	27.7977	UP	9.83763	10.5459	9.36413	11.1209	11.7194	12.1296	11.7698	10.7022	11.7022	10.446	10.1611	10.363	11.8045	10.9751	10.6555	10.3554	9.96723	9.82018	11.5618	10.7822	9.5216	11.6996	12.2318	11.9498	11.5401	10.7838	11.0748	8.81698	11.2906	10.8734	12.958	12.2802	9.783	10.2491	11.0868	10.2726	11.9996	11.1724	9.42836	9.40939	10.7895	10.2538
DDX11-AS1	1.18443	5.2506	5.86872	9.12125e-09	1.07403e-07	9.46477	UP	3.90689	5	3.70044	5.90689	6.67243	6.79442	5.16993	4.08746	5.2854	5.39232	4.39232	6.35755	5.61471	4.70044	4.52356	4.75489	5.83289	3.32193	6.56986	6.45943	5	6.20945	6.64386	8.30378	5.75489	4.85798	5.88264	2.58496	6.61471	6.55459	8.29921	5.55459	3.80735	6.16993	5.32193	5.08746	6.56986	6.55459	4.58496	4.64386	5.32193	5.04439
DDX21	1.12812	13.1343	10.4567	7.9879e-23	1.45764e-20	41.0941	UP	12.2744	12.1938	12.0379	14.3426	14.3183	14.5831	13.2061	11.5299	13.9991	12.9674	12.1564	13.4808	13.8476	13.7502	12.9678	13.5933	12.9248	12.9421	13.7814	13.6451	12.4689	12.007	13.7089	13.7491	13.9819	13.2802	13.2612	10.7313	15.4232	13.025	14.3076	13.8057	13.2518	13.3198	15.0248	12.461	14.2321	12.9138	12.0095	10.3343	13.1757	13.6464
DDX25	-1.20233	2.79753	-4.39908	1.39035e-05	7.50466e-05	2.43783	DOWN	2	3.45943	2.58496	3.45943	2.80735	2.58496	5.08746	2.32193	2.58496	1	3.70044	3	2	2.80735	5.58496	3	5.83289	2.32193	2.32193	3	3.58496	4.9542	1	5.39232	1	6.93074	0	1	0	1.58496	2.80735	3	1.58496	2.58496	2.58496	4.08746	2.32193	6.10852	2.58496	4.64386	2	3.32193
DDX4	1.07247	2.09432	3.03474	0.00256214	0.00802187	-2.42784	UP	3.58496	0	0	6.16993	1	2.32193	4.70044	2	3.32193	0	2.32193	0	2	0	1.58496	4.45943	7.48382	0	5.61471	0	2	6.88264	1	3.16993	0	8.29921	0	0	1	4.45943	2.80735	0	0	0	5.16993	3.58496	3.16993	8.03892	2	3.80735	1	1.58496
DEFA5	-4.04132	2.84323	-5.88335	8.40791e-09	9.95071e-08	9.54345	DOWN	5.35755	4.08746	0	3.32193	2	5.78136	1	1	1.58496	1	2.58496	0	3	9.23122	6.71425	13.3108	3.70044	0	6.93074	0	0	3	1	1.58496	0	4.16993	0	1	1	7.40088	0	1	6.39232	0	5.9542	0	1	9.48382	1	7.97154	0	0
DEFA6	-3.05906	2.8142	-4.63784	4.75326e-06	2.8327e-05	3.45784	DOWN	3.58496	3.45943	0	3.45943	1.58496	5.16993	1.58496	0	0	0	3.70044	0	2.32193	9.40727	4.70044	13.6753	1.58496	0	6.47573	1	0	1.58496	0	4.08746	0	6.96578	1.58496	0	0	6.35755	0	0	2.58496	0	4	0	0	9.13699	1.58496	11.8929	0	0
DEFB131A	-1.80876	0.492889	-8.98988	9.45402e-18	6.72102e-16	29.6321	DOWN	0	0	0	1.58496	0	0	1.58496	0	0	0	2.58496	0	0	0	0	1	2.32193	0	1	0	0	2.80735	1	1.58496	0	0	0	0	0	0	0	0	0	1	1.58496	0	1.58496	3.45943	0	0	0	1.58496
DEFB4A	-1.53166	1.26988	-4.70358	3.50832e-06	2.35248e-05	3.74719	DOWN	1	0.5	0.5	0	0.792481	1.85022	0.5	1.95345	0	0	0	0	0	0.792481	0	0	3	3.30735	0	0	1.72972	1.5	1.5	0	2.62396	4.09491	2.29248	0	0	0.5	0	0.792481	0	0	0	0	2.58496	1.40368	1	1.29248	0.5	2.16096
DENND2C	-1.29179	7.4014	-5.40047	1.13314e-07	1.05735e-06	7.03553	DOWN	5.16993	5.2854	5.16993	7.97154	7.30378	6.9542	7.88874	8.50779	8.224	6.62936	5.9542	6.9542	9.40088	9.1472	8.9571	5.75489	7.87036	6.6865	7.37504	4.45943	6.56986	7.61471	9.01123	6	5.55459	7.78136	6.02237	9.56796	5.24793	7.49185	7.33985	5.88264	7.11894	6.82018	8.37504	8.64386	7.87652	7.67948	6.22882	6.94251	7.82655	7.2854
DEPDC1	2.36983	9.7468	10.3768	1.54915e-22	2.63001e-20	40.4435	UP	9.27612	10.643	9.06609	10.6375	10.3309	11.5358	8.51175	8.12928	11.0701	10.5304	8.55459	10.9009	10.0875	11.2252	8.67596	10.5098	9.19476	9.29921	10.9211	11.5732	8.84235	9.63481	10.7549	10.697	11.5416	10.6874	9.91886	8.03342	12.1655	9.84392	10.0848	11.3354	8.81378	11.0821	10.4126	6.90689	11.0614	9.29232	8.62571	7.36632	9.9542	9.91886
DEPDC1-AS1	1.06636	2.2752	4.58183	6.13998e-06	3.56146e-05	3.21418	UP	2	1	2.32193	3	1.58496	4.80735	2.58496	1	1.58496	3	2	3.70044	2	2.58496	0	2.32193	3.80735	2	4.24793	3.45943	2	4.08746	2.80735	2.58496	2.58496	4.85798	3	2.58496	1.58496	1.58496	3.90689	3.90689	1.58496	2.58496	2.58496	0	3.32193	5.42626	1	0	1.58496	1.58496
DEPDC1B	2.37537	9.55022	10.9616	1.13598e-24	3.00498e-22	45.2729	UP	10.23	9.86109	9.65642	10.9944	8.73132	11.218	9.19476	6.47573	10.8122	10.3038	8.66534	10.6466	10.128	10.8994	7.65821	10.3061	9.56986	11.0539	10.6546	11.3202	8.74147	10.0014	11.6795	12.7773	10.7928	10.0512	10.5177	8.12928	11.5599	10.3576	9.0634	11.1886	9.02791	10.1599	10.1033	6.70044	10.6698	9.87652	8.47168	7.25739	8.54689	9.87036
DES	-3.67872	12.4536	-5.84749	1.02617e-08	1.19268e-07	9.35095	DOWN	11.5122	14.0651	12.7807	15.0743	6.9542	11.1306	9.34207	10.5362	15.513	10.8041	11.5416	17.1265	10.6008	13.9239	20.3879	7.47573	12.581	8.64024	10.1836	6.18982	11.8925	15.3481	8.9542	10.7524	9.05257	7.19967	11.3772	11.8412	5.45943	16.5161	11.7964	6.18982	14.4314	14.5294	12.4497	20.3209	9.35755	9.93221	16.88	18.6623	11.2726	11.7082
DGKB	-1.74835	4.56329	-4.91234	1.30664e-06	9.57848e-06	4.6902	DOWN	3.70044	5.39232	4.16993	5.08746	1	4.39232	6.14975	2	5.12928	4.64386	3.58496	7.33985	5.90689	4.24793	7.84549	5.04439	7.15987	3.90689	4.45943	5.04439	3.58496	7.90689	5.72792	8.20945	4.08746	1.58496	2.58496	1.58496	2.32193	5.75489	5.32193	3	5.64386	4.70044	5.20945	7.30378	2.58496	8.50779	5.32193	5.39232	3.45943	2.58496
DGKG	-1.99911	7.76839	-7.52706	3.37548e-13	9.69571e-12	19.3797	DOWN	5.45943	9.72451	6.22882	7.49985	9.12153	7.11894	9.17991	4.75489	8.65105	4.80735	7.2384	7.81378	6.20945	7.93074	11.1248	8.17991	8.75489	7.25739	6.26679	4.16993	6.10852	8.19476	8.5157	9.90689	4.70044	4.39232	7.61471	5.16993	6.70044	8.07682	9.26444	9.01123	7.99435	7.09803	7.59991	10.9352	6.53916	9.11894	7.64386	8.98299	6.6865	6
DGKI	1.40568	6.49072	5.94736	5.87762e-09	7.16314e-08	9.8895	UP	4.24793	6.58496	6.33985	8.13955	5.70044	7.05528	5.58496	4.80735	7.27612	4.16993	4.39232	8.20457	6.79442	6.76818	10.8361	5.75489	7.42626	4.75489	5.39232	3.58496	5.75489	7.65105	6.93074	5.88264	5	5.42626	5.04439	4.24793	5.61471	9.49386	7.02237	6.02237	6.16993	8.83289	7.31288	10.9715	5.2854	7.55459	7.32193	9.06878	8.69349	5.32193
DGKK	-1.62015	1.52488	-5.15936	3.88157e-07	3.20559e-06	5.85276	DOWN	0	0	0	4.58496	0	1.58496	1.58496	1.58496	0	0	0	0	0	1.58496	2.58496	3.32193	5.64386	1	1.58496	0	0	3.32193	1	2.58496	1.58496	6.49185	0	1	0	2.32193	1.58496	2	2	1	2.32193	0	0	4.75489	1.58496	3.90689	2	0
DHRS2	1.91957	6.37863	4.07427	5.55149e-05	0.000262854	1.12913	UP	8.16993	7.40088	7.06609	8.633	6.58496	6.45943	6.79442	11.3772	5.90689	15.0818	1	9.76321	8.70044	4.75489	4.24793	5.35755	6.24793	5.80735	7.77479	9.96867	4.39232	6.44294	6.90689	8.32193	9.48985	7.67243	5.12928	4.80735	4.64386	5.55459	5.70044	3	8.25267	5.61471	5.80735	4.08746	7.47573	6.24793	6.85798	5.32193	4.08746	10.6847
DHRS7	-1.06684	11.3087	-8.07718	7.61303e-15	3.03489e-13	23.0829	DOWN	11.3614	12.1529	9.27845	11.5033	11.7406	11.7859	11.6371	10.6804	11.4589	11.9527	11.2101	11.5498	11.8868	11.9043	11.5774	9.71081	9.99859	12.3848	11.2414	11.4752	11.2222	10.9091	11.6502	11.2842	11.7536	9.83763	11.5353	9.99577	12.3443	12.2276	11.8903	11.2131	12.1092	11.3734	10.9607	11.2779	10.8611	10.4696	12.2814	9.72622	11.5275	12.0206
DHRS7C	-1.30159	0.687748	-8.66447	1.08511e-16	6.27599e-15	27.2417	DOWN	0	0	0	2.80735	1	3	2.58496	0	1	0	1.58496	0	0	2.32193	0	1.58496	4.39232	1	1.58496	0	0	3.45943	0	1.58496	0	1	0	0	0	0	1	0	1	0	2	0	0	5.75489	0	1.58496	1	1
DHRS9	-1.34412	7.33667	-3.30276	0.0010421	0.00362271	-1.60467	DOWN	9.7211	6.39232	5.93074	6.6865	4.16993	7.70736	8.81378	5.55459	11.3247	4.90689	7.40939	6.70044	5.80735	7.72792	5.55459	8.40514	5.97728	5.78136	5.72792	5.16993	7.92481	6.85798	13.7659	4.08746	7.76818	6.06609	11.0133	7.74147	4.85798	8.99435	5.9542	10.5372	4.85798	6.24793	7.37504	4.24793	9.17493	6.12928	6.9542	4.70044	8.21917	9.93958
DIAPH3	1.77675	9.5183	8.96402	1.15023e-17	7.99399e-16	29.44	UP	9.69697	10.1762	9.11894	10.1561	11.2621	11.5013	8.39232	7.05528	10.6393	10.4409	9.13443	10.4696	10.9944	10.6555	10.5536	10.3287	9.04439	9.42206	9.40939	10.4471	8.52748	9.01959	10.3783	12.7356	11.3864	10.2889	9.74819	7.6865	12.057	10.1935	9.57554	10.8416	9.224	9.44915	10.6101	8.92778	11.1293	10.4778	8.37504	8.45533	9.80735	10.1228
DIO2	1.23375	10.9444	5.14607	4.14866e-07	3.40556e-06	5.78893	UP	9.98726	10.9009	10.4419	12.8498	8.07146	11.7478	10.2348	8.82655	11.9263	9.18488	11.2015	9.08481	10.6812	12.7469	13.3803	11.0614	10.3264	9.74315	9.56605	9.35975	9.57365	10.1421	10.5575	11.4599	11.4115	9.17493	9.55842	10.3376	8.75489	12.4863	11.8281	10.7912	10.032	11.9744	11.5784	11.6667	10.6555	10.5971	9.70736	12.0941	12.2264	11.3231
DIO3OS	-1.36152	5.97566	-3.9711	8.46048e-05	0.00038407	0.732738	DOWN	2.32193	5.80735	2.80735	10.0728	10.6448	8.49985	9.10066	4.80735	5	1.58496	6.22882	4.9542	5.55459	6.62936	7.86419	4.9542	4.80735	1	9.69174	4.24793	5.61471	10.0526	3.58496	4.70044	3.70044	4.39232	5	6.40939	2	7.30378	7.72792	5.78136	4.64386	6.88264	2.58496	6.96578	5.20945	7.97154	5.97728	5.85798	6.79442	5.04439
DIRAS1	-2.62797	6.02141	-7.37359	9.39329e-13	2.44437e-11	18.3815	DOWN	4.52356	7.14975	4.80735	7.02237	4.32193	5	7.67948	6.87036	6.47573	4.08746	7.56224	4.64386	9.03067	8.18488	9.22159	2	6.89482	1.58496	3.16993	3.32193	6.87036	6.53916	4.24793	5.39232	2.32193	4	4.58496	6.39232	3	11.0947	5.80735	3.80735	6.58496	4.90689	6.45943	7.39232	6	4.64386	6.56986	6.90689	7.90087	4.08746
DIRAS2	-1.46994	3.00555	-4.0145	7.09397e-05	0.000328059	0.898347	DOWN	0	1	0	3.90689	7.31288	2	8.27146	2	0	1	1.58496	1.58496	0	3.80735	7.59246	1	5.16993	4.45943	3.45943	0	1	4.39232	6.22882	2.58496	0	2.32193	3.32193	2.80735	0	4	4.08746	1	0	4.90689	3.80735	1.58496	2.32193	5.72792	4.08746	4.52356	2.32193	0
DIRAS3	-1.57217	6.26575	-5.72963	1.96186e-08	2.14709e-07	8.72524	DOWN	3.90689	6.39232	5.20945	7.58496	8.13955	6.39232	6.47573	3.80735	6.49185	7.31288	6.80735	8.33092	7.04439	6.39232	9.32643	8.18488	6.37504	2	4.70044	6.33985	5	7.84549	5.08746	4.70044	4.70044	4.90689	3.90689	4.90689	2.58496	6.83289	6.42626	3.80735	7.90087	7.32193	5.83289	8.51964	6.10852	6.47573	5.70044	6.96578	6.93074	5.45943
DISP1	-1.06424	9.24433	-8.29487	1.61276e-15	7.47743e-14	24.6004	DOWN	8.62571	9.09011	7.48382	9.64566	10.9972	9.51373	10.3826	7.92481	10.6502	8.30378	8.29002	9.18239	9.50779	10.6421	10.7108	9.57554	9.83289	8.41785	6.93074	9.00562	8.224	8.43045	9.74315	9.95128	8.95128	8.01681	8.8009	7.94251	8.26209	9.08481	10.8517	8.62205	8.66534	9.52552	10.2808	10.6952	10.3208	8.02791	8.90087	8.76155	9.45738	9.42836
DIXDC1	-1.42476	10.3729	-6.51619	2.13675e-10	3.50887e-09	13.1008	DOWN	7.88264	9.85175	9.57932	11.1299	9.51373	10.6502	10.7125	8.11894	11.3415	9.13955	9.08215	11.4051	10.0688	11.2633	14.391	9.5157	10.2396	7.54689	9.33762	7.2384	9.03617	10.5048	10.0715	10.5265	9.14975	8.90388	10.3309	8.16993	9.88264	11.4528	10.9046	9.54882	9.71081	11.0505	9.87652	14.4084	10.7482	8.77149	10.3061	12.6316	11.7665	9.61839
DKC1	1.21661	12.0966	11.0256	6.57139e-25	1.90036e-22	45.8109	UP	11.5338	11.3015	10.891	12.1941	13.5458	13.7286	12.0751	10.1344	13.0305	12.4445	11.3415	12.5194	12.4584	12.4152	11.762	12.577	11.29	11.9791	14.0444	12.9631	11.8719	12.128	13.0698	13.0058	12.826	12.1095	12.8463	9.65464	13.0065	12.1517	12.5137	12.8537	11.6493	12.8011	12.8376	11.0728	12.3301	12.4197	11.6225	10.2372	11.5108	11.5469
DKFZP434A062	-1.15554	1.75651	-5.19364	3.26742e-07	2.74793e-06	6.01802	DOWN	2	2.32193	0	3.16993	2.32193	2.32193	3.58496	2.58496	1.58496	0	2	2.32193	1.58496	0	3.16993	4.08746	5.16993	1	1	0	0	3.90689	2	2	0	1.58496	1	0	1	1.58496	2.58496	1.58496	2.32193	2	0	5.20945	1.58496	6.30378	1	3.45943	2.32193	1.58496
DKK1	1.33845	7.19543	2.0771	0.03842	0.0828411	-4.81934	UP	9.35535	3.80735	11.1724	6.49185	8.19476	11.7364	8.53528	9.35315	9.56796	2	3.80735	4.08746	3.16993	5.39232	6.80735	2	6.18982	8.60733	2.32193	0	11.0532	10.4848	1.58496	7.7211	0	11.0112	8.8857	9.55842	1	6.59991	15.0928	2.80735	4.32193	11.8941	4.70044	4.08746	5	6.06609	9.07682	4.45943	5.93074	11.0688
DKK2	1.69599	6.86924	5.14383	4.19541e-07	3.43979e-06	5.77818	UP	7.70044	7.04439	8.2854	8.8009	6.02237	7.14975	7.11894	2.80735	9.33092	2.58496	6.80735	8.06609	8.56986	8.10852	9.68825	6.35755	8.12928	4.45943	7.78136	5.61471	5.78136	5.32193	7.67948	7.27612	7.75489	4.16993	5.97728	2.58496	8.33092	11.8584	9.72281	7.35755	8.53528	8.73809	4	8.53138	4.80735	4.64386	8.25739	8.10852	7.56986	4.16993
DKK4	-2.53855	3.68498	-5.54428	5.32088e-08	5.33558e-07	7.76322	DOWN	1	3.80735	3	4.24793	10.8903	3.80735	4.52356	2.80735	8.79116	1	4.70044	4.64386	3	3	3.70044	8.21917	4.90689	3	4.32193	1	0	6.10852	4.32193	0	2	0	3	4.9542	1.58496	4.80735	8.10329	5.49185	7.54689	2.58496	3.45943	4.24793	1.58496	5.42626	0	3.45943	6.10852	2
DLEU2	1.43004	8.49402	8.27899	1.80773e-15	8.34533e-14	24.4888	UP	8.13443	8.46352	7.58496	8.2384	9.52356	9.43879	8.98299	6.65821	10.4336	7.88874	7.71425	8.70736	8.82655	8.41785	8.18488	8.30834	8.79442	9.16993	8.97728	8.50779	7.74819	8.98584	9.11894	12.8009	9.29232	8.8009	8.2854	6.65821	8.56224	8.73471	8.67596	8.62205	8.98584	8.27146	9.783	7.89482	9.33092	8.59246	7.08746	7.10852	8.65105	9.15482
DLEU7	1.76095	5.86996	9.94795	5.17211e-21	6.48871e-19	36.9989	UP	6.42626	6.83289	5.78136	7.11894	7.86419	7.89482	7.17991	3.58496	7.5157	4.45943	4.16993	5.9542	7.33985	7.05528	5.08746	5.49185	6.06609	5.64386	5.55459	5	5.32193	6.87036	7.11894	8.11894	5.70044	6.16993	6.70044	3.58496	6.84549	6.56986	7.30378	6.50779	4.90689	5.85798	5.72792	5.04439	6.02237	4.64386	5.12928	5.12928	6.61471	6.61471
DLG2	-1.59142	6.82961	-6.24977	1.03916e-09	1.47999e-08	11.5667	DOWN	4.16993	7.90087	5.2854	7.48382	5.72792	7.40088	8.57365	6.6865	7.72792	6.12928	6.55459	7.37504	6.62936	7.53916	11.2046	6.18982	7.7211	3.80735	6	5.64386	5.70044	7.06609	5.20945	7.66534	5.20945	7.12928	3.58496	7.36632	7.53138	7.3837	6.56986	4.75489	5.64386	6.90689	6.39232	9.10852	6.91886	7.65105	6.90689	8.32643	7.92481	6.2854
DLGAP2	-1.34703	3.18642	-5.14005	4.27548e-07	3.49787e-06	5.76005	DOWN	1	1	2.32193	4.24793	1	2.58496	5.39232	1	4.58496	0	3	3.16993	6.2854	3.45943	5.97728	3.90689	5.90689	0	4	1	1	4.85798	2.80735	5.32193	0	0	1.58496	3.32193	2.58496	3.45943	4.24793	1.58496	2	2.32193	1	2.32193	3.45943	6.40939	2.80735	4.75489	3.32193	2.80735
DLGAP5	2.51427	10.0543	11.4672	1.44608e-26	5.95983e-24	49.5627	UP	10.5536	10.6046	10.0098	11.1911	10.2877	11.545	9.18735	8.02791	11.2021	10.5108	9.30378	11.2848	11.5063	11.0828	8.73132	10.5689	10.0458	10.6466	11.5727	11.7436	8.91588	10.5018	11.4727	10.8796	11.2258	10.8657	10.825	9.19722	12.1564	10.6591	10.2633	11.5147	11.1137	10.5226	10.9121	7.26679	11.792	10.3253	8.99718	7.65105	10.3696	10.4325
DLK1	-1.40278	2.24159	-3.6247	0.000325998	0.00129083	-0.528951	DOWN	2	0	0	4.80735	0	2	2.80735	2.80735	3.16993	1	4	4.16993	1.58496	1	4.52356	1.58496	4.52356	0	2.32193	0	3.58496	4.08746	1.58496	3.32193	2	2.80735	2.32193	2.80735	0	4.85798	2	2	3.58496	1.58496	3.16993	0	1.58496	5.75489	1.58496	4	0	0
DLX4	1.75871	5.57692	5.30867	1.82063e-07	1.62e-06	6.57963	UP	7.36632	3.58496	5.2854	8.7039	9.20701	9.77643	4.58496	5.42626	4.52356	4.90689	3.45943	5.49185	6.70044	6.04439	5.39232	6.12928	6.08746	5.42626	6.45943	6.78136	6.06609	5.88264	7.10852	7.6865	5.20945	8.26209	4.70044	4.80735	2.58496	4.70044	5.45943	5.35755	6.02237	7.06609	2.80735	4.39232	6.30378	7	4.9542	3.80735	7.04439	5.64386
DLX6	1.36648	4.28848	2.65604	0.00821758	0.0222133	-3.47715	UP	2.32193	5.78136	0	3.70044	9.20701	8.9571	3.70044	6.70044	2.32193	8.56605	4.32193	7.46761	0	7.14975	4.58496	2.58496	5.35755	6.62936	3.90689	6.30378	6.16993	9.24317	2	6.96578	2.80735	6.89482	6.32193	3.45943	2	2.32193	7.54689	7.01123	0	2.32193	2.80735	4.08746	7.04439	5.9542	4.85798	2.58496	1	3.70044
DMBT1	1.87201	12.3407	2.66186	0.00807913	0.0218873	-3.46203	UP	12.8736	13.6139	12.3603	16.6552	7.32193	14.1876	9.32867	9.2384	11.7482	17.6831	16.3608	11.6609	8.26679	16.0622	12.3945	16.3794	11.3712	17.9226	15.1322	14.1368	13.446	11.7969	14.0937	10.6618	17.1181	11.9751	10.7048	9.93517	4.64386	15.6529	13.0144	17.2366	13.4002	10.3761	18.0605	8.30378	11.0868	15.0984	17.5095	8.13443	16.2514	16.2527
DMBX1	3.60544	5.07525	8.27399	1.87387e-15	8.61778e-14	24.4536	UP	6.53916	8.72792	0	5.55459	7.12928	4.16993	4.24793	2.32193	5	7.66534	3.32193	6.26679	6.02237	8.11894	2.80735	5.32193	4.58496	2.32193	8.26679	9.94105	3.58496	5.04439	8.55075	4.39232	8.05528	2	6.45943	4.85798	1	8.52748	5.16993	6.47573	6.53916	6.39232	5.2854	2.80735	8.82972	5.9542	2.32193	5.35755	4.70044	5.49185
DMD	-1.78726	10.1088	-6.29426	8.00792e-10	1.16979e-08	11.8192	DOWN	7.41785	11.0654	9.57743	11.3923	6.58496	10.5718	10.4848	7	12.4273	6.65821	8.73471	11.4853	8.79766	10.6092	14.2937	7.57743	9.93958	9.8392	8.49185	7.2854	8.31288	10.5584	9.20212	10.4062	7.60733	7.30378	8.62205	7.84549	7.91289	11.2568	10.7389	8.73132	9.6865	10.8788	9.70908	14.5447	9.19229	8.54303	10.1674	12.5689	9.73302	9.45533
DMGDH	-1.30182	5.1831	-6.70878	6.59935e-11	1.21794e-09	14.242	DOWN	3.16993	5.42626	4.24793	5.93074	4.16993	4.70044	6.08746	1	4.58496	3.16993	5.04439	4.9542	4.9542	6.42626	7.97154	4.58496	6.53916	2.58496	4.16993	3.58496	4.39232	6.39232	4.64386	5.20945	4.24793	5.2854	3.45943	3	3.70044	5.72792	5.24793	4.24793	3.16993	6.10852	4.75489	7.72792	4.16993	7.04439	4.45943	6.45943	6.24793	3.90689
DMP1	1.756	2.50084	5.24534	2.5154e-07	2.1714e-06	6.26911	UP	0	3.32193	2	5.20945	3.90689	5.85798	3.32193	1.58496	4.16993	0	1	3.16993	3.45943	0	1	4	5.2854	2.80735	4	1	2.58496	6.87036	4.45943	5.90689	2.58496	4.16993	0	4.08746	0	4.39232	7.19967	4.32193	5	5.39232	3.32193	2	2.32193	7	3.16993	3	6.32193	1
DMPK	-1.46217	10.8838	-6.69779	7.06183e-11	1.29628e-09	14.1761	DOWN	10.1331	11.1567	9.40514	10.5784	11.7151	10.0914	11.5122	8.97728	10.5897	9.10066	10.4522	11.8234	10.1293	11.5675	14.844	10.2574	10.5236	9.02237	11.3745	9.41363	9.10591	11.2426	11.0668	10.8887	8.94251	9.66356	9.91886	9.01123	9.62022	12.2986	11.5003	10.4696	10.6257	11.1592	10.5906	14.7781	10.2009	10.585	12.4155	12.8642	11.815	9.77479
DMRTA1	-3.07867	5.27455	-7.26517	1.91779e-12	4.70473e-11	17.6857	DOWN	2.58496	6.52356	2.58496	3.32193	0	8.3837	7.42626	6.97728	3	2.58496	4.80735	3.45943	2.58496	8.2854	6.56986	2	6.6865	5.08746	1.58496	0	7.64386	3.90689	1.58496	1.58496	0	8.95128	9.21432	7.2854	0	5.2854	6.37504	3.90689	2.80735	8.93958	2.80735	6.80735	7.24793	5.88264	6.98868	5.64386	6.64386	5.39232
DNA2	1.95964	9.04052	10.7864	5.02912e-24	1.19176e-21	43.8109	UP	8.44708	8.6865	9.03617	10.3242	10.4419	10.769	9.19967	6.83289	10.6202	9.68475	7.61471	9.77972	9.47776	9.30834	7.90087	9.70736	9.85953	9.73809	10.29	9.76818	8.23362	9.83131	10.0888	11.1755	9.94398	10.3072	9.40514	6.64386	11.03	10.0498	10.224	9.92926	8.57743	8.65464	10.813	7.44294	11.1592	10.0661	7.87652	6.59991	8.87036	9.71081
DNAAF3	1.61037	5.84095	5.62904	3.38263e-08	3.5462e-07	8.19977	UP	7.17991	5.72792	2	6.37504	6.93074	4.32193	6.02237	4.08746	4.64386	6.80735	3.32193	6.49185	7.31288	7.14975	5.39232	5.04439	6.83289	3.58496	7.59246	8.98014	3.70044	6.40939	8.56986	5.83289	8.97728	6.58496	7.69349	4.39232	10.9166	8.05528	5.93074	7.42626	5.55459	7.3837	6.61471	3.16993	7.76155	7.56224	5.70044	3.80735	4.80735	4.52356
DNAAF4	1.01679	5.69183	5.10691	5.04313e-07	4.07222e-06	5.60171	UP	4.45943	4	5.39232	7.48382	7.06609	5.88264	7.02237	3.16993	6.53916	5.70044	2	6.08746	6.45943	6.47573	6.22882	6.18982	6.55459	6.30378	5.35755	3.45943	5.55459	6.91886	6.89482	5.04439	6.37504	6.30378	6.79442	2.58496	5.90689	4.52356	6.30378	6.65821	6.06609	5.83289	6.70044	6.06609	6.40939	7.84549	5.75489	4	4.70044	6.65821
DNAH14	1.13018	7.52582	3.71407	0.00023244	0.000955061	-0.213725	UP	4.39232	4.9542	4.16993	9.15228	9.8392	10.5536	7.18982	7.24793	9.15735	7.8009	5.20945	9.46148	9.54496	6.35755	8.224	7.57743	8.56605	8.94837	10.1267	3.70044	9.57554	8.37504	4.85798	8.36194	8.62936	9.46352	2	6.33985	4.52356	7.54689	10.2143	8.0607	7.02237	9.1267	6.80735	8.36194	8.35755	10.3869	7.3837	7.19967	8.43045	6.94251
DNAH17	1.09014	7.35656	6.98654	1.15829e-11	2.45347e-10	15.9343	UP	5.70044	7.01123	5.58496	9.43254	9.73302	8.76487	8.97441	6.20945	8.16491	6.70044	6.64386	6.37504	7.24793	7.54689	8.01681	7.33985	8.90689	6.62936	7.88264	6.82018	6.79442	8.3966	7.52356	8.87344	6.97728	7.52356	6.90689	5.88264	7.86419	6.10852	8.32193	7.05528	5.39232	8.06609	7.03342	7.02237	8.27146	9.7879	5.97728	6.59991	9.43463	7.66534
DNAH2	1.8176	7.07013	5.65705	2.90878e-08	3.08163e-07	8.3453	UP	3.45943	6.04439	4.90689	9.783	11.056	8.91289	7.74819	4.32193	9.30834	5.85798	4.90689	3	11.7138	7.94251	7.3837	7.61471	8.97154	6.18982	8.58496	8.20457	6.06609	9.2503	5.9542	6.62936	6.98868	9.38154	9.03892	5.83289	9.28077	5.80735	7.50779	8.89785	6.87036	8.18982	5.12928	7.46761	7.57743	10.5177	6.14975	6.32193	8.36194	5.35755
DNAH3	1.55245	6.90628	6.4066	4.12098e-10	6.38912e-09	12.4634	UP	5.72792	7.77479	4.85798	8.64024	6.64386	8.16993	8.55459	6.94251	8.07146	4.9542	5.80735	6.56986	7.79442	5.85798	6.12928	8.65821	8.94837	7.66534	7.91886	6.44294	7.39232	9.16239	7.7211	9.52552	7.06609	9.22882	6.83289	5.2854	3.80735	6.83289	6.83289	6.64386	7.41785	9.06609	7.62205	5.97728	6.58496	9.81858	6.55459	6.71425	6.26679	7.70044
DNAH5	1.38823	7.1564	4.92868	1.20768e-06	8.9356e-06	4.76551	UP	7.74147	7.92481	5.75489	8.16491	10.2479	9.35535	8.82018	5.49185	6.62936	6.61471	3.32193	6.04439	5.45943	7.63662	8.49185	6.22882	9.04439	4.45943	5.67243	6.08746	8.67596	8.16491	8.58871	7.34873	4.16993	5.88264	9.36851	7.22882	6.65821	6.52356	5.78136	4.39232	3.90689	10.8963	6.2854	8.93074	8.33985	8.99435	7.53916	7.34873	6.71425	6.94251
DNAH6	1.03142	6.94086	4.24306	2.73344e-05	0.000138494	1.79774	UP	5.61471	5.72792	6.59991	6.93074	9.07682	9.17243	8.71768	5.16993	7.64386	6.88264	5.35755	5.75489	5.39232	9.2738	6.96578	9.04712	8.34873	5.90689	6.70044	6.47573	5.58496	8.13443	10.7013	7.11894	8.08746	6.40939	6.39232	5.35755	7.11894	5.2854	6.33985	8.18982	6.56986	6.39232	7.40939	5.97728	8.98584	9.61471	5.70044	6.71425	6.24793	6.84549
DNAJB5	-1.9363	9.4714	-7.65451	1.42623e-13	4.34929e-12	20.2204	DOWN	8.09276	10.3597	8.39232	10.4878	9.9263	8.90388	9.17991	7.66534	9.89633	7.52356	9.38154	10.7895	9.59246	9.59619	13.8454	6.72792	8.83289	7.27612	7.45943	7.07682	7.6865	9.11114	8.5157	8.49185	7.47573	8.33092	7.63662	7.69349	8.35315	10.7082	9.61102	8.53528	9.8933	10.3912	8.60363	13.828	8	7.82655	10.3038	11.8309	10.4512	8.67596
DNAJC18	-1.05461	8.6268	-7.20289	2.87967e-12	6.81382e-11	17.2896	DOWN	7.06609	9.52552	7.27612	9.30834	9.39017	9.64926	9.73978	6.61471	8.66178	6.80735	8.60363	8.99718	8.42206	9.24793	10.9993	8.36632	8.8009	7.49985	8.76155	7.09803	7.33985	8.57365	7.8009	9.70044	7.62936	7.8009	7.87652	6.52356	7.61471	9.56224	9.41785	7.6865	7.57743	9.44087	7.72792	10.5962	7.90087	8.71768	8.27612	8.98299	10.0471	8.15987
DNAJC22	1.945	10.4351	8.17821	3.71782e-15	1.57991e-13	23.7836	UP	11.2432	9.92333	10.0112	11.6334	8.92481	12.5479	10.8588	9.61287	11.1978	10.8657	9.06609	10.8082	10.7406	12.1392	9.56033	9.88417	10.8994	10.5304	11.6537	11.272	10.1072	11.8514	11.3354	11.375	12.1539	11.3044	11.7698	8.83289	10.5028	10.9816	11.6284	11.0077	9.57554	12.0573	11.2503	8.17493	11.8412	11.0708	10.3859	8.40514	10.3332	9.97441
DNAJC5B	1.62573	5.23821	5.70652	2.22491e-08	2.41102e-07	8.60382	UP	7.71425	4.9542	6.52356	6.2854	3	5.75489	6.74147	0	4.58496	3	6.80735	4.45943	4.08746	7.05528	3.45943	4.45943	6.52356	3.16993	3	2.80735	4.70044	7.6865	3.45943	4.52356	4.70044	6.67243	4.58496	2	7.97154	5.58496	6.58496	6.97728	3.80735	4.85798	4.64386	4.24793	5.35755	6.49185	5.2854	4.24793	4.32193	5.52356
DNASE1L2	1.1681	4.84674	4.74698	2.86537e-06	1.95165e-05	3.94024	UP	4.75489	6.16993	4.32193	6.10852	6.85798	7.24793	5.52356	3.32193	5.72792	4.58496	3.45943	3.80735	5.93074	5.12928	5.24793	5.2854	5.24793	5.08746	6.74147	6.50779	2	6.83289	6.58496	7.22882	6.02237	5.58496	5.78136	1.58496	5.16993	4.16993	5.9542	5.78136	4.80735	3.45943	6.84549	4.39232	6.42626	4.9542	5.61471	2.80735	5.83289	5.70044
DNASE1L3	-2.69793	6.74251	-8.19109	3.39167e-15	1.45216e-13	23.8734	DOWN	7.40088	4.90689	5.88264	5.9542	3.45943	7.98868	11.5454	4.58496	5	7.27612	9.25739	5.16993	4.9542	7.57743	6.10852	8.18488	8.33092	6.56986	4.52356	4.24793	7.04439	5.58496	5	5.67243	4.64386	8.48784	7.69349	6.35755	6.78136	5.64386	4.85798	5.35755	6.52356	4.16993	7.76155	6.80735	7.96	7.67243	4.08746	6.44294	5.88264	9.29002
DNASE2B	1.02576	3.17803	3.26015	0.0012073	0.00413374	-1.73995	UP	5	2.32193	4.58496	4.58496	1	5.85798	6.75489	1	3.58496	0	6.79442	3.16993	2.58496	3.58496	1.58496	2.80735	4.39232	2.32193	3.16993	5.67243	1.58496	6.33985	2.32193	3.80735	4.32193	3.80735	3	0	2	4.24793	4.70044	4.85798	3.70044	1	1	2.32193	2	4.58496	2.32193	3.32193	2.58496	5.75489
DNER	-3.09416	5.35762	-7.50514	3.91031e-13	1.10005e-11	19.2362	DOWN	1.58496	7.42626	3.70044	6.91886	11.2131	5.39232	4.9542	6.98868	3.32193	2	5.16993	6.62936	8.41363	5.12928	8.01123	3.90689	7.39232	1	3.90689	8.28077	6.76818	8.12928	3	6.22882	4.9542	4.52356	5.32193	5.45943	1	5.67243	4.90689	3	1	8.91886	4	7.08746	5.49185	7.14975	5.52356	5.2854	7.12928	4.39232
DNM1P46	-1.03485	3.36872	-3.94633	9.34837e-05	0.000420504	0.638997	DOWN	1	2.58496	0	4.32193	1.58496	4.39232	7.07682	0	1.58496	1.58496	4	1	2	4.24793	5.88264	2	5.45943	2.58496	3	0	2.32193	4.70044	3	5.04439	2.32193	4.52356	1	2.32193	1.58496	4.32193	4	2.80735	1.58496	3.58496	3.32193	4.70044	3.32193	5.64386	1	4.24793	3.80735	3.90689
DNMT1	1.10994	12.4473	10.2241	5.45395e-22	8.34577e-20	39.2075	UP	12.4959	12.9376	12.5294	13.7247	12.9467	13.379	13.3669	10.128	13.3712	12.8254	11.819	12.7541	12.9784	13.1746	12.1665	12.4929	12.3432	11.4062	13.2101	12.6312	11.1066	12.3069	13.2853	15.8874	12.8285	12.3126	12.3856	10.3163	14.1451	13.7663	12.2243	13.7353	11.8514	12.1706	12.9222	11.6216	13.5378	12.0795	11.2336	10.1573	12.6847	12.3979
DNMT3B	1.9389	8.5752	8.21665	2.82591e-15	1.23789e-13	24.0518	UP	8.67596	8.09803	8.0607	10.5118	10.2935	11.4848	7.98868	6.37504	10.1228	8.93369	6.90689	8.30378	8.31741	7.84549	8.18982	7.45121	8.56224	8.52748	9.77972	9.69349	7.8009	9.22882	9.61839	12.169	7.92481	10.4429	9.22882	6.83289	8.77479	9.7211	9.28077	6.61471	9.19229	9.03617	7.70044	6.72792	9.54303	9.9629	8.77479	6.22882	8.40088	8.65821
DOC2A	1.49631	5.4112	4.70331	3.51262e-06	2.3549e-05	3.74603	UP	2	5.49185	2	7.72792	7.65821	6.76818	5.58496	3.90689	6.45943	4.16993	3.58496	4.08746	4.24793	4.39232	5.45943	5.83289	6.52356	4.64386	8.50779	2.80735	4.75489	6.45943	5.97728	9.56605	5.32193	7.60733	3.90689	3.90689	2	8.26209	7.54689	4	6.89482	5.42626	5.16993	4.64386	5.20945	8.85798	6.02237	4.75489	5.08746	4.16993
DOCK3	-1.02153	6.96534	-3.49631	0.000523722	0.00196585	-0.96923	DOWN	3.80735	9.33985	5.39232	8.24317	6.82018	7.84549	7.57743	5.42626	8.37938	3.45943	5.67243	7.67948	7.83289	8.97154	10.1267	6.64386	7.40939	7.49985	6.12928	5.12928	5.58496	8.76487	7.85175	6.74147	6.90689	7.19967	5.58496	6.10852	5.39232	7.79442	6.85798	6.6865	6.78136	9.38586	5.45943	10.1812	6.16993	8.43045	6.88264	8.44708	6.10852	6.37504
DPF1	1.04681	5.83623	4.99755	8.644e-07	6.60474e-06	5.08551	UP	6.24793	8.21432	6.08746	7.67948	4.16993	6.04439	5.67243	3.70044	5.45943	4.9542	4.85798	4.52356	5.78136	7.81378	6.6865	5.35755	6.89482	4.90689	5.97728	6.40939	4.32193	6.14975	6.72792	5.78136	6.71425	5.67243	4.39232	5.67243	6.65821	5.04439	5.88264	6.74147	5.49185	5	6.26679	5.20945	6.12928	8.94544	4.58496	4.9542	7.19967	5.78136
DPP10	-2.42533	3.25307	-5.37479	1.29475e-07	1.18993e-06	6.9073	DOWN	1.58496	5.12928	0	5.39232	0	9.80252	3	2.32193	4.45943	0	2.58496	4.45943	0	4.39232	8.17493	3.45943	6.61471	1	4.08746	1	1.58496	5.97728	1	6.55459	1	9.18488	0	2.58496	0	4.24793	2.80735	1.58496	3	9.36632	3.70044	6.90689	4.90689	8.19967	4.08746	6.67243	3.32193	0
DPP6	-3.70393	4.98438	-8.26005	2.07112e-15	9.36092e-14	24.3557	DOWN	0	8.60363	3	6.91886	4.16993	1.58496	4.58496	2.58496	6.71425	1.58496	2.58496	9.16239	1.58496	5.2854	10.2336	5.12928	7.33092	4	4.85798	1.58496	4.9542	7.14975	3.45943	10.9121	1	3.90689	1.58496	4	4.64386	6.79442	4.75489	2.32193	5.61471	8.34873	3.90689	11.5088	4.80735	7.74819	6.88264	7.93664	3.45943	2
DPPA2	1.07836	1.28794	3.32189	0.000974974	0.00341614	-1.54338	UP	0	0	0	4.70044	0	8.90388	3.16993	1	3.16993	1	0	0	1	1.58496	0	2	5.58496	2.80735	3.58496	0	2.80735	5.39232	0	0	0	9.06609	0	0	0	0	1	1	0	1	2.32193	0	1	7.07682	1.58496	2	1	1.58496
DPT	-4.43829	8.12737	-12.0766	6.61394e-29	4.80201e-26	54.8609	DOWN	4.39232	7.21917	7.25739	9.69174	5.64386	8.60363	9.80413	6.10852	9.25974	6.20945	10.8918	7.72792	8.89178	10.0196	11.1248	5.24793	7.45121	4.24793	7.45943	5.16993	8.86419	6.75489	5.75489	4.90689	6.02237	6.10852	3.80735	8.67596	5.75489	9.76818	7.88874	8.76487	8.51964	6.42626	6.82018	9.63662	6.40939	4.52356	6.62936	8.39232	8.30834	6.72792
DPY19L1	1.16353	11.5276	8.9801	1.01819e-17	7.20813e-16	29.5595	UP	11.128	10.8819	11.5137	11.3669	12.464	12.1418	11.7969	8.55459	12.4144	11.4491	9.84392	12.3035	12.3041	12.0961	11.7266	11.8688	11.7026	10.9622	11.9374	12.3115	10.2808	11.286	12.0888	12.1643	11.7805	11.0526	11.2119	10.0875	13.0471	12.0768	12.4134	11.8198	10.7117	12.8013	12.1687	10.9069	12.8271	10.6724	10.5008	9.48784	12.3611	11.8045
DRAXIN	1.14503	5.32581	4.9929	8.84246e-07	6.74129e-06	5.06378	UP	3.80735	6.24793	4.52356	6.72792	7.76818	5.2854	6.32193	1.58496	4.08746	3.16993	4.08746	6.33985	6.97728	6.37504	5.45943	5.83289	7.19967	3	8	5.70044	4.70044	6.89482	6.10852	6.30378	4.64386	4.08746	3.45943	3.80735	6.22882	6.02237	6.88264	5.24793	5.55459	7.44294	4.9542	4.70044	6.91886	7.92481	4.85798	4.9542	9.37504	6.39232
DRGX	1.61836	3.42575	3.29843	0.00105788	0.00366936	-1.6185	UP	0	4.85798	0	2.58496	5.55459	1.58496	1	1	8.42626	5.24793	6.26679	5	8.18982	10.4594	3	6.78136	3.32193	5.45943	2.32193	8.44294	0	3.58496	7.80735	3	7.43463	0	7.55459	0	0	4.08746	1.58496	5.16993	5.2854	2.80735	4.80735	6.87036	1	4.70044	0	5.78136	4.70044	7.53138
DRICH1	1.06249	3.76603	4.59555	5.76807e-06	3.36346e-05	3.27364	UP	1.58496	1	4.24793	4.70044	6.06609	3.58496	6.08746	3.90689	4.85798	4.24793	4.16993	1	4.32193	3.32193	4.08746	4.58496	5.35755	3.70044	4.24793	3.90689	3.70044	6	5.39232	4.85798	3	5.35755	3.90689	1	3.70044	3	4.70044	1.58496	3.58496	5.39232	3.16993	4.85798	5.16993	6.62936	2.32193	3.80735	4.75489	3.16993
DSCAML1	-2.0365	5.01068	-5.77083	1.56608e-08	1.74757e-07	8.94271	DOWN	6.97728	10.8001	4.08746	8.03342	5.24793	4.58496	7.67948	4.58496	4.58496	2.80735	6.20945	5.08746	4.39232	6	6.62936	3.32193	5.75489	2.58496	7.44294	0	4.45943	4.32193	4.39232	12.0365	2.58496	3.90689	0	4.9542	2	6.26679	4.52356	3.32193	2.80735	8.02237	3.58496	6.52356	4.24793	7.16993	3.16993	6.30378	5.61471	4.16993
DSCC1	1.84436	9.20161	10.4586	7.86223e-23	1.44242e-20	41.1097	UP	8.46352	9.0607	8.29462	9.87958	10.7566	11.4656	8.36632	6.08746	10.6475	10.062	8.77479	10.0741	9.31967	9.75322	8.35315	9.57743	8.73471	9.19967	9.8009	10.3287	8.62205	9.69174	9.51964	11.4131	11.1427	9.66178	10.3332	7.58496	11.3912	10.0417	8.53916	10.4051	9.43254	11.5387	9.74651	8.12412	10.4471	10.2527	7.97154	7.21917	8.46352	8.7039
DSCR4	1.42491	1.51531	3.27434	0.00114975	0.00395663	-1.69507	UP	0	2.58496	0	7.76818	6.40939	9.04985	2.58496	7.2384	1	3.90689	0	0	0	0	0	0	4.08746	5.70044	2	0	5.58496	6.78136	0	7.45121	0	7.16993	0	1	0	0	3.70044	0	0	0	1	0	0	7.05528	6.02237	2.58496	0	1.58496
DSCR8	1.93048	2.09423	3.39104	0.000764461	0.00274826	-1.31909	UP	0	4.9542	0	8.39232	8.82337	11.3581	2.32193	8.31288	1	5.12928	0	0	0	0	0	1	3.90689	8.15987	2.58496	0	8.34873	8.73471	0	8.0607	0	8.97728	0	1	0	0	4.58496	0	1	0	3.16993	1	1	7.90087	8.59246	3.32193	0	2
DSG2	1.41538	14.0853	6.17635	1.5925e-09	2.15987e-08	11.1532	UP	14.2213	13.7917	13.3283	14.8005	15.1691	16.3705	13.1895	12.4878	16.0043	14.006	13.0808	15.046	16.3203	15.8627	12.4097	15.795	14.4427	13.2565	15.8773	15.0829	13.2819	15.1104	14.7532	14.347	15.5305	13.4257	14.7287	12.9715	16.4033	14.159	14.881	16.0506	13.1957	13.0243	14.8415	12.1911	15.6991	15.6976	12.906	12.2615	13.399	14.7312
DSG2-AS1	1.27416	4.87209	4.94189	1.13299e-06	8.43414e-06	4.82658	UP	4.45943	3.32193	3.70044	4.85798	5.49185	6.10852	4.45943	4.9542	6.22882	3.80735	5.2854	7.09803	5.72792	6.93074	3.58496	7.27612	6.06609	3.70044	6.22882	5.55459	4.16993	7.16993	5.45943	5.24793	7.21917	5.12928	6.16993	4	5.24793	3.58496	5.61471	7.06609	5.08746	3.58496	5.35755	3.45943	6.87036	8.27146	5.80735	5.32193	3.80735	4.90689
DSN1	1.03333	10.2794	8.07403	7.78408e-15	3.08224e-13	23.0611	UP	9.92035	10.0498	9.18488	10.4147	11.6022	11.4278	10.2131	7.2384	11.9908	10.8941	9.70044	10.4409	9.93664	10.8025	9.38586	10.8321	10.7322	9.80252	10.4041	10.6555	8.98299	9.783	10.7296	12.6558	10.643	10.6348	10.1072	7.80735	10.7731	11.4231	10.6546	10.7381	10.1202	11.2058	11.188	9.00282	11.117	10.7296	10.5216	8.13955	10.3432	11.4476
DTL	2.36715	10.1449	12.4156	3.12374e-30	2.80511e-27	57.8639	UP	10.3685	11.1402	9.89482	11.115	11.3106	10.6475	9.63662	6.76818	12.2429	11.102	8.73809	11.4378	10.7838	11.3292	8.43463	10.9578	9.94691	10.0553	12.2621	11.2258	8.51964	8.61102	12.7296	12.2473	11.4168	11.0021	10.9418	8.48784	12.3103	10.014	9.83763	11.6124	9.88722	11.2998	10.3185	7.82655	11.4533	9.69174	9.28309	7.7211	9.74987	9.62022
DTNA	-1.71117	8.21976	-5.44026	9.20758e-08	8.76184e-07	7.23521	DOWN	6.18982	9.89026	6.32193	10.7347	9.56796	11.4645	9.39874	7.96578	9.02514	8.57365	7.63662	8.92481	6.62936	9.18982	13.2255	5.78136	8.47573	8.77479	6.08746	6.67243	8.93074	10.0307	5.75489	10.7814	4.45943	8.51964	4.39232	8.17991	5.45943	8.9542	10.2969	5.55459	7.8392	10.3106	7.09803	11.6032	6.61471	9.48784	9.34873	11.1536	9.91886	7.05528
DTX3	-1.01694	9.59925	-4.88115	1.51781e-06	1.0964e-05	4.54698	DOWN	10.1948	10.6119	8.82655	10.6184	10.8517	10.9366	10.3264	8.03892	9.29232	6.55459	9.32867	9.16993	8.87344	9.81218	11.9766	7.52356	8.72792	9.05799	9.45121	6.32193	8.10329	11.2831	8.34873	8.10329	7.8392	10.7632	8.35755	7.81378	7.34873	10.7649	10.5314	8.8009	9.46557	10.2703	8.11374	11.792	9.01959	9.56796	9.98157	10.0914	10.1215	8.26679
DTX4	1.09288	11.8644	6.76026	4.7996e-11	9.08888e-10	14.5515	UP	12.5541	10.4189	11.8746	12.4765	13.2076	12.7651	12.5946	8.85175	13.6534	12.6472	11.8218	11.9776	11.4083	12.3449	10.8408	12.2073	12.4017	12.6239	12.3829	12.6013	10.0607	10.9031	11.8777	12.7492	12.1917	12.8305	12.4873	10.599	12.4686	11.6573	12.4569	12.4107	11.4009	11.1427	12.8897	10.2726	13.6903	10.058	11.5152	10.3298	11.8045	12.6797
DUOXA1	-1.2664	6.51394	-2.98207	0.00303537	0.00930881	-2.58179	DOWN	3.70044	10.0539	2.58496	9.07948	9.8392	10.4717	4.58496	9.36851	5.75489	3.45943	2.32193	6.58496	6.82018	7.74819	4.90689	5	5.16993	6.24793	4	3.58496	9.48985	3.90689	6.33985	4.16993	5.75489	10.1267	6.35755	9.61102	2	6.56986	8.32193	8.21917	4.75489	4.08746	6.75489	3.16993	5.97728	7.7211	6.24793	5.08746	5.75489	7.49985
DUOXA2	-1.43391	8.06361	-2.24147	0.0255342	0.0587189	-4.47077	DOWN	1	9.55459	1	10.032	7.14975	9.33985	7.03342	13.2972	10.1573	7.79442	1	3.90689	3.32193	8.07146	4.80735	9.46148	7.11894	11.5023	10.4273	6.16993	9.73471	7.09803	4.52356	6.71425	10.9046	10.585	8.3966	9.90539	0	7.63662	7.02237	9.45327	7.20945	3.45943	10.2058	4.70044	10.4094	10.4388	12.3379	4.80735	8.39232	13.5427
DUSP1	-1.55013	13.288	-7.00685	1.01775e-11	2.18151e-10	16.0601	DOWN	12.0441	12.8809	13.2784	13.879	12.4453	13.4118	14.7972	12.1715	12.2831	12.537	13.9384	14.2892	13.3079	13.7561	15.3323	11.5425	14.0553	11.03	11.2027	10.8065	13.9044	11.9136	13.6061	11.0014	12.3075	12.9412	12.8984	12.2883	12.7657	15.0639	13.3337	14.3031	14.3737	15.2115	15.4524	13.0102	14.6689	10.9766	12.5615	10.8017	16.6989	13.2142
DUSP26	-2.43663	4.82491	-7.51894	3.56471e-13	1.01623e-11	19.3265	DOWN	1	8.27146	4.52356	5.49185	0	4	4.80735	3.32193	4.16993	3	5.78136	6.59991	2.58496	6.24793	8.49586	3.90689	5.75489	3.70044	4.24793	2.32193	3.16993	6.98868	2.80735	4.85798	4.08746	3.45943	3.70044	3.45943	1.58496	6.84549	6.91886	4	5.88264	5.55459	2.80735	8.47168	4.58496	6	7.02237	7.11894	5.08746	5.08746
DUSP5	-1.57393	10.2363	-7.24465	2.1932e-12	5.3041e-11	17.5549	DOWN	8.82337	10.9425	9.91289	9.76653	8.45121	11.0265	11.5324	8.65821	9.53916	7.40939	11.1793	9.73132	10.0238	10.1774	10.6303	7.53916	10.543	7.62936	8.20945	6.45943	10.2009	9.79766	8.80735	9.62388	8.62936	10.6636	11.3696	9.47978	9.76487	13.3214	9.48985	10.5718	9.61839	10.8765	10.0808	9.35535	10.6582	10.1812	9.20457	7.82655	13.0766	10.2021
DUSP9	1.86096	4.11309	3.76586	0.000190465	0.000799409	-0.0277343	UP	0	2.58496	0	8.37938	4	5.42626	4.16993	3.16993	4	4.32193	1.58496	1.58496	8.61839	1.58496	3.70044	2.32193	4.9542	4.45943	6.26679	7.39232	6.08746	2.80735	8.53528	10.6384	4.80735	8.36194	5.24793	1	0	8.47168	5.24793	0	7.10852	5.83289	5.58496	1.58496	6.14975	6.87036	3.80735	2.58496	3.80735	4.80735
DUXAP10	3.04008	5.44149	9.09906	4.11488e-18	3.09287e-16	30.4473	UP	3.90689	3.16993	5.08746	8.53138	7.82655	8.41363	7.65821	7.71425	7.33985	5.12928	2	10.0901	7.04439	7.40939	6.42626	1.58496	6.12928	5.49185	3	3.70044	6.47573	7.11894	5	9.79766	4	6.2854	5.35755	3.90689	2	5.45943	7.48382	6.79442	4.58496	6.32193	8.61102	2.32193	2.80735	9.80735	5.45943	5.16993	7.61471	7.49985
DUXAP8	3.02047	7.36253	9.50884	1.71384e-19	1.5849e-17	33.5639	UP	3.58496	6.47573	7.31288	10.3432	10.6266	10.014	8.76818	9.13443	10.2384	7.40088	2.58496	10.2033	7.57743	8.37938	6.97728	5.16993	7.87652	6.55459	5.72792	5.20945	8.86419	7.31288	6.44294	10.4242	4.9542	7.56224	9.04166	6.56986	5.04439	8.82337	9.59805	9.82177	8.78136	9.90989	9.64386	5.32193	4.58496	9.78136	6.42626	6.97728	9.97154	8.18488
DUXAP9	2.56738	4.73103	7.8089	4.95375e-14	1.65727e-12	21.2529	UP	2	3.32193	4.70044	7.62936	7.18982	6.2854	5.83289	6.50779	8.54689	5.35755	2.32193	6.30378	6.20945	7.06609	3.70044	3.16993	4.16993	5.80735	2.58496	3.16993	6.50779	3.90689	3	8.50779	3.70044	6.70044	5.9542	4.16993	3.80735	5	6.90689	6.9542	4.58496	6.91886	5.93074	2.58496	1	5.67243	4.24793	3.70044	7.26679	7.63662
DYNAP	-1.29638	1.14451	-3.19587	0.0015029	0.00501565	-1.94087	DOWN	0	3	0	0	0	0	0	5.16993	1.58496	0	1	0	0	0	0	2	2.80735	2.58496	1.58496	0	0	1.58496	0	1.58496	2	0	0	7.71425	1	0	1	0	0	0	0	0	0	2	1	3.58496	1	1
DYNC1I1	-1.17226	6.92452	-3.94015	9.58338e-05	0.00043035	0.615684	DOWN	7.15987	6.79442	5.97728	6.84549	6.78136	8.86109	7.55459	4.16993	6.53916	2.58496	6.22882	8.633	6.35755	6.14975	10.1636	4.39232	6.87036	7.73471	4.24793	3.58496	5.58496	7.6865	5.85798	9.88722	3	6.33985	8.79116	4.80735	4.85798	8.44294	9.47776	5.08746	8.12412	7.39232	6.2854	10.8788	4.75489	7.45121	7.70044	8.54689	8.50383	5.83289
DYNLRB2	-1.44833	2.38937	-5.92704	6.58709e-09	7.93988e-08	9.77933	DOWN	0	2	2.32193	3.16993	1.58496	4.52356	2.80735	0	3	0	1.58496	2.32193	1	1.58496	4.85798	3.32193	3.90689	2.58496	3.16993	0	1.58496	5.9542	0	3.90689	0	4.32193	1	1.58496	1	2.58496	2.58496	2.32193	1.58496	4.58496	2.58496	3.45943	1.58496	4.90689	2.58496	3.32193	3.32193	2
E2F1	1.78248	10.2322	9.7341	2.87881e-20	3.11862e-18	35.3141	UP	10.1636	11.5201	10.3923	10.3015	12.5503	11.5294	9.48985	7.85798	11.3371	11.4671	9.633	10.341	9.92035	10.8297	8.67596	9.61102	10.8619	10.3531	10.5943	10.7764	9.66888	10.0967	11.4273	13.1958	10.5925	11.0334	11.1911	8.09803	11.0721	12.014	9.76321	10.2715	9.75656	10.8439	11.2715	8.16993	11.5245	9.99718	11.2485	7.21917	9.94837	10.1189
E2F2	1.29732	9.36852	5.34691	1.49547e-07	1.35831e-06	6.76872	UP	9.73809	10.0553	9.57365	10.1383	10.7532	10.9307	9.37938	6.45943	9.8009	11.3647	9.22641	9.22641	10.1241	11.158	7.42626	8.77479	10.0914	8.67948	10.6083	10.8361	9.11894	9.2854	10.4398	11.2639	10.7099	10.2192	9.45943	7.86419	11.6193	10.5206	9.06609	11.0028	7.17991	9.48784	11.2894	7.02237	11.896	9.87958	8.89785	6.45943	9.05528	9.15987
E2F3	1.32659	10.4073	12.5366	1.04081e-30	1.1457e-27	58.9452	UP	9.65464	10.5661	9.85953	11.3112	11.8696	11.6243	10.5088	8.51964	11.7875	9.8933	9.15987	10.7194	11.3354	10.5925	10.6211	10.2288	10.1824	10.2288	11.5699	10.4778	10.0293	10.4136	10.6257	11.5401	10.3934	11.279	10.5603	8.03892	11.9944	10.7448	11.6384	10.9106	10.1561	10.3718	10.9396	10.1611	10.8242	10.3729	9.65464	8.38802	11.0788	10.6092
E2F7	2.69558	8.82168	11.1899	1.60337e-25	4.93929e-23	47.1974	UP	8.88264	9.86882	9.0607	9.74987	10.1241	9.94544	9.35535	6.94251	10.6193	9.65642	7.07682	9.56796	9.73809	9.66178	7.01123	9.44087	9.10852	9.04712	10.2981	10.5708	8.12928	9.00562	10.3343	10.7723	10.0498	8.93664	9.88417	6.78136	11.4163	9.33092	8.5157	10.1228	7.20945	9.40301	9.56796	5.61471	11.2842	8.27146	7.19967	7.32193	9.17991	9.66356
E2F8	1.83734	9.80725	7.98448	1.46143e-14	5.42064e-13	22.4455	UP	9.47168	9.89936	10.0808	10.7871	10.7271	11.4067	10.9001	7.81378	11.4737	11.0654	8.98014	11.8174	9.97585	10.8114	7.37504	9.99152	10.2192	10.7364	9.79116	11.6883	8.02237	8.91886	10.2644	10.9069	11.0668	10.5196	11.207	8.37504	11.5915	10.0782	10.218	10.6546	9.22882	10.3487	11.1072	7.71425	10.9993	8.54689	9.31967	6.71425	9.97441	11.2113
ECEL1	1.67192	6.10495	4.24147	2.75202e-05	0.000139265	1.79133	UP	5.42626	5.67243	7.55459	7.21917	3.58496	9.62936	8.21917	8.95128	6.61471	2	7.65105	5.83289	7.03342	7.09803	9.37938	2.58496	5.52356	0	1.58496	3.32193	3	7	5.90689	11.9414	4.24793	6.20945	2.58496	1.58496	7.78136	6.87036	8.21917	7.67243	3.90689	7.54689	2	6.84549	4.70044	4.24793	6.80735	4.90689	3.32193	5.61471
ECEL1P2	1.24069	1.97538	3.83645	0.000144659	0.000625012	0.229598	UP	1	0	1	0	4.70044	0	2.58496	0	0	0	0	0	1	2	2	0	3.70044	0	3.32193	2	0	2.32193	1.58496	4	2	2.80735	0	2.32193	3.58496	0	2.80735	1.58496	2.32193	2	3	0	2	4.85798	4.16993	3.16993	1	4.52356
ECHDC3	-1.19296	7.87907	-3.20716	0.00144656	0.00484897	-1.90586	DOWN	5.72792	5.64386	5.58496	9.91588	3.58496	5.24793	7.13955	8.34873	10.774	4.39232	7.03342	8.57365	5.12928	8.77479	9.42206	8.10852	9.13955	9.96434	9.60177	9.46557	9.76155	6.94251	9.58308	4.70044	10.0875	9.98299	9.43463	8.91588	5.88264	11.7561	10.1997	6.32193	12.3157	4.32193	5	7.31288	6.45943	8.90087	8.224	5.93074	8.72451	6.10852
ECRG4	-4.80904	6.7196	-9.15466	2.68722e-18	2.07934e-16	30.865	DOWN	5	7.35755	8.17991	6.72792	2.32193	6	8.66888	5.20945	9.04712	4.70044	6.83289	11.3712	4.9542	7.77479	11.6303	3.58496	6.84549	1	4.80735	2.58496	6.94251	10.2312	4.08746	5.52356	1.58496	2.32193	8.23362	7.35755	0	11.0855	8.21432	1.58496	10.2992	6.79442	7.08746	13.4149	3.32193	7.60733	8.70044	10.0098	4.16993	6.10852
ECT2	2.43447	12.2532	13.6378	3.89094e-35	1.20704e-31	68.9767	UP	12.2186	11.9636	13.0997	12.0372	14.1733	14.4045	10.5831	11.3359	13.5267	11.9982	9.88874	12.8967	13.8308	12.8478	11.1529	12.2659	12.8933	12.1434	13.4876	12.9981	11.8865	12.2863	13.2281	12.4558	12.8291	13.0338	13.3604	11.1402	14.0527	12.6622	12.4873	12.5772	11.2744	13.0507	13.211	10.4888	13.9433	12.2091	11.0244	9.42626	12.4873	12.4338
EDN2	-2.07774	4.65959	-4.97204	9.78816e-07	7.38473e-06	4.96653	DOWN	6.91886	3.32193	3.70044	1.58496	4.16993	3.58496	7.84549	8.25267	1	5.52356	7.61471	3	4.45943	3.45943	3.16993	4.52356	2.32193	1	6.16993	4.45943	9.93369	4.85798	6.64386	4.80735	6.55459	1.58496	7.52356	5.16993	3.16993	4	1.58496	5.2854	2.32193	4.75489	2.80735	3.45943	7.91289	5.24793	5.2854	7.21917	3.45943	6.14975
EDN3	-2.06444	6.95878	-4.1546	3.97425e-05	0.00019435	1.44423	DOWN	5.78136	7.14975	9.03342	7.74819	8.09276	10.2324	8.77479	4.80735	8.75154	2.32193	8.52748	7.91886	6.47573	8.99718	6.44294	10.4848	3	7.85798	4.80735	9.76984	8.7879	5.20945	11.1793	10.5755	9.58308	6.45943	9.54496	6.87036	8.89482	4.58496	0	9.59805	4.58496	4.9542	10.2216	7.2384	9.17991	8.36194	4	7.39232	10.5304	8.07682
EEF1A2	-3.06644	7.15162	-5.80508	1.29728e-08	1.47364e-07	9.12453	DOWN	2.58496	4.90689	2.58496	8.38802	4.58496	5.93074	7.12928	11.3365	4.08746	2.80735	5.45943	6.55459	8.5812	10.0553	8.46352	4.39232	6.47573	4.32193	3	5.32193	12.3867	6.75489	7.10852	13.582	2	12.9871	5.80735	7.27612	5.78136	11.9894	5.2854	2.58496	5.12928	15.2441	4.85798	7.96578	8.48382	4.9542	6.97728	6.2854	7.33092	4.90689
EFCAB1	-1.31258	3.15129	-4.95574	1.05946e-06	7.94047e-06	4.89078	DOWN	0	2.58496	0	4.85798	0	2.80735	4.08746	0	2.32193	0	3.16993	2.32193	3.32193	4	2.80735	4.08746	5.90689	0	3.45943	1.58496	2.58496	6.56986	2	3	1	1.58496	0	2.58496	1.58496	4.75489	4.90689	3.58496	2.80735	4.24793	4	3.32193	2.32193	7.77479	3.32193	4.39232	5.16993	2.32193
EFCC1	-1.10168	7.95419	-5.61258	3.69517e-08	3.84639e-07	8.11458	DOWN	6.02237	10.6303	4.32193	8.34873	8.26679	9.92481	7.99435	6.45943	8.16491	8.87344	8.17493	8.10852	8.85175	9.224	9.04439	7.09803	7.69349	7.62936	7.34873	9.08481	7.99435	6.93074	8.20945	8.51964	9.06878	6.98868	6.45943	6.22882	8.07146	8.87958	8.16491	7.5157	7.83289	7.11894	8.77149	8.26209	9.75154	7.50779	7.40088	7.36632	7.98299	7.72792
EFHC2	-1.35705	6.19668	-4.75696	2.73444e-06	1.87294e-05	3.98486	DOWN	4.52356	6.08746	3.80735	6.39232	5.9542	6.59991	6.82018	5.61471	6.65821	6.16993	4	6.71425	3	6.93074	8.66178	8.33539	7.03342	6.9542	5.80735	3.58496	6.14975	5.67243	7.69349	4.08746	5.80735	6.45943	5.93074	5.80735	3	6.58496	5.90689	4.32193	4.9542	7.71425	6.74147	8.8392	7.74147	5.78136	7.18982	5.24793	5.52356	5.58496
EFNA2	1.70073	7.59697	3.92596	0.000101444	0.000452863	0.562277	UP	10.0901	8.24317	7.43463	10.4584	7.66534	10.3443	7.80735	3	8.11374	8.89785	9.64386	8.99718	4.45943	10.6193	4.70044	8.66534	7.65821	6.94251	8.94544	11.0728	6.62936	9.18735	10.0196	7.04439	11.8777	7.96578	8.66178	6.78136	1.58496	9.31061	4.75489	10.8297	4.39232	6.37504	8.61471	3	6.42626	7.75489	9.85487	5.45943	6.42626	7.29462
EFNA3	1.7703	8.54142	5.77163	1.55915e-08	1.74212e-07	8.94699	UP	8.89785	7.63662	6.16993	8.57365	12.6931	10.2538	6.44294	8.66534	9.78463	9.60177	7.39232	10.1861	12.3046	10.7863	6.89482	8.29921	6.87036	6.6865	12.0563	11.4173	8.98014	9.19967	8.85175	10.6421	10.8194	7.22882	8.25267	7.36632	11.8849	8.12412	8.24793	8.78463	9.57175	10.1536	8.61839	8.76155	10.3376	7.43463	8.29462	5.55459	6.52356	9.9263
EFS	-1.86872	8.22795	-8.03948	9.93119e-15	3.82496e-13	22.823	DOWN	7.10852	9.27612	7.37504	9.30834	7.86419	7.97728	9.56605	6.12928	8.37504	6.6865	9.01681	8.12412	8.5812	9.10852	10.5196	5.61471	7.82655	5.70044	6.94251	6.20945	6.97728	7.31288	8.01123	7.69349	6.24793	8.19967	6.55459	9.08215	7.32193	10.2288	9.26209	8.09276	8.28077	9.16491	6.96578	10.014	6.78136	5.52356	8.45943	8.02791	10.4083	6.64386
EGFL6	1.85898	7.41007	6.22332	1.21246e-09	1.69635e-08	11.4173	UP	7.03342	8.11374	7.63662	10.3185	6.37504	9.25974	8.67948	5.90689	8.47168	5.88264	5.55459	7.58496	7.33985	6.33985	11.4676	7.8009	7.12928	8.27146	7.97728	9.59059	6.44294	6.70044	8.87344	5.64386	8.52356	8.79116	5.64386	6.97728	10.6248	7.12928	7.17991	8.68299	7.55459	10.2228	7.49985	6.72792	7.55459	6.82018	8.89482	4.24793	10.9922	8.11894
EGR1	-1.01432	13.2988	-4.08622	5.28414e-05	0.000251697	1.17562	DOWN	12.8916	12.118	13.3116	14.2418	10.224	14.2279	15.6977	13.6271	13.2574	14.6581	13.9755	13.3185	15.156	13.2965	15.4387	11.9762	13.4297	12.8232	11.3907	10.1649	13.4556	12.69	13.1093	11.3794	12.116	12.1085	13.2058	13.2674	13.68	15.3036	13.3958	14.67	13.3035	13.7894	15.4907	12.599	14.9301	11.2533	12.2098	10.9359	15.9661	12.3401
EGR3	-1.0073	9.28078	-3.91754	0.00010492	0.00046679	0.530664	DOWN	8.07682	8.33985	9.35975	9.66	6.89482	8.61471	11.7969	9.75322	9.71253	8.11894	11.1749	8.45533	10.7789	9.65284	11.9009	8.224	9.20212	8.24793	6.71425	4.85798	7.33092	10.1215	9.83763	7.08746	7.44294	9.51767	9.86109	8.90989	9.04712	11.3542	8.87036	10.8887	9.02791	9.55842	9.90839	8.91289	8.66534	7.18982	6.97728	7.32193	12.6762	9.12412
EGR4	1.09094	4.77906	2.77284	0.00581258	0.0164605	-3.16782	UP	1	5.78136	3.16993	5.52356	3	4.85798	4.90689	5.72792	8.13443	4.39232	5.24793	6.39232	5.70044	4.9542	4.08746	5.55459	4.32193	3.90689	1.58496	3.32193	7.76818	6.45943	8.36632	7.88874	6.33985	4.70044	4.70044	3.90689	8.10852	6.76818	7.02237	9.99577	7.72792	2.32193	7.58496	3.70044	2.32193	5.72792	2	2.80735	5.35755	2.32193
EHF	1.46185	12.1918	5.02364	7.60763e-07	5.89581e-06	5.20779	UP	12.2764	11.7928	11.9163	12.6004	14.0942	13.5674	13.1103	11.6573	13.8029	12.6275	9.96723	12.9721	13.9705	13.2953	10.3663	13.4175	12.6691	11.6443	12.6909	12.7172	12.1548	10.4491	12.5245	11.2935	12.7362	12.7398	12.5753	12.3304	13.3489	13.5204	11.0423	12.2594	10.6742	14.1683	11.5048	10.2703	12.923	9.50978	10.2396	8.79442	13.2959	12.8978
EIF1AY	-1.53865	6.28621	-2.05839	0.0401891	0.0859873	-4.85735	DOWN	1.58496	7.74819	8.97154	8.0607	1	7.94251	2	0	0	5.12928	10.2432	11.3443	10.5372	9.90238	11.352	1	3	1.58496	10.9476	10.6582	9.15735	10.8903	6.87036	10.858	0	2.32193	0	1.58496	0	2.32193	0	11.294	8.01123	8.92184	2.32193	11.1693	3.16993	10.8392	7.8392	9.07948	9.18239	8.88264
EIF4E3	-1.27254	10.675	-7.89574	2.7149e-14	9.52139e-13	21.8403	DOWN	8.92184	10.3399	9.62205	10.9866	8.7039	11.5488	11.941	8.92481	10.5088	8.6865	9.71253	10.5479	11.6808	12.2989	12.6768	10.6165	10.7022	9.31741	10.5488	9.59991	8.84862	9.67948	10.7855	9.37069	11.258	9.92926	10.2808	9.24793	11.6179	11.6773	10.255	10.0334	9.04166	12.0798	11.1504	12.9547	11.4057	8.99152	10.7912	11.3592	10.7674	11.0954
ELANE	-2.33907	2.87806	-7.79522	5.44361e-14	1.79998e-12	21.1608	DOWN	1.58496	2.80735	0	3.58496	0	4.58496	4.24793	2.58496	4.16993	0	6.18982	4.08746	2.58496	4.39232	6.47573	2.58496	2.80735	0	2.32193	0	2	4.08746	1.58496	2.80735	1.58496	1	2	1	1	3.58496	3.16993	2	1.58496	3	2.32193	3.90689	3	6.61471	2.80735	3	3.70044	2.32193
ELAVL4	-1.20551	4.91777	-4.33124	1.8701e-05	9.82986e-05	2.1569	DOWN	4.39232	8.13443	4.52356	6.62936	0	3.90689	5.45943	2	5.45943	2	5.20945	6.59991	4.58496	6.20945	8.17991	5.39232	6.52356	3.45943	4.9542	3.58496	3	6.16993	3.80735	9.03067	4.24793	6.79442	4.32193	4	4.52356	5.2854	5.75489	3.70044	3.45943	4.58496	5.16993	7.20945	3.80735	7.13955	5.64386	5.67242	4.24793	5.16993
ELF3	1.56001	14.1349	6.34103	6.07991e-10	9.11158e-09	12.0863	UP	14.5539	13.5226	13.4939	14.1155	15.6388	15.6295	13.137	13.4816	14.991	15.2151	13.9452	14.9252	14.1937	15.6464	11.4843	14.9285	14.4455	14.3305	15.2217	13.8554	14.2651	14.1751	14.95	14.0975	15.1596	14.3292	15.1603	12.7645	14.9323	14.4887	14.9568	15.5465	14.0341	14.0998	15.5435	12.2479	15.7442	14.3144	15.1716	11.4742	13.8393	14.1858
ELFN1-AS1	2.69441	6.62007	6.19871	1.39891e-09	1.92564e-08	11.2787	UP	0	5.61471	3.70044	8.224	6.35755	4.08746	5.55459	5.45943	7.03342	10.5479	5.97728	11.1755	7.63663	6.79442	4.70044	6.90689	4	7.19967	9.33539	8.47573	8.66178	4.85798	9.00563	10.5803	9.07949	7.30378	8.56986	4.24793	7.40088	5.16993	8.49185	9.85331	10.4367	6.74147	7.93074	6.08746	9.11894	7.14975	5.42626	2.58496	5.88264	5.78136
ELFN2	1.08254	3.98657	3.19388	0.00151306	0.00504313	-1.94704	UP	2.40368	2.16096	5.72972	3.77345	3.78112	5.77297	5.91645	2.42899	2.96537	3.11441	2.35022	1.85022	3.83267	3.42274	3.47126	5.80251	4.74593	3.39721	2.5	6.06012	3.7539	2.66096	6.24593	6.88873	2.16096	2.35022	6.11441	2.58496	2.32193	5.30366	3.72972	2.83621	3.95344	6.00351	4.32012	2.91644	7.54435	5.12869	3.91009	3.12396	4.97928	2.90368
[truncated: 3,340 more rows]
[truncated: 365 more columns]
